# Supplementary material
Source: publisher figshare collection journal article supplement (https://gsajournals.figshare.com/articles/dataset/_/6213629)
Supplement: Supplementary file 1 [file 1]

## Sheet: Viab_REG_ETOH_5e-5_annotation
ID	MinorAllele	MajorAllele	MAF	MinorAlleleCount	MajorAlleleCount	REG_MixedPval	ETOH_MixedPval	AvgMixedPval	Sens_DiffMixedPval	RefAllele	Fbgns
3R_21496299_SNP	T	C	0.06091	12	185	0.0235689	5.29899e-08	1.10333e-05	0.0101205	C	FBgn0039354	Lgr3	INTRON	0					SiteClass[FBgn0039354|Lgr3|INTRON|0],TranscriptAnnot[INTRON(MODIFIER||||765|Lgr3|protein_coding|CODING|FBtr0084899|5|1)]	-
3R_23513275_SNP	G	A	0.08718	17	178	0.0454977	1.587e-07	3.79303e-05	0.00753083	A	FBgn0051055	CG31055	SYNONYMOUS_CODING	0	FBgn0046258	CG12880	INTRON	0	SiteClass[FBgn0051055|CG31055|SYNONYMOUS_CODING|0;FBgn0046258|CG12880|INTRON|0],TranscriptAnnot[SYNONYMOUS_CODING(LOW|SILENT|caT/caC|H140|415|CG31055|protein_coding|CODING|FBtr0085242|2|1);SYNONYMOUS_CODING(LOW|SILENT|caT/caC|H149|424|CG31055|protein_coding|CODING|FBtr0085244|2|1);SYNONYMOUS_CODING(LOW|SILENT|caT/caC|H161|436|CG31055|protein_coding|CODING|FBtr0085243|1|1);INTRON(MODIFIER||||330|C…	(TF_binding_site|mE1_TFBS_chinmo|FBsf0000213501);(TF_binding_site|mE1_TFBS_HSA|FBsf0000375810)
2R_17449693_SNP	T	G	0.05525	10	171	0.0844286	2.73449e-07	0.000100311	0.00413539	G	FBgn0034636	CG10440	SYNONYMOUS_CODING	0					SiteClass[FBgn0034636|CG10440|SYNONYMOUS_CODING|0],TranscriptAnnot[SYNONYMOUS_CODING(LOW|SILENT|ccC/ccA|P63|338|CG10440|protein_coding|CODING|FBtr0071692|4|1);SYNONYMOUS_CODING(LOW|SILENT|ccC/ccA|P92|367|CG10440|protein_coding|CODING|FBtr0308642|5|1)]	-
2R_17268490_SNP	A	G	0.4202	79	109	0.327035	3.14381e-07	0.000672898	0.000290706	G	INTERGENIC		INTERGENIC						SiteClass[|||],TranscriptAnnot[INTERGENIC(MODIFIER||||||||||1)]	(TF_binding_site|mE1_TFBS_inv|FBsf0000236815);(TF_binding_site|mE1_TFBS_sens|FBsf0000229209)
3L_11370995_SNP	A	C	0.1231	24	171	0.0224755	3.35873e-07	2.38381e-05	0.0234358	C	INTERGENIC		INTERGENIC						SiteClass[|||],TranscriptAnnot[INTERGENIC(MODIFIER||||||||||1)]	(TF_binding_site|mE1_TFBS_HSA|FBsf0000364205);(TF_binding_site|mE1_TFBS_sens|FBsf0000223917)
2R_20110617_SNP	A	G	0.08808	17	176	0.0552249	3.7046e-07	6.8412e-05	0.00874871	G	FBgn0050419	CG30419	INTRON	0					SiteClass[FBgn0050419|CG30419|INTRON|0],TranscriptAnnot[INTRON(MODIFIER||||297|CG30419|protein_coding|CODING|FBtr0072275|1|1)]	-
2L_13674905_SNP	A	G	0.4686	82	93	0.00933231	4.33064e-07	1.06863e-05	0.0566137	G	INTERGENIC		INTERGENIC						SiteClass[|||],TranscriptAnnot[INTERGENIC(MODIFIER||||||||||1)]	-
2R_17180764_SNP	A	G	0.1684	33	163	0.0187857	4.83158e-07	2.32247e-05	0.0324173	G	FBgn0050390	Sgf29	SYNONYMOUS_CODING	0	FBgn0016726	RpL29	UPSTREAM	509	SiteClass[FBgn0050390|Sgf29|SYNONYMOUS_CODING|0;FBgn0016726|RpL29|UPSTREAM|509],TranscriptAnnot[SYNONYMOUS_CODING(LOW|SILENT|Ctg/Ttg|L16|289|Sgf29|protein_coding|CODING|FBtr0071617|2|1);SYNONYMOUS_CODING(LOW|SILENT|Ctg/Ttg|L16|289|Sgf29|protein_coding|CODING|FBtr0342888|3|1);UPSTREAM(MODIFIER||509||76|RpL29|protein_coding|CODING|FBtr0071592||1);UPSTREAM(MODIFIER||509||76|RpL29|protein_coding|CODI…	(TF_binding_site|BDTNP1_TFBS_dl|FBsf0000303655);(TF_binding_site|BDTNP1_TFBS_Med|FBsf0000281130);(TF_binding_site|BDTNP1_TFBS_slp1|FBsf0000272286);(TF_binding_site|mE1_TFBS_HSA|FBsf0000359013)
3R_18711783_SNP	T	C	0.06633	13	183	0.160192	8.7417e-07	0.000362129	0.00263536	T	INTERGENIC		INTERGENIC						SiteClass[|||],TranscriptAnnot[INTERGENIC(MODIFIER||||||||||1)]	(TF_binding_site|BDTNP1_TFBS_da|FBsf0000330201);(TF_binding_site|BDTNP1_TFBS_twi|FBsf0000265819)
3R_13309363_SNP	G	C	0.06771	13	179	0.0493233	1.00115e-06	9.24175e-05	0.0160755	C	FBgn0261046	Dscam3	INTRON	0					SiteClass[FBgn0261046|Dscam3|INTRON|0],TranscriptAnnot[INTRON(MODIFIER||||2007|Dscam3|protein_coding|CODING|FBtr0113397|18|1);INTRON(MODIFIER||||1006|Dscam3|protein_coding|CODING|FBtr0113398|18|1);INTRON(MODIFIER||||2087|Dscam3|protein_coding|CODING|FBtr0330211|18|1);INTRON(MODIFIER||||2077|Dscam3|protein_coding|CODING|FBtr0330212|18|1)]	-
3L_13861834_SNP	T	G	0.05612	11	185	0.0292749	1.06357e-06	5.34974e-05	0.0292678	G	FBgn0264006	dysc	UTR_3_PRIME	0					SiteClass[FBgn0264006|dysc|UTR_3_PRIME|0],TranscriptAnnot[UTR_3_PRIME(MODIFIER||3203||1254|dysc|protein_coding|CODING|FBtr0330418|17|1);UTR_3_PRIME(MODIFIER||3995||866|dysc|protein_coding|CODING|FBtr0330417|15|1);UTR_3_PRIME(MODIFIER||3995||1015|dysc|protein_coding|CODING|FBtr0330419|17|1);UTR_3_PRIME(MODIFIER||3995||986|dysc|protein_coding|CODING|FBtr0330420|16|1);UTR_3_PRIME(MODIFIER||3995||990…	-
3L_19145852_SNP	T	A	0.07216	14	180	0.0792563	1.4142e-06	0.000185065	0.0103619	A	FBgn0016797	fz2	INTRON	0					SiteClass[FBgn0016797|fz2|INTRON|0],TranscriptAnnot[INTRON(MODIFIER||||694|fz2|protein_coding|CODING|FBtr0075028|2|1);INTRON(MODIFIER||||694|fz2|protein_coding|CODING|FBtr0112890|2|1);INTRON(MODIFIER||||694|fz2|protein_coding|CODING|FBtr0299586|6|1);INTRON(MODIFIER||||694|fz2|protein_coding|CODING|FBtr0330194|5|1);INTRON(MODIFIER||||806|fz2|protein_coding|CODING|FBtr0330195|2|1);INTRON(MODIFIER||…	(TF_binding_site|BDTNP1_TFBS_da|FBsf0000327609);(TF_binding_site|mE1_TFBS_cad|FBsf0000245372)
3R_23521303_SNP	T	C	0.07979	15	173	0.189026	1.51762e-06	0.000560004	0.00264013	C	FBgn0263025	CG43320	SYNONYMOUS_CODING	0	FBgn0263597	Acp98AB	DOWNSTREAM	530	SiteClass[FBgn0263025|CG43320|SYNONYMOUS_CODING|0;FBgn0263597|Acp98AB|DOWNSTREAM|530;FBgn0086346|ALiX|DOWNSTREAM|885],TranscriptAnnot[SYNONYMOUS_CODING(LOW|SILENT|tgC/tgT|C109|398|CG43320|protein_coding|CODING|FBtr0306924|1|1);DOWNSTREAM(MODIFIER||530||25|Acp98AB|protein_coding|CODING|FBtr0310089||1);DOWNSTREAM(MODIFIER||885||836|ALiX|protein_coding|CODING|FBtr0085241||1)]	(TF_binding_site|mE1_TFBS_sens|FBsf0000233811)
2R_16366345_SNP	G	A	0.1895	36	154	0.24706	1.80995e-06	0.000860641	0.0016993	A	FBgn0086604	CG12484	UTR_3_PRIME	0					SiteClass[FBgn0086604|CG12484|UTR_3_PRIME|0],TranscriptAnnot[UTR_3_PRIME(MODIFIER||846||1201|CG12484|protein_coding|CODING|FBtr0112775|21|1);UTR_3_PRIME(MODIFIER||846||1194|CG12484|protein_coding|CODING|FBtr0273284|20|1);UTR_3_PRIME(MODIFIER||846||1142|CG12484|protein_coding|CODING|FBtr0342690|19|1)]	-
2R_19105254_SNP	A	G	0.1042	20	172	0.0758073	2.00266e-06	0.000203922	0.0130597	G	INTERGENIC		INTERGENIC						SiteClass[|||],TranscriptAnnot[INTERGENIC(MODIFIER||||||||||1)]	(TF_binding_site|BDTNP1_TFBS_da|FBsf0000325237);(TF_binding_site|BDTNP1_TFBS_dl|FBsf0000304070);(TF_binding_site|BDTNP1_TFBS_Med|FBsf0000281356);(TF_binding_site|BDTNP1_TFBS_prd|FBsf0000274641);(TF_binding_site|BDTNP1_TFBS_twi|FBsf0000200232);(TF_binding_site|mE1_TFBS_HSA|FBsf0000359711);(TF_binding_site|mE1_TFBS_HSA|FBsf0000359712)
3L_3312145_SNP	A	G	0.05051	10	188	0.119833	2.25953e-06	0.000369312	0.00721583	G	FBgn0035432	ZnT63C	SYNONYMOUS_CODING	0					SiteClass[FBgn0035432|ZnT63C|SYNONYMOUS_CODING|0],TranscriptAnnot[SYNONYMOUS_CODING(LOW|SILENT|gtG/gtA|V220|545|ZnT63C|protein_coding|CODING|FBtr0330103|6|1);SYNONYMOUS_CODING(LOW|SILENT|gtG/gtA|V220|449|ZnT63C|protein_coding|CODING|FBtr0330104|5|1);SYNONYMOUS_CODING(LOW|SILENT|gtG/gtA|V220|449|ZnT63C|protein_coding|CODING|FBtr0073057|6|1);SYNONYMOUS_CODING(LOW|SILENT|gtG/gtA|V220|449|ZnT63C|prot…	(TF_binding_site|mE1_TFBS_cad|FBsf0000244136)
3R_23521234_SNP	T	C	0.07732	15	179	0.0490569	2.29917e-06	0.000132633	0.0237124	C	FBgn0263025	CG43320	SYNONYMOUS_CODING	0	FBgn0263597	Acp98AB	DOWNSTREAM	461	SiteClass[FBgn0263025|CG43320|SYNONYMOUS_CODING|0;FBgn0263597|Acp98AB|DOWNSTREAM|461;FBgn0086346|ALiX|DOWNSTREAM|954;FBgn0263024|CG43319|DOWNSTREAM|971],TranscriptAnnot[SYNONYMOUS_CODING(LOW|SILENT|gtC/gtT|V86|398|CG43320|protein_coding|CODING|FBtr0306924|1|1);DOWNSTREAM(MODIFIER||971||57|CG43319|protein_coding|CODING|FBtr0306923||1);DOWNSTREAM(MODIFIER||461||25|Acp98AB|protein_coding|CODING|FBtr…	(TF_binding_site|mE1_TFBS_sens|FBsf0000233811)
2L_4957860_SNP	T	C	0.1244	24	169	0.0604665	2.39274e-06	0.000170301	0.0189237	C	FBgn0031655	Marcal1	SYNONYMOUS_CODING	0	FBgn0083960	CG34124	UPSTREAM	551	SiteClass[FBgn0031655|Marcal1|SYNONYMOUS_CODING|0;FBgn0083960|CG34124|UPSTREAM|551],TranscriptAnnot[SYNONYMOUS_CODING(LOW|SILENT|Ctg/Ttg|L656|755|Marcal1|protein_coding|CODING|FBtr0078992|6|1);UPSTREAM(MODIFIER||551||2003|CG34124|protein_coding|CODING|FBtr0110838||1)]	-
3R_26085875_DEL	A	AGCCCTCACCCTCTGA	0.1269	25	172	0.00453787	2.67511e-06	1.30854e-05	0.172628	AGCCCTCACCCTCTGA	INTERGENIC		INTERGENIC						SiteClass[|||],TranscriptAnnot[INTERGENIC(MODIFIER||||||||||1)]	-
2R_17181037_SNP	T	A	0.1647	28	142	0.0179544	2.98468e-06	5.2062e-05	0.0696965	A	FBgn0050390	Sgf29	UPSTREAM	91	FBgn0016726	RpL29	UPSTREAM	236	SiteClass[FBgn0050390|Sgf29|UPSTREAM|91;FBgn0016726|RpL29|UPSTREAM|236;FBgn0034614|CG9752|DOWNSTREAM|870],TranscriptAnnot[UTR_5_PRIME(MODIFIER||173||289|Sgf29|protein_coding|CODING|FBtr0342888|1|1);UPSTREAM(MODIFIER||236||76|RpL29|protein_coding|CODING|FBtr0071592||1);UPSTREAM(MODIFIER||236||76|RpL29|protein_coding|CODING|FBtr0071593||1);UPSTREAM(MODIFIER||236||76|RpL29|protein_coding|CODING|FBtr…	(TF_binding_site|BDTNP1_TFBS_dl|FBsf0000303655);(TF_binding_site|BDTNP1_TFBS_Med|FBsf0000281130);(TF_binding_site|BDTNP1_TFBS_slp1|FBsf0000272286);(TF_binding_site|BDTNP1_TFBS_z|FBsf0000196762);(TF_binding_site|mE1_TFBS_HSA|FBsf0000359013)
2L_4957790_SNP	C	T	0.1276	25	171	0.140382	3.09572e-06	0.000510629	0.00664229	T	FBgn0031655	Marcal1	SYNONYMOUS_CODING	0	FBgn0083960	CG34124	UPSTREAM	621	SiteClass[FBgn0031655|Marcal1|SYNONYMOUS_CODING|0;FBgn0083960|CG34124|UPSTREAM|621],TranscriptAnnot[SYNONYMOUS_CODING(LOW|SILENT|ggT/ggC|G632|755|Marcal1|protein_coding|CODING|FBtr0078992|6|1);UPSTREAM(MODIFIER||621||2003|CG34124|protein_coding|CODING|FBtr0110838||1)]	-
3R_24084181_SNP	G	A	0.3408	61	118	0.00857663	3.34614e-06	2.66919e-05	0.125452	A	INTERGENIC		INTERGENIC						SiteClass[|||],TranscriptAnnot[INTERGENIC(MODIFIER||||||||||1)]	-
X_4036785_SNP	C	T	0.1327	26	170	0.00327864	3.83253e-06	1.17091e-05	0.230192	T	FBgn0000635	Fas2	SYNONYMOUS_CODING	0					SiteClass[FBgn0000635|Fas2|SYNONYMOUS_CODING|0],TranscriptAnnot[SYNONYMOUS_CODING(LOW|SILENT|tcA/tcG|S441|811|Fas2|protein_coding|CODING|FBtr0070667|6|1);SYNONYMOUS_CODING(LOW|SILENT|tcA/tcG|S441|873|Fas2|protein_coding|CODING|FBtr0070665|6|1);SYNONYMOUS_CODING(LOW|SILENT|tcA/tcG|S441|773|Fas2|protein_coding|CODING|FBtr0070666|6|1);SYNONYMOUS_CODING(LOW|SILENT|tcA/tcG|S456|859|Fas2|protein_coding…	(TF_binding_site|mE1_TFBS_sens|FBsf0000219502)
X_2615539_SNP	C	A	0.05556	11	187	0.0462344	4.10374e-06	0.000161247	0.0328896	A	FBgn0000928	fs_1_Yb	NON_SYNONYMOUS_CODING	0					SiteClass[FBgn0000928|fs_1_Yb|NON_SYNONYMOUS_CODING|0],TranscriptAnnot[NON_SYNONYMOUS_CODING(MODERATE|MISSENSE|Aaa/Caa|K294Q|1042|fs_1_Yb|protein_coding|CODING|FBtr0070484|2|1)]	(TF_binding_site|BDTNP1_TFBS_twi|FBsf0000204934);(TF_binding_site|mE1_TFBS_cad|FBsf0000242778);(TF_binding_site|mE1_TFBS_chinmo|FBsf0000208232)
2R_12392094_INS	CACCCCCCA	C	0.1436	27	161	0.216086	4.25422e-06	0.0010037	0.00370536	C	FBgn0011260	Sema-2a	INTRON	0					SiteClass[FBgn0011260|Sema-2a|INTRON|0],TranscriptAnnot[INTRON(MODIFIER||||697|Sema-2a|protein_coding|CODING|FBtr0087088|2|1)]	-
2R_16367149_SNP	A	T	0.1875	36	156	0.248467	4.52102e-06	0.00123684	0.00290897	T	FBgn0086604	CG12484	DOWNSTREAM	693					SiteClass[FBgn0086604|CG12484|DOWNSTREAM|693],TranscriptAnnot[DOWNSTREAM(MODIFIER||693||1201|CG12484|protein_coding|CODING|FBtr0112775||1);DOWNSTREAM(MODIFIER||693||1194|CG12484|protein_coding|CODING|FBtr0273284||1);DOWNSTREAM(MODIFIER||693||1142|CG12484|protein_coding|CODING|FBtr0342690||1);INTERGENIC(MODIFIER||||||||||1)]	-
2R_15203629_SNP	T	A	0.172	32	154	0.0806441	4.62936e-06	0.000314383	0.0181714	A	FBgn0264753	Rgk1	INTRON	0					SiteClass[FBgn0264753|Rgk1|INTRON|0],TranscriptAnnot[INTRON(MODIFIER||||514|Rgk1|protein_coding|CODING|FBtr0334284|6|1);INTRON(MODIFIER||||498|Rgk1|protein_coding|CODING|FBtr0334282|5|1);INTRON(MODIFIER||||1379|Rgk1|protein_coding|CODING|FBtr0334283|12|1)]	-
3L_14373121_SNP	C	A	0.25	48	144	0.0269375	5.16496e-06	0.000101839	0.0613892	A	INTERGENIC		INTERGENIC						SiteClass[|||],TranscriptAnnot[INTERGENIC(MODIFIER||||||||||1)]	-
2R_6150269_SNP	T	A	0.2169	41	148	0.152645	5.37998e-06	0.000710587	0.0078279	A	FBgn0050009	CR30009	EXON	0					SiteClass[FBgn0050009|CR30009|EXON|0],TranscriptAnnot[EXON(MODIFIER|||||CR30009|ncRNA|NON_CODING|FBtr0088361|2|1);EXON(MODIFIER|||||CR30009|ncRNA|NON_CODING|FBtr0303450|2|1)]	-
3L_5055565_INS	CGCCCACAATTCAATGGC	C	0.05848	10	161	0.000234559	5.67406e-06	1.54012e-06	0.680557	C	FBgn0005775	Con	INTRON	0					SiteClass[FBgn0005775|Con|INTRON|0],TranscriptAnnot[INTRON(MODIFIER||||691|Con|protein_coding|CODING|FBtr0309972|2|1)]	-
3R_3482868_SNP	T	A	0.1517	27	151	0.0756495	5.71509e-06	0.000320682	0.0218162	A	INTERGENIC		INTERGENIC						SiteClass[|||],TranscriptAnnot[INTERGENIC(MODIFIER||||||||||1)]	-
2R_14086294_SNP	A	G	0.4339	82	107	0.0358854	5.80728e-06	0.000144553	0.0494817	G	INTERGENIC		INTERGENIC						SiteClass[|||],TranscriptAnnot[INTERGENIC(MODIFIER||||||||||1)]	-
3R_23642266_SNP	A	T	0.05612	11	185	0.313068	6.03549e-06	0.00189624	0.00210468	T	FBgn0085382	CG34353	INTRON	0					SiteClass[FBgn0085382|CG34353|INTRON|0],TranscriptAnnot[INTRON(MODIFIER||||566|CG34353|protein_coding|CODING|FBtr0112563|3|1);INTRON(MODIFIER||||566|CG34353|protein_coding|CODING|FBtr0305292|3|1);INTRON(MODIFIER||||581|CG34353|protein_coding|CODING|FBtr0339321|3|1)]	-
3L_4210588_SNP	T	A	0.1865	36	157	0.0540798	6.19904e-06	0.000229947	0.033463	A	FBgn0263110	CG43367	INTRON	0	FBgn0035511	Cpr64Ab	DOWNSTREAM	292	SiteClass[FBgn0263110|CG43367|INTRON|0;FBgn0035511|Cpr64Ab|DOWNSTREAM|292],TranscriptAnnot[DOWNSTREAM(MODIFIER||292||120|Cpr64Ab|protein_coding|CODING|FBtr0073253||1);INTRON(MODIFIER||||2754|CG43367|protein_coding|CODING|FBtr0307309|16|1);INTRON(MODIFIER||||2712|CG43367|protein_coding|CODING|FBtr0307310|15|1);INTRON(MODIFIER||||2554|CG43367|protein_coding|CODING|FBtr0307311|15|1);INTRON(MODIFIER|…	-
X_11897616_SNP	T	A	0.1156	23	176	0.0156588	6.63182e-06	6.68871e-05	0.105152	A	FBgn0001083	fw	INTRON	0					SiteClass[FBgn0001083|fw|INTRON|0],TranscriptAnnot[INTRON(MODIFIER||||1174|fw|protein_coding|CODING|FBtr0073580|1|1)]	(TF_binding_site|BDTNP1_TFBS_dl|FBsf0000318525);(TF_binding_site|mE1_TFBS_HSA|FBsf0000381722)
2L_17238987_SNP	G	A	0.2703	50	135	0.0104893	7.25317e-06	4.76042e-05	0.143754	A	FBgn0032629	beat-IIIc	INTRON	0					SiteClass[FBgn0032629|beat-IIIc|INTRON|0],TranscriptAnnot[INTRON(MODIFIER||||383|beat-IIIc|protein_coding|CODING|FBtr0080971|2|1);INTRON(MODIFIER||||361|beat-IIIc|protein_coding|CODING|FBtr0080972|2|1)]	-
2R_17181180_SNP	A	G	0.1443	28	166	0.197909	7.60507e-06	0.00113081	0.0060993	G	FBgn0050390	Sgf29	UPSTREAM	29	FBgn0016726	RpL29	UPSTREAM	93	SiteClass[FBgn0050390|Sgf29|UPSTREAM|29;FBgn0016726|RpL29|UPSTREAM|93;FBgn0034614|CG9752|DOWNSTREAM|727],TranscriptAnnot[UPSTREAM(MODIFIER||93||76|RpL29|protein_coding|CODING|FBtr0071592||1);UPSTREAM(MODIFIER||93||76|RpL29|protein_coding|CODING|FBtr0071593||1);UPSTREAM(MODIFIER||93||76|RpL29|protein_coding|CODING|FBtr0305669||1);UPSTREAM(MODIFIER||234||289|Sgf29|protein_coding|CODING|FBtr0071617|…	(TF_binding_site|BDTNP1_TFBS_dl|FBsf0000303655);(TF_binding_site|BDTNP1_TFBS_Med|FBsf0000281130);(TF_binding_site|BDTNP1_TFBS_slp1|FBsf0000272286);(TF_binding_site|BDTNP1_TFBS_z|FBsf0000196762);(TF_binding_site|mE1_TFBS_HSA|FBsf0000359013)
3R_13309370_SNP	T	C	0.07179	14	181	0.062789	8.02157e-06	0.00030343	0.0319241	C	FBgn0261046	Dscam3	INTRON	0					SiteClass[FBgn0261046|Dscam3|INTRON|0],TranscriptAnnot[INTRON(MODIFIER||||2007|Dscam3|protein_coding|CODING|FBtr0113397|18|1);INTRON(MODIFIER||||1006|Dscam3|protein_coding|CODING|FBtr0113398|18|1);INTRON(MODIFIER||||2087|Dscam3|protein_coding|CODING|FBtr0330211|18|1);INTRON(MODIFIER||||2077|Dscam3|protein_coding|CODING|FBtr0330212|18|1)]	-
2R_12384712_SNP	G	A	0.1475	27	156	0.0162877	8.39992e-06	7.80263e-05	0.111548	G	FBgn0034133	CG7813	SYNONYMOUS_CODING	0					SiteClass[FBgn0034133|CG7813|SYNONYMOUS_CODING|0],TranscriptAnnot[SYNONYMOUS_CODING(LOW|SILENT|gcC/gcT|A659|734|CG7813|protein_coding|CODING|FBtr0087126|2|1)]	-
3L_7191255_SNP	C	A	0.2143	42	154	0.158415	8.62975e-06	0.000903689	0.00954387	A	INTERGENIC		INTERGENIC						SiteClass[|||],TranscriptAnnot[INTERGENIC(MODIFIER||||||||||1)]	-
2R_16368501_INS	CC	C	0.1222	22	158	0.232623	8.76075e-06	0.00147174	0.0049095	C	INTERGENIC		INTERGENIC						SiteClass[|||],TranscriptAnnot[INTERGENIC(MODIFIER||||||||||1)]	-
2L_13326271_SNP	G	C	0.2784	49	127	0.50009	8.84129e-06	0.00434647	0.000798289	G	FBgn0264308	CG43778	INTRON	0					SiteClass[FBgn0264308|CG43778|INTRON|0],TranscriptAnnot[INTRON(MODIFIER||||963|CG43778|protein_coding|CODING|FBtr0331503|1|1);INTRON(MODIFIER||||663|CG43778|protein_coding|CODING|FBtr0331504|1|1);INTRON(MODIFIER||||451|CG43778|protein_coding|CODING|FBtr0331505|1|1)]	-
3L_12656751_SNP	A	C	0.05528	11	188	0.0530709	8.95721e-06	0.000266171	0.0403539	C	INTERGENIC		INTERGENIC						SiteClass[|||],TranscriptAnnot[INTERGENIC(MODIFIER||||||||||1)]	-
2L_17350223_SNP	C	G	0.07407	14	175	0.0263591	9.14263e-06	0.000130589	0.0788594	G	INTERGENIC		INTERGENIC						SiteClass[|||],TranscriptAnnot[INTERGENIC(MODIFIER||||||||||1)]	-
2R_16484000_SNP	C	T	0.1031	20	174	0.0308034	9.15898e-06	0.000152908	0.0689735	T	FBgn0015907	bl	INTRON	0					SiteClass[FBgn0015907|bl|INTRON|0],TranscriptAnnot[INTRON(MODIFIER||||496|bl|protein_coding|CODING|FBtr0086220|3|1);INTRON(MODIFIER||||502|bl|protein_coding|CODING|FBtr0086221|4|1);INTRON(MODIFIER||||493|bl|protein_coding|CODING|FBtr0301760|3|1);INTRON(MODIFIER||||496|bl|protein_coding|CODING|FBtr0336730|3|1);INTRON(MODIFIER||||413|bl|protein_coding|CODING|FBtr0086219|3|1)]	(TF_binding_site|BDTNP1_TFBS_dl|FBsf0000303454);(TF_binding_site|BDTNP1_TFBS_Med|FBsf0000281035);(TF_binding_site|mE1_TFBS_HSA|FBsf0000358751);(TF_binding_site|mE1_TFBS_HSA|FBsf0000358752);(TF_binding_site|mE1_TFBS_Trl|FBsf0000338968)
2R_16129757_SNP	C	T	0.4947	94	96	0.00838777	9.21994e-06	4.3596e-05	0.179764	T	FBgn0034487	Efhc1.2	SYNONYMOUS_CODING	0	FBgn0034488	CG11208	DOWNSTREAM	500	SiteClass[FBgn0034487|Efhc1.2|SYNONYMOUS_CODING|0;FBgn0034488|CG11208|DOWNSTREAM|500],TranscriptAnnot[SYNONYMOUS_CODING(LOW|SILENT|Ttg/Ctg|L594|765|Efhc1.2|protein_coding|CODING|FBtr0086316|5|1);DOWNSTREAM(MODIFIER||500||568|CG11208|protein_coding|CODING|FBtr0086322||1)]	(TF_binding_site|mE1_TFBS_cad|FBsf0000247069)
3L_4210489_SNP	T	C	0.1929	38	159	0.0399402	9.47804e-06	0.000202725	0.0550828	C	FBgn0263110	CG43367	INTRON	0	FBgn0035511	Cpr64Ab	DOWNSTREAM	391	SiteClass[FBgn0263110|CG43367|INTRON|0;FBgn0035511|Cpr64Ab|DOWNSTREAM|391],TranscriptAnnot[DOWNSTREAM(MODIFIER||391||120|Cpr64Ab|protein_coding|CODING|FBtr0073253||1);INTRON(MODIFIER||||2754|CG43367|protein_coding|CODING|FBtr0307309|16|1);INTRON(MODIFIER||||2712|CG43367|protein_coding|CODING|FBtr0307310|15|1);INTRON(MODIFIER||||2554|CG43367|protein_coding|CODING|FBtr0307311|15|1);INTRON(MODIFIER|…	-
3L_6171991_SNP	A	G	0.1117	22	175	0.00110984	1.01057e-05	7.72636e-06	0.477492	G	FBgn0035690	CG10274	UTR_3_PRIME	0	FBgn0035689	CG7376	DOWNSTREAM	118	SiteClass[FBgn0035690|CG10274|UTR_3_PRIME|0;FBgn0035689|CG7376|DOWNSTREAM|118],TranscriptAnnot[UTR_3_PRIME(MODIFIER||247||1270|CG7376|protein_coding|CODING|FBtr0331788|10|1);UTR_3_PRIME(MODIFIER||166||863|CG10274|protein_coding|CODING|FBtr0113149|3|1);DOWNSTREAM(MODIFIER||118||1270|CG7376|protein_coding|CODING|FBtr0076998||1)]	-
2R_15204513_SNP	T	C	0.1827	36	161	0.027013	1.02662e-05	0.000141439	0.0809335	C	FBgn0264753	Rgk1	INTRON	0					SiteClass[FBgn0264753|Rgk1|INTRON|0],TranscriptAnnot[INTRON(MODIFIER||||498|Rgk1|protein_coding|CODING|FBtr0334282|5|1);INTRON(MODIFIER||||1379|Rgk1|protein_coding|CODING|FBtr0334283|12|1);INTRON(MODIFIER||||514|Rgk1|protein_coding|CODING|FBtr0334284|5|1)]	-
3L_6173428_SNP	G	A	0.1608	32	167	0.0116414	1.06276e-05	6.36335e-05	0.153436	A	FBgn0035690	CG10274	SYNONYMOUS_CODING	0					SiteClass[FBgn0035690|CG10274|SYNONYMOUS_CODING|0],TranscriptAnnot[SYNONYMOUS_CODING(LOW|SILENT|aaT/aaC|N462|863|CG10274|protein_coding|CODING|FBtr0113149|2|1)]	(TF_binding_site|BDTNP1_TFBS_da|FBsf0000326219);(TF_binding_site|BDTNP1_TFBS_twi|FBsf0000203057);(TF_binding_site|mE1_TFBS_chinmo|FBsf0000209848);(TF_binding_site|mE1_TFBS_sens|FBsf0000223181)
2L_4957969_SNP	A	T	0.1077	21	174	0.0760523	1.10676e-05	0.000431705	0.0297794	T	FBgn0031655	Marcal1	INTRON	0	FBgn0083960	CG34124	UPSTREAM	442	SiteClass[FBgn0031655|Marcal1|INTRON|0;FBgn0083960|CG34124|UPSTREAM|442],TranscriptAnnot[UPSTREAM(MODIFIER||442||2003|CG34124|protein_coding|CODING|FBtr0110838||1);INTRON(MODIFIER||||755|Marcal1|protein_coding|CODING|FBtr0078992|6|1)]	-
2R_17181392_SNP	A	T	0.1503	29	164	0.0900647	1.13942e-05	0.000527286	0.0245796	T	FBgn0016726	RpL29	INTRON	0	FBgn0050390	Sgf29	UPSTREAM	241	SiteClass[FBgn0016726|RpL29|INTRON|0;FBgn0050390|Sgf29|UPSTREAM|241;FBgn0034614|CG9752|DOWNSTREAM|515],TranscriptAnnot[UPSTREAM(MODIFIER||446||289|Sgf29|protein_coding|CODING|FBtr0071617||1);UPSTREAM(MODIFIER||241||289|Sgf29|protein_coding|CODING|FBtr0342888||1);DOWNSTREAM(MODIFIER||515||343|CG9752|protein_coding|CODING|FBtr0071616||1);INTRON(MODIFIER||||76|RpL29|protein_coding|CODING|FBtr0305669…	(TF_binding_site|BDTNP1_TFBS_dl|FBsf0000303655);(TF_binding_site|BDTNP1_TFBS_Med|FBsf0000281131);(TF_binding_site|BDTNP1_TFBS_slp1|FBsf0000272286);(TF_binding_site|BDTNP1_TFBS_z|FBsf0000196762);(TF_binding_site|mE1_TFBS_HSA|FBsf0000359013)
3L_6693257_SNP	G	A	0.1526	29	161	0.0126983	1.14753e-05	7.178e-05	0.148825	A	FBgn0035710	SP1173	INTRON	0					SiteClass[FBgn0035710|SP1173|INTRON|0],TranscriptAnnot[INTRON(MODIFIER||||741|SP1173|protein_coding|CODING|FBtr0076958|2|1);INTRON(MODIFIER||||741|SP1173|protein_coding|CODING|FBtr0076959|1|1);INTRON(MODIFIER||||741|SP1173|protein_coding|CODING|FBtr0076960|1|1)]	-
3R_10776114_SNP	G	C	0.06633	13	183	0.0733951	1.19789e-05	0.000430109	0.0322379	C	INTERGENIC		INTERGENIC						SiteClass[|||],TranscriptAnnot[INTERGENIC(MODIFIER||||||||||1)]	-
2R_14688845_SNP	A	T	0.05025	10	189	0.0193524	1.20534e-05	0.000110072	0.112388	T	FBgn0010651	l_2_08717	INTRON	0					SiteClass[FBgn0010651|l_2_08717|INTRON|0],TranscriptAnnot[INTRON(MODIFIER||||497|l_2_08717|protein_coding|CODING|FBtr0086634|2|1);INTRON(MODIFIER||||497|l_2_08717|protein_coding|CODING|FBtr0086635|1|1);INTRON(MODIFIER||||497|l_2_08717|protein_coding|CODING|FBtr0345426|1|1)]	(TF_binding_site|BDTNP1_TFBS_da|FBsf0000324720);(TF_binding_site|BDTNP1_TFBS_dl|FBsf0000303133);(TF_binding_site|BDTNP1_TFBS_twi|FBsf0000199787);(TF_binding_site|mE1_TFBS_HSA|FBsf0000358231);(TF_binding_site|mE1_TFBS_Trl|FBsf0000338881)
3L_7191206_SNP	A	G	0.206	41	158	0.0612391	1.20923e-05	0.000355255	0.0396825	G	INTERGENIC		INTERGENIC						SiteClass[|||],TranscriptAnnot[INTERGENIC(MODIFIER||||||||||1)]	-
2L_16731019_SNP	A	G	0.05155	10	184	0.00953781	1.23243e-05	5.69458e-05	0.183239	G	FBgn0032595	CG17996	UTR_5_PRIME	0	FBgn0051812	CG31812	UTR_3_PRIME	0	SiteClass[FBgn0032595|CG17996|UTR_5_PRIME|0;FBgn0051812|CG31812|UTR_3_PRIME|0;FBgn0032596|Prosbeta4|DOWNSTREAM|161],TranscriptAnnot[UTR_5_PRIME(MODIFIER||59||118|CG17996|protein_coding|CODING|FBtr0080937|1|1);UTR_3_PRIME(MODIFIER||486||233|CG31812|protein_coding|CODING|FBtr0290062|2|1);DOWNSTREAM(MODIFIER||161||201|Prosbeta4|protein_coding|CODING|FBtr0335142||1);DOWNSTREAM(MODIFIER||202||201|Pros…	(TF_binding_site|mE1_TFBS_ttk|FBsf0000335352)
2L_20376373_SNP	A	T	0.2079	37	141	0.0471381	1.23926e-05	0.00027258	0.052656	T	FBgn0032856	CG16798	DOWNSTREAM	608					SiteClass[FBgn0032856|CG16798|DOWNSTREAM|608],TranscriptAnnot[DOWNSTREAM(MODIFIER||608||561|CG16798|protein_coding|CODING|FBtr0081371||1);INTERGENIC(MODIFIER||||||||||1)]	-
2L_20382103_SNP	T	G	0.0914	17	169	0.475657	1.28927e-05	0.00461492	0.00119712	G	FBgn0032856	CG16798	UTR_5_PRIME	0					SiteClass[FBgn0032856|CG16798|UTR_5_PRIME|0],TranscriptAnnot[UTR_5_PRIME(MODIFIER||171||561|CG16798|protein_coding|CODING|FBtr0081371|1|1)]	-
3L_6173656_SNP	A	G	0.08081	16	182	0.00291542	1.29291e-05	2.01965e-05	0.345935	G	FBgn0035690	CG10274	SYNONYMOUS_CODING	0					SiteClass[FBgn0035690|CG10274|SYNONYMOUS_CODING|0],TranscriptAnnot[SYNONYMOUS_CODING(LOW|SILENT|taC/taT|Y386|863|CG10274|protein_coding|CODING|FBtr0113149|2|1)]	(TF_binding_site|BDTNP1_TFBS_da|FBsf0000326219);(TF_binding_site|BDTNP1_TFBS_twi|FBsf0000203057);(TF_binding_site|mE1_TFBS_chinmo|FBsf0000209848);(TF_binding_site|mE1_TFBS_HSA|FBsf0000362605);(TF_binding_site|mE1_TFBS_sens|FBsf0000223181)
2R_18531348_SNP	A	T	0.07035	14	185	0.247608	1.31081e-05	0.00187299	0.00552488	T	FBgn0040091	Ugt58Fa	START_GAINED	0	FBgn0034753	CG2852	DOWNSTREAM	803	SiteClass[FBgn0040091|Ugt58Fa|START_GAINED|0;FBgn0034753|CG2852|DOWNSTREAM|803],TranscriptAnnot[START_GAINED(LOW||||529|Ugt58Fa|protein_coding|CODING|FBtr0071934|1|1);START_GAINED(LOW||||529|Ugt58Fa|protein_coding|CODING|FBtr0345505|1|1);UTR_5_PRIME(MODIFIER||36||529|Ugt58Fa|protein_coding|CODING|FBtr0071934|1|1);UTR_5_PRIME(MODIFIER||36||529|Ugt58Fa|protein_coding|CODING|FBtr0345505|1|1);DOWNSTR…	(TF_binding_site|mE1_TFBS_sens|FBsf0000229450)
2R_7778024_SNP	A	C	0.1746	33	156	0.00434776	1.34098e-05	2.92383e-05	0.289927	C	FBgn0033663	ERp60	INTRON	0	FBgn0000556	Ef1alpha48D	UPSTREAM	616	SiteClass[FBgn0033663|ERp60|INTRON|0;FBgn0000556|Ef1alpha48D|UPSTREAM|616],TranscriptAnnot[UPSTREAM(MODIFIER||616||463|Ef1alpha48D|protein_coding|CODING|FBtr0345023||1);UPSTREAM(MODIFIER||877||463|Ef1alpha48D|protein_coding|CODING|FBtr0331927||1);INTRON(MODIFIER||||489|ERp60|protein_coding|CODING|FBtr0088058|1|1)]	(TF_binding_site|BDTNP1_TFBS_dl|FBsf0000301524);(TF_binding_site|mE1_TFBS_cad|FBsf0000246402);(TF_binding_site|mE1_TFBS_HSA|FBsf0000355804);(TF_binding_site|mE1_TFBS_sens|FBsf0000227484)
2L_11914490_SNP	G	T	0.07538	15	184	0.139763	1.41385e-05	0.000956606	0.0151007	T	FBgn0264815	Pde1c	INTRON	0					SiteClass[FBgn0264815|Pde1c|INTRON|0],TranscriptAnnot[INTRON(MODIFIER||||834|Pde1c|protein_coding|CODING|FBtr0334136|2|1);INTRON(MODIFIER||||834|Pde1c|protein_coding|CODING|FBtr0334140|2|1)]	-
3L_2359507_SNP	A	G	0.05025	10	189	0.0108848	1.45052e-05	6.9934e-05	0.178459	G	INTERGENIC		INTERGENIC						SiteClass[|||],TranscriptAnnot[INTERGENIC(MODIFIER||||||||||1)]	-
3L_11897236_SNP	A	C	0.3627	70	123	0.0523567	1.47502e-05	0.000329535	0.0511872	C	FBgn0266100	CG44837	INTRON	0					SiteClass[FBgn0266100|CG44837|INTRON|0],TranscriptAnnot[INTRON(MODIFIER||||964|CG44837|protein_coding|CODING|FBtr0343552|2|1)]	-
3R_16764410_SNP	A	T	0.06122	12	184	0.0993688	1.51918e-05	0.000667443	0.0250243	T	FBgn0051191	CG31191	INTRON	0					SiteClass[FBgn0051191|CG31191|INTRON|0],TranscriptAnnot[INTRON(MODIFIER||||255|CG31191|protein_coding|CODING|FBtr0083984|1|1);INTRON(MODIFIER||||495|CG31191|protein_coding|CODING|FBtr0344322|1|1)]	-
3L_3315777_SNP	A	T	0.07614	15	182	0.479716	1.57292e-05	0.00502676	0.00133895	T	FBgn0052282	Drsl4	SYNONYMOUS_CODING	0	FBgn0052283	Drsl3	DOWNSTREAM	422	SiteClass[FBgn0052282|Drsl4|SYNONYMOUS_CODING|0;FBgn0052283|Drsl3|DOWNSTREAM|422],TranscriptAnnot[SYNONYMOUS_CODING(LOW|SILENT|cgT/cgA|R47|71|Drsl4|protein_coding|CODING|FBtr0073061|1|1);DOWNSTREAM(MODIFIER||422||71|Drsl3|protein_coding|CODING|FBtr0073060||1)]	(TF_binding_site|BDTNP1_TFBS_dl|FBsf0000305367);(TF_binding_site|mE1_TFBS_HSA|FBsf0000361768);(TF_binding_site|mE1_TFBS_HSA|FBsf0000361769)
X_3705025_SNP	C	T	0.1087	20	164	0.00681193	1.58018e-05	4.76075e-05	0.241547	T	FBgn0264954	fd3F	UTR_3_PRIME	0	FBgn0000542	ec	UPSTREAM	706	SiteClass[FBgn0264954|fd3F|UTR_3_PRIME|0;FBgn0000542|ec|UPSTREAM|706],TranscriptAnnot[UTR_3_PRIME(MODIFIER||483||744|fd3F|protein_coding|CODING|FBtr0335187|5|1);UPSTREAM(MODIFIER||706||1746|ec|protein_coding|CODING|FBtr0112801||1)]	(TF_binding_site|BDTNP1_TFBS_dl|FBsf0000316410);(TF_binding_site|mE1_TFBS_bab1|FBsf0000214934);(TF_binding_site|mE1_TFBS_HSA|FBsf0000378962);(TF_binding_site|mE1_TFBS_Trl|FBsf0000342333);(TF_binding_site|mE1_TFBS_Ubx|FBsf0000262032)
X_10077432_INS	AC	A	0.06977	12	160	0.113222	1.6015e-05	0.000791195	0.0216637	A	FBgn0264503	CG43902	INTRON	0	FBgn0266199	CR44894	INTRON	0	SiteClass[FBgn0264503|CG43902|INTRON|0;FBgn0266199|CR44894|INTRON|0],TranscriptAnnot[INTRON(MODIFIER||||1220|CG43902|protein_coding|CODING|FBtr0332934|1|1);INTRON(MODIFIER|||||CR44894|ncRNA|NON_CODING|FBtr0343795|1|1);INTRON(MODIFIER|||||CR44894|ncRNA|NON_CODING|FBtr0343796|1|1)]	-
2R_3798994_SNP	T	C	0.2251	43	148	0.144267	1.61416e-05	0.00105008	0.0154619	T	FBgn0050377	CG30377	INTRON	0					SiteClass[FBgn0050377|CG30377|INTRON|0],TranscriptAnnot[INTRON(MODIFIER||||897|CG30377|protein_coding|CODING|FBtr0088844|4|1);INTRON(MODIFIER||||897|CG30377|protein_coding|CODING|FBtr0339121|3|1)]	-
2L_13287341_SNP	T	G	0.1237	24	170	0.0744997	1.62237e-05	0.000500577	0.0365851	G	FBgn0032499	Uvrag	INTRON	0	FBgn0264892	CR44083	DOWNSTREAM	803	SiteClass[FBgn0032499|Uvrag|INTRON|0;FBgn0264892|CR44083|DOWNSTREAM|803;FBgn0028406|Drep-4|UPSTREAM|879;FBgn0266307|CR44972|DOWNSTREAM|961],TranscriptAnnot[UPSTREAM(MODIFIER||879||450|Drep-4|protein_coding|CODING|FBtr0080478||1);DOWNSTREAM(MODIFIER||803|||CR44083|ncRNA|NON_CODING|FBtr0334864||1);DOWNSTREAM(MODIFIER||961|||CR44972|ncRNA|NON_CODING|FBtr0344036||1);INTRON(MODIFIER||||696|Uvrag|prote…	(TF_binding_site|mE1_TFBS_HSA|FBsf0000350771);(TF_binding_site|mE1_TFBS_sens|FBsf0000217531)
X_8833752_INS	TA	T	0.2256	44	151	0.172898	1.64504e-05	0.00131266	0.0118219	T	FBgn0261549	rdgA	INTRON	0					SiteClass[FBgn0261549|rdgA|INTRON|0],TranscriptAnnot[INTRON(MODIFIER||||1024|rdgA|protein_coding|CODING|FBtr0302662|3|1);INTRON(MODIFIER||||1027|rdgA|protein_coding|CODING|FBtr0302661|2|1);INTRON(MODIFIER||||1009|rdgA|protein_coding|CODING|FBtr0302663|3|1);INTRON(MODIFIER||||991|rdgA|protein_coding|CODING|FBtr0302664|3|1);INTRON(MODIFIER||||1457|rdgA|protein_coding|CODING|FBtr0302660|1|1);INTRON(…	-
2R_14810031_SNP	C	G	0.1202	22	161	0.00688824	1.69378e-05	4.9865e-05	0.245419	G	FBgn0034408	sano	INTRON	0					SiteClass[FBgn0034408|sano|INTRON|0],TranscriptAnnot[INTRON(MODIFIER||||778|sano|protein_coding|CODING|FBtr0086566|4|1);INTRON(MODIFIER||||778|sano|protein_coding|CODING|FBtr0086567|3|1);INTRON(MODIFIER||||778|sano|protein_coding|CODING|FBtr0290300|3|1)]	(TF_binding_site|mE1_TFBS_HSA|FBsf0000358266);(TF_binding_site|mE1_TFBS_sbb|FBsf0000251340)
2L_6116919_SNP	T	A	0.3889	70	110	0.152659	1.71049e-05	0.00115012	0.0146562	A	FBgn0266521	stai	INTRON	0					SiteClass[FBgn0266521|stai|INTRON|0],TranscriptAnnot[INTRON(MODIFIER||||257|stai|protein_coding|CODING|FBtr0079196|2|1);INTRON(MODIFIER||||302|stai|protein_coding|CODING|FBtr0079197|2|1);INTRON(MODIFIER||||250|stai|protein_coding|CODING|FBtr0079198|2|1);INTRON(MODIFIER||||302|stai|protein_coding|CODING|FBtr0333406|4|1)]	-
2L_8391099_SNP	A	G	0.4108	76	109	0.55583	1.72654e-05	0.00652041	0.000923901	A	FBgn0262002	CG42820	SYNONYMOUS_CODING	0					SiteClass[FBgn0262002|CG42820|SYNONYMOUS_CODING|0],TranscriptAnnot[SYNONYMOUS_CODING(LOW|SILENT|ggT/ggC|G352|689|CG42820|protein_coding|CODING|FBtr0303799|3|1)]	-
2L_10115005_SNP	G	A	0.08763	17	177	0.0396334	1.73389e-05	0.000266702	0.0717949	A	FBgn0265002	CG44153	INTRON	0	FBgn0083945	CG34109	INTRON	0	SiteClass[FBgn0265002|CG44153|INTRON|0;FBgn0083945|CG34109|INTRON|0],TranscriptAnnot[INTRON(MODIFIER||||1946|CG44153|protein_coding|CODING|FBtr0335509|6|1);INTRON(MODIFIER||||1946|CG44153|protein_coding|CODING|FBtr0335510|6|1);INTRON(MODIFIER||||800|CG34109|protein_coding|CODING|FBtr0300423|9|1)]	-
3L_13859813_SNP	A	T	0.05528	11	188	0.032144	1.74106e-05	0.000216489	0.0865209	T	FBgn0036381	CG8745	UTR_5_PRIME	0	FBgn0264006	dysc	DOWNSTREAM	701	SiteClass[FBgn0036381|CG8745|UTR_5_PRIME|0;FBgn0264006|dysc|DOWNSTREAM|701],TranscriptAnnot[UTR_5_PRIME(MODIFIER||22||494|CG8745|protein_coding|CODING|FBtr0075801|1|1);DOWNSTREAM(MODIFIER||701||990|dysc|protein_coding|CODING|FBtr0330414||1);DOWNSTREAM(MODIFIER||701||866|dysc|protein_coding|CODING|FBtr0330417||1);DOWNSTREAM(MODIFIER||701||1254|dysc|protein_coding|CODING|FBtr0330418||1);DOWNSTREAM(…	(TF_binding_site|BDTNP1_TFBS_dl|FBsf0000307297)
3L_9801318_SNP	C	T	0.101	20	178	0.00918196	1.7687e-05	6.61799e-05	0.211554	T	FBgn0044328	CG32052	UTR_3_PRIME	0					SiteClass[FBgn0044328|CG32052|UTR_3_PRIME|0],TranscriptAnnot[UTR_3_PRIME(MODIFIER||228||509|CG32052|protein_coding|CODING|FBtr0332818|5|1)]	(TF_binding_site|BDTNP1_TFBS_twi|FBsf0000203353)
3L_6172021_SNP	T	G	0.1168	23	174	0.00397668	1.77672e-05	3.14305e-05	0.328543	G	FBgn0035690	CG10274	UTR_3_PRIME	0	FBgn0035689	CG7376	DOWNSTREAM	148	SiteClass[FBgn0035690|CG10274|UTR_3_PRIME|0;FBgn0035689|CG7376|DOWNSTREAM|148],TranscriptAnnot[UTR_3_PRIME(MODIFIER||277||1270|CG7376|protein_coding|CODING|FBtr0331788|10|1);UTR_3_PRIME(MODIFIER||136||863|CG10274|protein_coding|CODING|FBtr0113149|3|1);DOWNSTREAM(MODIFIER||148||1270|CG7376|protein_coding|CODING|FBtr0076998||1)]	-
2R_13396868_SNP	A	C	0.1179	23	172	0.16338	1.78337e-05	0.00126854	0.013511	C	FBgn0085222	CG34193	UPSTREAM	563	FBgn0262720	CG43164	DOWNSTREAM	718	SiteClass[FBgn0085222|CG34193|UPSTREAM|563;FBgn0262720|CG43164|DOWNSTREAM|718],TranscriptAnnot[UTR_5_PRIME(MODIFIER||620||77|CG34193|protein_coding|CODING|FBtr0345622|1|1);UPSTREAM(MODIFIER||563||77|CG34193|protein_coding|CODING|FBtr0112386||1);DOWNSTREAM(MODIFIER||718||194|CG43164|protein_coding|CODING|FBtr0305701||1);DOWNSTREAM(MODIFIER||718||193|CG43164|protein_coding|CODING|FBtr0305702||1);DO…	(TF_binding_site|mE1_TFBS_cnc|FBsf0000206390)
3L_19839755_SNP	C	G	0.1728	33	158	0.293638	1.78401e-05	0.00264369	0.00473435	G	FBgn0020389	Papss	INTRON	0					SiteClass[FBgn0020389|Papss|INTRON|0],TranscriptAnnot[UPSTREAM(MODIFIER||654||657|Papss|protein_coding|CODING|FBtr0074888||1);UPSTREAM(MODIFIER||654||630|Papss|protein_coding|CODING|FBtr0332147||1);INTRON(MODIFIER||||630|Papss|protein_coding|CODING|FBtr0111108|1|1);INTRON(MODIFIER||||629|Papss|protein_coding|CODING|FBtr0074885|2|1);INTRON(MODIFIER||||629|Papss|protein_coding|CODING|FBtr0074886|1|…	-
2L_10166340_SNP	T	G	0.05025	10	189	0.0174242	1.78448e-05	0.000120751	0.140491	G	FBgn0265002	CG44153	INTRON	0					SiteClass[FBgn0265002|CG44153|INTRON|0],TranscriptAnnot[INTRON(MODIFIER||||1946|CG44153|protein_coding|CODING|FBtr0335509|2|1);INTRON(MODIFIER||||1946|CG44153|protein_coding|CODING|FBtr0335510|2|1)]	-
3L_13830919_SNP	A	G	0.0796	16	185	0.0387366	1.80038e-05	0.000265251	0.0744776	G	FBgn0262813	CG43184	SYNONYMOUS_CODING	0					SiteClass[FBgn0262813|CG43184|SYNONYMOUS_CODING|0],TranscriptAnnot[SYNONYMOUS_CODING(LOW|SILENT|tcG/tcA|S6|81|CG43184|protein_coding|CODING|FBtr0306058|1|1)]	(TF_binding_site|BDTNP1_TFBS_bcd|FBsf0000333880);(TF_binding_site|BDTNP1_TFBS_dl|FBsf0000307294);(TF_binding_site|BDTNP1_TFBS_twi|FBsf0000203732);(TF_binding_site|mE1_TFBS_cad|FBsf0000244945);(TF_binding_site|mE1_TFBS_HSA|FBsf0000364974)
2L_7572675_SNP	G	T	0.1005	19	170	0.0189492	1.92897e-05	0.000135948	0.136219	T	FBgn0264895	RapGAP1	INTRON	0					SiteClass[FBgn0264895|RapGAP1|INTRON|0],TranscriptAnnot[INTRON(MODIFIER||||959|RapGAP1|protein_coding|CODING|FBtr0334849|1|1);INTRON(MODIFIER||||933|RapGAP1|protein_coding|CODING|FBtr0334850|1|1);INTRON(MODIFIER||||933|RapGAP1|protein_coding|CODING|FBtr0334846|1|1)]	-
3R_13380041_SNP	T	G	0.1323	25	164	0.0548886	1.9666e-05	0.000395144	0.0554799	G	INTERGENIC		INTERGENIC						SiteClass[|||],TranscriptAnnot[INTERGENIC(MODIFIER||||||||||1)]	-
X_8714145_SNP	T	A	0.1152	22	169	0.0554889	1.97987e-05	0.000400884	0.0550386	A	INTERGENIC		INTERGENIC						SiteClass[|||],TranscriptAnnot[INTERGENIC(MODIFIER||||||||||1)]	(TF_binding_site|BDTNP1_TFBS_twi|FBsf0000205517);(TF_binding_site|mE1_TFBS_HSA|FBsf0000380738)
2R_16663863_SNP	A	G	0.16	32	168	0.495849	2.004e-05	0.00577255	0.00144002	G	FBgn0263848	CG43709	SYNONYMOUS_CODING	0	FBgn0263849	CG43710	DOWNSTREAM	369	SiteClass[FBgn0263848|CG43709|SYNONYMOUS_CODING|0;FBgn0263849|CG43710|DOWNSTREAM|369;FBgn0034548|CG13443|DOWNSTREAM|994],TranscriptAnnot[SYNONYMOUS_CODING(LOW|SILENT|tcC/tcT|S3|154|CG43709|protein_coding|CODING|FBtr0321317|1|1);DOWNSTREAM(MODIFIER||994||436|CG13443|protein_coding|CODING|FBtr0086239||1);DOWNSTREAM(MODIFIER||369||340|CG43710|protein_coding|CODING|FBtr0321316||1)]	-
3L_14376180_SNP	T	C	0.1512	26	146	0.00577195	2.01028e-05	4.65995e-05	0.284115	C	FBgn0262580	CG43120	UTR_3_PRIME	0					SiteClass[FBgn0262580|CG43120|UTR_3_PRIME|0],TranscriptAnnot[UTR_3_PRIME(MODIFIER||138||286|CG43120|protein_coding|CODING|FBtr0304959|3|1)]	-
3R_18725159_DEL	A	AATAGTT	0.05584	11	186	0.306328	2.01633e-05	0.00293351	0.00467394	AATAGTT	FBgn0017590	klg	UTR_5_PRIME	0					SiteClass[FBgn0017590|klg|UTR_5_PRIME|0],TranscriptAnnot[UTR_5_PRIME(MODIFIER||15965||545|klg|protein_coding|CODING|FBtr0084337|1|1)]	(TF_binding_site|BDTNP1_TFBS_da|FBsf0000330208);(TF_binding_site|BDTNP1_TFBS_dl|FBsf0000313500);(TF_binding_site|BDTNP1_TFBS_Med|FBsf0000286255);(TF_binding_site|BDTNP1_TFBS_twi|FBsf0000265821);(TF_binding_site|mE1_TFBS_HSA|FBsf0000374286);(TF_binding_site|mE1_TFBS_Trl|FBsf0000341573)
3R_16764539_SNP	C	T	0.06186	12	182	0.218333	2.1017e-05	0.00193117	0.00917857	T	FBgn0051191	CG31191	INTRON	0					SiteClass[FBgn0051191|CG31191|INTRON|0],TranscriptAnnot[INTRON(MODIFIER||||255|CG31191|protein_coding|CODING|FBtr0083984|1|1);INTRON(MODIFIER||||495|CG31191|protein_coding|CODING|FBtr0344322|1|1)]	-
X_14213277_SNP	C	T	0.06952	13	174	0.0180209	2.11594e-05	0.000135694	0.146088	T	INTERGENIC		INTERGENIC						SiteClass[|||],TranscriptAnnot[INTERGENIC(MODIFIER||||||||||1)]	-
2R_5869114_INS	AAGTGGAG	A	0.288	55	136	0.021954	2.13303e-05	0.000164488	0.12704	A	FBgn0000606	eve	DOWNSTREAM	815					SiteClass[FBgn0000606|eve|DOWNSTREAM|815],TranscriptAnnot[DOWNSTREAM(MODIFIER||815||376|eve|protein_coding|CODING|FBtr0088390||1);INTERGENIC(MODIFIER||||||||||1)]	(regulatory_region|REDfly_CRMs|FBsf0000435454);(regulatory_region|REDfly_CRMs|FBsf0000435568);(regulatory_region|REDfly_CRMs|FBsf0000435810);(regulatory_region|REDfly_CRMs|FBsf0000435844);(regulatory_region|REDfly_CRMs|FBsf0000435942);(regulatory_region|REDfly_CRMs|FBsf0000436628);(regulatory_region|REDfly_CRMs|FBsf0000436662);(regulatory_region|REDfly_CRMs|FBsf0000436842);(TF_binding_site|BDTNP1…
2R_14086291_SNP	G	A	0.4682	81	92	0.070672	2.17139e-05	0.000539377	0.0444991	A	INTERGENIC		INTERGENIC						SiteClass[|||],TranscriptAnnot[INTERGENIC(MODIFIER||||||||||1)]	-
2L_6117975_SNP	G	C	0.2969	57	135	0.00641952	2.25359e-05	5.44042e-05	0.278584	C	FBgn0266521	stai	INTRON	0	FBgn0051642	CG31642	UPSTREAM	537	SiteClass[FBgn0266521|stai|INTRON|0;FBgn0051642|CG31642|UPSTREAM|537],TranscriptAnnot[UPSTREAM(MODIFIER||537||557|CG31642|protein_coding|CODING|FBtr0079199||1);INTRON(MODIFIER||||257|stai|protein_coding|CODING|FBtr0079196|2|1);INTRON(MODIFIER||||302|stai|protein_coding|CODING|FBtr0079197|2|1);INTRON(MODIFIER||||250|stai|protein_coding|CODING|FBtr0079198|2|1);INTRON(MODIFIER||||302|stai|protein_co…	-
3L_3315678_SNP	A	G	0.08543	17	182	0.843628	2.2647e-05	0.0145743	0.000240071	G	FBgn0052282	Drsl4	SYNONYMOUS_CODING	0	FBgn0052283	Drsl3	DOWNSTREAM	323	SiteClass[FBgn0052282|Drsl4|SYNONYMOUS_CODING|0;FBgn0052283|Drsl3|DOWNSTREAM|323;FBgn0052279|Drsl2|DOWNSTREAM|997],TranscriptAnnot[SYNONYMOUS_CODING(LOW|SILENT|gtG/gtA|V14|71|Drsl4|protein_coding|CODING|FBtr0073061|1|1);DOWNSTREAM(MODIFIER||997||70|Drsl2|protein_coding|CODING|FBtr0073059||1);DOWNSTREAM(MODIFIER||323||71|Drsl3|protein_coding|CODING|FBtr0073060||1)]	(TF_binding_site|BDTNP1_TFBS_dl|FBsf0000305367);(TF_binding_site|mE1_TFBS_HSA|FBsf0000361768);(TF_binding_site|mE1_TFBS_HSA|FBsf0000361769)
2R_17976085_SNP	A	T	0.1859	37	162	0.298809	2.31454e-05	0.00299641	0.00535786	T	FBgn0034692	CG13502	UTR_5_PRIME	0	FBgn0263250	CG43393	DOWNSTREAM	843	SiteClass[FBgn0034692|CG13502|UTR_5_PRIME|0;FBgn0263250|CG43393|DOWNSTREAM|843],TranscriptAnnot[UTR_5_PRIME(MODIFIER||1||267|CG13502|protein_coding|CODING|FBtr0308241|1|1);DOWNSTREAM(MODIFIER||843||127|CG43393|protein_coding|CODING|FBtr0308240||1)]	-
3L_10594397_DEL	A	TG	0.1624	32	165	0.0645791	2.31951e-05	0.000505233	0.0505463	TG	INTERGENIC		INTERGENIC						SiteClass[|||],TranscriptAnnot[INTERGENIC(MODIFIER||||||||||1)]	-
3L_6461181_SNP	C	A	0.1	19	171	0.18853	2.33937e-05	0.00168623	0.0125003	A	FBgn0261801	CG42747	INTRON	0					SiteClass[FBgn0261801|CG42747|INTRON|0],TranscriptAnnot[INTRON(MODIFIER||||404|CG42747|protein_coding|CODING|FBtr0303270|3|1)]	(TF_binding_site|mE1_TFBS_cad|FBsf0000244350)
2R_3810113_SNP	G	T	0.06599	13	184	0.0810649	2.37495e-05	0.000650431	0.0398071	T	FBgn0026393	Or43b	UPSTREAM	4	FBgn0033233	Kdm4A	DOWNSTREAM	167	SiteClass[FBgn0026393|Or43b|UPSTREAM|4;FBgn0033233|Kdm4A|DOWNSTREAM|167],TranscriptAnnot[UPSTREAM(MODIFIER||4||403|Or43b|protein_coding|CODING|FBtr0088887||1);DOWNSTREAM(MODIFIER||167||495|Kdm4A|protein_coding|CODING|FBtr0088886||1);DOWNSTREAM(MODIFIER||167||489|Kdm4A|protein_coding|CODING|FBtr0309844||1);INTERGENIC(MODIFIER||||||||||1)]	(TF_binding_site|BDTNP1_TFBS_twi|FBsf0000198691);(TF_binding_site|mE1_TFBS_cad|FBsf0000246031);(TF_binding_site|mE1_TFBS_HSA|FBsf0000354349)
3L_8709373_SNP	A	G	0.2041	40	156	0.0414479	2.3922e-05	0.00032475	0.0789966	G	INTERGENIC		INTERGENIC						SiteClass[|||],TranscriptAnnot[INTERGENIC(MODIFIER||||||||||1)]	-
3L_6461197_SNP	C	T	0.09948	19	172	0.185151	2.40867e-05	0.00167001	0.0130829	T	FBgn0261801	CG42747	INTRON	0					SiteClass[FBgn0261801|CG42747|INTRON|0],TranscriptAnnot[INTRON(MODIFIER||||404|CG42747|protein_coding|CODING|FBtr0303270|3|1)]	(TF_binding_site|mE1_TFBS_cad|FBsf0000244350)
3R_23467537_SNP	T	A	0.44	77	98	0.0970607	2.43257e-05	0.000799627	0.03254	A	FBgn0266579	tau	INTRON	0	FBgn0262286	mir-1001	DOWNSTREAM	651	SiteClass[FBgn0266579|tau|INTRON|0;FBgn0262286|mir-1001|DOWNSTREAM|651],TranscriptAnnot[DOWNSTREAM(MODIFIER||651|||mir-1001|pre_miRNA|NON_CODING|FBtr0304414||1);DOWNSTREAM(MODIFIER||705|||mir-1001|miRNA|NON_CODING|FBtr0304415||1);INTRON(MODIFIER||||403|tau|protein_coding|CODING|FBtr0344745|6|1);INTRON(MODIFIER||||350|tau|protein_coding|CODING|FBtr0344748|5|1);INTRON(MODIFIER||||288|tau|protein_co…	-
2L_4143178_INS	A	AAGTCCTAGTTAA	0.2917	49	119	0.00467477	2.44052e-05	4.29416e-05	0.333861	A	INTERGENIC		INTERGENIC						SiteClass[|||],TranscriptAnnot[INTERGENIC(MODIFIER||||||||||1)]	-
3L_14441439_SNP	T	A	0.08065	15	171	0.0316072	2.444e-05	0.00025049	0.100709	A	FBgn0087007	bbg	INTRON	0					SiteClass[FBgn0087007|bbg|INTRON|0],TranscriptAnnot[UTR_5_PRIME(MODIFIER||9889||1095|bbg|protein_coding|CODING|FBtr0273428|1|1);INTRON(MODIFIER||||1101|bbg|protein_coding|CODING|FBtr0273423|1|1);INTRON(MODIFIER||||2637|bbg|protein_coding|CODING|FBtr0273422|4|1);INTRON(MODIFIER||||1842|bbg|protein_coding|CODING|FBtr0273427|2|1);INTRON(MODIFIER||||2637|bbg|protein_coding|CODING|FBtr0308596|4|1)]	(TF_binding_site|BDTNP1_TFBS_gt|FBsf0000293981);(TF_binding_site|BDTNP1_TFBS_Med|FBsf0000283088);(TF_binding_site|BDTNP1_TFBS_sna|FBsf0000269427);(TF_binding_site|BDTNP1_TFBS_twi|FBsf0000203797);(TF_binding_site|mE1_TFBS_cad|FBsf0000245010);(TF_binding_site|mE1_TFBS_HSA|FBsf0000365196);(TF_binding_site|mE1_TFBS_sbb|FBsf0000250286);(TF_binding_site|mE1_TFBS_Trl|FBsf0000339969)
3L_18243628_SNP	C	T	0.25	44	132	0.485791	2.44812e-05	0.00602452	0.00174997	T	INTERGENIC		INTERGENIC						SiteClass[|||],TranscriptAnnot[INTERGENIC(MODIFIER||||||||||1)]	(TF_binding_site|BDTNP1_TFBS_da|FBsf0000327509);(TF_binding_site|BDTNP1_TFBS_twi|FBsf0000204177)
3L_14375533_SNP	A	T	0.1753	34	160	0.316924	2.48185e-05	0.00332865	0.00494843	T	FBgn0262580	CG43120	NON_SYNONYMOUS_CODING	0					SiteClass[FBgn0262580|CG43120|NON_SYNONYMOUS_CODING|0],TranscriptAnnot[NON_SYNONYMOUS_CODING(MODERATE|MISSENSE|gTg/gAg|V134E|286|CG43120|protein_coding|CODING|FBtr0304959|2|1)]	-
2L_10272090_SNP	G	A	0.4918	90	93	0.158511	2.49127e-05	0.00140863	0.0169619	G	FBgn0003751	trk	SYNONYMOUS_CODING	0	FBgn0260749	Utx	DOWNSTREAM	235	SiteClass[FBgn0003751|trk|SYNONYMOUS_CODING|0;FBgn0260749|Utx|DOWNSTREAM|235;FBgn0260750|Mulk|DOWNSTREAM|625],TranscriptAnnot[SYNONYMOUS_CODING(LOW|SILENT|tcC/tcT|S40|235|trk|protein_coding|CODING|FBtr0080078|1|1);DOWNSTREAM(MODIFIER||235||939|Utx|protein_coding|CODING|FBtr0080076||1);DOWNSTREAM(MODIFIER||625||408|Mulk|protein_coding|CODING|FBtr0079986||1);DOWNSTREAM(MODIFIER||537||1136|Utx|prote…	-
2R_6813633_SNP	T	G	0.07937	15	174	0.0304331	2.51438e-05	0.000244675	0.105073	G	INTERGENIC		INTERGENIC						SiteClass[|||],TranscriptAnnot[INTERGENIC(MODIFIER||||||||||1)]	(TF_binding_site|mE1_TFBS_HSA|FBsf0000355456);(TF_binding_site|mE1_TFBS_sbb|FBsf0000251231)
2R_15930243_SNP	A	T	0.1818	34	153	0.0220825	2.51486e-05	0.000179382	0.13466	T	INTERGENIC		INTERGENIC						SiteClass[|||],TranscriptAnnot[INTERGENIC(MODIFIER||||||||||1)]	(TF_binding_site|BDTNP1_TFBS_dl|FBsf0000303350);(TF_binding_site|BDTNP1_TFBS_Med|FBsf0000280981);(TF_binding_site|mE1_TFBS_cad|FBsf0000247054)
3L_6782215_SNP	C	T	0.06878	13	176	0.179674	2.5334e-05	0.00164523	0.014115	T	INTERGENIC		INTERGENIC						SiteClass[|||],TranscriptAnnot[INTERGENIC(MODIFIER||||||||||1)]	(TF_binding_site|BDTNP1_TFBS_dl|FBsf0000305968);(TF_binding_site|BDTNP1_TFBS_twi|FBsf0000203104)
2L_14359962_SNP	C	T	0.1799	34	155	0.0168857	2.55521e-05	0.000140231	0.163684	T	FBgn0266428	CR43463	EXON	0	FBgn0001970	Pgant35A	SYNONYMOUS_CODING	0	SiteClass[FBgn0266428|CR43463|EXON|0;FBgn0001970|Pgant35A|SYNONYMOUS_CODING|0],TranscriptAnnot[SYNONYMOUS_CODING(LOW|SILENT|Ttg/Ctg|L195|632|Pgant35A|protein_coding|CODING|FBtr0080629|1|1);EXON(MODIFIER|||||CR43463|ncRNA|NON_CODING|FBtr0309282|2|1);EXON(MODIFIER|||||CR43463|ncRNA|NON_CODING|FBtr0309283|1|1)]	(TF_binding_site|BDTNP1_TFBS_dl|FBsf0000298614);(TF_binding_site|mE1_TFBS_cad|FBsf0000242123);(TF_binding_site|mE1_TFBS_chinmo|FBsf0000207714);(TF_binding_site|mE1_TFBS_HSA|FBsf0000351075);(TF_binding_site|mE1_TFBS_sens|FBsf0000217652)
X_9195264_SNP	A	T	0.196	39	160	0.0230902	2.56182e-05	0.000188928	0.131208	T	FBgn0002576	lz	INTRON	0					SiteClass[FBgn0002576|lz|INTRON|0],TranscriptAnnot[INTRON(MODIFIER||||705|lz|protein_coding|CODING|FBtr0112814|4|1);INTRON(MODIFIER||||826|lz|protein_coding|CODING|FBtr0071320|5|1)]	-
2L_10111037_SNP	A	G	0.09626	18	169	0.309461	2.56259e-05	0.0032659	0.00530618	G	FBgn0265002	CG44153	INTRON	0	FBgn0083945	CG34109	SYNONYMOUS_CODING	0	SiteClass[FBgn0265002|CG44153|INTRON|0;FBgn0083945|CG34109|SYNONYMOUS_CODING|0],TranscriptAnnot[SYNONYMOUS_CODING(LOW|SILENT|caG/caA|Q362|800|CG34109|protein_coding|CODING|FBtr0300423|8|1);INTRON(MODIFIER||||1946|CG44153|protein_coding|CODING|FBtr0335509|6|1);INTRON(MODIFIER||||1946|CG44153|protein_coding|CODING|FBtr0335510|6|1)]	-
2R_7777942_SNP	T	C	0.1606	31	162	0.0125514	2.56569e-05	0.000106677	0.198647	C	FBgn0033663	ERp60	INTRON	0	FBgn0000556	Ef1alpha48D	UPSTREAM	698	SiteClass[FBgn0033663|ERp60|INTRON|0;FBgn0000556|Ef1alpha48D|UPSTREAM|698],TranscriptAnnot[UPSTREAM(MODIFIER||698||463|Ef1alpha48D|protein_coding|CODING|FBtr0345023||1);UPSTREAM(MODIFIER||959||463|Ef1alpha48D|protein_coding|CODING|FBtr0331927||1);INTRON(MODIFIER||||489|ERp60|protein_coding|CODING|FBtr0088058|1|1)]	(TF_binding_site|BDTNP1_TFBS_dl|FBsf0000301524);(TF_binding_site|mE1_TFBS_cad|FBsf0000246402);(TF_binding_site|mE1_TFBS_HSA|FBsf0000355804);(TF_binding_site|mE1_TFBS_sens|FBsf0000227484)
3R_11011089_SNP	A	T	0.4749	85	94	0.0626503	2.57172e-05	0.000513089	0.0546891	A	FBgn0038295	Gyc88E	INTRON	0					SiteClass[FBgn0038295|Gyc88E|INTRON|0],TranscriptAnnot[INTRON(MODIFIER||||1097|Gyc88E|protein_coding|CODING|FBtr0110961|3|1);INTRON(MODIFIER||||1097|Gyc88E|protein_coding|CODING|FBtr0306245|2|1);INTRON(MODIFIER||||1090|Gyc88E|protein_coding|CODING|FBtr0334926|2|1)]	-
3L_7824229_SNP	G	A	0.05128	10	185	0.367466	2.59069e-05	0.00413287	0.00367014	A	FBgn0016694	Pdp1	INTRON	0					SiteClass[FBgn0016694|Pdp1|INTRON|0],TranscriptAnnot[SYNONYMOUS_CODING(LOW|SILENT|caT/caC|H150|633|Pdp1|protein_coding|CODING|FBtr0300500|2|1);SYNONYMOUS_CODING(LOW|SILENT|caT/caC|H150|647|Pdp1|protein_coding|CODING|FBtr0076780|2|1);INTRON(MODIFIER||||270|Pdp1|protein_coding|CODING|FBtr0076776|1|1);INTRON(MODIFIER||||232|Pdp1|protein_coding|CODING|FBtr0300499|2|1);INTRON(MODIFIER||||270|Pdp1|prot…	(TF_binding_site|BDTNP1_TFBS_dl|FBsf0000306106);(TF_binding_site|BDTNP1_TFBS_twi|FBsf0000203168);(TF_binding_site|mE1_TFBS_chinmo|FBsf0000209940);(TF_binding_site|mE1_TFBS_HSA|FBsf0000363083)
3L_8257780_SNP	T	A	0.0567	11	183	0.024411	2.67055e-05	0.000203408	0.127873	A	FBgn0263219	Dscam4	INTRON	0					SiteClass[FBgn0263219|Dscam4|INTRON|0],TranscriptAnnot[INTRON(MODIFIER||||1918|Dscam4|protein_coding|CODING|FBtr0299839|8|1);INTRON(MODIFIER||||1918|Dscam4|protein_coding|CODING|FBtr0299840|8|1);INTRON(MODIFIER||||1874|Dscam4|protein_coding|CODING|FBtr0299841|8|1);INTRON(MODIFIER||||1935|Dscam4|protein_coding|CODING|FBtr0333589|8|1);INTRON(MODIFIER||||1935|Dscam4|protein_coding|CODING|FBtr0333590…	-
2L_14915452_SNP	G	A	0.3817	71	115	0.00594397	2.72192e-05	5.61837e-05	0.306915	A	FBgn0259213	CG42313	INTRON	0					SiteClass[FBgn0259213|CG42313|INTRON|0],TranscriptAnnot[INTRON(MODIFIER||||1064|CG42313|protein_coding|CODING|FBtr0299711|15|1);INTRON(MODIFIER||||1064|CG42313|protein_coding|CODING|FBtr0345431|15|1)]	-
2R_6814077_SNP	T	C	0.05319	10	178	0.132761	2.73885e-05	0.00119516	0.023008	C	INTERGENIC		INTERGENIC						SiteClass[|||],TranscriptAnnot[INTERGENIC(MODIFIER||||||||||1)]	-
2L_20376459_SNP	G	C	0.2011	37	147	0.0957625	2.75096e-05	0.000832004	0.0351369	C	FBgn0032856	CG16798	DOWNSTREAM	522					SiteClass[FBgn0032856|CG16798|DOWNSTREAM|522],TranscriptAnnot[DOWNSTREAM(MODIFIER||522||561|CG16798|protein_coding|CODING|FBtr0081371||1);INTERGENIC(MODIFIER||||||||||1)]	-
3L_6461185_SNP	A	T	0.1	19	171	0.196905	2.76421e-05	0.00190423	0.0127849	T	FBgn0261801	CG42747	INTRON	0					SiteClass[FBgn0261801|CG42747|INTRON|0],TranscriptAnnot[INTRON(MODIFIER||||404|CG42747|protein_coding|CODING|FBtr0303270|3|1)]	(TF_binding_site|mE1_TFBS_cad|FBsf0000244350)
2R_8217074_SNP	C	T	0.2474	48	146	0.00252495	2.767e-05	2.71288e-05	0.451078	C	FBgn0264560	garz	SYNONYMOUS_CODING	0					SiteClass[FBgn0264560|garz|SYNONYMOUS_CODING|0],TranscriptAnnot[SYNONYMOUS_CODING(LOW|SILENT|caC/caT|H861|1740|garz|protein_coding|CODING|FBtr0087898|6|1);SYNONYMOUS_CODING(LOW|SILENT|caC/caT|H861|1983|garz|protein_coding|CODING|FBtr0087897|6|1);SYNONYMOUS_CODING(LOW|SILENT|caC/caT|H861|1741|garz|protein_coding|CODING|FBtr0305075|6|1)]	(TF_binding_site|mE1_TFBS_cad|FBsf0000246442)
X_2554706_SNP	G	A	0.07071	14	184	0.384402	2.7724e-05	0.00451329	0.00345286	A	FBgn0003371	sgg	INTRON	0					SiteClass[FBgn0003371|sgg|INTRON|0],TranscriptAnnot[NON_SYNONYMOUS_CODING(MODERATE|MISSENSE|Agc/Ggc|S442G|1067|sgg|protein_coding|CODING|FBtr0070471|1|1);NON_SYNONYMOUS_CODING(MODERATE|MISSENSE|Agc/Ggc|S442G|1126|sgg|protein_coding|CODING|FBtr0331751|2|1);NON_SYNONYMOUS_CODING(MODERATE|MISSENSE|Agc/Ggc|S442G|1168|sgg|protein_coding|CODING|FBtr0331752|2|1);INTRON(MODIFIER||||514|sgg|protein_coding…	(TF_binding_site|mE1_TFBS_chinmo|FBsf0000208219)
3L_10594394_SNP	C	G	0.1633	32	164	0.0796766	2.80312e-05	0.000687873	0.0439209	G	INTERGENIC		INTERGENIC						SiteClass[|||],TranscriptAnnot[INTERGENIC(MODIFIER||||||||||1)]	-
3L_4788580_DEL	T	TCGCAAAT	0.1341	24	155	0.112553	2.80872e-05	0.00100333	0.0290335	TCGCAAAT	FBgn0035574	RhoGEF64C	INTRON	0					SiteClass[FBgn0035574|RhoGEF64C|INTRON|0],TranscriptAnnot[INTRON(MODIFIER||||1984|RhoGEF64C|protein_coding|CODING|FBtr0073345|7|1);INTRON(MODIFIER||||1984|RhoGEF64C|protein_coding|CODING|FBtr0332738|6|1)]	-
3L_14097651_SNP	G	A	0.4792	92	100	0.00956725	2.83067e-05	8.76324e-05	0.241191	G	FBgn0036411	Sox21a	SYNONYMOUS_CODING	0					SiteClass[FBgn0036411|Sox21a|SYNONYMOUS_CODING|0],TranscriptAnnot[SYNONYMOUS_CODING(LOW|SILENT|taC/taT|Y290|388|Sox21a|protein_coding|CODING|FBtr0075748|3|1);SYNONYMOUS_CODING(LOW|SILENT|taC/taT|Y290|407|Sox21a|protein_coding|CODING|FBtr0330178|3|1)]	(TF_binding_site|mE1_TFBS_cad|FBsf0000244975)
2R_13397191_SNP	A	C	0.3177	61	131	0.77901	2.83671e-05	0.0135939	0.000402831	A	FBgn0085222	CG34193	UPSTREAM	240					SiteClass[FBgn0085222|CG34193|UPSTREAM|240],TranscriptAnnot[UTR_5_PRIME(MODIFIER||297||77|CG34193|protein_coding|CODING|FBtr0345622|1|1);UPSTREAM(MODIFIER||240||77|CG34193|protein_coding|CODING|FBtr0112386||1)]	-
2R_16368516_DEL	C	CC	0.05155	10	184	0.420442	2.85155e-05	0.00517164	0.00283202	CC	INTERGENIC		INTERGENIC						SiteClass[|||],TranscriptAnnot[INTERGENIC(MODIFIER||||||||||1)]	-
3L_11896978_SNP	A	C	0.4154	81	114	0.0197578	2.90632e-05	0.000173387	0.153983	A	FBgn0266100	CG44837	INTRON	0					SiteClass[FBgn0266100|CG44837|INTRON|0],TranscriptAnnot[INTRON(MODIFIER||||964|CG44837|protein_coding|CODING|FBtr0343552|2|1)]	-
2R_15204821_SNP	A	T	0.2316	44	146	0.0456659	2.95163e-05	0.00039539	0.0790958	T	FBgn0264753	Rgk1	INTRON	0					SiteClass[FBgn0264753|Rgk1|INTRON|0],TranscriptAnnot[INTRON(MODIFIER||||498|Rgk1|protein_coding|CODING|FBtr0334282|5|1);INTRON(MODIFIER||||1379|Rgk1|protein_coding|CODING|FBtr0334283|12|1);INTRON(MODIFIER||||514|Rgk1|protein_coding|CODING|FBtr0334284|5|1)]	-
3L_6782255_SNP	C	G	0.0618	11	167	0.0570343	3.01961e-05	0.000501226	0.0646448	G	INTERGENIC		INTERGENIC						SiteClass[|||],TranscriptAnnot[INTERGENIC(MODIFIER||||||||||1)]	(TF_binding_site|BDTNP1_TFBS_dl|FBsf0000305968);(TF_binding_site|BDTNP1_TFBS_twi|FBsf0000203104)
2L_17917400_SNP	A	C	0.123	23	164	0.0766322	3.03031e-05	0.000683563	0.0475817	C	INTERGENIC		INTERGENIC						SiteClass[|||],TranscriptAnnot[INTERGENIC(MODIFIER||||||||||1)]	-
2R_14042642_SNP	C	G	0.07692	15	180	0.36351	3.07469e-05	0.00434926	0.00419797	G	FBgn0022238	lolal	UTR_3_PRIME	0					SiteClass[FBgn0022238|lolal|UTR_3_PRIME|0],TranscriptAnnot[UTR_3_PRIME(MODIFIER||11||127|lolal|protein_coding|CODING|FBtr0086777|4|1);UTR_3_PRIME(MODIFIER||11||127|lolal|protein_coding|CODING|FBtr0300484|4|1);UTR_3_PRIME(MODIFIER||11||127|lolal|protein_coding|CODING|FBtr0086778|4|1);UTR_3_PRIME(MODIFIER||11||127|lolal|protein_coding|CODING|FBtr0305270|4|1);UTR_3_PRIME(MODIFIER||11||127|lolal|prot…	(TF_binding_site|BDTNP1_TFBS_da|FBsf0000324614);(TF_binding_site|BDTNP1_TFBS_dl|FBsf0000302956);(TF_binding_site|BDTNP1_TFBS_Med|FBsf0000280776);(TF_binding_site|BDTNP1_TFBS_prd|FBsf0000274508);(TF_binding_site|BDTNP1_TFBS_twi|FBsf0000199708)
3L_6173701_SNP	A	G	0.09184	18	178	0.000709531	3.09001e-05	1.02065e-05	0.707013	G	FBgn0035690	CG10274	SYNONYMOUS_CODING	0					SiteClass[FBgn0035690|CG10274|SYNONYMOUS_CODING|0],TranscriptAnnot[SYNONYMOUS_CODING(LOW|SILENT|tgC/tgT|C371|863|CG10274|protein_coding|CODING|FBtr0113149|2|1)]	(TF_binding_site|BDTNP1_TFBS_da|FBsf0000326219);(TF_binding_site|BDTNP1_TFBS_twi|FBsf0000203057);(TF_binding_site|mE1_TFBS_chinmo|FBsf0000209848);(TF_binding_site|mE1_TFBS_HSA|FBsf0000362605);(TF_binding_site|mE1_TFBS_sens|FBsf0000223181)
2R_19298230_SNP	A	C	0.3194	61	130	0.065585	3.11561e-05	0.000587706	0.0569156	A	INTERGENIC		INTERGENIC						SiteClass[|||],TranscriptAnnot[INTERGENIC(MODIFIER||||||||||1)]	-
2R_18530727_SNP	A	G	0.09091	18	180	0.324748	3.16319e-05	0.00378008	0.00546613	G	FBgn0040091	Ugt58Fa	SYNONYMOUS_CODING	0					SiteClass[FBgn0040091|Ugt58Fa|SYNONYMOUS_CODING|0],TranscriptAnnot[SYNONYMOUS_CODING(LOW|SILENT|ctC/ctT|L106|529|Ugt58Fa|protein_coding|CODING|FBtr0345505|4|1);SYNONYMOUS_CODING(LOW|SILENT|ctC/ctT|L106|529|Ugt58Fa|protein_coding|CODING|FBtr0071934|4|1)]	(TF_binding_site|mE1_TFBS_sens|FBsf0000229450)
2L_10214068_SNP	G	A	0.07812	15	177	0.0335304	3.27786e-05	0.00030579	0.10801	A	FBgn0024320	Npc1a	INTRON	0	FBgn0032194	CG4901	DOWNSTREAM	347	SiteClass[FBgn0024320|Npc1a|INTRON|0;FBgn0032194|CG4901|DOWNSTREAM|347],TranscriptAnnot[DOWNSTREAM(MODIFIER||347||694|CG4901|protein_coding|CODING|FBtr0079947||1);INTRON(MODIFIER||||1287|Npc1a|protein_coding|CODING|FBtr0079957|11|1);INTRON(MODIFIER||||1287|Npc1a|protein_coding|CODING|FBtr0303905|11|1);INTRON(MODIFIER||||1287|Npc1a|protein_coding|CODING|FBtr0303906|11|1);INTRON(MODIFIER||||1287|Np…	(TF_binding_site|mE1_TFBS_h|FBsf0000256413);(TF_binding_site|mE1_TFBS_HSA|FBsf0000347295)
3L_7747863_SNP	T	C	0.08163	16	180	0.0280259	3.29077e-05	0.000257368	0.124791	C	FBgn0035817	CG7409	SYNONYMOUS_CODING	0	FBgn0052373	CG32373	INTRON	0	SiteClass[FBgn0035817|CG7409|SYNONYMOUS_CODING|0;FBgn0052373|CG32373|INTRON|0],TranscriptAnnot[SYNONYMOUS_CODING(LOW|SILENT|ggC/ggT|G78|154|CG7409|protein_coding|CODING|FBtr0076810|1|1);INTRON(MODIFIER||||486|CG32373|protein_coding|CODING|FBtr0076805|1|1);INTRON(MODIFIER||||486|CG32373|protein_coding|CODING|FBtr0076806|2|1)]	-
3L_6693270_INS	AATGAAATTTTCCCATATATTCACTTAAAGAAGGAGCAACTTTTTATTTAACT	A	0.1534	29	160	0.0230897	3.33288e-05	0.000215122	0.145014	A	FBgn0035710	SP1173	INTRON	0					SiteClass[FBgn0035710|SP1173|INTRON|0],TranscriptAnnot[INTRON(MODIFIER||||741|SP1173|protein_coding|CODING|FBtr0076958|2|1);INTRON(MODIFIER||||741|SP1173|protein_coding|CODING|FBtr0076959|1|1);INTRON(MODIFIER||||741|SP1173|protein_coding|CODING|FBtr0076960|1|1)]	-
3R_26824266_SNP	C	G	0.2978	53	125	0.138552	3.35508e-05	0.0013692	0.0241162	G	FBgn0004573	5-HT7	INTRON	0					SiteClass[FBgn0004573|5-HT7|INTRON|0],TranscriptAnnot[INTRON(MODIFIER||||564|5-HT7|protein_coding|CODING|FBtr0085746|1|1);INTRON(MODIFIER||||564|5-HT7|protein_coding|CODING|FBtr0334508|1|1)]	-
3L_4425216_SNP	A	G	0.1055	21	178	0.000327328	3.35859e-05	5.83703e-06	0.873173	G	FBgn0035543	CG15020	INTRON	0					SiteClass[FBgn0035543|CG15020|INTRON|0],TranscriptAnnot[INTRON(MODIFIER||||604|CG15020|protein_coding|CODING|FBtr0073298|5|1)]	-
3L_4425232_SNP	T	C	0.1055	21	178	0.000327328	3.35859e-05	5.83703e-06	0.873173	C	FBgn0035543	CG15020	INTRON	0					SiteClass[FBgn0035543|CG15020|INTRON|0],TranscriptAnnot[INTRON(MODIFIER||||604|CG15020|protein_coding|CODING|FBtr0073298|5|1)]	-
3L_19839760_SNP	T	C	0.2047	35	136	0.334703	3.43694e-05	0.0040642	0.00540003	T	FBgn0020389	Papss	INTRON	0					SiteClass[FBgn0020389|Papss|INTRON|0],TranscriptAnnot[UPSTREAM(MODIFIER||649||657|Papss|protein_coding|CODING|FBtr0074888||1);UPSTREAM(MODIFIER||649||630|Papss|protein_coding|CODING|FBtr0332147||1);INTRON(MODIFIER||||630|Papss|protein_coding|CODING|FBtr0111108|1|1);INTRON(MODIFIER||||629|Papss|protein_coding|CODING|FBtr0074885|2|1);INTRON(MODIFIER||||629|Papss|protein_coding|CODING|FBtr0074886|1|…	-
3L_6782397_SNP	A	G	0.07487	14	173	0.340774	3.45711e-05	0.00417213	0.00521485	G	FBgn0086680	vvl	UPSTREAM	861					SiteClass[FBgn0086680|vvl|UPSTREAM|861],TranscriptAnnot[UPSTREAM(MODIFIER||861||427|vvl|protein_coding|CODING|FBtr0076944||1);UPSTREAM(MODIFIER||861||713|vvl|protein_coding|CODING|FBtr0330059||1);UPSTREAM(MODIFIER||861||427|vvl|protein_coding|CODING|FBtr0345911||1);INTERGENIC(MODIFIER||||||||||1)]	(TF_binding_site|BDTNP1_TFBS_da|FBsf0000326259);(TF_binding_site|BDTNP1_TFBS_dl|FBsf0000305968);(TF_binding_site|BDTNP1_TFBS_Med|FBsf0000282351);(TF_binding_site|BDTNP1_TFBS_twi|FBsf0000203104);(TF_binding_site|mE1_TFBS_HSA|FBsf0000362773);(TF_binding_site|mE1_TFBS_Trl|FBsf0000339588)
2L_16433588_SNP	T	G	0.127	24	165	0.00344117	3.5028e-05	4.01735e-05	0.423531	G	FBgn0028523	CG5888	INTRON	0					SiteClass[FBgn0028523|CG5888|INTRON|0],TranscriptAnnot[INTRON(MODIFIER||||455|CG5888|protein_coding|CODING|FBtr0080880|1|1)]	-
3L_9198937_SNP	T	C	0.132	26	171	0.486065	3.50825e-05	0.0068853	0.00223518	T	FBgn0035968	Slc45-1	INTRON	0					SiteClass[FBgn0035968|Slc45-1|INTRON|0],TranscriptAnnot[INTRON(MODIFIER||||599|Slc45-1|protein_coding|CODING|FBtr0332126|1|1);INTRON(MODIFIER||||599|Slc45-1|protein_coding|CODING|FBtr0332124|2|1);INTRON(MODIFIER||||599|Slc45-1|protein_coding|CODING|FBtr0076503|1|1);INTRON(MODIFIER||||599|Slc45-1|protein_coding|CODING|FBtr0332125|1|1)]	(TF_binding_site|mE1_TFBS_cad|FBsf0000244576)
2R_17977274_DEL	G	GCGGATCCGGAGG	0.06044	11	171	0.239051	3.56097e-05	0.00267829	0.0106167	GCGGATCCGGAGG	FBgn0263250	CG43393	UTR_3_PRIME	0					SiteClass[FBgn0263250|CG43393|UTR_3_PRIME|0],TranscriptAnnot[UTR_3_PRIME(MODIFIER||368||127|CG43393|protein_coding|CODING|FBtr0308240|3|1)]	-
3L_6693267_SNP	C	T	0.1481	28	161	0.0512992	3.59054e-05	0.000487641	0.0772658	T	FBgn0035710	SP1173	INTRON	0					SiteClass[FBgn0035710|SP1173|INTRON|0],TranscriptAnnot[INTRON(MODIFIER||||741|SP1173|protein_coding|CODING|FBtr0076958|2|1);INTRON(MODIFIER||||741|SP1173|protein_coding|CODING|FBtr0076959|1|1);INTRON(MODIFIER||||741|SP1173|protein_coding|CODING|FBtr0076960|1|1)]	-
2R_12698756_SNP	A	G	0.4691	91	103	0.0299495	3.59544e-05	0.000286533	0.122703	A	FBgn0265658	CR44465	DOWNSTREAM	156	FBgn0265529	CR44379	UPSTREAM	994	SiteClass[FBgn0265658|CR44465|DOWNSTREAM|156;FBgn0265529|CR44379|UPSTREAM|994],TranscriptAnnot[UPSTREAM(MODIFIER||994|||CR44379|ncRNA|NON_CODING|FBtr0340078||1);UPSTREAM(MODIFIER||994|||CR44379|ncRNA|NON_CODING|FBtr0340079||1);DOWNSTREAM(MODIFIER||156|||CR44465|ncRNA|NON_CODING|FBtr0340525||1);INTERGENIC(MODIFIER||||||||||1)]	-
3L_6461161_SNP	T	A	0.1042	20	172	0.155599	3.59721e-05	0.00161114	0.0212348	A	FBgn0261801	CG42747	INTRON	0					SiteClass[FBgn0261801|CG42747|INTRON|0],TranscriptAnnot[INTRON(MODIFIER||||404|CG42747|protein_coding|CODING|FBtr0303270|3|1)]	(TF_binding_site|mE1_TFBS_cad|FBsf0000244350)
2R_8770778_SNP	A	G	0.06806	13	178	0.157534	3.60907e-05	0.00163657	0.0208944	G	FBgn0266634	CR45141	UPSTREAM	20	FBgn0002069	Aats-asp	DOWNSTREAM	105	SiteClass[FBgn0266634|CR45141|UPSTREAM|20;FBgn0002069|Aats-asp|DOWNSTREAM|105],TranscriptAnnot[UPSTREAM(MODIFIER||20|||CR45141|ncRNA|NON_CODING|FBtr0344927||1);DOWNSTREAM(MODIFIER||105||531|Aats-asp|protein_coding|CODING|FBtr0087784||1);DOWNSTREAM(MODIFIER||105||531|Aats-asp|protein_coding|CODING|FBtr0332882||1);DOWNSTREAM(MODIFIER||105||531|Aats-asp|protein_coding|CODING|FBtr0339391||1);INTERGEN…	(TF_binding_site|BDTNP1_TFBS_dl|FBsf0000301725)
3R_18711769_SNP	C	G	0.09184	18	178	0.950407	3.66105e-05	0.0214239	0.000201321	C	INTERGENIC		INTERGENIC						SiteClass[|||],TranscriptAnnot[INTERGENIC(MODIFIER||||||||||1)]	(TF_binding_site|BDTNP1_TFBS_da|FBsf0000330201);(TF_binding_site|BDTNP1_TFBS_twi|FBsf0000265819)
3L_10298041_SNP	T	G	0.4096	77	111	0.210889	3.66976e-05	0.00232604	0.0133977	T	INTERGENIC		INTERGENIC						SiteClass[|||],TranscriptAnnot[INTERGENIC(MODIFIER||||||||||1)]	-
3L_10955332_SNP	A	T	0.3723	70	118	0.314899	3.67072e-05	0.0038484	0.00639205	T	FBgn0266784	CR45249	DOWNSTREAM	91					SiteClass[FBgn0266784|CR45249|DOWNSTREAM|91],TranscriptAnnot[DOWNSTREAM(MODIFIER||91|||CR45249|ncRNA|NON_CODING|FBtr0345410||1);INTERGENIC(MODIFIER||||||||||1)]	-
3L_7871075_SNP	G	C	0.2147	41	150	0.589653	3.69404e-05	0.00939143	0.00132215	C	FBgn0052365	CG32365	INTRON	0					SiteClass[FBgn0052365|CG32365|INTRON|0],TranscriptAnnot[INTRON(MODIFIER||||628|CG32365|protein_coding|CODING|FBtr0076746|2|1);INTRON(MODIFIER||||628|CG32365|protein_coding|CODING|FBtr0339897|1|1)]	(TF_binding_site|mE1_TFBS_HSA|FBsf0000363100);(TF_binding_site|mE1_TFBS_HSA|FBsf0000363101);(TF_binding_site|mE1_TFBS_sens|FBsf0000223417)
2L_6361254_SNP	T	C	0.1011	19	169	0.158864	3.78534e-05	0.00168643	0.0211753	C	FBgn0266004	CR44778	EXON	0					SiteClass[FBgn0266004|CR44778|EXON|0],TranscriptAnnot[EXON(MODIFIER|||||CR44778|ncRNA|NON_CODING|FBtr0343150|2|1)]	-
3L_10955330_SNP	G	A	0.3723	70	118	0.215437	3.80083e-05	0.00242174	0.0131896	A	FBgn0266784	CR45249	DOWNSTREAM	89					SiteClass[FBgn0266784|CR45249|DOWNSTREAM|89],TranscriptAnnot[DOWNSTREAM(MODIFIER||89|||CR45249|ncRNA|NON_CODING|FBtr0345410||1);INTERGENIC(MODIFIER||||||||||1)]	-
X_9819355_SNP	A	C	0.06599	13	184	0.0525145	3.80355e-05	0.000513026	0.0775034	C	INTERGENIC		INTERGENIC						SiteClass[|||],TranscriptAnnot[INTERGENIC(MODIFIER||||||||||1)]	-
3L_3312239_SNP	T	C	0.05076	10	187	0.400281	3.82238e-05	0.00539549	0.00386758	C	FBgn0035432	ZnT63C	SYNONYMOUS_CODING	0					SiteClass[FBgn0035432|ZnT63C|SYNONYMOUS_CODING|0],TranscriptAnnot[SYNONYMOUS_CODING(LOW|SILENT|Ctg/Ttg|L252|545|ZnT63C|protein_coding|CODING|FBtr0330103|6|1);SYNONYMOUS_CODING(LOW|SILENT|Ctg/Ttg|L252|449|ZnT63C|protein_coding|CODING|FBtr0330104|5|1);SYNONYMOUS_CODING(LOW|SILENT|Ctg/Ttg|L252|449|ZnT63C|protein_coding|CODING|FBtr0073057|6|1);SYNONYMOUS_CODING(LOW|SILENT|Ctg/Ttg|L252|449|ZnT63C|prot…	(TF_binding_site|mE1_TFBS_cad|FBsf0000244136)
2R_14086277_SNP	G	A	0.4896	94	98	0.101523	3.90489e-05	0.00103583	0.0388961	G	INTERGENIC		INTERGENIC						SiteClass[|||],TranscriptAnnot[INTERGENIC(MODIFIER||||||||||1)]	-
2R_12383968_SNP	G	T	0.199	38	153	0.0183469	3.94126e-05	0.000188447	0.181083	T	FBgn0034133	CG7813	DOWNSTREAM	426					SiteClass[FBgn0034133|CG7813|DOWNSTREAM|426],TranscriptAnnot[DOWNSTREAM(MODIFIER||426||734|CG7813|protein_coding|CODING|FBtr0087126||1);INTERGENIC(MODIFIER||||||||||1)]	(TF_binding_site|mE1_TFBS_HSA|FBsf0000357462);(TF_binding_site|mE1_TFBS_inv|FBsf0000236655)
2R_18511403_SNP	A	T	0.3787	64	105	0.399426	3.97162e-05	0.00545882	0.0039855	T	FBgn0053143	CG33143	INTRON	0					SiteClass[FBgn0053143|CG33143|INTRON|0],TranscriptAnnot[INTRON(MODIFIER||||502|CG33143|protein_coding|CODING|FBtr0071858|3|1);INTRON(MODIFIER||||539|CG33143|protein_coding|CODING|FBtr0343008|3|1);INTRON(MODIFIER||||516|CG33143|protein_coding|CODING|FBtr0343009|3|1);INTRON(MODIFIER||||757|CG33143|protein_coding|CODING|FBtr0343010|3|1)]	-
3L_22145322_DEL	G	GGTTTTGACCTGCCGACGCTTTGCTGGGAAG	0.05851	11	177	0.0516093	3.98549e-05	0.00051526	0.0803956	GGTTTTGACCTGCCGACGCTTTGCTGGGAAG	FBgn0037153	olf413	INTRON	0					SiteClass[FBgn0037153|olf413|INTRON|0],TranscriptAnnot[INTRON(MODIFIER||||760|olf413|protein_coding|CODING|FBtr0301492|1|1);INTRON(MODIFIER||||760|olf413|protein_coding|CODING|FBtr0333219|1|1)]	-
3L_10594286_SNP	G	C	0.1392	27	167	0.0836944	4.02254e-05	0.000853224	0.0493324	C	INTERGENIC		INTERGENIC						SiteClass[|||],TranscriptAnnot[INTERGENIC(MODIFIER||||||||||1)]	-
3L_3524079_SNP	T	C	0.3627	70	123	0.579446	4.02324e-05	0.00942524	0.00148351	T	FBgn0005640	Eip63E	INTRON	0	FBgn0266403	CR45043	UPSTREAM	459	SiteClass[FBgn0005640|Eip63E|INTRON|0;FBgn0266403|CR45043|UPSTREAM|459],TranscriptAnnot[UPSTREAM(MODIFIER||459|||CR45043|ncRNA|NON_CODING|FBtr0344345||1);INTRON(MODIFIER||||522|Eip63E|protein_coding|CODING|FBtr0073131|1|1);INTRON(MODIFIER||||522|Eip63E|protein_coding|CODING|FBtr0073132|2|1);INTRON(MODIFIER||||509|Eip63E|protein_coding|CODING|FBtr0110920|1|1);INTRON(MODIFIER||||509|Eip63E|protein_…	-
3L_13834398_SNP	A	G	0.08763	17	177	0.0795135	4.02427e-05	0.000808365	0.0522083	G	FBgn0036380	CG8757	SYNONYMOUS_CODING	0					SiteClass[FBgn0036380|CG8757|SYNONYMOUS_CODING|0],TranscriptAnnot[SYNONYMOUS_CODING(LOW|SILENT|atC/atT|I245|252|CG8757|protein_coding|CODING|FBtr0306683|3|1)]	(TF_binding_site|BDTNP1_TFBS_twi|FBsf0000203734);(TF_binding_site|mE1_TFBS_HSA|FBsf0000364975);(TF_binding_site|mE1_TFBS_HSA|FBsf0000364976)
2L_14359974_SNP	C	T	0.2151	40	146	0.0344336	4.09931e-05	0.000349662	0.115685	T	FBgn0266428	CR43463	EXON	0	FBgn0001970	Pgant35A	SYNONYMOUS_CODING	0	SiteClass[FBgn0266428|CR43463|EXON|0;FBgn0001970|Pgant35A|SYNONYMOUS_CODING|0],TranscriptAnnot[SYNONYMOUS_CODING(LOW|SILENT|Ttg/Ctg|L199|632|Pgant35A|protein_coding|CODING|FBtr0080629|1|1);EXON(MODIFIER|||||CR43463|ncRNA|NON_CODING|FBtr0309282|2|1);EXON(MODIFIER|||||CR43463|ncRNA|NON_CODING|FBtr0309283|1|1)]	(TF_binding_site|BDTNP1_TFBS_dl|FBsf0000298614);(TF_binding_site|mE1_TFBS_cad|FBsf0000242123);(TF_binding_site|mE1_TFBS_chinmo|FBsf0000207714);(TF_binding_site|mE1_TFBS_HSA|FBsf0000351075);(TF_binding_site|mE1_TFBS_sens|FBsf0000217652)
2L_15733127_SNP	A	G	0.1968	37	151	0.145651	4.12406e-05	0.00158384	0.0250772	G	FBgn0010382	CycE	INTRON	0					SiteClass[FBgn0010382|CycE|INTRON|0],TranscriptAnnot[INTRON(MODIFIER||||709|CycE|protein_coding|CODING|FBtr0080773|3|1);INTRON(MODIFIER||||709|CycE|protein_coding|CODING|FBtr0080774|3|1);INTRON(MODIFIER||||709|CycE|protein_coding|CODING|FBtr0080775|3|1);INTRON(MODIFIER||||709|CycE|protein_coding|CODING|FBtr0080776|4|1);INTRON(MODIFIER||||712|CycE|protein_coding|CODING|FBtr0305561|2|1)]	(regulatory_region|REDfly_CRMs|FBsf0000435688);(regulatory_region|REDfly_CRMs|FBsf0000435846);(regulatory_region|REDfly_CRMs|FBsf0000435924);(regulatory_region|REDfly_CRMs|FBsf0000436674);(TF_binding_site|BDTNP1_TFBS_da|FBsf0000322581);(TF_binding_site|BDTNP1_TFBS_dl|FBsf0000298830);(TF_binding_site|BDTNP1_TFBS_gt|FBsf0000293252);(TF_binding_site|BDTNP1_TFBS_Med|FBsf0000278685);(TF_binding_site|B…
3L_7191214_SNP	A	G	0.2161	43	156	0.145165	4.13023e-05	0.00157884	0.025214	G	INTERGENIC		INTERGENIC						SiteClass[|||],TranscriptAnnot[INTERGENIC(MODIFIER||||||||||1)]	-
3L_18238335_SNP	T	C	0.4919	91	94	0.323037	4.14762e-05	0.00417497	0.00654203	C	INTERGENIC		INTERGENIC						SiteClass[|||],TranscriptAnnot[INTERGENIC(MODIFIER||||||||||1)]	(TF_binding_site|mE1_TFBS_HSA|FBsf0000366485);(TF_binding_site|mE1_TFBS_HSA|FBsf0000366486)
3L_10955333_SNP	G	C	0.367	69	119	0.354261	4.24537e-05	0.00475951	0.0054587	C	FBgn0266784	CR45249	DOWNSTREAM	92					SiteClass[FBgn0266784|CR45249|DOWNSTREAM|92],TranscriptAnnot[DOWNSTREAM(MODIFIER||92|||CR45249|ncRNA|NON_CODING|FBtr0345410||1);INTERGENIC(MODIFIER||||||||||1)]	-
3R_18723113_SNP	A	T	0.05528	11	188	0.00971236	4.28019e-05	0.000110239	0.273549	A	INTERGENIC		INTERGENIC						SiteClass[|||],TranscriptAnnot[INTERGENIC(MODIFIER||||||||||1)]	(TF_binding_site|BDTNP1_TFBS_twi|FBsf0000265821)
2L_8390625_SNP	C	T	0.3936	74	114	0.521923	4.2838e-05	0.0650409	9.00895e-06	T	FBgn0262002	CG42820	SYNONYMOUS_CODING	0	FBgn0041717	snRNA:U6atac:29B	DOWNSTREAM	805	SiteClass[FBgn0262002|CG42820|SYNONYMOUS_CODING|0;FBgn0041717|snRNA:U6atac:29B|DOWNSTREAM|805],TranscriptAnnot[SYNONYMOUS_CODING(LOW|SILENT|gaA/gaG|E510|689|CG42820|protein_coding|CODING|FBtr0303799|3|1);DOWNSTREAM(MODIFIER||805|||snRNA:U6atac:29B|snRNA|NON_CODING|FBtr0079659||1)]	(TF_binding_site|BDTNP1_TFBS_twi|FBsf0000201222);(TF_binding_site|mE1_TFBS_HSA|FBsf0000346766);(TF_binding_site|mE1_TFBS_sens|FBsf0000216804)
3R_13319274_SNP	C	A	0.07216	14	180	0.394181	4.28713e-05	0.00551962	0.00432043	A	FBgn0261046	Dscam3	INTRON	0					SiteClass[FBgn0261046|Dscam3|INTRON|0],TranscriptAnnot[INTRON(MODIFIER||||2007|Dscam3|protein_coding|CODING|FBtr0113397|6|1);INTRON(MODIFIER||||1006|Dscam3|protein_coding|CODING|FBtr0113398|5|1);INTRON(MODIFIER||||2087|Dscam3|protein_coding|CODING|FBtr0330211|5|1);INTRON(MODIFIER||||2077|Dscam3|protein_coding|CODING|FBtr0330212|5|1)]	-
3L_22232878_SNP	T	C	0.07487	14	173	0.0315159	4.29874e-05	0.000328398	0.126534	C	FBgn0037153	olf413	INTRON	0					SiteClass[FBgn0037153|olf413|INTRON|0],TranscriptAnnot[INTRON(MODIFIER||||760|olf413|protein_coding|CODING|FBtr0301492|10|1);INTRON(MODIFIER||||760|olf413|protein_coding|CODING|FBtr0333219|10|1)]	(TF_binding_site|mE1_TFBS_cad|FBsf0000245631);(TF_binding_site|mE1_TFBS_chinmo|FBsf0000210566);(TF_binding_site|mE1_TFBS_HSA|FBsf0000367799)
3R_23382290_SNP	T	C	0.1436	28	167	0.65585	4.30652e-05	0.0117395	0.00104644	C	FBgn0004387	Klp98A	INTRON	0					SiteClass[FBgn0004387|Klp98A|INTRON|0],TranscriptAnnot[INTRON(MODIFIER||||1265|Klp98A|protein_coding|CODING|FBtr0085211|1|1);INTRON(MODIFIER||||1224|Klp98A|protein_coding|CODING|FBtr0304671|1|1)]	(TF_binding_site|BDTNP1_TFBS_z|FBsf0000197895)
2R_19013009_SNP	T	A	0.328	61	125	0.325022	4.32189e-05	0.00427728	0.00662714	A	FBgn0034824	Klp59C	NON_SYNONYMOUS_CODING	0					SiteClass[FBgn0034824|Klp59C|NON_SYNONYMOUS_CODING|0],TranscriptAnnot[NON_SYNONYMOUS_CODING(MODERATE|MISSENSE|cTa/cAa|L141Q|626|Klp59C|protein_coding|CODING|FBtr0071975|1|1)]	(TF_binding_site|BDTNP1_TFBS_twi|FBsf0000200218);(TF_binding_site|mE1_TFBS_chinmo|FBsf0000211857)
2R_16353352_SNP	T	G	0.055	11	189	0.0117746	4.34978e-05	0.000132093	0.246791	T	FBgn0086604	CG12484	INTRON	0					SiteClass[FBgn0086604|CG12484|INTRON|0],TranscriptAnnot[INTRON(MODIFIER||||736|CG12484|protein_coding|CODING|FBtr0112774|9|1);INTRON(MODIFIER||||1201|CG12484|protein_coding|CODING|FBtr0112775|9|1);INTRON(MODIFIER||||1194|CG12484|protein_coding|CODING|FBtr0273284|8|1);INTRON(MODIFIER||||1142|CG12484|protein_coding|CODING|FBtr0342690|8|1)]	-
2L_18933429_SNP	A	G	0.1895	36	154	0.702679	4.36333e-05	0.013202	0.000830858	A	FBgn0032723	ssp3	INTRON	0					SiteClass[FBgn0032723|ssp3|INTRON|0],TranscriptAnnot[INTRON(MODIFIER||||1732|ssp3|protein_coding|CODING|FBtr0081193|6|1);INTRON(MODIFIER||||1730|ssp3|protein_coding|CODING|FBtr0342929|6|1)]	(TF_binding_site|mE1_TFBS_HSA|FBsf0000352306);(TF_binding_site|mE1_TFBS_sens|FBsf0000218193)
3L_9198946_SNP	C	G	0.1421	27	163	0.435691	4.4011e-05	0.00640593	0.00345736	C	FBgn0035968	Slc45-1	INTRON	0					SiteClass[FBgn0035968|Slc45-1|INTRON|0],TranscriptAnnot[INTRON(MODIFIER||||599|Slc45-1|protein_coding|CODING|FBtr0332126|1|1);INTRON(MODIFIER||||599|Slc45-1|protein_coding|CODING|FBtr0332124|2|1);INTRON(MODIFIER||||599|Slc45-1|protein_coding|CODING|FBtr0076503|1|1);INTRON(MODIFIER||||599|Slc45-1|protein_coding|CODING|FBtr0332125|1|1)]	(TF_binding_site|mE1_TFBS_cad|FBsf0000244576)
2L_14127387_SNP	A	G	0.4811	89	96	0.0676054	4.40151e-05	0.000710992	0.0645725	G	INTERGENIC		INTERGENIC						SiteClass[|||],TranscriptAnnot[INTERGENIC(MODIFIER||||||||||1)]	-
3R_15311056_SNP	G	C	0.07254	14	179	0.0581907	4.41113e-05	0.000610257	0.0750038	G	FBgn0260003	Dys	INTRON	0					SiteClass[FBgn0260003|Dys|INTRON|0],TranscriptAnnot[INTRON(MODIFIER||||3497|Dys|protein_coding|CODING|FBtr0083764|10|1);INTRON(MODIFIER||||3127|Dys|protein_coding|CODING|FBtr0083765|9|1);INTRON(MODIFIER||||3529|Dys|protein_coding|CODING|FBtr0110917|9|1);INTRON(MODIFIER||||3504|Dys|protein_coding|CODING|FBtr0110918|9|1);INTRON(MODIFIER||||3598|Dys|protein_coding|CODING|FBtr0110919|10|1);INTRON(MOD…	-
2L_4957717_SNP	A	G	0.2	39	156	0.143732	4.43492e-05	0.00160982	0.0265368	G	FBgn0031655	Marcal1	INTRON	0	FBgn0083960	CG34124	UPSTREAM	694	SiteClass[FBgn0031655|Marcal1|INTRON|0;FBgn0083960|CG34124|UPSTREAM|694],TranscriptAnnot[UPSTREAM(MODIFIER||694||2003|CG34124|protein_coding|CODING|FBtr0110838||1);INTRON(MODIFIER||||755|Marcal1|protein_coding|CODING|FBtr0078992|5|1)]	-
3L_11341839_SNP	T	C	0.06	12	188	0.0813937	4.4801e-05	0.000869916	0.053528	C	FBgn0266786	CR45251	DOWNSTREAM	656					SiteClass[FBgn0266786|CR45251|DOWNSTREAM|656],TranscriptAnnot[DOWNSTREAM(MODIFIER||656|||CR45251|ncRNA|NON_CODING|FBtr0345412||1);INTERGENIC(MODIFIER||||||||||1)]	-
3R_14113286_SNP	G	A	0.1451	28	165	0.000509375	4.4978e-05	9.83302e-06	0.830359	G	FBgn0038598	CG7131	INTRON	0	FBgn0038597	CG8064	DOWNSTREAM	940	SiteClass[FBgn0038598|CG7131|INTRON|0;FBgn0038597|CG8064|DOWNSTREAM|940],TranscriptAnnot[DOWNSTREAM(MODIFIER||940||922|CG8064|protein_coding|CODING|FBtr0083574||1);INTRON(MODIFIER||||494|CG7131|protein_coding|CODING|FBtr0083597|1|1)]	(TF_binding_site|mE1_TFBS_cad|FBsf0000248679);(TF_binding_site|mE1_TFBS_chinmo|FBsf0000212886);(TF_binding_site|mE1_TFBS_HSA|FBsf0000372850)
X_7681175_SNP	T	C	0.4845	94	100	0.041259	4.50544e-05	0.000436854	0.103439	C	INTERGENIC		INTERGENIC						SiteClass[|||],TranscriptAnnot[INTERGENIC(MODIFIER||||||||||1)]	-
3L_11341840_SNP	T	A	0.0597	12	189	0.0795263	4.52225e-05	0.000852559	0.0551364	A	FBgn0266786	CR45251	DOWNSTREAM	655					SiteClass[FBgn0266786|CR45251|DOWNSTREAM|655],TranscriptAnnot[DOWNSTREAM(MODIFIER||655|||CR45251|ncRNA|NON_CODING|FBtr0345412||1);INTERGENIC(MODIFIER||||||||||1)]	-
2R_19105346_SNP	A	G	0.06533	13	186	0.020184	4.55524e-05	0.000221531	0.179018	G	INTERGENIC		INTERGENIC						SiteClass[|||],TranscriptAnnot[INTERGENIC(MODIFIER||||||||||1)]	(TF_binding_site|BDTNP1_TFBS_da|FBsf0000325237);(TF_binding_site|BDTNP1_TFBS_dl|FBsf0000304070);(TF_binding_site|BDTNP1_TFBS_Med|FBsf0000281356);(TF_binding_site|BDTNP1_TFBS_prd|FBsf0000274641);(TF_binding_site|BDTNP1_TFBS_twi|FBsf0000200232);(TF_binding_site|mE1_TFBS_HSA|FBsf0000359711);(TF_binding_site|mE1_TFBS_HSA|FBsf0000359712)
2R_3808533_SNP	C	G	0.1406	27	165	0.00410482	4.56722e-05	5.40085e-05	0.422798	C	FBgn0026393	Or43b	SYNONYMOUS_CODING	0	FBgn0015509	Cul1	DOWNSTREAM	130	SiteClass[FBgn0026393|Or43b|SYNONYMOUS_CODING|0;FBgn0015509|Cul1|DOWNSTREAM|130],TranscriptAnnot[SYNONYMOUS_CODING(LOW|SILENT|gtG/gtC|V386|403|Or43b|protein_coding|CODING|FBtr0088887|3|1);UTR_3_PRIME(MODIFIER||623||774|Cul1|protein_coding|CODING|FBtr0088846|4|1);DOWNSTREAM(MODIFIER||130||774|Cul1|protein_coding|CODING|FBtr0088845||1);DOWNSTREAM(MODIFIER||130||774|Cul1|protein_coding|CODING|FBtr00…	-
3R_24555709_SNP	T	C	0.1582	31	165	0.00374168	4.59881e-05	5.01241e-05	0.440389	T	FBgn0027655	htt	INTRON	0					SiteClass[FBgn0027655|htt|INTRON|0],TranscriptAnnot[INTRON(MODIFIER||||3583|htt|protein_coding|CODING|FBtr0085310|27|1);INTRON(MODIFIER||||3583|htt|protein_coding|CODING|FBtr0336788|27|1)]	-
2R_18762182_SNP	G	A	0.2256	44	151	0.00225846	4.64612e-05	3.30725e-05	0.536711	A	FBgn0267025	CR45469	EXON	0	FBgn0034789	PIP5K59B	UPSTREAM	110	SiteClass[FBgn0267025|CR45469|EXON|0;FBgn0034789|PIP5K59B|UPSTREAM|110;FBgn0034788|CG13532|DOWNSTREAM|232],TranscriptAnnot[UPSTREAM(MODIFIER||110||729|PIP5K59B|protein_coding|CODING|FBtr0071900||1);UPSTREAM(MODIFIER||110||750|PIP5K59B|protein_coding|CODING|FBtr0290095||1);UPSTREAM(MODIFIER||110||777|PIP5K59B|protein_coding|CODING|FBtr0304921||1);UPSTREAM(MODIFIER||110||756|PIP5K59B|protein_coding…	(TF_binding_site|BDTNP1_TFBS_dl|FBsf0000304005);(TF_binding_site|mE1_TFBS_HSA|FBsf0000359581)
2R_19410053_DEL	T	TGT	0.07	14	186	0.193713	4.64931e-05	0.0023188	0.0175577	TGT	FBgn0015372	RabX1	INTRON	0					SiteClass[FBgn0015372|RabX1|INTRON|0],TranscriptAnnot[INTRON(MODIFIER||||261|RabX1|protein_coding|CODING|FBtr0072120|1|1)]	(TF_binding_site|BDTNP1_TFBS_dl|FBsf0000304103);(TF_binding_site|mE1_TFBS_sens|FBsf0000229593)
2R_19410058_DEL	A	AT	0.07	14	186	0.193713	4.64931e-05	0.0023188	0.0175577	AT	FBgn0015372	RabX1	INTRON	0					SiteClass[FBgn0015372|RabX1|INTRON|0],TranscriptAnnot[INTRON(MODIFIER||||261|RabX1|protein_coding|CODING|FBtr0072120|1|1)]	(TF_binding_site|BDTNP1_TFBS_dl|FBsf0000304103);(TF_binding_site|mE1_TFBS_sens|FBsf0000229593)
3L_6693265_SNP	A	T	0.1518	29	162	0.0337744	4.65278e-05	0.000364917	0.123634	T	FBgn0035710	SP1173	INTRON	0					SiteClass[FBgn0035710|SP1173|INTRON|0],TranscriptAnnot[INTRON(MODIFIER||||741|SP1173|protein_coding|CODING|FBtr0076958|2|1);INTRON(MODIFIER||||741|SP1173|protein_coding|CODING|FBtr0076959|1|1);INTRON(MODIFIER||||741|SP1173|protein_coding|CODING|FBtr0076960|1|1)]	-
2R_16366463_SNP	T	C	0.2105	40	150	0.186297	4.68421e-05	0.00222158	0.0187345	C	FBgn0086604	CG12484	DOWNSTREAM	7					SiteClass[FBgn0086604|CG12484|DOWNSTREAM|7],TranscriptAnnot[DOWNSTREAM(MODIFIER||7||1201|CG12484|protein_coding|CODING|FBtr0112775||1);DOWNSTREAM(MODIFIER||7||1194|CG12484|protein_coding|CODING|FBtr0273284||1);DOWNSTREAM(MODIFIER||7||1142|CG12484|protein_coding|CODING|FBtr0342690||1);INTERGENIC(MODIFIER||||||||||1)]	-
2L_20393090_SNP	T	C	0.1421	27	163	0.060126	4.6876e-05	0.00064908	0.0746507	C	FBgn0032857	CG10947	INTRON	0					SiteClass[FBgn0032857|CG10947|INTRON|0],TranscriptAnnot[INTRON(MODIFIER||||404|CG10947|protein_coding|CODING|FBtr0081369|1|1);INTRON(MODIFIER||||404|CG10947|protein_coding|CODING|FBtr0081370|1|1);INTRON(MODIFIER||||404|CG10947|protein_coding|CODING|FBtr0336750|1|1)]	-
3R_26544303_SNP	T	C	0.1088	21	172	0.0960286	4.71227e-05	0.00106088	0.0455315	C	INTERGENIC		INTERGENIC						SiteClass[|||],TranscriptAnnot[INTERGENIC(MODIFIER||||||||||1)]	-
3L_17176737_SNP	T	C	0.07065	13	171	0.156909	4.79093e-05	0.00183865	0.0244517	C	FBgn0260943	Rbp6	INTRON	0					SiteClass[FBgn0260943|Rbp6|INTRON|0],TranscriptAnnot[INTRON(MODIFIER||||369|Rbp6|protein_coding|CODING|FBtr0075285|3|1);INTRON(MODIFIER||||499|Rbp6|protein_coding|CODING|FBtr0113427|3|1);INTRON(MODIFIER||||371|Rbp6|protein_coding|CODING|FBtr0333861|3|1)]	-
2L_13309648_SNP	G	A	0.1692	33	162	0.114931	4.80058e-05	0.00129944	0.0370327	A	FBgn0264308	CG43778	SYNONYMOUS_CODING	0					SiteClass[FBgn0264308|CG43778|SYNONYMOUS_CODING|0],TranscriptAnnot[SYNONYMOUS_CODING(LOW|SILENT|aaT/aaC|N150|663|CG43778|protein_coding|CODING|FBtr0331504|2|1);SYNONYMOUS_CODING(LOW|SILENT|aaT/aaC|N150|963|CG43778|protein_coding|CODING|FBtr0331503|2|1);UTR_5_PRIME(MODIFIER||1155||451|CG43778|protein_coding|CODING|FBtr0331505|2|1)]	(TF_binding_site|mE1_TFBS_chinmo|FBsf0000207661)
2R_14512955_SNP	T	C	0.09137	18	179	0.0430445	4.89203e-05	0.000473801	0.103228	C	FBgn0266671	Sec6	SYNONYMOUS_CODING	0	FBgn0034366	Atg7	UPSTREAM	406	SiteClass[FBgn0266671|Sec6|SYNONYMOUS_CODING|0;FBgn0034366|Atg7|UPSTREAM|406],TranscriptAnnot[SYNONYMOUS_CODING(LOW|SILENT|caC/caT|H36|738|Sec6|protein_coding|CODING|FBtr0086709|1|1);UPSTREAM(MODIFIER||406||510|Atg7|protein_coding|CODING|FBtr0086711||1);UPSTREAM(MODIFIER||406||684|Atg7|protein_coding|CODING|FBtr0086712||1)]	(TF_binding_site|BDTNP1_TFBS_dl|FBsf0000303092);(TF_binding_site|mE1_TFBS_HSA|FBsf0000358168)
2R_8187234_SNP	A	G	0.2513	49	146	0.40848	4.92069e-05	0.00611027	0.00434881	A	FBgn0033708	CG8850	SYNONYMOUS_CODING	0	FBgn0261611	CG42700	DOWNSTREAM	835	SiteClass[FBgn0033708|CG8850|SYNONYMOUS_CODING|0;FBgn0261611|CG42700|DOWNSTREAM|835],TranscriptAnnot[SYNONYMOUS_CODING(LOW|SILENT|atT/atC|I385|629|CG8850|protein_coding|CODING|FBtr0087972|6|1);SYNONYMOUS_CODING(LOW|SILENT|atT/atC|I372|616|CG8850|protein_coding|CODING|FBtr0087973|6|1);UTR_3_PRIME(MODIFIER||2016||370|CG42700|protein_coding|CODING|FBtr0345483|7|1);DOWNSTREAM(MODIFIER||835||370|CG427…	-
X_13865222_SNP	T	C	0.2251	43	148	0.0409577	4.93155e-05	0.000452936	0.108061	T	FBgn0267033	mamo	INTRON	0					SiteClass[FBgn0267033|mamo|INTRON|0],TranscriptAnnot[INTRON(MODIFIER||||1553|mamo|protein_coding|CODING|FBtr0346001|2|1);INTRON(MODIFIER||||1553|mamo|protein_coding|CODING|FBtr0346002|2|1);INTRON(MODIFIER||||1087|mamo|protein_coding|CODING|FBtr0346004|2|1);INTRON(MODIFIER||||1109|mamo|protein_coding|CODING|FBtr0346006|2|1);INTRON(MODIFIER||||799|mamo|protein_coding|CODING|FBtr0346007|2|1)]	-
2R_12384063_INS	TT	T	0.09375	18	174	0.00315149	4.93227e-05	4.51118e-05	0.48081	T	FBgn0034133	CG7813	DOWNSTREAM	330					SiteClass[FBgn0034133|CG7813|DOWNSTREAM|330],TranscriptAnnot[DOWNSTREAM(MODIFIER||330||734|CG7813|protein_coding|CODING|FBtr0087126||1);INTERGENIC(MODIFIER||||||||||1)]	(TF_binding_site|mE1_TFBS_inv|FBsf0000236655)
3L_14430742_SNP	T	C	0.1649	32	162	0.00152235	5.67779e-05	2.68958e-05	0.643009	C	FBgn0087007	bbg	INTRON	0					SiteClass[FBgn0087007|bbg|INTRON|0],TranscriptAnnot[INTRON(MODIFIER||||1095|bbg|protein_coding|CODING|FBtr0273428|2|1);INTRON(MODIFIER||||1101|bbg|protein_coding|CODING|FBtr0273423|1|1);INTRON(MODIFIER||||2637|bbg|protein_coding|CODING|FBtr0273422|4|1);INTRON(MODIFIER||||1842|bbg|protein_coding|CODING|FBtr0273427|2|1);INTRON(MODIFIER||||2637|bbg|protein_coding|CODING|FBtr0308596|4|1)]	-
2L_11916155_DEL	C	TA	0.3901	71	111	0.00125442	6.90366e-05	2.58222e-05	0.712077	TA	FBgn0264815	Pde1c	INTRON	0					SiteClass[FBgn0264815|Pde1c|INTRON|0],TranscriptAnnot[INTRON(MODIFIER||||834|Pde1c|protein_coding|CODING|FBtr0334136|2|1);INTRON(MODIFIER||||834|Pde1c|protein_coding|CODING|FBtr0334140|2|1)]	-
2R_15394884_SNP	G	A	0.3947	75	115	0.000788587	7.31345e-05	1.85411e-05	0.817816	G	FBgn0034456	Ir56b	UPSTREAM	788	FBgn0050223	tRNA:H:56E	UPSTREAM	969	SiteClass[FBgn0034456|Ir56b|UPSTREAM|788;FBgn0050223|tRNA:H:56E|UPSTREAM|969],TranscriptAnnot[UPSTREAM(MODIFIER||969|||tRNA:H:56E|tRNA|NON_CODING|FBtr0086498||1);UPSTREAM(MODIFIER||788||408|Ir56b|protein_coding|CODING|FBtr0086465||1);INTERGENIC(MODIFIER||||||||||1)]	-
3L_14376123_SNP	G	T	0.1782	31	143	0.00162962	8.97496e-05	3.71028e-05	0.697863	T	FBgn0262580	CG43120	UTR_3_PRIME	0					SiteClass[FBgn0262580|CG43120|UTR_3_PRIME|0],TranscriptAnnot[UTR_3_PRIME(MODIFIER||81||286|CG43120|protein_coding|CODING|FBtr0304959|3|1)]	-
2R_19144698_SNP	C	T	0.5	96	96	0.00174192	9.11503e-05	3.94844e-05	0.686219	T	INTERGENIC		INTERGENIC						SiteClass[|||],TranscriptAnnot[INTERGENIC(MODIFIER||||||||||1)]	(TF_binding_site|mE1_TFBS_chinmo|FBsf0000211867)
2L_6726571_SNP	G	A	0.2116	40	149	0.000210126	9.42831e-05	7.94851e-06	0.872807	A	FBgn0046704	Liprin-alpha	INTRON	0					SiteClass[FBgn0046704|Liprin-alpha|INTRON|0],TranscriptAnnot[INTRON(MODIFIER||||1201|Liprin-alpha|protein_coding|CODING|FBtr0079300|6|1);INTRON(MODIFIER||||1201|Liprin-alpha|protein_coding|CODING|FBtr0079301|6|1);INTRON(MODIFIER||||1158|Liprin-alpha|protein_coding|CODING|FBtr0329941|7|1);INTRON(MODIFIER||||1205|Liprin-alpha|protein_coding|CODING|FBtr0329942|7|1);INTRON(MODIFIER||||1214|Liprin-alp…	-
2R_11164312_INS	GGCCCAAACGG	G	0.2363	43	139	0.000247231	9.84399e-05	9.21797e-06	0.89706	G	FBgn0265194	Trpm	INTRON	0					SiteClass[FBgn0265194|Trpm|INTRON|0],TranscriptAnnot[INTRON(MODIFIER||||1939|Trpm|protein_coding|CODING|FBtr0339074|14|1);INTRON(MODIFIER||||1131|Trpm|protein_coding|CODING|FBtr0339075|12|1);INTRON(MODIFIER||||1921|Trpm|protein_coding|CODING|FBtr0339076|12|1);INTRON(MODIFIER||||2023|Trpm|protein_coding|CODING|FBtr0339077|12|1);INTRON(MODIFIER||||1996|Trpm|protein_coding|CODING|FBtr0339078|12|1);I…	-
3L_12482447_SNP	C	T	0.0765	14	169	0.000928554	0.000101015	2.55785e-05	0.836038	T	FBgn0036288	CG10660	INTRON	0	FBgn0267241	CR45681	UPSTREAM	947	SiteClass[FBgn0036288|CG10660|INTRON|0;FBgn0267241|CR45681|UPSTREAM|947],TranscriptAnnot[UPSTREAM(MODIFIER||947|||CR45681|ncRNA|NON_CODING|FBtr0346431||1);INTRON(MODIFIER||||487|CG10660|protein_coding|CODING|FBtr0075976|1|1);INTRON(MODIFIER||||480|CG10660|protein_coding|CODING|FBtr0332645|1|1);INTRON(MODIFIER||||487|CG10660|protein_coding|CODING|FBtr0332646|1|1);INTRON(MODIFIER||||480|CG10660|pro…	-
2R_19144678_SNP	C	T	0.4948	95	97	0.0012239	0.000102737	3.20515e-05	0.780055	C	INTERGENIC		INTERGENIC						SiteClass[|||],TranscriptAnnot[INTERGENIC(MODIFIER||||||||||1)]	(TF_binding_site|mE1_TFBS_chinmo|FBsf0000211867)
2L_16618457_SNP	C	A	0.07143	13	169	0.00196093	0.000109266	4.82489e-05	0.689273	A	FBgn0259735	CG42389	INTRON	0					SiteClass[FBgn0259735|CG42389|INTRON|0],TranscriptAnnot[INTRON(MODIFIER||||2064|CG42389|protein_coding|CODING|FBtr0300003|2|1);INTRON(MODIFIER||||1762|CG42389|protein_coding|CODING|FBtr0300004|2|1);INTRON(MODIFIER||||1779|CG42389|protein_coding|CODING|FBtr0335497|2|1)]	-
2R_19144687_SNP	G	T	0.5	95	95	0.00144506	0.000117152	3.94824e-05	0.765809	T	INTERGENIC		INTERGENIC						SiteClass[|||],TranscriptAnnot[INTERGENIC(MODIFIER||||||||||1)]	(TF_binding_site|mE1_TFBS_chinmo|FBsf0000211867)
3L_12884397_SNP	T	C	0.2539	49	144	0.170741	0.000129255	0.208659	6.05486e-07	C	FBgn0264486	CG43894	DOWNSTREAM	192					SiteClass[FBgn0264486|CG43894|DOWNSTREAM|192],TranscriptAnnot[NON_SYNONYMOUS_CODING(MODERATE|MISSENSE|Cca/Tca|P116S|191|CG43894|protein_coding|CODING|FBtr0332804|3|1);DOWNSTREAM(MODIFIER||192||235|CG43894|protein_coding|CODING|FBtr0332802||1);DOWNSTREAM(MODIFIER||192||235|CG43894|protein_coding|CODING|FBtr0332803||1);INTRON(MODIFIER||||232|CG43894|protein_coding|CODING|FBtr0332805|2|1)]	-
2R_19144693_SNP	T	C	0.4974	95	96	0.00161093	0.000133315	4.64302e-05	0.763439	C	INTERGENIC		INTERGENIC						SiteClass[|||],TranscriptAnnot[INTERGENIC(MODIFIER||||||||||1)]	(TF_binding_site|mE1_TFBS_chinmo|FBsf0000211867)
2R_15929637_SNP	C	G	0.25	47	141	0.00012815	0.000133873	6.9513e-06	0.724092	G	INTERGENIC		INTERGENIC						SiteClass[|||],TranscriptAnnot[INTERGENIC(MODIFIER||||||||||1)]	(TF_binding_site|BDTNP1_TFBS_da|FBsf0000324836);(TF_binding_site|BDTNP1_TFBS_dl|FBsf0000303349);(TF_binding_site|BDTNP1_TFBS_gt|FBsf0000293607);(TF_binding_site|BDTNP1_TFBS_Med|FBsf0000280980);(TF_binding_site|BDTNP1_TFBS_prd|FBsf0000274547);(TF_binding_site|BDTNP1_TFBS_sna|FBsf0000267933);(TF_binding_site|BDTNP1_TFBS_twi|FBsf0000199891);(TF_binding_site|mE1_TFBS_cad|FBsf0000247054)
2R_17107960_SNP	A	C	0.1244	24	169	0.00163636	0.000135599	4.74813e-05	0.762824	A	FBgn0034606	ASPP	SYNONYMOUS_CODING	0					SiteClass[FBgn0034606|ASPP|SYNONYMOUS_CODING|0],TranscriptAnnot[SYNONYMOUS_CODING(LOW|SILENT|gtT/gtG|V605|1020|ASPP|protein_coding|CODING|FBtr0071622|5|1);SYNONYMOUS_CODING(LOW|SILENT|gtT/gtG|V654|1069|ASPP|protein_coding|CODING|FBtr0071623|4|1);SYNONYMOUS_CODING(LOW|SILENT|gtT/gtG|V605|1046|ASPP|protein_coding|CODING|FBtr0330232|5|1)]	(TF_binding_site|mE1_TFBS_cad|FBsf0000247163);(TF_binding_site|mE1_TFBS_chinmo|FBsf0000211702)
2R_16355610_SNP	C	A	0.3757	71	118	0.000620096	0.000137658	2.26786e-05	0.973597	C	FBgn0086604	CG12484	INTRON	0					SiteClass[FBgn0086604|CG12484|INTRON|0],TranscriptAnnot[INTRON(MODIFIER||||736|CG12484|protein_coding|CODING|FBtr0112774|11|1);INTRON(MODIFIER||||1201|CG12484|protein_coding|CODING|FBtr0112775|11|1);INTRON(MODIFIER||||1194|CG12484|protein_coding|CODING|FBtr0273284|10|1);INTRON(MODIFIER||||1142|CG12484|protein_coding|CODING|FBtr0342690|10|1)]	-
2L_9354759_SNP	A	G	0.05759	11	180	0.000380162	0.000141789	1.60013e-05	0.920622	G	INTERGENIC		INTERGENIC						SiteClass[|||],TranscriptAnnot[INTERGENIC(MODIFIER||||||||||1)]	-
2R_15929695_SNP	C	T	0.4479	86	106	0.00087209	0.000167294	3.31351e-05	0.934827	C	INTERGENIC		INTERGENIC						SiteClass[|||],TranscriptAnnot[INTERGENIC(MODIFIER||||||||||1)]	(TF_binding_site|BDTNP1_TFBS_da|FBsf0000324836);(TF_binding_site|BDTNP1_TFBS_dl|FBsf0000303349);(TF_binding_site|BDTNP1_TFBS_Med|FBsf0000280980);(TF_binding_site|BDTNP1_TFBS_prd|FBsf0000274547);(TF_binding_site|BDTNP1_TFBS_sna|FBsf0000267933);(TF_binding_site|BDTNP1_TFBS_twi|FBsf0000199891);(TF_binding_site|mE1_TFBS_cad|FBsf0000247054)
3L_5726516_SNP	T	A	0.2194	43	153	0.00135565	0.000169462	4.68485e-05	0.841229	A	FBgn0085447	sif	INTRON	0					SiteClass[FBgn0085447|sif|INTRON|0],TranscriptAnnot[INTRON(MODIFIER||||2061|sif|protein_coding|CODING|FBtr0112710|12|1);INTRON(MODIFIER||||1270|sif|protein_coding|CODING|FBtr0330124|11|1);INTRON(MODIFIER||||2091|sif|protein_coding|CODING|FBtr0330125|24|1);INTRON(MODIFIER||||2646|sif|protein_coding|CODING|FBtr0330126|12|1);INTRON(MODIFIER||||2081|sif|protein_coding|CODING|FBtr0340654|25|1);INTRON(…	-
2R_17746780_SNP	T	C	0.399	77	116	0.00108645	0.000191712	4.25901e-05	0.910948	C	INTERGENIC		INTERGENIC						SiteClass[|||],TranscriptAnnot[INTERGENIC(MODIFIER||||||||||1)]	-
2L_6726555_SNP	A	C	0.1968	37	151	0.00035603	0.000214202	1.98328e-05	0.836439	C	FBgn0046704	Liprin-alpha	INTRON	0					SiteClass[FBgn0046704|Liprin-alpha|INTRON|0],TranscriptAnnot[INTRON(MODIFIER||||1201|Liprin-alpha|protein_coding|CODING|FBtr0079300|6|1);INTRON(MODIFIER||||1201|Liprin-alpha|protein_coding|CODING|FBtr0079301|6|1);INTRON(MODIFIER||||1158|Liprin-alpha|protein_coding|CODING|FBtr0329941|7|1);INTRON(MODIFIER||||1205|Liprin-alpha|protein_coding|CODING|FBtr0329942|7|1);INTRON(MODIFIER||||1214|Liprin-alp…	-
2R_19743016_SNP	T	A	0.4433	86	108	0.000916168	0.000233828	4.22867e-05	0.983006	A	FBgn0004581	bgcn	INTRON	0	FBgn0034918	wibg	DOWNSTREAM	461	SiteClass[FBgn0004581|bgcn|INTRON|0;FBgn0034918|wibg|DOWNSTREAM|461],TranscriptAnnot[DOWNSTREAM(MODIFIER||461||207|wibg|protein_coding|CODING|FBtr0072233||1);INTRON(MODIFIER||||1215|bgcn|protein_coding|CODING|FBtr0072232|2|1);INTRON(MODIFIER||||1210|bgcn|protein_coding|CODING|FBtr0344878|2|1)]	(TF_binding_site|BDTNP1_TFBS_da|FBsf0000325299);(TF_binding_site|BDTNP1_TFBS_Med|FBsf0000281424);(TF_binding_site|BDTNP1_TFBS_twi|FBsf0000200291);(TF_binding_site|mE1_TFBS_cad|FBsf0000247388);(TF_binding_site|mE1_TFBS_chinmo|FBsf0000211955);(TF_binding_site|mE1_TFBS_HSA|FBsf0000359951);(TF_binding_site|mE1_TFBS_sens|FBsf0000229668)
3L_14447009_DEL	G	GGTTTGAC	0.2088	38	144	0.000384181	0.000235085	2.22605e-05	0.835329	GGTTTGAC	FBgn0087007	bbg	INTRON	0					SiteClass[FBgn0087007|bbg|INTRON|0],TranscriptAnnot[INTRON(MODIFIER||||1101|bbg|protein_coding|CODING|FBtr0273423|1|1);INTRON(MODIFIER||||2637|bbg|protein_coding|CODING|FBtr0273422|4|1);INTRON(MODIFIER||||1842|bbg|protein_coding|CODING|FBtr0273427|2|1);INTRON(MODIFIER||||2637|bbg|protein_coding|CODING|FBtr0308596|4|1)]	(TF_binding_site|BDTNP1_TFBS_da|FBsf0000327038);(TF_binding_site|BDTNP1_TFBS_dl|FBsf0000307460);(TF_binding_site|BDTNP1_TFBS_hb|FBsf0000291421);(TF_binding_site|BDTNP1_TFBS_prd|FBsf0000275598);(TF_binding_site|BDTNP1_TFBS_sna|FBsf0000269428);(TF_binding_site|BDTNP1_TFBS_twi|FBsf0000203798);(TF_binding_site|mE1_TFBS_cad|FBsf0000245011);(TF_binding_site|mE1_TFBS_HSA|FBsf0000365198)
3L_10791714_SNP	A	T	0.06633	13	183	0.275402	0.000297093	0.188048	7.30003e-06	T	INTERGENIC		INTERGENIC						SiteClass[|||],TranscriptAnnot[INTERGENIC(MODIFIER||||||||||1)]	-
2R_16355588_SNP	T	C	0.356	68	123	0.000390515	0.000305417	2.66723e-05	0.792825	T	FBgn0086604	CG12484	INTRON	0					SiteClass[FBgn0086604|CG12484|INTRON|0],TranscriptAnnot[INTRON(MODIFIER||||736|CG12484|protein_coding|CODING|FBtr0112774|11|1);INTRON(MODIFIER||||1201|CG12484|protein_coding|CODING|FBtr0112775|11|1);INTRON(MODIFIER||||1194|CG12484|protein_coding|CODING|FBtr0273284|10|1);INTRON(MODIFIER||||1142|CG12484|protein_coding|CODING|FBtr0342690|10|1)]	-
3L_7935836_SNP	T	A	0.2526	49	145	1.44071e-06	0.000307819	6.11963e-07	0.140694	T	INTERGENIC		INTERGENIC						SiteClass[|||],TranscriptAnnot[INTERGENIC(MODIFIER||||||||||1)]	(TF_binding_site|mE1_TFBS_cad|FBsf0000244450)
2L_6726559_SNP	A	C	0.2011	38	151	0.000574789	0.000334623	3.7485e-05	0.854179	C	FBgn0046704	Liprin-alpha	INTRON	0					SiteClass[FBgn0046704|Liprin-alpha|INTRON|0],TranscriptAnnot[INTRON(MODIFIER||||1201|Liprin-alpha|protein_coding|CODING|FBtr0079300|6|1);INTRON(MODIFIER||||1201|Liprin-alpha|protein_coding|CODING|FBtr0079301|6|1);INTRON(MODIFIER||||1158|Liprin-alpha|protein_coding|CODING|FBtr0329941|7|1);INTRON(MODIFIER||||1205|Liprin-alpha|protein_coding|CODING|FBtr0329942|7|1);INTRON(MODIFIER||||1214|Liprin-alp…	-
3L_4390557_INS	G	GCGGTATCAGGTG	0.2235	40	139	0.000191858	0.000353711	1.76734e-05	0.636607	G	FBgn0035539	slow	CODON_CHANGE_PLUS_CODON_INSERTION	0					SiteClass[FBgn0035539|slow|CODON_CHANGE_PLUS_CODON_INSERTION|0],TranscriptAnnot[CODON_CHANGE_PLUS_CODON_INSERTION(MODERATE||gta/gCGGTATCAGGTGta|V23AVSGV|512|slow|protein_coding|CODING|FBtr0073291|2|1);CODON_CHANGE_PLUS_CODON_INSERTION(MODERATE||gta/gCGGTATCAGGTGta|V23AVSGV|512|slow|protein_coding|CODING|FBtr0073292|2|1)]	(TF_binding_site|mE1_TFBS_cad|FBsf0000244226);(TF_binding_site|mE1_TFBS_chinmo|FBsf0000209753)
2L_6366208_SNP	A	G	0.1615	31	161	0.000129	0.000411918	1.48406e-05	0.54684	G	INTERGENIC		INTERGENIC						SiteClass[|||],TranscriptAnnot[INTERGENIC(MODIFIER||||||||||1)]	-
2R_9239461_SNP	C	G	0.2435	47	146	0.00056018	0.000489307	4.6996e-05	0.780535	G	FBgn0265104	CR44206	INTRON	0					SiteClass[FBgn0265104|CR44206|INTRON|0],TranscriptAnnot[INTRON(MODIFIER|||||CR44206|ncRNA|NON_CODING|FBtr0344609|1|1)]	(TF_binding_site|mE1_TFBS_chinmo|FBsf0000211208);(TF_binding_site|mE1_TFBS_HSA|FBsf0000356303)
3L_10662143_SNP	C	T	0.1111	22	176	0.000130201	0.000523591	1.76101e-05	0.511458	T	FBgn0010762	simj	INTRON	0					SiteClass[FBgn0010762|simj|INTRON|0],TranscriptAnnot[INTRON(MODIFIER||||916|simj|protein_coding|CODING|FBtr0076262|2|1);INTRON(MODIFIER||||916|simj|protein_coding|CODING|FBtr0076263|1|1);INTRON(MODIFIER||||912|simj|protein_coding|CODING|FBtr0076264|1|1);INTRON(MODIFIER||||924|simj|protein_coding|CODING|FBtr0331573|1|1);INTRON(MODIFIER||||937|simj|protein_coding|CODING|FBtr0331574|1|1)]	(TF_binding_site|BDTNP1_TFBS_dl|FBsf0000306693);(TF_binding_site|mE1_TFBS_HSA|FBsf0000363979)
X_10816248_SNP	A	T	0.398	80	121	0.000399337	0.000585086	4.14932e-05	0.683106	A	FBgn0264502	CG43901	DOWNSTREAM	918					SiteClass[FBgn0264502|CG43901|DOWNSTREAM|918],TranscriptAnnot[UTR_3_PRIME(MODIFIER||1919||2281|CG43901|protein_coding|CODING|FBtr0332932|8|1);DOWNSTREAM(MODIFIER||918||2216|CG43901|protein_coding|CODING|FBtr0332933||1);DOWNSTREAM(MODIFIER||918||2215|CG43901|protein_coding|CODING|FBtr0344828||1)]	(TF_binding_site|BDTNP1_TFBS_dl|FBsf0000318273);(TF_binding_site|mE1_TFBS_HSA|FBsf0000381366)
2L_8390736_SNP	T	C	0.385	72	115	0.33058	0.00061642	0.198744	2.97641e-05	C	FBgn0262002	CG42820	SYNONYMOUS_CODING	0	FBgn0041717	snRNA:U6atac:29B	DOWNSTREAM	916	SiteClass[FBgn0262002|CG42820|SYNONYMOUS_CODING|0;FBgn0041717|snRNA:U6atac:29B|DOWNSTREAM|916],TranscriptAnnot[SYNONYMOUS_CODING(LOW|SILENT|ggG/ggA|G473|689|CG42820|protein_coding|CODING|FBtr0303799|3|1);DOWNSTREAM(MODIFIER||916|||snRNA:U6atac:29B|snRNA|NON_CODING|FBtr0079659||1)]	(TF_binding_site|BDTNP1_TFBS_twi|FBsf0000201222);(TF_binding_site|mE1_TFBS_HSA|FBsf0000346766)
2R_15928532_SNP	A	G	0.2165	42	152	4.18848e-05	0.000747251	1.05566e-05	0.316938	G	INTERGENIC		INTERGENIC						SiteClass[|||],TranscriptAnnot[INTERGENIC(MODIFIER||||||||||1)]	(TF_binding_site|BDTNP1_TFBS_bcd|FBsf0000333479);(TF_binding_site|BDTNP1_TFBS_da|FBsf0000324835);(TF_binding_site|BDTNP1_TFBS_dl|FBsf0000303348);(TF_binding_site|BDTNP1_TFBS_gt|FBsf0000293606);(TF_binding_site|BDTNP1_TFBS_hb|FBsf0000290301);(TF_binding_site|BDTNP1_TFBS_Med|FBsf0000280979);(TF_binding_site|BDTNP1_TFBS_prd|FBsf0000274547);(TF_binding_site|BDTNP1_TFBS_sna|FBsf0000267933);(TF_binding…
2L_6289963_SNP	T	A	0.08763	17	177	0.000284936	0.000881615	4.31803e-05	0.553489	A	FBgn0053531	Ddr	NON_SYNONYMOUS_CODING	0					SiteClass[FBgn0053531|Ddr|NON_SYNONYMOUS_CODING|0],TranscriptAnnot[NON_SYNONYMOUS_CODING(MODERATE|MISSENSE|aaA/aaT|K205N|380|Ddr|protein_coding|CODING|FBtr0340169|4|1);NON_SYNONYMOUS_CODING(MODERATE|MISSENSE|aaA/aaT|K205N|1054|Ddr|protein_coding|CODING|FBtr0344770|4|1);NON_SYNONYMOUS_CODING(MODERATE|MISSENSE|aaA/aaT|K205N|1054|Ddr|protein_coding|CODING|FBtr0344771|4|1)]	-
3L_7833067_SNP	G	A	0.4188	80	111	0.000318824	0.000913745	4.7815e-05	0.566445	A	FBgn0016694	Pdp1	INTRON	0					SiteClass[FBgn0016694|Pdp1|INTRON|0],TranscriptAnnot[INTRON(MODIFIER||||270|Pdp1|protein_coding|CODING|FBtr0076776|1|1);INTRON(MODIFIER||||232|Pdp1|protein_coding|CODING|FBtr0300499|2|1);INTRON(MODIFIER||||270|Pdp1|protein_coding|CODING|FBtr0306535|2|1);INTRON(MODIFIER||||275|Pdp1|protein_coding|CODING|FBtr0332081|1|1);INTRON(MODIFIER||||270|Pdp1|protein_coding|CODING|FBtr0346536|2|1);INTRON(MODI…	(regulatory_region|REDfly_CRMs|FBsf0000435665)
3L_7330162_SNP	G	A	0.4603	87	102	0.000198283	0.000948044	3.54126e-05	0.484171	G	FBgn0035766	eco	SYNONYMOUS_CODING	0					SiteClass[FBgn0035766|eco|SYNONYMOUS_CODING|0],TranscriptAnnot[SYNONYMOUS_CODING(LOW|SILENT|atC/atT|I610|1052|eco|protein_coding|CODING|FBtr0100278|1|1);SYNONYMOUS_CODING(LOW|SILENT|atC/atT|I610|1052|eco|protein_coding|CODING|FBtr0076882|3|1)]	(TF_binding_site|mE1_TFBS_cad|FBsf0000244409)
2R_13723567_SNP	T	G	0.4691	91	103	0.00012295	0.00103279	2.7241e-05	0.403611	T	FBgn0259211	grh	INTRON	0					SiteClass[FBgn0259211|grh|INTRON|0],TranscriptAnnot[INTRON(MODIFIER||||1063|grh|protein_coding|CODING|FBtr0299705|9|1);INTRON(MODIFIER||||1333|grh|protein_coding|CODING|FBtr0299706|11|1);INTRON(MODIFIER||||784|grh|protein_coding|CODING|FBtr0299707|9|1);INTRON(MODIFIER||||1032|grh|protein_coding|CODING|FBtr0300538|9|1);INTRON(MODIFIER||||1302|grh|protein_coding|CODING|FBtr0300539|11|1);INTRON(MODI…	-
3R_16357811_SNP	C	A	0.05851	11	177	0.000235548	0.00107572	4.34625e-05	0.49081	A	INTERGENIC		INTERGENIC						SiteClass[|||],TranscriptAnnot[INTERGENIC(MODIFIER||||||||||1)]	-
X_8962705_SNP	C	T	0.4278	83	111	9.41218e-05	0.00160424	3.13514e-05	0.31263	T	FBgn0030077	CG15365	UPSTREAM	689	FBgn0030078	CG10970	DOWNSTREAM	927	SiteClass[FBgn0030077|CG15365|UPSTREAM|689;FBgn0030078|CG10970|DOWNSTREAM|927],TranscriptAnnot[UPSTREAM(MODIFIER||689||821|CG15365|protein_coding|CODING|FBtr0071357||1);UPSTREAM(MODIFIER||689||828|CG15365|protein_coding|CODING|FBtr0339679||1);DOWNSTREAM(MODIFIER||927||103|CG10970|protein_coding|CODING|FBtr0346175||1);DOWNSTREAM(MODIFIER||930||103|CG10970|protein_coding|CODING|FBtr0071356||1);INTE…	(TF_binding_site|BDTNP1_TFBS_dl|FBsf0000317827);(TF_binding_site|mE1_TFBS_HSA|FBsf0000380796)
3L_2467579_SNP	G	A	0.3505	68	126	9.09224e-05	0.00160551	3.06697e-05	0.30871	G	FBgn0266696	CG45186	INTRON	0					SiteClass[FBgn0266696|CG45186|INTRON|0],TranscriptAnnot[INTRON(MODIFIER||||3040|CG45186|protein_coding|CODING|FBtr0345104|9|1);INTRON(MODIFIER||||1514|CG45186|protein_coding|CODING|FBtr0345105|4|1);INTRON(MODIFIER||||4526|CG45186|protein_coding|CODING|FBtr0345112|11|1);INTRON(MODIFIER||||1156|CG45186|protein_coding|CODING|FBtr0345106|1|1)]	(TF_binding_site|BDTNP1_TFBS_da|FBsf0000325838);(TF_binding_site|BDTNP1_TFBS_dl|FBsf0000305183);(TF_binding_site|BDTNP1_TFBS_gt|FBsf0000293764);(TF_binding_site|BDTNP1_TFBS_hb|FBsf0000291122);(TF_binding_site|BDTNP1_TFBS_Med|FBsf0000281958);(TF_binding_site|BDTNP1_TFBS_twi|FBsf0000202767);(TF_binding_site|mE1_TFBS_cad|FBsf0000244057);(TF_binding_site|mE1_TFBS_HSA|FBsf0000361496);(TF_binding_site|…
2R_13723757_SNP	C	A	0.4737	90	100	0.000118759	0.00162395	3.68302e-05	0.337758	A	FBgn0259211	grh	INTRON	0					SiteClass[FBgn0259211|grh|INTRON|0],TranscriptAnnot[INTRON(MODIFIER||||1063|grh|protein_coding|CODING|FBtr0299705|9|1);INTRON(MODIFIER||||1333|grh|protein_coding|CODING|FBtr0299706|11|1);INTRON(MODIFIER||||784|grh|protein_coding|CODING|FBtr0299707|9|1);INTRON(MODIFIER||||1032|grh|protein_coding|CODING|FBtr0300538|9|1);INTRON(MODIFIER||||1302|grh|protein_coding|CODING|FBtr0300539|11|1);INTRON(MODI…	(TF_binding_site|mE1_TFBS_cad|FBsf0000246906)
2R_11024532_SNP	G	C	0.3665	70	121	0.000122273	0.00174464	3.95452e-05	0.33184	C	FBgn0015371	chn	INTRON	0					SiteClass[FBgn0015371|chn|INTRON|0],TranscriptAnnot[INTRON(MODIFIER||||1108|chn|protein_coding|CODING|FBtr0087416|1|1);INTRON(MODIFIER||||1214|chn|protein_coding|CODING|FBtr0111006|1|1);INTRON(MODIFIER||||640|chn|protein_coding|CODING|FBtr0111007|1|1);INTRON(MODIFIER||||1286|chn|protein_coding|CODING|FBtr0305214|1|1);INTRON(MODIFIER||||572|chn|protein_coding|CODING|FBtr0305217|1|1);INTRON(MODIFIE…	(TF_binding_site|mE1_TFBS_HSA|FBsf0000356951);(TF_binding_site|mE1_TFBS_inv|FBsf0000236613)
2R_16217207_SNP	T	C	0.1495	29	165	0.238195	0.00194987	0.32536	4.32686e-05	C	FBgn0034504	CG8929	INTRON	0					SiteClass[FBgn0034504|CG8929|INTRON|0],TranscriptAnnot[SPLICE_SITE_REGION(LOW||||567|CG8929|protein_coding|CODING|FBtr0086283|4|1);SPLICE_SITE_REGION(LOW||||607|CG8929|protein_coding|CODING|FBtr0086284|5|1);SPLICE_SITE_REGION(LOW||||607|CG8929|protein_coding|CODING|FBtr0086285|4|1);SPLICE_SITE_REGION(LOW||||567|CG8929|protein_coding|CODING|FBtr0345355|3|1);INTRON(MODIFIER||||567|CG8929|protein_co…	(TF_binding_site|BDTNP1_TFBS_dl|FBsf0000303418);(TF_binding_site|mE1_TFBS_cad|FBsf0000247082);(TF_binding_site|mE1_TFBS_HSA|FBsf0000358693)
2R_15928565_SNP	A	G	0.201	39	155	0.000111908	0.00210284	4.27843e-05	0.298133	G	INTERGENIC		INTERGENIC						SiteClass[|||],TranscriptAnnot[INTERGENIC(MODIFIER||||||||||1)]	(TF_binding_site|BDTNP1_TFBS_bcd|FBsf0000333479);(TF_binding_site|BDTNP1_TFBS_da|FBsf0000324835);(TF_binding_site|BDTNP1_TFBS_dl|FBsf0000303348);(TF_binding_site|BDTNP1_TFBS_gt|FBsf0000293606);(TF_binding_site|BDTNP1_TFBS_hb|FBsf0000290301);(TF_binding_site|BDTNP1_TFBS_Med|FBsf0000280979);(TF_binding_site|BDTNP1_TFBS_prd|FBsf0000274547);(TF_binding_site|BDTNP1_TFBS_sna|FBsf0000267933);(TF_binding…
2R_19736250_SNP	C	G	0.2086	39	148	0.000122877	0.00218192	4.67077e-05	0.303812	G	FBgn0021895	ytr	SYNONYMOUS_CODING	0	FBgn0034915	eIF6	DOWNSTREAM	519	SiteClass[FBgn0021895|ytr|SYNONYMOUS_CODING|0;FBgn0034915|eIF6|DOWNSTREAM|519],TranscriptAnnot[SYNONYMOUS_CODING(LOW|SILENT|tcC/tcG|S105|194|ytr|protein_coding|CODING|FBtr0343278|4|1);SYNONYMOUS_CODING(LOW|SILENT|tcC/tcG|S105|194|ytr|protein_coding|CODING|FBtr0072234|3|1);DOWNSTREAM(MODIFIER||519||245|eIF6|protein_coding|CODING|FBtr0072235||1)]	(TF_binding_site|mE1_TFBS_chinmo|FBsf0000211953)
3L_2467590_SNP	A	T	0.3571	70	126	0.000103849	0.00234012	4.41139e-05	0.277262	A	FBgn0266696	CG45186	INTRON	0					SiteClass[FBgn0266696|CG45186|INTRON|0],TranscriptAnnot[INTRON(MODIFIER||||3040|CG45186|protein_coding|CODING|FBtr0345104|9|1);INTRON(MODIFIER||||1514|CG45186|protein_coding|CODING|FBtr0345105|4|1);INTRON(MODIFIER||||4526|CG45186|protein_coding|CODING|FBtr0345112|11|1);INTRON(MODIFIER||||1156|CG45186|protein_coding|CODING|FBtr0345106|1|1)]	(TF_binding_site|BDTNP1_TFBS_da|FBsf0000325838);(TF_binding_site|BDTNP1_TFBS_dl|FBsf0000305183);(TF_binding_site|BDTNP1_TFBS_gt|FBsf0000293764);(TF_binding_site|BDTNP1_TFBS_hb|FBsf0000291122);(TF_binding_site|BDTNP1_TFBS_Med|FBsf0000281958);(TF_binding_site|BDTNP1_TFBS_twi|FBsf0000202767);(TF_binding_site|mE1_TFBS_cad|FBsf0000244057);(TF_binding_site|mE1_TFBS_HSA|FBsf0000361496);(TF_binding_site|…
2R_13723752_SNP	A	T	0.474	91	101	5.91821e-05	0.00244088	3.17892e-05	0.219866	T	FBgn0259211	grh	INTRON	0					SiteClass[FBgn0259211|grh|INTRON|0],TranscriptAnnot[INTRON(MODIFIER||||1063|grh|protein_coding|CODING|FBtr0299705|9|1);INTRON(MODIFIER||||1333|grh|protein_coding|CODING|FBtr0299706|11|1);INTRON(MODIFIER||||784|grh|protein_coding|CODING|FBtr0299707|9|1);INTRON(MODIFIER||||1032|grh|protein_coding|CODING|FBtr0300538|9|1);INTRON(MODIFIER||||1302|grh|protein_coding|CODING|FBtr0300539|11|1);INTRON(MODI…	(TF_binding_site|mE1_TFBS_cad|FBsf0000246906)
X_15479915_SNP	T	C	0.148	29	167	3.7088e-05	0.00290898	2.7121e-05	0.16797	C	FBgn0030662	CG9220	UTR_3_PRIME	0	FBgn0030660	CG8097	DOWNSTREAM	633	SiteClass[FBgn0030662|CG9220|UTR_3_PRIME|0;FBgn0030660|CG8097|DOWNSTREAM|633],TranscriptAnnot[UTR_3_PRIME(MODIFIER||112||832|CG9220|protein_coding|CODING|FBtr0340347|5|1);UTR_3_PRIME(MODIFIER||112||832|CG9220|protein_coding|CODING|FBtr0074064|5|1);DOWNSTREAM(MODIFIER||864||446|CG8097|protein_coding|CODING|FBtr0074047||1);DOWNSTREAM(MODIFIER||633||446|CG8097|protein_coding|CODING|FBtr0340344||1)]	(TF_binding_site|mE1_TFBS_cad|FBsf0000243462)
X_8333841_SNP	C	A	0.254	48	141	0.0785706	0.00313762	0.579652	4.7481e-06	A	FBgn0030038	CG1440	INTRON	0					SiteClass[FBgn0030038|CG1440|INTRON|0],TranscriptAnnot[INTRON(MODIFIER||||488|CG1440|protein_coding|CODING|FBtr0071197|2|1);INTRON(MODIFIER||||368|CG1440|protein_coding|CODING|FBtr0112961|2|1);INTRON(MODIFIER||||511|CG1440|protein_coding|CODING|FBtr0112962|1|1);INTRON(MODIFIER||||551|CG1440|protein_coding|CODING|FBtr0339438|2|1)]	(TF_binding_site|mE1_TFBS_sens|FBsf0000220170)
2L_20505364_SNP	A	G	0.07107	14	183	6.47385e-05	0.00334059	4.27326e-05	0.196175	G	INTERGENIC		INTERGENIC						SiteClass[|||],TranscriptAnnot[INTERGENIC(MODIFIER||||||||||1)]	-
2R_12247101_SNP	A	G	0.3627	70	123	1.63843e-05	0.00382168	2.04129e-05	0.10297	G	FBgn0266861	CR45322	UPSTREAM	101	FBgn0034121	CG6262	UPSTREAM	134	SiteClass[FBgn0266861|CR45322|UPSTREAM|101;FBgn0034121|CG6262|UPSTREAM|134],TranscriptAnnot[UPSTREAM(MODIFIER||134||867|CG6262|protein_coding|CODING|FBtr0087151||1);UPSTREAM(MODIFIER||134||1042|CG6262|protein_coding|CODING|FBtr0087152||1);UPSTREAM(MODIFIER||101|||CR45322|ncRNA|NON_CODING|FBtr0345670||1);INTERGENIC(MODIFIER||||||||||1)]	-
2R_11163548_SNP	C	T	0.4811	89	96	5.44899e-05	0.00426553	4.63927e-05	0.161423	T	FBgn0265194	Trpm	INTRON	0					SiteClass[FBgn0265194|Trpm|INTRON|0],TranscriptAnnot[INTRON(MODIFIER||||1939|Trpm|protein_coding|CODING|FBtr0339074|14|1);INTRON(MODIFIER||||1131|Trpm|protein_coding|CODING|FBtr0339075|12|1);INTRON(MODIFIER||||1921|Trpm|protein_coding|CODING|FBtr0339076|12|1);INTRON(MODIFIER||||2023|Trpm|protein_coding|CODING|FBtr0339077|12|1);INTRON(MODIFIER||||1996|Trpm|protein_coding|CODING|FBtr0339078|12|1);I…	-
2R_15905848_SNP	T	C	0.3529	66	121	3.2227e-05	0.00429357	3.37914e-05	0.128863	T	INTERGENIC		INTERGENIC						SiteClass[|||],TranscriptAnnot[INTERGENIC(MODIFIER||||||||||1)]	(TF_binding_site|mE1_TFBS_cad|FBsf0000247052);(TF_binding_site|mE1_TFBS_chinmo|FBsf0000211607)
X_17576563_SNP	T	C	0.07576	15	183	2.4286e-05	0.00461217	3.01452e-05	0.109493	C	FBgn0263258	chas	INTRON	0					SiteClass[FBgn0263258|chas|INTRON|0],TranscriptAnnot[UTR_5_PRIME(MODIFIER||5420||1031|chas|protein_coding|CODING|FBtr0340636|1|1);UTR_5_PRIME(MODIFIER||5420||1031|chas|protein_coding|CODING|FBtr0074478|1|1);INTRON(MODIFIER||||1359|chas|protein_coding|CODING|FBtr0074477|5|1);INTRON(MODIFIER||||1359|chas|protein_coding|CODING|FBtr0340634|6|1);INTRON(MODIFIER||||1558|chas|protein_coding|CODING|FBtr0…	(TF_binding_site|BDTNP1_TFBS_dl|FBsf0000319855);(TF_binding_site|mE1_TFBS_HSA|FBsf0000348939);(TF_binding_site|mE1_TFBS_Trl|FBsf0000343131)
3L_10508710_INS	AG	A	0.3608	70	124	0.0841379	0.0048	0.616366	1.02115e-05	A	FBgn0052062	A2bp1	INTRON	0					SiteClass[FBgn0052062|A2bp1|INTRON|0],TranscriptAnnot[UPSTREAM(MODIFIER||392||865|A2bp1|protein_coding|CODING|FBtr0113418||1);UPSTREAM(MODIFIER||392||763|A2bp1|protein_coding|CODING|FBtr0113419||1);UPSTREAM(MODIFIER||392||796|A2bp1|protein_coding|CODING|FBtr0305094||1);UPSTREAM(MODIFIER||392||889|A2bp1|protein_coding|CODING|FBtr0305095||1);UPSTREAM(MODIFIER||392||921|A2bp1|protein_coding|CODING|F…	(TF_binding_site|BDTNP1_TFBS_dl|FBsf0000306666);(TF_binding_site|BDTNP1_TFBS_hb|FBsf0000291309);(TF_binding_site|BDTNP1_TFBS_Med|FBsf0000282684);(TF_binding_site|BDTNP1_TFBS_twi|FBsf0000203404);(TF_binding_site|mE1_TFBS_HSA|FBsf0000363937)
2R_12917627_SNP	A	G	0.2222	44	154	0.109869	0.00514713	0.57098	2.10643e-05	G	FBgn0023172	RhoGEF2	INTRON	0					SiteClass[FBgn0023172|RhoGEF2|INTRON|0],TranscriptAnnot[INTRON(MODIFIER||||2205|RhoGEF2|protein_coding|CODING|FBtr0086969|2|1);INTRON(MODIFIER||||2559|RhoGEF2|protein_coding|CODING|FBtr0086970|2|1);INTRON(MODIFIER||||2559|RhoGEF2|protein_coding|CODING|FBtr0086971|2|1);INTRON(MODIFIER||||2557|RhoGEF2|protein_coding|CODING|FBtr0305083|2|1);INTRON(MODIFIER||||2456|RhoGEF2|protein_coding|CODING|FBtr0…	-
3R_23529975_SNP	C	A	0.467	85	97	0.111306	0.00581985	0.58306	2.57329e-05	A	FBgn0039543	CG12428	NON_SYNONYMOUS_CODING	0	FBgn0045862	btz	DOWNSTREAM	808	SiteClass[FBgn0039543|CG12428|NON_SYNONYMOUS_CODING|0;FBgn0045862|btz|DOWNSTREAM|808],TranscriptAnnot[NON_SYNONYMOUS_CODING(MODERATE|MISSENSE|Tcc/Gcc|S462A|618|CG12428|protein_coding|CODING|FBtr0085236|5|1);NON_SYNONYMOUS_CODING(MODERATE|MISSENSE|Tcc/Gcc|S462A|618|CG12428|protein_coding|CODING|FBtr0085238|5|1);NON_SYNONYMOUS_CODING(MODERATE|MISSENSE|Tcc/Gcc|S462A|618|CG12428|protein_coding|CODING…	(TF_binding_site|mE1_TFBS_chinmo|FBsf0000213504);(TF_binding_site|mE1_TFBS_HSA|FBsf0000375816)
2L_4305977_SNP	A	G	0.3722	67	113	0.111812	0.00615472	0.588951	2.80981e-05	G	FBgn0010473	tutl	DOWNSTREAM	282					SiteClass[FBgn0010473|tutl|DOWNSTREAM|282],TranscriptAnnot[DOWNSTREAM(MODIFIER||282||377|tutl|protein_coding|CODING|FBtr0089268||1);INTRON(MODIFIER||||903|tutl|protein_coding|CODING|FBtr0089269|6|1);INTRON(MODIFIER||||1508|tutl|protein_coding|CODING|FBtr0089270|6|1);INTRON(MODIFIER||||902|tutl|protein_coding|CODING|FBtr0089271|6|1);INTRON(MODIFIER||||963|tutl|protein_coding|CODING|FBtr0301863|6|1…	(TF_binding_site|mE1_TFBS_chinmo|FBsf0000207158)
3R_24910783_SNP	C	T	0.1237	23	163	3.92638e-05	0.00664289	5.40882e-05	0.108986	T	FBgn0039633	CG11873	INTRON	0					SiteClass[FBgn0039633|CG11873|INTRON|0],TranscriptAnnot[INTRON(MODIFIER||||2976|CG11873|protein_coding|CODING|FBtr0085365|2|1);INTRON(MODIFIER||||3003|CG11873|protein_coding|CODING|FBtr0330299|2|1);INTRON(MODIFIER||||2976|CG11873|protein_coding|CODING|FBtr0330301|1|1)]	-
2R_17852052_SNP	A	G	0.268	52	142	3.43889e-05	0.00687483	5.13788e-05	0.100533	G	FBgn0085398	ppk9	SYNONYMOUS_CODING	0					SiteClass[FBgn0085398|ppk9|SYNONYMOUS_CODING|0],TranscriptAnnot[SYNONYMOUS_CODING(LOW|SILENT|ggG/ggA|G125|599|ppk9|protein_coding|CODING|FBtr0112594|1|1);SYNONYMOUS_CODING(LOW|SILENT|ggG/ggA|G125|591|ppk9|protein_coding|CODING|FBtr0344888|1|1)]	(TF_binding_site|mE1_TFBS_chinmo|FBsf0000211737);(TF_binding_site|mE1_TFBS_HSA|FBsf0000359243)
2L_7041758_SNP	C	A	0.06915	13	175	4.835e-05	0.00711889	6.48206e-05	0.114741	A	FBgn0262872	milt	INTRON	0					SiteClass[FBgn0262872|milt|INTRON|0],TranscriptAnnot[UPSTREAM(MODIFIER||601||1256|milt|protein_coding|CODING|FBtr0306231||1);UPSTREAM(MODIFIER||601||1256|milt|protein_coding|CODING|FBtr0306233||1);INTRON(MODIFIER||||1116|milt|protein_coding|CODING|FBtr0306228|3|1);INTRON(MODIFIER||||1116|milt|protein_coding|CODING|FBtr0306229|3|1)]	(TF_binding_site|BDTNP1_TFBS_dl|FBsf0000297197);(TF_binding_site|BDTNP1_TFBS_twi|FBsf0000201095);(TF_binding_site|mE1_TFBS_HSA|FBsf0000346294)
3R_23521103_SNP	C	A	0.4737	90	100	0.0757074	0.00724889	0.690352	1.45345e-05	A	FBgn0263025	CG43320	NON_SYNONYMOUS_CODING	0	FBgn0263597	Acp98AB	DOWNSTREAM	330	SiteClass[FBgn0263025|CG43320|NON_SYNONYMOUS_CODING|0;FBgn0263597|Acp98AB|DOWNSTREAM|330;FBgn0263024|CG43319|DOWNSTREAM|840],TranscriptAnnot[NON_SYNONYMOUS_CODING(MODERATE|MISSENSE|Aag/Cag|K43Q|398|CG43320|protein_coding|CODING|FBtr0306924|1|1);DOWNSTREAM(MODIFIER||840||57|CG43319|protein_coding|CODING|FBtr0306923||1);DOWNSTREAM(MODIFIER||330||25|Acp98AB|protein_coding|CODING|FBtr0310089||1)]	-
2L_6934918_SNP	G	A	0.1186	23	171	1.75696e-05	0.00799231	3.91594e-05	0.0668234	A	FBgn0031869	CG18304	INTRON	0					SiteClass[FBgn0031869|CG18304|INTRON|0],TranscriptAnnot[INTRON(MODIFIER||||1895|CG18304|protein_coding|CODING|FBtr0079367|9|1);INTRON(MODIFIER||||1819|CG18304|protein_coding|CODING|FBtr0306285|9|1);INTRON(MODIFIER||||1813|CG18304|protein_coding|CODING|FBtr0332326|9|1);INTRON(MODIFIER||||1901|CG18304|protein_coding|CODING|FBtr0332327|9|1)]	(TF_binding_site|mE1_TFBS_cad|FBsf0000241573)
2R_18947747_SNP	C	T	0.1719	33	159	4.93747e-06	0.0088038	2.04999e-05	0.0337035	T	FBgn0265187	CG44252	SYNONYMOUS_CODING	0					SiteClass[FBgn0265187|CG44252|SYNONYMOUS_CODING|0],TranscriptAnnot[SYNONYMOUS_CODING(LOW|SILENT|ggT/ggC|G390|714|CG44252|protein_coding|CODING|FBtr0339109|5|1);SYNONYMOUS_CODING(LOW|SILENT|ggT/ggC|G390|714|CG44252|protein_coding|CODING|FBtr0339108|5|1);SYNONYMOUS_CODING(LOW|SILENT|ggT/ggC|G379|703|CG44252|protein_coding|CODING|FBtr0339110|4|1)]	(TF_binding_site|mE1_TFBS_chinmo|FBsf0000211850);(TF_binding_site|mE1_TFBS_HSA|FBsf0000359645)
3L_10859563_SNP	C	T	0.05025	10	189	1.69032e-06	0.00920678	1.16909e-05	0.0189628	C	FBgn0026160	tna	INTRON	0					SiteClass[FBgn0026160|tna|INTRON|0],TranscriptAnnot[INTRON(MODIFIER||||1135|tna|protein_coding|CODING|FBtr0076267|1|1);INTRON(MODIFIER||||1109|tna|protein_coding|CODING|FBtr0301658|1|1)]	-
2R_11303714_SNP	G	A	0.4973	92	93	0.0322332	0.00993277	0.904339	3.75061e-06	G	FBgn0263980	CG43729	INTRON	0					SiteClass[FBgn0263980|CG43729|INTRON|0],TranscriptAnnot[NON_SYNONYMOUS_CODING(MODERATE|MISSENSE|cGc/cAc|R17H|1951|CG43729|protein_coding|CODING|FBtr0330012|3|1);NON_SYNONYMOUS_CODING(MODERATE|MISSENSE|cGc/cAc|R17H|1166|CG43729|protein_coding|CODING|FBtr0330011|3|1);NON_SYNONYMOUS_CODING(MODERATE|MISSENSE|cGc/cAc|R17H|818|CG43729|protein_coding|CODING|FBtr0330007|3|1);NON_SYNONYMOUS_CODING(MODERAT…	(TF_binding_site|mE1_TFBS_cad|FBsf0000246724);(TF_binding_site|mE1_TFBS_chinmo|FBsf0000211336);(TF_binding_site|mE1_TFBS_HSA|FBsf0000357034)
3L_12075267_INS	T	TTT	0.3277	58	119	3.688e-05	0.0102475	7.44665e-05	0.0801875	T	FBgn0250876	Sema-5c	UPSTREAM	338					SiteClass[FBgn0250876|Sema-5c|UPSTREAM|338],TranscriptAnnot[UPSTREAM(MODIFIER||338||1093|Sema-5c|protein_coding|CODING|FBtr0076052||1);UPSTREAM(MODIFIER||338||1091|Sema-5c|protein_coding|CODING|FBtr0300339||1);INTERGENIC(MODIFIER||||||||||1)]	(TF_binding_site|BDTNP1_TFBS_da|FBsf0000326735);(TF_binding_site|BDTNP1_TFBS_dl|FBsf0000306979);(TF_binding_site|BDTNP1_TFBS_hb|FBsf0000291353);(TF_binding_site|BDTNP1_TFBS_Med|FBsf0000282849);(TF_binding_site|BDTNP1_TFBS_twi|FBsf0000203534);(TF_binding_site|mE1_TFBS_cad|FBsf0000244805);(TF_binding_site|mE1_TFBS_HSA|FBsf0000364442);(TF_binding_site|mE1_TFBS_Trl|FBsf0000339878)
3L_8796170_SNP	T	A	0.08205	16	179	2.2373e-05	0.0109502	5.88761e-05	0.0601819	A	FBgn0085455	CG34426	SYNONYMOUS_CODING	0	FBgn0052023	CG32023	DOWNSTREAM	532	SiteClass[FBgn0085455|CG34426|SYNONYMOUS_CODING|0;FBgn0052023|CG32023|DOWNSTREAM|532;FBgn0035929|CG13311|UPSTREAM|906],TranscriptAnnot[SYNONYMOUS_CODING(LOW|SILENT|acA/acT|T183|296|CG34426|protein_coding|CODING|FBtr0112727|2|1);UPSTREAM(MODIFIER||906||153|CG13311|protein_coding|CODING|FBtr0076589||1);DOWNSTREAM(MODIFIER||532||160|CG32023|protein_coding|CODING|FBtr0076588||1)]	-
2L_8933754_SNP	A	G	0.1546	30	164	3.58809e-05	0.0110087	7.78139e-05	0.0753537	G	FBgn0085427	CG34398	DOWNSTREAM	160	FBgn0032074	Tsp29Fa	UPSTREAM	208	SiteClass[FBgn0085427|CG34398|DOWNSTREAM|160;FBgn0032074|Tsp29Fa|UPSTREAM|208],TranscriptAnnot[UPSTREAM(MODIFIER||208||248|Tsp29Fa|protein_coding|CODING|FBtr0300289||1);UPSTREAM(MODIFIER||210||248|Tsp29Fa|protein_coding|CODING|FBtr0079754||1);DOWNSTREAM(MODIFIER||372||1784|CG34398|protein_coding|CODING|FBtr0303890||1);DOWNSTREAM(MODIFIER||372||1611|CG34398|protein_coding|CODING|FBtr0303891||1);DO…	-
3L_768427_SNP	A	C	0.1608	32	167	0.0953367	0.0110517	0.699722	4.46696e-05	C	INTERGENIC		INTERGENIC						SiteClass[|||],TranscriptAnnot[INTERGENIC(MODIFIER||||||||||1)]	-
X_17577906_SNP	T	C	0.06633	13	183	8.90333e-06	0.011066	3.50564e-05	0.0378616	C	FBgn0263258	chas	INTRON	0					SiteClass[FBgn0263258|chas|INTRON|0],TranscriptAnnot[UPSTREAM(MODIFIER||951||1031|chas|protein_coding|CODING|FBtr0074478||1);UPSTREAM(MODIFIER||951||1031|chas|protein_coding|CODING|FBtr0340636||1);INTRON(MODIFIER||||1359|chas|protein_coding|CODING|FBtr0074477|5|1);INTRON(MODIFIER||||1359|chas|protein_coding|CODING|FBtr0340634|6|1);INTRON(MODIFIER||||1558|chas|protein_coding|CODING|FBtr0340635|4|1…	(TF_binding_site|mE1_TFBS_HSA|FBsf0000348940)
3L_18445868_SNP	C	T	0.06122	12	184	2.00148e-05	0.0112564	5.65313e-05	0.055861	C	INTERGENIC		INTERGENIC						SiteClass[|||],TranscriptAnnot[INTERGENIC(MODIFIER||||||||||1)]	(TF_binding_site|BDTNP1_TFBS_dl|FBsf0000308402);(TF_binding_site|BDTNP1_TFBS_twi|FBsf0000204205);(TF_binding_site|mE1_TFBS_HSA|FBsf0000366566)
X_19902916_SNP	C	G	0.4845	78	83	0.0316054	0.011342	0.927968	4.46807e-06	G	FBgn0053517	Dop2R	INTRON	0					SiteClass[FBgn0053517|Dop2R|INTRON|0],TranscriptAnnot[NON_SYNONYMOUS_CODING(MODERATE|MISSENSE|gaC/gaG|D738E|904|Dop2R|protein_coding|CODING|FBtr0343170|8|1);NON_SYNONYMOUS_CODING(MODERATE|MISSENSE|gaC/gaG|D739E|905|Dop2R|protein_coding|CODING|FBtr0343169|8|1);NON_SYNONYMOUS_CODING(MODERATE|MISSENSE|gaC/gaG|D308E|466|Dop2R|protein_coding|CODING|FBtr0070034|6|1);NON_SYNONYMOUS_CODING(MODERATE|MISSE…	-
3L_7839918_SNP	T	A	0.4375	84	108	3.17968e-05	0.0114185	7.47957e-05	0.0692941	T	FBgn0016694	Pdp1	INTRON	0					SiteClass[FBgn0016694|Pdp1|INTRON|0],TranscriptAnnot[INTRON(MODIFIER||||270|Pdp1|protein_coding|CODING|FBtr0076776|1|1);INTRON(MODIFIER||||232|Pdp1|protein_coding|CODING|FBtr0300499|2|1);INTRON(MODIFIER||||270|Pdp1|protein_coding|CODING|FBtr0306535|2|1);INTRON(MODIFIER||||275|Pdp1|protein_coding|CODING|FBtr0332081|1|1);INTRON(MODIFIER||||270|Pdp1|protein_coding|CODING|FBtr0346536|2|1);INTRON(MODI…	(regulatory_region|REDfly_CRMs|FBsf0000435665)
3L_8073568_SNP	T	C	0.4103	80	115	0.0758511	0.0120799	0.761303	3.09433e-05	C	FBgn0262579	Ect4	INTRON	0					SiteClass[FBgn0262579|Ect4|INTRON|0],TranscriptAnnot[INTRON(MODIFIER||||1730|Ect4|protein_coding|CODING|FBtr0304998|3|1);INTRON(MODIFIER||||1704|Ect4|protein_coding|CODING|FBtr0333948|2|1);INTRON(MODIFIER||||1637|Ect4|protein_coding|CODING|FBtr0304993|1|1);INTRON(MODIFIER||||1562|Ect4|protein_coding|CODING|FBtr0304996|2|1)]	(TF_binding_site|BDTNP1_TFBS_dl|FBsf0000306171)
2L_6468348_SNP	A	G	0.1005	19	170	0.0810997	0.0134059	0.762375	4.16726e-05	G	FBgn0259749	mmy	DOWNSTREAM	190	FBgn0031817	CG9531	UPSTREAM	650	SiteClass[FBgn0259749|mmy|DOWNSTREAM|190;FBgn0031817|CG9531|UPSTREAM|650],TranscriptAnnot[UPSTREAM(MODIFIER||650||323|CG9531|protein_coding|CODING|FBtr0079270||1);UPSTREAM(MODIFIER||650||323|CG9531|protein_coding|CODING|FBtr0331185||1);DOWNSTREAM(MODIFIER||190||483|mmy|protein_coding|CODING|FBtr0079269||1);DOWNSTREAM(MODIFIER||190||483|mmy|protein_coding|CODING|FBtr0339787||1);DOWNSTREAM(MODIFIER…	-
3L_768428_SNP	G	T	0.1558	31	168	0.0655525	0.0135005	0.808532	2.68005e-05	T	INTERGENIC		INTERGENIC						SiteClass[|||],TranscriptAnnot[INTERGENIC(MODIFIER||||||||||1)]	-
2R_12918620_SNP	T	G	0.2984	57	134	0.0489726	0.0141347	0.875592	1.56609e-05	G	FBgn0023172	RhoGEF2	INTRON	0					SiteClass[FBgn0023172|RhoGEF2|INTRON|0],TranscriptAnnot[INTRON(MODIFIER||||2205|RhoGEF2|protein_coding|CODING|FBtr0086969|2|1);INTRON(MODIFIER||||2559|RhoGEF2|protein_coding|CODING|FBtr0086970|2|1);INTRON(MODIFIER||||2559|RhoGEF2|protein_coding|CODING|FBtr0086971|2|1);INTRON(MODIFIER||||2557|RhoGEF2|protein_coding|CODING|FBtr0305083|2|1);INTRON(MODIFIER||||2456|RhoGEF2|protein_coding|CODING|FBtr0…	-
2R_15905759_SNP	A	G	0.3228	61	128	6.59156e-06	0.0143077	3.72501e-05	0.026351	A	INTERGENIC		INTERGENIC						SiteClass[|||],TranscriptAnnot[INTERGENIC(MODIFIER||||||||||1)]	(TF_binding_site|mE1_TFBS_cad|FBsf0000247052);(TF_binding_site|mE1_TFBS_chinmo|FBsf0000211607)
3L_19180226_SNP	G	T	0.1518	29	162	2.99998e-05	0.0152194	9.24795e-05	0.0545329	G	FBgn0016797	fz2	INTRON	0					SiteClass[FBgn0016797|fz2|INTRON|0],TranscriptAnnot[INTRON(MODIFIER||||694|fz2|protein_coding|CODING|FBtr0299586|4|1);INTRON(MODIFIER||||694|fz2|protein_coding|CODING|FBtr0330194|3|1)]	-
3L_5888194_SNP	G	A	0.3523	68	125	3.0758e-05	0.0152551	9.39987e-05	0.0551248	G	FBgn0035644	Pole2	DOWNSTREAM	597					SiteClass[FBgn0035644|Pole2|DOWNSTREAM|597],TranscriptAnnot[DOWNSTREAM(MODIFIER||597||525|Pole2|protein_coding|CODING|FBtr0077081||1);INTERGENIC(MODIFIER||||||||||1)]	(TF_binding_site|BDTNP1_TFBS_da|FBsf0000326181);(TF_binding_site|BDTNP1_TFBS_twi|FBsf0000203028);(TF_binding_site|mE1_TFBS_HSA|FBsf0000362509)
2L_6588001_SNP	A	C	0.2011	36	143	0.0255612	0.016007	0.978722	5.16055e-06	A	FBgn0031835	CG11319	INTRON	0					SiteClass[FBgn0031835|CG11319|INTRON|0],TranscriptAnnot[INTRON(MODIFIER||||935|CG11319|protein_coding|CODING|FBtr0089641|1|1);INTRON(MODIFIER||||940|CG11319|protein_coding|CODING|FBtr0343159|1|1);INTRON(MODIFIER||||935|CG11319|protein_coding|CODING|FBtr0343160|1|1)]	-
2L_2667045_SNP	G	A	0.3613	69	122	0.0436343	0.0166455	0.924397	1.60342e-05	A	FBgn0031444	CG9879	DOWNSTREAM	780					SiteClass[FBgn0031444|CG9879|DOWNSTREAM|780],TranscriptAnnot[DOWNSTREAM(MODIFIER||780||331|CG9879|protein_coding|CODING|FBtr0077700||1);INTERGENIC(MODIFIER||||||||||1)]	-
2R_17483401_SNP	A	T	0.3608	70	124	2.28997e-05	0.0170659	8.76589e-05	0.0434418	T	INTERGENIC		INTERGENIC						SiteClass[|||],TranscriptAnnot[INTERGENIC(MODIFIER||||||||||1)]	-
3L_7719617_SNP	T	C	0.1939	38	158	1.48311e-05	0.0170864	6.87314e-05	0.0346425	C	FBgn0052373	CG32373	INTRON	0	FBgn0035812	CG7457	UPSTREAM	44	SiteClass[FBgn0052373|CG32373|INTRON|0;FBgn0035812|CG7457|UPSTREAM|44],TranscriptAnnot[UPSTREAM(MODIFIER||44||1405|CG7457|protein_coding|CODING|FBtr0076814||1);INTRON(MODIFIER||||486|CG32373|protein_coding|CODING|FBtr0076806|1|1);INTRON(MODIFIER||||486|CG32373|protein_coding|CODING|FBtr0076805|1|1)]	(TF_binding_site|BDTNP1_TFBS_dl|FBsf0000306097);(TF_binding_site|mE1_TFBS_HSA|FBsf0000363055)
X_1190617_DEL	C	CAACC	0.07071	14	184	3.58072e-05	0.0178486	0.000117455	0.052751	CAACC	FBgn0025641	DAAM	INTRON	0					SiteClass[FBgn0025641|DAAM|INTRON|0],TranscriptAnnot[INTRON(MODIFIER||||1153|DAAM|protein_coding|CODING|FBtr0310282|2|1);INTRON(MODIFIER||||1153|DAAM|protein_coding|CODING|FBtr0310283|1|1);INTRON(MODIFIER||||1463|DAAM|protein_coding|CODING|FBtr0303264|1|1);INTRON(MODIFIER||||1153|DAAM|protein_coding|CODING|FBtr0070239|3|1);INTRON(MODIFIER||||1153|DAAM|protein_coding|CODING|FBtr0342731|2|1)]	(TF_binding_site|mE1_TFBS_chinmo|FBsf0000208004)
3L_770528_SNP	G	T	0.2081	41	156	0.0679321	0.0179078	0.844552	4.4375e-05	T	FBgn0052481	tRNA:CR32481	DOWNSTREAM	66	FBgn0052480	tRNA:CR32480	DOWNSTREAM	928	SiteClass[FBgn0052481|tRNA:CR32481|DOWNSTREAM|66;FBgn0052480|tRNA:CR32480|DOWNSTREAM|928],TranscriptAnnot[DOWNSTREAM(MODIFIER||928|||tRNA:CR32480|tRNA|NON_CODING|FBtr0072579||1);DOWNSTREAM(MODIFIER||66|||tRNA:CR32481|tRNA|NON_CODING|FBtr0072580||1);INTERGENIC(MODIFIER||||||||||1)]	(TF_binding_site|BDTNP1_TFBS_dl|FBsf0000304861);(TF_binding_site|BDTNP1_TFBS_twi|FBsf0000202613);(TF_binding_site|mE1_TFBS_HSA|FBsf0000360868)
X_1188254_SNP	C	G	0.08586	17	181	1.67397e-05	0.0191345	8.13931e-05	0.0335615	G	FBgn0025641	DAAM	SYNONYMOUS_CODING	0					SiteClass[FBgn0025641|DAAM|SYNONYMOUS_CODING|0],TranscriptAnnot[SYNONYMOUS_CODING(LOW|SILENT|acC/acG|T37|1153|DAAM|protein_coding|CODING|FBtr0342731|4|1);SYNONYMOUS_CODING(LOW|SILENT|acC/acG|T347|1463|DAAM|protein_coding|CODING|FBtr0303264|3|1);SYNONYMOUS_CODING(LOW|SILENT|acC/acG|T37|1153|DAAM|protein_coding|CODING|FBtr0070239|5|1);SYNONYMOUS_CODING(LOW|SILENT|acC/acG|T37|1153|DAAM|protein_codin…	(TF_binding_site|mE1_TFBS_chinmo|FBsf0000208004);(TF_binding_site|mE1_TFBS_HSA|FBsf0000378054)
3R_23521117_SNP	C	T	0.4439	83	104	0.0436992	0.0196975	0.951121	2.10801e-05	T	FBgn0263025	CG43320	SYNONYMOUS_CODING	0	FBgn0263597	Acp98AB	DOWNSTREAM	344	SiteClass[FBgn0263025|CG43320|SYNONYMOUS_CODING|0;FBgn0263597|Acp98AB|DOWNSTREAM|344;FBgn0263024|CG43319|DOWNSTREAM|854],TranscriptAnnot[SYNONYMOUS_CODING(LOW|SILENT|tgT/tgC|C47|398|CG43320|protein_coding|CODING|FBtr0306924|1|1);DOWNSTREAM(MODIFIER||854||57|CG43319|protein_coding|CODING|FBtr0306923||1);DOWNSTREAM(MODIFIER||344||25|Acp98AB|protein_coding|CODING|FBtr0310089||1)]	-
3R_18024212_DEL	G	GCAGAGAGA	0.1354	26	166	0.0516268	0.0212709	0.929762	3.32467e-05	GCAGAGAGA	FBgn0266751	CR45224	INTRON	0	FBgn0051163	SKIP	INTRON	0	SiteClass[FBgn0266751|CR45224|INTRON|0;FBgn0051163|SKIP|INTRON|0],TranscriptAnnot[INTRON(MODIFIER||||1064|SKIP|protein_coding|CODING|FBtr0301028|4|1);INTRON(MODIFIER||||1064|SKIP|protein_coding|CODING|FBtr0305036|4|1);INTRON(MODIFIER||||1034|SKIP|protein_coding|CODING|FBtr0305037|4|1);INTRON(MODIFIER||||1027|SKIP|protein_coding|CODING|FBtr0336712|5|1);INTRON(MODIFIER||||952|SKIP|protein_coding|CO…	(TF_binding_site|mE1_TFBS_cad|FBsf0000248993)
3L_11756201_SNP	C	A	0.1897	37	158	0.0407437	0.0215339	0.979696	2.1204e-05	A	FBgn0036202	CG6024	INTRON	0					SiteClass[FBgn0036202|CG6024|INTRON|0],TranscriptAnnot[INTRON(MODIFIER||||379|CG6024|protein_coding|CODING|FBtr0332132|1|1);INTRON(MODIFIER||||379|CG6024|protein_coding|CODING|FBtr0113164|1|1)]	-
2L_21223578_SNP	G	A	0.09326	18	175	2.10506e-05	0.0229873	0.00010907	0.0323689	A	FBgn0026577	CG8677	SYNONYMOUS_CODING	0					SiteClass[FBgn0026577|CG8677|SYNONYMOUS_CODING|0],TranscriptAnnot[SYNONYMOUS_CODING(LOW|SILENT|gaA/gaG|E418|2663|CG8677|protein_coding|CODING|FBtr0346586|4|1);SYNONYMOUS_CODING(LOW|SILENT|gaA/gaG|E418|2663|CG8677|protein_coding|CODING|FBtr0331677|4|1)]	(TF_binding_site|mE1_TFBS_HSA|FBsf0000353049);(TF_binding_site|mE1_TFBS_sens|FBsf0000218585)
3L_7719626_SNP	T	G	0.1846	36	159	5.35589e-06	0.0230374	5.16658e-05	0.0152978	G	FBgn0052373	CG32373	INTRON	0	FBgn0035812	CG7457	UPSTREAM	53	SiteClass[FBgn0052373|CG32373|INTRON|0;FBgn0035812|CG7457|UPSTREAM|53],TranscriptAnnot[UPSTREAM(MODIFIER||53||1405|CG7457|protein_coding|CODING|FBtr0076814||1);INTRON(MODIFIER||||486|CG32373|protein_coding|CODING|FBtr0076806|1|1);INTRON(MODIFIER||||486|CG32373|protein_coding|CODING|FBtr0076805|1|1)]	(TF_binding_site|BDTNP1_TFBS_dl|FBsf0000306097);(TF_binding_site|mE1_TFBS_HSA|FBsf0000363055)
X_12455155_DEL	AA	A	0.3864	68	108	7.92209e-06	0.0231535	6.41882e-05	0.0188987	AA	FBgn0264542	CG43921	INTRON	0					SiteClass[FBgn0264542|CG43921|INTRON|0],TranscriptAnnot[INTRON(MODIFIER||||1768|CG43921|protein_coding|CODING|FBtr0333154|4|1)]	(TF_binding_site|mE1_TFBS_HSA|FBsf0000381835);(TF_binding_site|mE1_TFBS_inv|FBsf0000235441)
3L_7863679_SNP	T	A	0.199	39	157	0.0565719	0.0231974	0.925066	4.57719e-05	A	FBgn0052365	CG32365	INTRON	0					SiteClass[FBgn0052365|CG32365|INTRON|0],TranscriptAnnot[INTRON(MODIFIER||||628|CG32365|protein_coding|CODING|FBtr0076746|2|1);INTRON(MODIFIER||||628|CG32365|protein_coding|CODING|FBtr0339897|1|1)]	-
3L_11756174_SNP	G	A	0.1856	36	158	0.0233693	0.0233149	0.901367	8.25404e-06	A	FBgn0036202	CG6024	INTRON	0					SiteClass[FBgn0036202|CG6024|INTRON|0],TranscriptAnnot[INTRON(MODIFIER||||379|CG6024|protein_coding|CODING|FBtr0332132|1|1);INTRON(MODIFIER||||379|CG6024|protein_coding|CODING|FBtr0113164|1|1)]	-
3R_24871462_SNP	T	G	0.1134	22	172	6.55791e-06	0.0235125	5.87705e-05	0.0167791	G	FBgn0003093	Pkc98E	INTRON	0					SiteClass[FBgn0003093|Pkc98E|INTRON|0],TranscriptAnnot[INTRON(MODIFIER||||739|Pkc98E|protein_coding|CODING|FBtr0085359|9|1);INTRON(MODIFIER||||554|Pkc98E|protein_coding|CODING|FBtr0301516|8|1);INTRON(MODIFIER||||738|Pkc98E|protein_coding|CODING|FBtr0339149|9|1);INTRON(MODIFIER||||739|Pkc98E|protein_coding|CODING|FBtr0339150|9|1)]	-
3L_5887986_SNP	T	A	0.2448	47	145	3.29272e-07	0.024911	1.28346e-05	0.00286301	T	FBgn0035644	Pole2	DOWNSTREAM	805					SiteClass[FBgn0035644|Pole2|DOWNSTREAM|805],TranscriptAnnot[DOWNSTREAM(MODIFIER||805||525|Pole2|protein_coding|CODING|FBtr0077081||1);INTERGENIC(MODIFIER||||||||||1)]	(TF_binding_site|BDTNP1_TFBS_da|FBsf0000326181);(TF_binding_site|BDTNP1_TFBS_twi|FBsf0000203028);(TF_binding_site|mE1_TFBS_HSA|FBsf0000362509)
2L_4306189_SNP	A	C	0.3793	66	108	0.0300998	0.025424	0.933876	1.55323e-05	C	FBgn0010473	tutl	DOWNSTREAM	494					SiteClass[FBgn0010473|tutl|DOWNSTREAM|494],TranscriptAnnot[DOWNSTREAM(MODIFIER||494||377|tutl|protein_coding|CODING|FBtr0089268||1);INTRON(MODIFIER||||903|tutl|protein_coding|CODING|FBtr0089269|6|1);INTRON(MODIFIER||||1508|tutl|protein_coding|CODING|FBtr0089270|6|1);INTRON(MODIFIER||||902|tutl|protein_coding|CODING|FBtr0089271|6|1);INTRON(MODIFIER||||963|tutl|protein_coding|CODING|FBtr0301863|6|1…	(TF_binding_site|mE1_TFBS_chinmo|FBsf0000207158)
2R_18403571_SNP	T	G	0.4468	84	104	4.97349e-05	0.0292973	0.000218668	0.0416621	T	FBgn0003175	px	INTRON	0					SiteClass[FBgn0003175|px|INTRON|0],TranscriptAnnot[INTRON(MODIFIER||||1995|px|protein_coding|CODING|FBtr0071838|12|1);INTRON(MODIFIER||||1535|px|protein_coding|CODING|FBtr0112820|11|1);INTRON(MODIFIER||||1916|px|protein_coding|CODING|FBtr0331942|12|1)]	(TF_binding_site|BDTNP1_TFBS_da|FBsf0000325155);(TF_binding_site|BDTNP1_TFBS_dl|FBsf0000303919);(TF_binding_site|BDTNP1_TFBS_ftz|FBsf0000295236);(TF_binding_site|BDTNP1_TFBS_gt|FBsf0000293653);(TF_binding_site|BDTNP1_TFBS_hb|FBsf0000290366);(TF_binding_site|BDTNP1_TFBS_Med|FBsf0000281271);(TF_binding_site|BDTNP1_TFBS_prd|FBsf0000274621);(TF_binding_site|BDTNP1_TFBS_slp1|FBsf0000272312);(TF_bindin…
3R_18024127_SNP	A	C	0.1429	28	168	0.0148211	0.0310071	0.774794	5.86916e-06	C	FBgn0266751	CR45224	INTRON	0	FBgn0051163	SKIP	INTRON	0	SiteClass[FBgn0266751|CR45224|INTRON|0;FBgn0051163|SKIP|INTRON|0],TranscriptAnnot[INTRON(MODIFIER||||1064|SKIP|protein_coding|CODING|FBtr0301028|4|1);INTRON(MODIFIER||||1064|SKIP|protein_coding|CODING|FBtr0305036|4|1);INTRON(MODIFIER||||1034|SKIP|protein_coding|CODING|FBtr0305037|4|1);INTRON(MODIFIER||||1027|SKIP|protein_coding|CODING|FBtr0336712|5|1);INTRON(MODIFIER||||952|SKIP|protein_coding|CO…	(TF_binding_site|mE1_TFBS_cad|FBsf0000248993)
X_4105014_SNP	G	T	0.4718	92	103	0.0377798	0.033222	0.931799	3.75876e-05	G	INTERGENIC		INTERGENIC						SiteClass[|||],TranscriptAnnot[INTERGENIC(MODIFIER||||||||||1)]	(TF_binding_site|BDTNP1_TFBS_da|FBsf0000331620);(TF_binding_site|BDTNP1_TFBS_dl|FBsf0000316497);(TF_binding_site|BDTNP1_TFBS_hb|FBsf0000291771);(TF_binding_site|BDTNP1_TFBS_Med|FBsf0000287702);(TF_binding_site|BDTNP1_TFBS_prd|FBsf0000275922);(TF_binding_site|BDTNP1_TFBS_sna|FBsf0000269902);(TF_binding_site|BDTNP1_TFBS_twi|FBsf0000205053);(TF_binding_site|mE1_TFBS_HSA|FBsf0000379102)
X_8873598_SNP	T	C	0.1582	31	165	3.82688e-05	0.0335966	0.000214095	0.0318932	C	FBgn0264384	CR43836	EXON	0	FBgn0261549	rdgA	INTRON	0	SiteClass[FBgn0264384|CR43836|EXON|0;FBgn0261549|rdgA|INTRON|0],TranscriptAnnot[INTRON(MODIFIER||||1024|rdgA|protein_coding|CODING|FBtr0302662|3|1);INTRON(MODIFIER||||1027|rdgA|protein_coding|CODING|FBtr0302661|2|1);INTRON(MODIFIER||||1009|rdgA|protein_coding|CODING|FBtr0302663|3|1);INTRON(MODIFIER||||991|rdgA|protein_coding|CODING|FBtr0302664|3|1);INTRON(MODIFIER||||1457|rdgA|protein_coding|CODI…	-
3L_14295904_SNP	A	C	0.4709	89	100	1.41444e-05	0.0347051	0.000128561	0.0176144	C	FBgn0001085	fz	INTRON	0					SiteClass[FBgn0001085|fz|INTRON|0],TranscriptAnnot[INTRON(MODIFIER||||581|fz|protein_coding|CODING|FBtr0075743|1|1);INTRON(MODIFIER||||612|fz|protein_coding|CODING|FBtr0330102|1|1)]	(TF_binding_site|BDTNP1_TFBS_dl|FBsf0000307428)
3L_12420221_SNP	A	T	0.1941	33	137	1.06273e-07	0.0348986	1.03774e-05	0.000947048	T	FBgn0036285	toe	INTRON	0					SiteClass[FBgn0036285|toe|INTRON|0],TranscriptAnnot[INTRON(MODIFIER||||640|toe|protein_coding|CODING|FBtr0075980|2|1);INTRON(MODIFIER||||550|toe|protein_coding|CODING|FBtr0332087|2|1)]	(TF_binding_site|BDTNP1_TFBS_da|FBsf0000326754);(TF_binding_site|mE1_TFBS_cad|FBsf0000244838);(TF_binding_site|mE1_TFBS_HSA|FBsf0000364539)
3L_9787110_SNP	G	A	0.1407	28	171	0.0290238	0.0364119	0.865381	2.68841e-05	A	FBgn0036044	Zasp67	INTRON	0					SiteClass[FBgn0036044|Zasp67|INTRON|0],TranscriptAnnot[SPLICE_SITE_REGION(LOW||||604|Zasp67|protein_coding|CODING|FBtr0310626|2|1);SPLICE_SITE_REGION(LOW||||725|Zasp67|protein_coding|CODING|FBtr0310627|2|1);SPLICE_SITE_REGION(LOW||||730|Zasp67|protein_coding|CODING|FBtr0310629|2|1);SPLICE_SITE_REGION(LOW||||682|Zasp67|protein_coding|CODING|FBtr0344234|2|1);INTRON(MODIFIER||||604|Zasp67|protein_co…	-
2R_18720921_SNP	T	G	0.1598	27	142	3.08471e-05	0.0368292	0.000207118	0.0258978	G	FBgn0050265	CG30265	SYNONYMOUS_CODING	0					SiteClass[FBgn0050265|CG30265|SYNONYMOUS_CODING|0],TranscriptAnnot[SYNONYMOUS_CODING(LOW|SILENT|ccG/ccT|P146|485|CG30265|protein_coding|CODING|FBtr0343180|3|1);SYNONYMOUS_CODING(LOW|SILENT|ccG/ccT|P146|485|CG30265|protein_coding|CODING|FBtr0071891|3|1)]	-
2R_7566119_SNP	T	C	0.09836	18	165	2.04223e-06	0.0374373	4.99791e-05	0.00521783	C	FBgn0044020	Roc2	INTRON	0	FBgn0033644	Tret1-2	DOWNSTREAM	600	SiteClass[FBgn0044020|Roc2|INTRON|0;FBgn0033644|Tret1-2|DOWNSTREAM|600;FBgn0040491|Buffy|UPSTREAM|878],TranscriptAnnot[UPSTREAM(MODIFIER||878||299|Buffy|protein_coding|CODING|FBtr0088077||1);DOWNSTREAM(MODIFIER||600||488|Tret1-2|protein_coding|CODING|FBtr0088075||1);INTRON(MODIFIER||||113|Roc2|protein_coding|CODING|FBtr0302211|2|1);INTRON(MODIFIER||||113|Roc2|protein_coding|CODING|FBtr0088085|1|1…	(TF_binding_site|mE1_TFBS_bab1|FBsf0000214221)
2L_20025090_SNP	G	T	0.05208	10	182	0.0275697	0.0376659	0.849923	2.59439e-05	T	FBgn0032839	CG10659	UTR_3_PRIME	0					SiteClass[FBgn0032839|CG10659|UTR_3_PRIME|0],TranscriptAnnot[UTR_3_PRIME(MODIFIER||23||222|CG10659|protein_coding|CODING|FBtr0081350|1|1)]	-
3R_18024281_SNP	C	T	0.1361	26	165	0.0199562	0.0381732	0.789874	1.47368e-05	T	FBgn0266751	CR45224	INTRON	0	FBgn0051163	SKIP	INTRON	0	SiteClass[FBgn0266751|CR45224|INTRON|0;FBgn0051163|SKIP|INTRON|0],TranscriptAnnot[INTRON(MODIFIER||||1064|SKIP|protein_coding|CODING|FBtr0301028|4|1);INTRON(MODIFIER||||1064|SKIP|protein_coding|CODING|FBtr0305036|4|1);INTRON(MODIFIER||||1034|SKIP|protein_coding|CODING|FBtr0305037|4|1);INTRON(MODIFIER||||1027|SKIP|protein_coding|CODING|FBtr0336712|5|1);INTRON(MODIFIER||||952|SKIP|protein_coding|CO…	-
3L_10405258_SNP	C	A	0.07035	14	185	0.0269697	0.0384533	0.842246	2.58383e-05	A	FBgn0264722	CR43990	EXON	0	FBgn0036082	CG12362	UPSTREAM	660	SiteClass[FBgn0264722|CR43990|EXON|0;FBgn0036082|CG12362|UPSTREAM|660;FBgn0265736|CR44543|UPSTREAM|918],TranscriptAnnot[UPSTREAM(MODIFIER||918|||CR44543|ncRNA|NON_CODING|FBtr0340693||1);UPSTREAM(MODIFIER||660||511|CG12362|protein_coding|CODING|FBtr0076281||1);UPSTREAM(MODIFIER||660||511|CG12362|protein_coding|CODING|FBtr0076282||1);EXON(MODIFIER|||||CR43990|ncRNA|NON_CODING|FBtr0334101|1|1)]	(TF_binding_site|BDTNP1_TFBS_dl|FBsf0000306659)
3R_18024204_SNP	T	G	0.1399	27	166	0.0275755	0.038482	0.846194	2.69468e-05	G	FBgn0051163	SKIP	INTRON	0	FBgn0266751	CR45224	INTRON	0	SiteClass[FBgn0051163|SKIP|INTRON|0;FBgn0266751|CR45224|INTRON|0],TranscriptAnnot[INTRON(MODIFIER||||1064|SKIP|protein_coding|CODING|FBtr0301028|4|1);INTRON(MODIFIER||||1064|SKIP|protein_coding|CODING|FBtr0305036|4|1);INTRON(MODIFIER||||1034|SKIP|protein_coding|CODING|FBtr0305037|4|1);INTRON(MODIFIER||||1027|SKIP|protein_coding|CODING|FBtr0336712|5|1);INTRON(MODIFIER||||952|SKIP|protein_coding|CO…	(TF_binding_site|mE1_TFBS_cad|FBsf0000248993)
2R_17653469_SNP	C	A	0.06186	12	182	3.66508e-05	0.0413582	0.000253315	0.0255078	A	FBgn0050395	CG30395	INTRON	0	FBgn0264716	CR43984	UPSTREAM	669	SiteClass[FBgn0050395|CG30395|INTRON|0;FBgn0264716|CR43984|UPSTREAM|669],TranscriptAnnot[UPSTREAM(MODIFIER||669|||CR43984|ncRNA|NON_CODING|FBtr0334049||1);INTRON(MODIFIER||||906|CG30395|protein_coding|CODING|FBtr0300226|2|1);INTRON(MODIFIER||||686|CG30395|protein_coding|CODING|FBtr0334047|2|1);INTRON(MODIFIER||||836|CG30395|protein_coding|CODING|FBtr0334048|2|1)]	-
3L_768586_SNP	G	T	0.1061	21	177	0.024559	0.042082	0.809383	2.55607e-05	T	FBgn0052480	tRNA:CR32480	UPSTREAM	917					SiteClass[FBgn0052480|tRNA:CR32480|UPSTREAM|917],TranscriptAnnot[UPSTREAM(MODIFIER||917|||tRNA:CR32480|tRNA|NON_CODING|FBtr0072579||1);INTERGENIC(MODIFIER||||||||||1)]	(TF_binding_site|BDTNP1_TFBS_dl|FBsf0000304860);(TF_binding_site|mE1_TFBS_Trl|FBsf0000339316)
3L_3689989_SNP	T	G	0.3316	64	129	0.0319819	0.0423775	0.856685	4.18153e-05	G	FBgn0263495	CR43484	DOWNSTREAM	580					SiteClass[FBgn0263495|CR43484|DOWNSTREAM|580],TranscriptAnnot[DOWNSTREAM(MODIFIER||580|||CR43484|ncRNA|NON_CODING|FBtr0309508||1);DOWNSTREAM(MODIFIER||580|||CR43484|ncRNA|NON_CODING|FBtr0309509||1);INTERGENIC(MODIFIER||||||||||1)]	-
X_4105009_SNP	G	A	0.4694	92	104	0.0318404	0.0426122	0.854861	4.18778e-05	G	INTERGENIC		INTERGENIC						SiteClass[|||],TranscriptAnnot[INTERGENIC(MODIFIER||||||||||1)]	(TF_binding_site|BDTNP1_TFBS_da|FBsf0000331620);(TF_binding_site|BDTNP1_TFBS_dl|FBsf0000316497);(TF_binding_site|BDTNP1_TFBS_hb|FBsf0000291771);(TF_binding_site|BDTNP1_TFBS_Med|FBsf0000287702);(TF_binding_site|BDTNP1_TFBS_prd|FBsf0000275922);(TF_binding_site|BDTNP1_TFBS_sna|FBsf0000269902);(TF_binding_site|BDTNP1_TFBS_twi|FBsf0000205053);(TF_binding_site|mE1_TFBS_HSA|FBsf0000379102)
2R_17941614_SNP	T	G	0.07216	14	180	3.84369e-05	0.0428215	0.000268487	0.0253265	G	INTERGENIC		INTERGENIC						SiteClass[|||],TranscriptAnnot[INTERGENIC(MODIFIER||||||||||1)]	-
X_12794044_SNP	G	A	0.08629	17	180	3.41389e-05	0.0448121	0.00026283	0.0225892	A	FBgn0052649	CG32649	SYNONYMOUS_CODING	0					SiteClass[FBgn0052649|CG32649|SYNONYMOUS_CODING|0],TranscriptAnnot[SYNONYMOUS_CODING(LOW|SILENT|ttT/ttC|F315|661|CG32649|protein_coding|CODING|FBtr0073697|1|1)]	(TF_binding_site|mE1_TFBS_chinmo|FBsf0000208827)
2R_17896299_DEL	TT	T	0.2033	37	145	0.00499228	0.0464736	0.549823	1.8942e-06	TT	FBgn0085399	CG34370	INTRON	0					SiteClass[FBgn0085399|CG34370|INTRON|0],TranscriptAnnot[INTRON(MODIFIER||||952|CG34370|protein_coding|CODING|FBtr0299544|2|1);INTRON(MODIFIER||||952|CG34370|protein_coding|CODING|FBtr0332252|2|1)]	-
3R_18024268_SNP	A	T	0.1429	27	162	0.0115621	0.0485645	0.659886	8.78125e-06	T	FBgn0266751	CR45224	INTRON	0	FBgn0051163	SKIP	INTRON	0	SiteClass[FBgn0266751|CR45224|INTRON|0;FBgn0051163|SKIP|INTRON|0],TranscriptAnnot[INTRON(MODIFIER||||1064|SKIP|protein_coding|CODING|FBtr0301028|4|1);INTRON(MODIFIER||||1064|SKIP|protein_coding|CODING|FBtr0305036|4|1);INTRON(MODIFIER||||1034|SKIP|protein_coding|CODING|FBtr0305037|4|1);INTRON(MODIFIER||||1027|SKIP|protein_coding|CODING|FBtr0336712|5|1);INTRON(MODIFIER||||952|SKIP|protein_coding|CO…	-
X_6644141_SNP	T	C	0.05051	10	188	0.0301321	0.0489951	0.819375	4.83807e-05	C	FBgn0029898	CG14439	INTRON	0					SiteClass[FBgn0029898|CG14439|INTRON|0],TranscriptAnnot[INTRON(MODIFIER||||535|CG14439|protein_coding|CODING|FBtr0070960|1|1);INTRON(MODIFIER||||535|CG14439|protein_coding|CODING|FBtr0302356|1|1);INTRON(MODIFIER||||535|CG14439|protein_coding|CODING|FBtr0302357|2|1)]	-
X_22127134_SNP	G	T	0.2487	48	145	0.0284805	0.0491822	0.808311	4.40262e-05	G	FBgn0266348	CR44997	INTRON	0					SiteClass[FBgn0266348|CR44997|INTRON|0],TranscriptAnnot[INTRON(MODIFIER|||||CR44997|ncRNA|NON_CODING|FBtr0344073|2|1)]	-
3L_4045930_SNP	A	G	0.1082	21	173	0.0139191	0.0548481	0.667637	1.53035e-05	G	FBgn0035490	CG1136	UPSTREAM	666					SiteClass[FBgn0035490|CG1136|UPSTREAM|666],TranscriptAnnot[UPSTREAM(MODIFIER||666||458|CG1136|protein_coding|CODING|FBtr0073203||1);INTERGENIC(MODIFIER||||||||||1)]	-
3L_12420202_SNP	T	C	0.3141	60	131	8.47582e-06	0.0557293	0.000156137	0.00769962	C	FBgn0036285	toe	INTRON	0					SiteClass[FBgn0036285|toe|INTRON|0],TranscriptAnnot[INTRON(MODIFIER||||640|toe|protein_coding|CODING|FBtr0075980|2|1);INTRON(MODIFIER||||550|toe|protein_coding|CODING|FBtr0332087|2|1)]	(TF_binding_site|BDTNP1_TFBS_da|FBsf0000326754);(TF_binding_site|mE1_TFBS_cad|FBsf0000244838);(TF_binding_site|mE1_TFBS_HSA|FBsf0000364539)
3L_6859105_SNP	G	A	0.05	10	190	0.0121797	0.0559317	0.643732	1.26307e-05	A	FBgn0266590	CR45115	EXON	0					SiteClass[FBgn0266590|CR45115|EXON|0],TranscriptAnnot[EXON(MODIFIER|||||CR45115|ncRNA|NON_CODING|FBtr0344811|1|1);EXON(MODIFIER|||||CR45115|ncRNA|NON_CODING|FBtr0344812|1|1)]	(TF_binding_site|mE1_TFBS_sens|FBsf0000223277)
2L_21258149_SNP	C	T	0.09043	17	171	4.14921e-05	0.0575427	0.000369934	0.0194903	T	FBgn0261239	Hr39	UTR_3_PRIME	0					SiteClass[FBgn0261239|Hr39|UTR_3_PRIME|0],TranscriptAnnot[UTR_3_PRIME(MODIFIER||320||808|Hr39|protein_coding|CODING|FBtr0081480|8|1);UTR_3_PRIME(MODIFIER||320||808|Hr39|protein_coding|CODING|FBtr0081481|8|1);UTR_3_PRIME(MODIFIER||320||808|Hr39|protein_coding|CODING|FBtr0081479|8|1)]	(TF_binding_site|BDTNP1_TFBS_dl|FBsf0000299795);(TF_binding_site|mE1_TFBS_HSA|FBsf0000353067)
3R_25645293_SNP	T	A	0.08543	17	182	0.0112367	0.0586186	0.623641	1.20614e-05	A	FBgn0039704	neo	INTRON	0					SiteClass[FBgn0039704|neo|INTRON|0],TranscriptAnnot[INTRON(MODIFIER||||744|neo|protein_coding|CODING|FBtr0085486|1|1);INTRON(MODIFIER||||744|neo|protein_coding|CODING|FBtr0085485|1|1)]	(TF_binding_site|mE1_TFBS_hkb|FBsf0000255878);(TF_binding_site|mE1_TFBS_HSA|FBsf0000376483);(TF_binding_site|mE1_TFBS_sens|FBsf0000234148);(TF_binding_site|mE1_TFBS_Trl|FBsf0000341900)
2R_17113585_SNP	T	C	0.2961	53	126	3.47606e-05	0.0590405	0.000345297	0.0170335	C	FBgn0034606	ASPP	INTRON	0					SiteClass[FBgn0034606|ASPP|INTRON|0],TranscriptAnnot[INTRON(MODIFIER||||1020|ASPP|protein_coding|CODING|FBtr0071622|2|1);INTRON(MODIFIER||||1046|ASPP|protein_coding|CODING|FBtr0330232|2|1)]	-
3R_18024299_SNP	A	C	0.1414	27	164	0.007327	0.0601868	0.558962	6.17059e-06	C	FBgn0266751	CR45224	INTRON	0	FBgn0051163	SKIP	INTRON	0	SiteClass[FBgn0266751|CR45224|INTRON|0;FBgn0051163|SKIP|INTRON|0],TranscriptAnnot[INTRON(MODIFIER||||1064|SKIP|protein_coding|CODING|FBtr0301028|4|1);INTRON(MODIFIER||||1064|SKIP|protein_coding|CODING|FBtr0305036|4|1);INTRON(MODIFIER||||1034|SKIP|protein_coding|CODING|FBtr0305037|4|1);INTRON(MODIFIER||||1027|SKIP|protein_coding|CODING|FBtr0336712|5|1);INTRON(MODIFIER||||952|SKIP|protein_coding|CO…	-
3R_18024211_SNP	A	T	0.1538	30	165	0.00449606	0.0626189	0.490882	2.97072e-06	T	FBgn0266751	CR45224	INTRON	0	FBgn0051163	SKIP	INTRON	0	SiteClass[FBgn0266751|CR45224|INTRON|0;FBgn0051163|SKIP|INTRON|0],TranscriptAnnot[INTRON(MODIFIER||||1064|SKIP|protein_coding|CODING|FBtr0301028|4|1);INTRON(MODIFIER||||1064|SKIP|protein_coding|CODING|FBtr0305036|4|1);INTRON(MODIFIER||||1034|SKIP|protein_coding|CODING|FBtr0305037|4|1);INTRON(MODIFIER||||1027|SKIP|protein_coding|CODING|FBtr0336712|5|1);INTRON(MODIFIER||||952|SKIP|protein_coding|CO…	(TF_binding_site|mE1_TFBS_cad|FBsf0000248993)
2R_9931296_SNP	T	C	0.3403	65	126	1.84763e-05	0.0633183	0.000265719	0.0106834	C	FBgn0002643	mam	INTRON	0					SiteClass[FBgn0002643|mam|INTRON|0],TranscriptAnnot[INTRON(MODIFIER||||433|mam|protein_coding|CODING|FBtr0087598|3|1);INTRON(MODIFIER||||1594|mam|protein_coding|CODING|FBtr0087596|4|1);INTRON(MODIFIER||||1594|mam|protein_coding|CODING|FBtr0087597|3|1);INTRON(MODIFIER||||1594|mam|protein_coding|CODING|FBtr0339956|3|1)]	(TF_binding_site|BDTNP1_TFBS_dl|FBsf0000302043);(TF_binding_site|mE1_TFBS_HSA|FBsf0000356568);(TF_binding_site|mE1_TFBS_sbb|FBsf0000251269)
3R_18253152_SNP	A	G	0.4641	84	97	2.60438e-06	0.0641074	9.9092e-05	0.00307172	G	FBgn0038967	CG13847	SYNONYMOUS_CODING	0					SiteClass[FBgn0038967|CG13847|SYNONYMOUS_CODING|0],TranscriptAnnot[SYNONYMOUS_CODING(LOW|SILENT|tcC/tcT|S200|759|CG13847|protein_coding|CODING|FBtr0301711|2|1);SYNONYMOUS_CODING(LOW|SILENT|tcC/tcT|S200|758|CG13847|protein_coding|CODING|FBtr0337045|2|1)]	(TF_binding_site|mE1_TFBS_chinmo|FBsf0000213108)
2R_7471477_SNP	A	G	0.1186	23	171	4.47507e-05	0.0691556	0.000459905	0.0166288	G	FBgn0033636	tou	SYNONYMOUS_CODING	0					SiteClass[FBgn0033636|tou|SYNONYMOUS_CODING|0],TranscriptAnnot[SYNONYMOUS_CODING(LOW|SILENT|taC/taT|Y2115|3058|tou|protein_coding|CODING|FBtr0333070|12|1);SYNONYMOUS_CODING(LOW|SILENT|taC/taT|Y2188|3131|tou|protein_coding|CODING|FBtr0113066|12|1);SYNONYMOUS_CODING(LOW|SILENT|taC/taT|Y2151|3094|tou|protein_coding|CODING|FBtr0333071|11|1);SYNONYMOUS_CODING(LOW|SILENT|taC/taT|Y2188|2999|tou|protein_…	(TF_binding_site|mE1_TFBS_chinmo|FBsf0000211105);(TF_binding_site|mE1_TFBS_HSA|FBsf0000355676);(TF_binding_site|mE1_TFBS_inv|FBsf0000236505);(TF_binding_site|mE1_TFBS_sens|FBsf0000227419)
X_20281971_SNP	T	C	0.1436	28	167	4.87178e-05	0.0691608	0.000480912	0.0175183	C	FBgn0031107	HERC2	SYNONYMOUS_CODING	0					SiteClass[FBgn0031107|HERC2|SYNONYMOUS_CODING|0],TranscriptAnnot[SYNONYMOUS_CODING(LOW|SILENT|tcC/tcT|S4755|4912|HERC2|protein_coding|CODING|FBtr0301344|9|1)]	(TF_binding_site|BDTNP1_TFBS_dl|FBsf0000320560);(TF_binding_site|mE1_TFBS_cad|FBsf0000243778);(TF_binding_site|mE1_TFBS_chinmo|FBsf0000209342);(TF_binding_site|mE1_TFBS_HSA|FBsf0000349909)
2R_19110985_SNP	A	G	0.1173	23	173	4.72988e-05	0.0693787	0.000474955	0.0171416	G	INTERGENIC		INTERGENIC						SiteClass[|||],TranscriptAnnot[INTERGENIC(MODIFIER||||||||||1)]	-
2R_11423226_SNP	A	G	0.4868	92	97	2.94256e-08	0.070204	1.25467e-05	0.0001404	A	FBgn0050471	CG30471	SYNONYMOUS_CODING	0					SiteClass[FBgn0050471|CG30471|SYNONYMOUS_CODING|0],TranscriptAnnot[SYNONYMOUS_CODING(LOW|SILENT|gtA/gtG|V154|735|CG30471|protein_coding|CODING|FBtr0329954|3|1)]	(TF_binding_site|BDTNP1_TFBS_sna|FBsf0000267779);(TF_binding_site|mE1_TFBS_HSA|FBsf0000357076)
3L_14295863_SNP	A	T	0.4706	88	99	4.29404e-06	0.073805	0.000147987	0.00349144	T	FBgn0001085	fz	INTRON	0					SiteClass[FBgn0001085|fz|INTRON|0],TranscriptAnnot[INTRON(MODIFIER||||581|fz|protein_coding|CODING|FBtr0075743|1|1);INTRON(MODIFIER||||612|fz|protein_coding|CODING|FBtr0330102|1|1)]	(TF_binding_site|BDTNP1_TFBS_dl|FBsf0000307428)
2L_17256795_SNP	T	A	0.1609	28	146	0.0142691	0.0745811	0.617537	2.89354e-05	A	FBgn0032629	beat-IIIc	INTRON	0					SiteClass[FBgn0032629|beat-IIIc|INTRON|0],TranscriptAnnot[INTRON(MODIFIER||||383|beat-IIIc|protein_coding|CODING|FBtr0080971|1|1);INTRON(MODIFIER||||361|beat-IIIc|protein_coding|CODING|FBtr0080972|1|1)]	-
3L_8943574_INS	AT	A	0.4318	76	100	7.05263e-06	0.0774965	0.000199939	0.00449847	A	FBgn0264307	orb2	INTRON	0	FBgn0264305	CG43783	INTRON	0	SiteClass[FBgn0264307|orb2|INTRON|0;FBgn0264305|CG43783|INTRON|0],TranscriptAnnot[INTRON(MODIFIER||||704|orb2|protein_coding|CODING|FBtr0331513|1|1);INTRON(MODIFIER||||704|orb2|protein_coding|CODING|FBtr0331515|1|1);INTRON(MODIFIER||||1221|CG43783|protein_coding|CODING|FBtr0331518|1|1);INTRON(MODIFIER||||704|orb2|protein_coding|CODING|FBtr0331512|1|1);INTRON(MODIFIER||||704|orb2|protein_coding|CO…	-
X_4940831_SNP	C	T	0.09	18	182	4.13571e-05	0.0830139	0.000528648	0.0127532	T	FBgn0266096	CR44833	INTRON	0					SiteClass[FBgn0266096|CR44833|INTRON|0],TranscriptAnnot[INTRON(MODIFIER|||||CR44833|ncRNA|NON_CODING|FBtr0343542|1|1)]	(TF_binding_site|BDTNP1_TFBS_da|FBsf0000331708);(TF_binding_site|BDTNP1_TFBS_dl|FBsf0000316685);(TF_binding_site|BDTNP1_TFBS_gt|FBsf0000294780);(TF_binding_site|BDTNP1_TFBS_Med|FBsf0000287778);(TF_binding_site|BDTNP1_TFBS_prd|FBsf0000275937);(TF_binding_site|BDTNP1_TFBS_sna|FBsf0000269928);(TF_binding_site|BDTNP1_TFBS_twi|FBsf0000205120);(TF_binding_site|mE1_TFBS_D|FBsf0000238462);(TF_binding_sit…
3L_12420195_SNP	G	T	0.2081	41	156	8.94346e-07	0.0849144	7.98283e-05	0.0010117	T	FBgn0036285	toe	INTRON	0					SiteClass[FBgn0036285|toe|INTRON|0],TranscriptAnnot[INTRON(MODIFIER||||640|toe|protein_coding|CODING|FBtr0075980|2|1);INTRON(MODIFIER||||550|toe|protein_coding|CODING|FBtr0332087|2|1)]	(TF_binding_site|BDTNP1_TFBS_da|FBsf0000326754);(TF_binding_site|mE1_TFBS_cad|FBsf0000244838);(TF_binding_site|mE1_TFBS_HSA|FBsf0000364539)
3L_4729070_SNP	T	G	0.2423	47	147	4.47108e-05	0.0863207	0.000572304	0.0127717	G	FBgn0035574	RhoGEF64C	INTRON	0					SiteClass[FBgn0035574|RhoGEF64C|INTRON|0],TranscriptAnnot[INTRON(MODIFIER||||1984|RhoGEF64C|protein_coding|CODING|FBtr0073345|2|1);INTRON(MODIFIER||||1984|RhoGEF64C|protein_coding|CODING|FBtr0332738|2|1)]	-
3L_12420217_SNP	T	G	0.3041	59	135	9.33643e-07	0.0932086	9.07048e-05	0.000897039	G	FBgn0036285	toe	INTRON	0					SiteClass[FBgn0036285|toe|INTRON|0],TranscriptAnnot[INTRON(MODIFIER||||640|toe|protein_coding|CODING|FBtr0075980|2|1);INTRON(MODIFIER||||550|toe|protein_coding|CODING|FBtr0332087|2|1)]	(TF_binding_site|BDTNP1_TFBS_da|FBsf0000326754);(TF_binding_site|mE1_TFBS_cad|FBsf0000244838);(TF_binding_site|mE1_TFBS_HSA|FBsf0000364539)
3R_5660470_SNP	A	T	0.2418	44	138	3.13734e-05	0.0949754	0.000525878	0.00900888	T	FBgn0037766	Teh1	INTRON	0					SiteClass[FBgn0037766|Teh1|INTRON|0],TranscriptAnnot[INTRON(MODIFIER||||279|Teh1|protein_coding|CODING|FBtr0082151|2|1);INTRON(MODIFIER||||299|Teh1|protein_coding|CODING|FBtr0330082|2|1)]	-
3L_14213985_INS	CCT	G	0.05076	10	187	0.00104303	0.0951667	0.291723	7.52908e-07	G	FBgn0013718	nuf	INTRON	0					SiteClass[FBgn0013718|nuf|INTRON|0],TranscriptAnnot[UPSTREAM(MODIFIER||555||528|nuf|protein_coding|CODING|FBtr0100044||1);UPSTREAM(MODIFIER||555||541|nuf|protein_coding|CODING|FBtr0306623||1);INTRON(MODIFIER||||502|nuf|protein_coding|CODING|FBtr0100039|6|1);INTRON(MODIFIER||||502|nuf|protein_coding|CODING|FBtr0100040|6|1);INTRON(MODIFIER||||305|nuf|protein_coding|CODING|FBtr0100042|3|1);INTRON(MO…	(TF_binding_site|BDTNP1_TFBS_dl|FBsf0000307415);(TF_binding_site|mE1_TFBS_HSA|FBsf0000365128);(TF_binding_site|mE1_TFBS_Trl|FBsf0000339960)
2L_11896841_SNP	A	G	0.06061	12	186	0.0124099	0.0964081	0.551509	3.83292e-05	G	FBgn0264815	Pde1c	INTRON	0					SiteClass[FBgn0264815|Pde1c|INTRON|0],TranscriptAnnot[UPSTREAM(MODIFIER||63||952|Pde1c|protein_coding|CODING|FBtr0334135||1);UPSTREAM(MODIFIER||63||1137|Pde1c|protein_coding|CODING|FBtr0334139||1);UPSTREAM(MODIFIER||63||1158|Pde1c|protein_coding|CODING|FBtr0334141||1);INTRON(MODIFIER||||834|Pde1c|protein_coding|CODING|FBtr0334136|3|1);INTRON(MODIFIER||||834|Pde1c|protein_coding|CODING|FBtr0334140…	-
X_19647084_SNP	G	C	0.2183	43	154	0.00987246	0.0975301	0.518038	2.71509e-05	C	FBgn0031069	Pmp70	INTRON	0					SiteClass[FBgn0031069|Pmp70|INTRON|0],TranscriptAnnot[INTRON(MODIFIER||||665|Pmp70|protein_coding|CODING|FBtr0074795|2|1);INTRON(MODIFIER||||665|Pmp70|protein_coding|CODING|FBtr0335155|2|1);INTRON(MODIFIER||||665|Pmp70|protein_coding|CODING|FBtr0335157|1|1)]	(TF_binding_site|BDTNP1_TFBS_da|FBsf0000333151);(TF_binding_site|BDTNP1_TFBS_dl|FBsf0000320449);(TF_binding_site|BDTNP1_TFBS_gt|FBsf0000294973);(TF_binding_site|mE1_TFBS_sens|FBsf0000221811)
3R_18430555_SNP	T	C	0.06283	12	179	3.51059e-05	0.0985234	0.000578207	0.00923603	C	FBgn0051158	Efa6	SYNONYMOUS_CODING	0					SiteClass[FBgn0051158|Efa6|SYNONYMOUS_CODING|0],TranscriptAnnot[SYNONYMOUS_CODING(LOW|SILENT|caC/caT|H1390|1601|Efa6|protein_coding|CODING|FBtr0334559|11|1);SYNONYMOUS_CODING(LOW|SILENT|caC/caT|H1176|1387|Efa6|protein_coding|CODING|FBtr0113395|11|1);SYNONYMOUS_CODING(LOW|SILENT|caC/caT|H1310|1521|Efa6|protein_coding|CODING|FBtr0113396|10|1);SYNONYMOUS_CODING(LOW|SILENT|caC/caT|H1310|1554|Efa6|pro…	-
3R_7654761_SNP	T	C	0.1768	32	149	0.0081925	0.105681	0.480215	2.38608e-05	C	FBgn0037956	CG6959	INTRON	0					SiteClass[FBgn0037956|CG6959|INTRON|0],TranscriptAnnot[INTRON(MODIFIER||||425|CG6959|protein_coding|CODING|FBtr0082517|2|1);INTRON(MODIFIER||||425|CG6959|protein_coding|CODING|FBtr0299594|3|1)]	-
2R_9813614_SNP	T	A	0.2461	47	144	0.00618335	0.113286	0.434889	1.78105e-05	A	FBgn0013733	shot	INTRON	0					SiteClass[FBgn0013733|shot|INTRON|0],TranscriptAnnot[UPSTREAM(MODIFIER||606||5201|shot|protein_coding|CODING|FBtr0087618||1);UPSTREAM(MODIFIER||606||5501|shot|protein_coding|CODING|FBtr0087619||1);UPSTREAM(MODIFIER||606||5486|shot|protein_coding|CODING|FBtr0273225||1);UPSTREAM(MODIFIER||606||5479|shot|protein_coding|CODING|FBtr0273226||1);UPSTREAM(MODIFIER||606||5499|shot|protein_coding|CODING|FB…	(TF_binding_site|BDTNP1_TFBS_da|FBsf0000324167);(TF_binding_site|BDTNP1_TFBS_dl|FBsf0000301979);(TF_binding_site|BDTNP1_TFBS_Med|FBsf0000280261);(TF_binding_site|BDTNP1_TFBS_shn|FBsf0000273706);(TF_binding_site|BDTNP1_TFBS_sna|FBsf0000267740);(TF_binding_site|BDTNP1_TFBS_twi|FBsf0000199304);(TF_binding_site|BDTNP1_TFBS_z|FBsf0000196564);(TF_binding_site|mE1_TFBS_D|FBsf0000240643);(TF_binding_site…
3R_18253146_SNP	T	G	0.4457	82	102	1.13964e-05	0.113642	0.000383055	0.00357966	G	FBgn0038967	CG13847	SYNONYMOUS_CODING	0					SiteClass[FBgn0038967|CG13847|SYNONYMOUS_CODING|0],TranscriptAnnot[SYNONYMOUS_CODING(LOW|SILENT|tcC/tcA|S202|759|CG13847|protein_coding|CODING|FBtr0301711|2|1);SYNONYMOUS_CODING(LOW|SILENT|tcC/tcA|S202|758|CG13847|protein_coding|CODING|FBtr0337045|2|1)]	(TF_binding_site|mE1_TFBS_chinmo|FBsf0000213108)
3L_14295762_SNP	C	G	0.462	85	99	5.61013e-06	0.113832	0.000271201	0.0022059	G	FBgn0001085	fz	INTRON	0					SiteClass[FBgn0001085|fz|INTRON|0],TranscriptAnnot[INTRON(MODIFIER||||581|fz|protein_coding|CODING|FBtr0075743|1|1);INTRON(MODIFIER||||612|fz|protein_coding|CODING|FBtr0330102|1|1)]	(TF_binding_site|BDTNP1_TFBS_dl|FBsf0000307428);(TF_binding_site|mE1_TFBS_HSA|FBsf0000365155)
X_5680229_SNP	A	T	0.1071	21	175	4.24294e-05	0.1232	0.000802647	0.00772153	T	FBgn0261610	CG42699	INTRON	0					SiteClass[FBgn0261610|CG42699|INTRON|0],TranscriptAnnot[INTRON(MODIFIER||||897|CG42699|protein_coding|CODING|FBtr0302921|4|1)]	(TF_binding_site|mE1_TFBS_chinmo|FBsf0000208377)
2L_3452708_SNP	G	A	0.1685	31	153	0.00704184	0.125518	0.433223	2.72695e-05	A	FBgn0031535	CG12795	INTRON	0	FBgn0031534	Snx1	DOWNSTREAM	602	SiteClass[FBgn0031535|CG12795|INTRON|0;FBgn0031534|Snx1|DOWNSTREAM|602;FBgn0031536|Cog3|DOWNSTREAM|989],TranscriptAnnot[DOWNSTREAM(MODIFIER||602||458|Snx1|protein_coding|CODING|FBtr0077517||1);DOWNSTREAM(MODIFIER||602||456|Snx1|protein_coding|CODING|FBtr0343238||1);DOWNSTREAM(MODIFIER||989||905|Cog3|protein_coding|CODING|FBtr0077573||1);INTRON(MODIFIER||||253|CG12795|protein_coding|CODING|FBtr011…	(TF_binding_site|mE1_TFBS_cad|FBsf0000241246);(TF_binding_site|mE1_TFBS_sens|FBsf0000215800)
3L_12879529_SNP	C	A	0.09645	19	178	0.0100706	0.125898	0.476439	4.78042e-05	A	FBgn0036321	CG14120	NON_SYNONYMOUS_CODING	0					SiteClass[FBgn0036321|CG14120|NON_SYNONYMOUS_CODING|0],TranscriptAnnot[NON_SYNONYMOUS_CODING(MODERATE|MISSENSE|Act/Cct|T460P|1371|CG14120|protein_coding|CODING|FBtr0075868|1|1)]	(TF_binding_site|mE1_TFBS_sens|FBsf0000224208)
3L_14295892_SNP	T	C	0.456	83	99	4.7688e-05	0.128589	0.000890233	0.00786254	C	FBgn0001085	fz	INTRON	0					SiteClass[FBgn0001085|fz|INTRON|0],TranscriptAnnot[INTRON(MODIFIER||||581|fz|protein_coding|CODING|FBtr0075743|1|1);INTRON(MODIFIER||||612|fz|protein_coding|CODING|FBtr0330102|1|1)]	(TF_binding_site|BDTNP1_TFBS_dl|FBsf0000307428)
2R_11045154_SNP	C	G	0.05528	11	188	3.30017e-05	0.129579	0.000747013	0.00605998	G	FBgn0013467	igl	INTRON	0					SiteClass[FBgn0013467|igl|INTRON|0],TranscriptAnnot[INTRON(MODIFIER||||122|igl|protein_coding|CODING|FBtr0332267|1|1);INTRON(MODIFIER||||240|igl|protein_coding|CODING|FBtr0087361|1|1)]	-
2R_18191669_SNP	C	A	0.08122	16	181	1.89898e-06	0.131097	0.000189669	0.000822832	A	FBgn0034718	wdp	INTRON	0					SiteClass[FBgn0034718|wdp|INTRON|0],TranscriptAnnot[INTRON(MODIFIER||||677|wdp|protein_coding|CODING|FBtr0071849|2|1);INTRON(MODIFIER||||677|wdp|protein_coding|CODING|FBtr0071851|2|1);INTRON(MODIFIER||||677|wdp|protein_coding|CODING|FBtr0071852|2|1);INTRON(MODIFIER||||677|wdp|protein_coding|CODING|FBtr0071850|1|1)]	-
2R_9941354_SNP	G	T	0.08673	17	179	1.17574e-05	0.132565	0.000461033	0.00288411	T	FBgn0002643	mam	INTRON	0					SiteClass[FBgn0002643|mam|INTRON|0],TranscriptAnnot[INTRON(MODIFIER||||433|mam|protein_coding|CODING|FBtr0087598|3|1);INTRON(MODIFIER||||1594|mam|protein_coding|CODING|FBtr0087596|4|1);INTRON(MODIFIER||||1594|mam|protein_coding|CODING|FBtr0087597|3|1);INTRON(MODIFIER||||1594|mam|protein_coding|CODING|FBtr0339956|3|1)]	-
3L_2599571_SNP	C	T	0.4747	94	104	5.12276e-06	0.134773	0.000314396	0.00157486	C	FBgn0028504	CG12182	UTR_5_PRIME	0	FBgn0035355	CG16985	INTRON	0	SiteClass[FBgn0028504|CG12182|UTR_5_PRIME|0;FBgn0035355|CG16985|INTRON|0;FBgn0035356|CG16986|UPSTREAM|760],TranscriptAnnot[UTR_5_PRIME(MODIFIER||647||627|CG12182|protein_coding|CODING|FBtr0332040|1|1);UTR_5_PRIME(MODIFIER||252||694|CG12182|protein_coding|CODING|FBtr0072955|1|1);UTR_5_PRIME(MODIFIER||252||694|CG12182|protein_coding|CODING|FBtr0344989|1|1);UPSTREAM(MODIFIER||760||143|CG16986|protei…	(TF_binding_site|BDTNP1_TFBS_dl|FBsf0000305223);(TF_binding_site|BDTNP1_TFBS_Med|FBsf0000281975);(TF_binding_site|BDTNP1_TFBS_twi|FBsf0000202788);(TF_binding_site|mE1_TFBS_HSA|FBsf0000361550);(TF_binding_site|mE1_TFBS_sens|FBsf0000222676);(TF_binding_site|mE1_TFBS_Trl|FBsf0000339407);(TF_binding_site|mE1_TFBS_Ubx|FBsf0000262299)
3L_7652595_SNP	A	T	0.09278	18	176	4.92957e-05	0.135189	0.000954247	0.00748473	A	FBgn0052373	CG32373	INTRON	0	FBgn0265084	CG44195	UTR_3_PRIME	0	SiteClass[FBgn0052373|CG32373|INTRON|0;FBgn0265084|CG44195|UTR_3_PRIME|0;FBgn0261788|Ank2|INTRON|0],TranscriptAnnot[SYNONYMOUS_CODING(LOW|SILENT|acT/acA|T3382|4373|Ank2|protein_coding|CODING|FBtr0334060|18|1);SYNONYMOUS_CODING(LOW|SILENT|acT/acA|T3361|4352|Ank2|protein_coding|CODING|FBtr0303112|20|1);SYNONYMOUS_CODING(LOW|SILENT|acT/acA|T3123|4114|Ank2|protein_coding|CODING|FBtr0303121|18|1);SYNO…	(TF_binding_site|mE1_TFBS_cad|FBsf0000244427)
2R_20223052_DEL	C	CT	0.06736	13	180	0.00767972	0.137299	0.42845	3.79141e-05	CT	FBgn0265309	CR44282	EXON	0					SiteClass[FBgn0265309|CR44282|EXON|0],TranscriptAnnot[EXON(MODIFIER|||||CR44282|ncRNA|NON_CODING|FBtr0339358|1|1)]	(TF_binding_site|BDTNP1_TFBS_dl|FBsf0000304350);(TF_binding_site|mE1_TFBS_chinmo|FBsf0000212031);(TF_binding_site|mE1_TFBS_HSA|FBsf0000360160)
2R_19110988_SNP	G	A	0.1168	23	174	2.59997e-05	0.138723	0.000714711	0.00464817	A	INTERGENIC		INTERGENIC						SiteClass[|||],TranscriptAnnot[INTERGENIC(MODIFIER||||||||||1)]	-
3L_12420207_SNP	A	G	0.2953	57	136	1.46289e-06	0.14072	0.000182542	0.000602218	G	FBgn0036285	toe	INTRON	0					SiteClass[FBgn0036285|toe|INTRON|0],TranscriptAnnot[INTRON(MODIFIER||||640|toe|protein_coding|CODING|FBtr0075980|2|1);INTRON(MODIFIER||||550|toe|protein_coding|CODING|FBtr0332087|2|1)]	(TF_binding_site|BDTNP1_TFBS_da|FBsf0000326754);(TF_binding_site|mE1_TFBS_cad|FBsf0000244838);(TF_binding_site|mE1_TFBS_HSA|FBsf0000364539)
3L_21133818_SNP	C	T	0.3372	58	114	0.00559941	0.142676	0.386912	2.55332e-05	T	FBgn0024150	Ac78C	SYNONYMOUS_CODING	0					SiteClass[FBgn0024150|Ac78C|SYNONYMOUS_CODING|0],TranscriptAnnot[SYNONYMOUS_CODING(LOW|SILENT|acA/acG|T807|1718|Ac78C|protein_coding|CODING|FBtr0301701|14|1);SYNONYMOUS_CODING(LOW|SILENT|acA/acG|T311|1222|Ac78C|protein_coding|CODING|FBtr0305501|7|1);SYNONYMOUS_CODING(LOW|SILENT|acA/acG|T806|1717|Ac78C|protein_coding|CODING|FBtr0333358|14|1);SYNONYMOUS_CODING(LOW|SILENT|acA/acG|T783|1694|Ac78C|pro…	(TF_binding_site|mE1_TFBS_cad|FBsf0000245535)
3L_14295773_SNP	G	T	0.4689	83	94	2.04333e-05	0.143648	0.00065994	0.00372687	T	FBgn0001085	fz	INTRON	0					SiteClass[FBgn0001085|fz|INTRON|0],TranscriptAnnot[INTRON(MODIFIER||||581|fz|protein_coding|CODING|FBtr0075743|1|1);INTRON(MODIFIER||||612|fz|protein_coding|CODING|FBtr0330102|1|1)]	(TF_binding_site|BDTNP1_TFBS_dl|FBsf0000307428);(TF_binding_site|mE1_TFBS_HSA|FBsf0000365155)
2R_8333193_SNP	C	T	0.4277	74	99	2.35724e-05	0.143895	0.000709035	0.00410473	T	FBgn0033739	Dyb	INTRON	0					SiteClass[FBgn0033739|Dyb|INTRON|0],TranscriptAnnot[INTRON(MODIFIER||||623|Dyb|protein_coding|CODING|FBtr0087930|1|1);INTRON(MODIFIER||||655|Dyb|protein_coding|CODING|FBtr0305077|1|1);INTRON(MODIFIER||||702|Dyb|protein_coding|CODING|FBtr0308613|1|1);INTRON(MODIFIER||||614|Dyb|protein_coding|CODING|FBtr0087929|1|1);INTRON(MODIFIER||||646|Dyb|protein_coding|CODING|FBtr0100298|1|1);INTRON(MODIFIER||…	-
X_19878711_SNP	G	A	0.05556	11	187	0.00683817	0.150645	0.399846	3.90215e-05	A	INTERGENIC		INTERGENIC						SiteClass[|||],TranscriptAnnot[INTERGENIC(MODIFIER||||||||||1)]	-
X_19878686_SNP	A	T	0.05729	11	181	0.00768828	0.153071	0.410378	4.82548e-05	T	INTERGENIC		INTERGENIC						SiteClass[|||],TranscriptAnnot[INTERGENIC(MODIFIER||||||||||1)]	-
3L_12420214_SNP	T	A	0.2458	44	135	2.01589e-06	0.153871	0.000236354	0.000642319	A	FBgn0036285	toe	INTRON	0					SiteClass[FBgn0036285|toe|INTRON|0],TranscriptAnnot[INTRON(MODIFIER||||640|toe|protein_coding|CODING|FBtr0075980|2|1);INTRON(MODIFIER||||550|toe|protein_coding|CODING|FBtr0332087|2|1)]	(TF_binding_site|BDTNP1_TFBS_da|FBsf0000326754);(TF_binding_site|mE1_TFBS_cad|FBsf0000244838);(TF_binding_site|mE1_TFBS_HSA|FBsf0000364539)
2R_18726534_SNP	A	T	0.2245	44	152	2.46623e-05	0.1565	0.000795456	0.00370841	T	FBgn0034783	CG9825	INTRON	0					SiteClass[FBgn0034783|CG9825|INTRON|0],TranscriptAnnot[INTRON(MODIFIER||||485|CG9825|protein_coding|CODING|FBtr0071893|3|1)]	(TF_binding_site|mE1_TFBS_cad|FBsf0000247299)
X_17454046_SNP	T	G	0.1399	27	166	4.3632e-05	0.15772	0.00106016	0.00546318	G	FBgn0263706	CG43658	INTRON	0					SiteClass[FBgn0263706|CG43658|INTRON|0],TranscriptAnnot[INTRON(MODIFIER||||2263|CG43658|protein_coding|CODING|FBtr0310335|1|1)]	-
3L_5898035_SNP	A	T	0.08122	16	181	4.43736e-05	0.165084	0.00112366	0.00514717	T	FBgn0035647	CG10486	NON_SYNONYMOUS_CODING	0	FBgn0052413	CG32413	UPSTREAM	883	SiteClass[FBgn0035647|CG10486|NON_SYNONYMOUS_CODING|0;FBgn0052413|CG32413|UPSTREAM|883],TranscriptAnnot[NON_SYNONYMOUS_CODING(MODERATE|MISSENSE|Atg/Ttg|M522L|706|CG10486|protein_coding|CODING|FBtr0114644|4|1);UTR_3_PRIME(MODIFIER||729||327|CG10486|protein_coding|CODING|FBtr0305273|3|1);UPSTREAM(MODIFIER||883||314|CG32413|protein_coding|CODING|FBtr0305274||1)]	-
3L_5899328_SNP	T	C	0.08122	16	181	4.43736e-05	0.165084	0.00112366	0.00514717	C	FBgn0035647	CG10486	SYNONYMOUS_CODING	0					SiteClass[FBgn0035647|CG10486|SYNONYMOUS_CODING|0],TranscriptAnnot[SYNONYMOUS_CODING(LOW|SILENT|aaG/aaA|K140|327|CG10486|protein_coding|CODING|FBtr0305273|2|1);SYNONYMOUS_CODING(LOW|SILENT|aaG/aaA|K140|706|CG10486|protein_coding|CODING|FBtr0114644|2|1)]	-
2L_6543480_SNP	A	G	0.2766	52	136	0.00310894	0.192757	0.286131	2.17735e-05	G	FBgn0000320	eya	INTRON	0					SiteClass[FBgn0000320|eya|INTRON|0],TranscriptAnnot[INTRON(MODIFIER||||760|eya|protein_coding|CODING|FBtr0079334|1|1)]	(TF_binding_site|mE1_TFBS_HSA|FBsf0000346097);(TF_binding_site|mE1_TFBS_inv|FBsf0000234727);(TF_binding_site|mE1_TFBS_sens|FBsf0000216447)
2R_13550600_SNP	C	G	0.135	27	173	0.00159514	0.194623	0.234713	8.58064e-06	G	FBgn0050106	CCHa1-R	INTRON	0					SiteClass[FBgn0050106|CCHa1-R|INTRON|0],TranscriptAnnot[INTRON(MODIFIER||||499|CCHa1-R|protein_coding|CODING|FBtr0086893|1|1)]	-
2R_19111038_DEL	G	GG	0.1211	23	167	1.78389e-05	0.20671	0.000937249	0.00181718	GG	INTERGENIC		INTERGENIC						SiteClass[|||],TranscriptAnnot[INTERGENIC(MODIFIER||||||||||1)]	-
2R_17287477_SNP	A	G	0.4255	80	108	0.00397548	0.209425	0.294948	3.79605e-05	G	FBgn0010415	Sdc	INTRON	0					SiteClass[FBgn0010415|Sdc|INTRON|0],TranscriptAnnot[INTRON(MODIFIER||||399|Sdc|protein_coding|CODING|FBtr0071706|3|1);INTRON(MODIFIER||||226|Sdc|protein_coding|CODING|FBtr0071707|3|1);INTRON(MODIFIER||||398|Sdc|protein_coding|CODING|FBtr0273206|3|1);INTRON(MODIFIER||||75|Sdc|protein_coding|CODING|FBtr0305897|2|1);INTRON(MODIFIER||||266|Sdc|protein_coding|CODING|FBtr0342892|2|1);INTRON(MODIFIER|||…	-
3L_14295781_DEL	A	AT	0.4722	85	95	9.39479e-06	0.224805	0.000768651	0.000959042	AT	FBgn0001085	fz	INTRON	0					SiteClass[FBgn0001085|fz|INTRON|0],TranscriptAnnot[INTRON(MODIFIER||||581|fz|protein_coding|CODING|FBtr0075743|1|1);INTRON(MODIFIER||||612|fz|protein_coding|CODING|FBtr0330102|1|1)]	(TF_binding_site|BDTNP1_TFBS_dl|FBsf0000307428);(TF_binding_site|mE1_TFBS_HSA|FBsf0000365155)
2R_10629995_SNP	G	C	0.1071	21	175	0.00336476	0.226711	0.269565	3.64438e-05	C	FBgn0033958	CG12858	SYNONYMOUS_CODING	0					SiteClass[FBgn0033958|CG12858|SYNONYMOUS_CODING|0],TranscriptAnnot[SYNONYMOUS_CODING(LOW|SILENT|gtG/gtC|V361|762|CG12858|protein_coding|CODING|FBtr0309056|4|1);SYNONYMOUS_CODING(LOW|SILENT|gtG/gtC|V361|762|CG12858|protein_coding|CODING|FBtr0087476|4|1)]	-
X_19902955_SNP	T	C	0.2747	50	132	0.000372312	0.237033	0.136398	1.9481e-06	T	FBgn0053517	Dop2R	INTRON	0					SiteClass[FBgn0053517|Dop2R|INTRON|0],TranscriptAnnot[SYNONYMOUS_CODING(LOW|SILENT|cgA/cgG|R725|904|Dop2R|protein_coding|CODING|FBtr0343170|8|1);SYNONYMOUS_CODING(LOW|SILENT|cgA/cgG|R726|905|Dop2R|protein_coding|CODING|FBtr0343169|8|1);SYNONYMOUS_CODING(LOW|SILENT|cgA/cgG|R295|466|Dop2R|protein_coding|CODING|FBtr0070034|6|1);SYNONYMOUS_CODING(LOW|SILENT|cgA/cgG|R726|897|Dop2R|protein_coding|CODIN…	-
3L_14295770_SNP	A	C	0.456	83	99	4.95833e-05	0.248387	0.00188423	0.00276307	C	FBgn0001085	fz	INTRON	0					SiteClass[FBgn0001085|fz|INTRON|0],TranscriptAnnot[INTRON(MODIFIER||||581|fz|protein_coding|CODING|FBtr0075743|1|1);INTRON(MODIFIER||||612|fz|protein_coding|CODING|FBtr0330102|1|1)]	(TF_binding_site|BDTNP1_TFBS_dl|FBsf0000307428);(TF_binding_site|mE1_TFBS_HSA|FBsf0000365155)
3L_9299935_SNP	T	A	0.4974	96	97	0.00012877	0.256932	0.0939803	5.93491e-07	A	INTERGENIC		INTERGENIC						SiteClass[|||],TranscriptAnnot[INTERGENIC(MODIFIER||||||||||1)]	-
X_12767520_SNP	G	A	0.1117	22	175	1.43131e-05	0.26091	0.00112244	0.000974249	G	FBgn0259171	Pde9	INTRON	0					SiteClass[FBgn0259171|Pde9|INTRON|0],TranscriptAnnot[INTRON(MODIFIER||||1526|Pde9|protein_coding|CODING|FBtr0299635|2|1);INTRON(MODIFIER||||1623|Pde9|protein_coding|CODING|FBtr0330395|2|1);INTRON(MODIFIER||||1526|Pde9|protein_coding|CODING|FBtr0333525|2|1)]	-
2L_6843026_SNP	A	C	0.3867	70	111	4.44004e-05	0.272198	0.00199522	0.00212967	A	INTERGENIC		INTERGENIC						SiteClass[|||],TranscriptAnnot[INTERGENIC(MODIFIER||||||||||1)]	-
3L_13279996_INS	ATGGAAA	A	0.125	20	140	4.35616e-06	0.290484	0.000752688	0.000303854	A	FBgn0267317	CR45753	EXON	0					SiteClass[FBgn0267317|CR45753|EXON|0],TranscriptAnnot[EXON(MODIFIER|||||CR45753|ncRNA|NON_CODING|FBtr0346598|1|1)]	-
3L_5899208_SNP	T	C	0.06701	13	181	1.2201e-05	0.305823	0.00127793	0.000608183	C	FBgn0035647	CG10486	SYNONYMOUS_CODING	0					SiteClass[FBgn0035647|CG10486|SYNONYMOUS_CODING|0],TranscriptAnnot[SYNONYMOUS_CODING(LOW|SILENT|acG/acA|T180|327|CG10486|protein_coding|CODING|FBtr0305273|2|1);SYNONYMOUS_CODING(LOW|SILENT|acG/acA|T180|706|CG10486|protein_coding|CODING|FBtr0114644|2|1)]	-
X_21910588_SNP	C	T	0.1269	25	172	0.00203489	0.311516	0.192105	4.20181e-05	T	FBgn0027279	l_1_G0196	DOWNSTREAM	623					SiteClass[FBgn0027279|l_1_G0196|DOWNSTREAM|623],TranscriptAnnot[DOWNSTREAM(MODIFIER||623||1700|l_1_G0196|protein_coding|CODING|FBtr0343582||1);INTERGENIC(MODIFIER||||||||||1)]	(TF_binding_site|BDTNP1_TFBS_dl|FBsf0000320804)
2R_19939334_SNP	C	A	0.3258	58	120	0.00164181	0.313171	0.178997	3.20375e-05	C	FBgn0003353	sei	INTRON	0					SiteClass[FBgn0003353|sei|INTRON|0],TranscriptAnnot[INTRON(MODIFIER||||855|sei|protein_coding|CODING|FBtr0072169|10|1);INTRON(MODIFIER||||855|sei|protein_coding|CODING|FBtr0072170|10|1);INTRON(MODIFIER||||855|sei|protein_coding|CODING|FBtr0343342|11|1)]	-
2R_14039785_SNP	A	G	0.05025	10	189	4.88034e-05	0.316456	0.00250565	0.00168242	G	FBgn0000057	adp	SYNONYMOUS_CODING	0	FBgn0034304	CG5742	UPSTREAM	870	SiteClass[FBgn0000057|adp|SYNONYMOUS_CODING|0;FBgn0034304|CG5742|UPSTREAM|870],TranscriptAnnot[SYNONYMOUS_CODING(LOW|SILENT|acG/acA|T129|628|adp|protein_coding|CODING|FBtr0086744|1|1);SYNONYMOUS_CODING(LOW|SILENT|acG/acA|T129|628|adp|protein_coding|CODING|FBtr0340288|1|1);UPSTREAM(MODIFIER||870||543|CG5742|protein_coding|CODING|FBtr0086780||1);UPSTREAM(MODIFIER||870||543|CG5742|protein_coding|COD…	(TF_binding_site|BDTNP1_TFBS_dl|FBsf0000302954);(TF_binding_site|mE1_TFBS_cad|FBsf0000246923);(TF_binding_site|mE1_TFBS_HSA|FBsf0000357975);(TF_binding_site|mE1_TFBS_HSA|FBsf0000357976);(TF_binding_site|mE1_TFBS_sens|FBsf0000228700)
3L_10866691_SNP	A	T	0.4197	81	112	0.0010068	0.320583	0.151154	1.79251e-05	A	FBgn0026160	tna	INTRON	0					SiteClass[FBgn0026160|tna|INTRON|0],TranscriptAnnot[INTRON(MODIFIER||||1135|tna|protein_coding|CODING|FBtr0076267|8|1);INTRON(MODIFIER||||1149|tna|protein_coding|CODING|FBtr0076268|7|1);INTRON(MODIFIER||||1109|tna|protein_coding|CODING|FBtr0301658|8|1)]	(TF_binding_site|mE1_TFBS_cad|FBsf0000244695);(TF_binding_site|mE1_TFBS_chinmo|FBsf0000210064)
2R_19939336_INS	T	TAA	0.3446	61	116	0.00142964	0.327064	0.166475	3.01458e-05	T	FBgn0003353	sei	INTRON	0					SiteClass[FBgn0003353|sei|INTRON|0],TranscriptAnnot[INTRON(MODIFIER||||855|sei|protein_coding|CODING|FBtr0072169|10|1);INTRON(MODIFIER||||855|sei|protein_coding|CODING|FBtr0072170|10|1);INTRON(MODIFIER||||855|sei|protein_coding|CODING|FBtr0343342|11|1)]	-
X_21910584_INS	TT	T	0.1313	26	172	0.00109443	0.356835	0.143838	2.73638e-05	T	FBgn0027279	l_1_G0196	DOWNSTREAM	620					SiteClass[FBgn0027279|l_1_G0196|DOWNSTREAM|620],TranscriptAnnot[DOWNSTREAM(MODIFIER||620||1700|l_1_G0196|protein_coding|CODING|FBtr0343582||1);INTERGENIC(MODIFIER||||||||||1)]	(TF_binding_site|BDTNP1_TFBS_dl|FBsf0000320804)
2R_10410795_SNP	T	G	0.1231	24	171	0.000837814	0.373852	0.127522	2.22906e-05	G	INTERGENIC		INTERGENIC						SiteClass[|||],TranscriptAnnot[INTERGENIC(MODIFIER||||||||||1)]	-
2R_11417974_SNP	A	T	0.4583	88	104	0.000172526	0.381382	0.0755818	3.1749e-06	A	FBgn0019968	Khc-73	INTRON	0					SiteClass[FBgn0019968|Khc-73|INTRON|0],TranscriptAnnot[INTRON(MODIFIER||||1921|Khc-73|protein_coding|CODING|FBtr0087357|2|1);INTRON(MODIFIER||||1899|Khc-73|protein_coding|CODING|FBtr0329955|2|1);INTRON(MODIFIER||||1957|Khc-73|protein_coding|CODING|FBtr0329957|2|1);INTRON(MODIFIER||||1913|Khc-73|protein_coding|CODING|FBtr0346265|2|1);INTRON(MODIFIER||||1908|Khc-73|protein_coding|CODING|FBtr0329956…	(TF_binding_site|BDTNP1_TFBS_da|FBsf0000324337);(TF_binding_site|BDTNP1_TFBS_dl|FBsf0000302352);(TF_binding_site|BDTNP1_TFBS_gt|FBsf0000293525);(TF_binding_site|BDTNP1_TFBS_hb|FBsf0000290207);(TF_binding_site|BDTNP1_TFBS_Med|FBsf0000280452);(TF_binding_site|BDTNP1_TFBS_sna|FBsf0000267778);(TF_binding_site|BDTNP1_TFBS_twi|FBsf0000199470);(TF_binding_site|mE1_TFBS_cad|FBsf0000246732);(TF_binding_si…
2L_8472966_SNP	T	C	0.3085	58	130	0.00120091	0.416091	0.131941	4.8805e-05	C	FBgn0262029	d	INTRON	0					SiteClass[FBgn0262029|d|INTRON|0],TranscriptAnnot[INTRON(MODIFIER||||1426|d|protein_coding|CODING|FBtr0303924|1|1)]	-
2R_18550922_SNP	C	A	0.08629	17	180	0.000910805	0.438055	0.115521	4.04116e-05	C	FBgn0260768	CG42566	DOWNSTREAM	176	FBgn0034761	CG4250	UPSTREAM	275	SiteClass[FBgn0260768|CG42566|DOWNSTREAM|176;FBgn0034761|CG4250|UPSTREAM|275],TranscriptAnnot[UPSTREAM(MODIFIER||275||121|CG4250|protein_coding|CODING|FBtr0071865||1);UPSTREAM(MODIFIER||275||134|CG4250|protein_coding|CODING|FBtr0309802||1);DOWNSTREAM(MODIFIER||176||76|CG42566|protein_coding|CODING|FBtr0301270||1|WARNING_TRANSCRIPT_INCOMPLETE);DOWNSTREAM(MODIFIER||176||76|CG42566|protein_coding|CO…	-
2L_16228532_INS	ATTTATAAATCTTTTCAGATGAGTACGTTTAGTTTGGTAATTTGAAT	A	0.05882	11	176	2.93467e-06	0.442496	0.00115111	7.12375e-05	A	INTERGENIC		INTERGENIC						SiteClass[|||],TranscriptAnnot[INTERGENIC(MODIFIER||||||||||1)]	-
3L_2571858_INS	T	TT	0.2447	46	142	0.000153417	0.445002	0.0633459	4.67842e-06	T	FBgn0010909	msn	INTRON	0					SiteClass[FBgn0010909|msn|INTRON|0],TranscriptAnnot[INTRON(MODIFIER||||1504|msn|protein_coding|CODING|FBtr0072956|3|1);INTRON(MODIFIER||||1200|msn|protein_coding|CODING|FBtr0072957|3|1);INTRON(MODIFIER||||1102|msn|protein_coding|CODING|FBtr0072958|3|1);INTRON(MODIFIER||||1102|msn|protein_coding|CODING|FBtr0072959|3|1);INTRON(MODIFIER||||1404|msn|protein_coding|CODING|FBtr0333362|3|1);INTRON(MODIF…	-
X_18519412_SNP	G	A	0.3618	72	127	0.000714424	0.501057	0.0946829	4.61674e-05	A	FBgn0030941	wgn	INTRON	0					SiteClass[FBgn0030941|wgn|INTRON|0],TranscriptAnnot[INTRON(MODIFIER||||343|wgn|protein_coding|CODING|FBtr0074617|4|1);INTRON(MODIFIER||||267|wgn|protein_coding|CODING|FBtr0342843|5|1)]	(TF_binding_site|BDTNP1_TFBS_da|FBsf0000332974);(TF_binding_site|BDTNP1_TFBS_twi|FBsf0000263650)
X_19647018_SNP	C	T	0.3655	72	125	0.000603222	0.537007	0.0836924	4.75027e-05	T	FBgn0031069	Pmp70	INTRON	0					SiteClass[FBgn0031069|Pmp70|INTRON|0],TranscriptAnnot[INTRON(MODIFIER||||665|Pmp70|protein_coding|CODING|FBtr0074795|2|1);INTRON(MODIFIER||||665|Pmp70|protein_coding|CODING|FBtr0335155|2|1);INTRON(MODIFIER||||665|Pmp70|protein_coding|CODING|FBtr0335157|1|1)]	(TF_binding_site|BDTNP1_TFBS_da|FBsf0000333151);(TF_binding_site|BDTNP1_TFBS_dl|FBsf0000320449);(TF_binding_site|BDTNP1_TFBS_gt|FBsf0000294973);(TF_binding_site|mE1_TFBS_sens|FBsf0000221811)
3L_10309320_SNP	T	G	0.399	77	116	0.000387114	0.552337	0.0698817	3.08603e-05	G	INTERGENIC		INTERGENIC						SiteClass[|||],TranscriptAnnot[INTERGENIC(MODIFIER||||||||||1)]	(TF_binding_site|BDTNP1_TFBS_da|FBsf0000326552);(TF_binding_site|BDTNP1_TFBS_dl|FBsf0000306633);(TF_binding_site|mE1_TFBS_HSA|FBsf0000363885)
X_11794702_SNP	C	G	0.1256	25	174	3.08927e-05	0.567069	0.00452256	0.000255029	G	FBgn0030354	Upf1	UTR_3_PRIME	0	FBgn0260780	wisp	DOWNSTREAM	749	SiteClass[FBgn0030354|Upf1|UTR_3_PRIME|0;FBgn0260780|wisp|DOWNSTREAM|749],TranscriptAnnot[UTR_3_PRIME(MODIFIER||569||1180|Upf1|protein_coding|CODING|FBtr0073596|4|1);UTR_3_PRIME(MODIFIER||569||1180|Upf1|protein_coding|CODING|FBtr0342744|4|1);DOWNSTREAM(MODIFIER||749||1373|wisp|protein_coding|CODING|FBtr0073573||1);DOWNSTREAM(MODIFIER||749||1372|wisp|protein_coding|CODING|FBtr0342742||1);DOWNSTREA…	(TF_binding_site|mE1_TFBS_HSA|FBsf0000381684)
X_18524862_SNP	T	C	0.48	96	104	0.000286995	0.568089	0.0612235	2.39585e-05	T	FBgn0030941	wgn	INTRON	0					SiteClass[FBgn0030941|wgn|INTRON|0],TranscriptAnnot[INTRON(MODIFIER||||343|wgn|protein_coding|CODING|FBtr0074617|1|1);INTRON(MODIFIER||||267|wgn|protein_coding|CODING|FBtr0342843|1|1)]	(TF_binding_site|mE1_TFBS_chinmo|FBsf0000209163)
3R_18253174_SNP	T	C	0.3105	59	131	4.44452e-05	0.571823	0.00534046	0.000342927	C	FBgn0038967	CG13847	NON_SYNONYMOUS_CODING	0					SiteClass[FBgn0038967|CG13847|NON_SYNONYMOUS_CODING|0],TranscriptAnnot[NON_SYNONYMOUS_CODING(MODERATE|MISSENSE|cGg/cAg|R193Q|759|CG13847|protein_coding|CODING|FBtr0301711|2|1);NON_SYNONYMOUS_CODING(MODERATE|MISSENSE|cGg/cAg|R193Q|758|CG13847|protein_coding|CODING|FBtr0337045|2|1)]	(TF_binding_site|mE1_TFBS_chinmo|FBsf0000213108)
2L_16374911_SNP	A	G	0.1667	29	145	2.67045e-05	0.602824	0.00466993	0.000183687	G	INTERGENIC		INTERGENIC						SiteClass[|||],TranscriptAnnot[INTERGENIC(MODIFIER||||||||||1)]	-
2R_17845543_SNP	T	C	0.09548	19	180	0.000324168	0.609135	0.059192	3.57252e-05	C	INTERGENIC		INTERGENIC						SiteClass[|||],TranscriptAnnot[INTERGENIC(MODIFIER||||||||||1)]	-
2L_20877879_SNP	T	A	0.4254	77	104	0.000362322	0.634837	0.0587473	4.74008e-05	A	FBgn0032901	sky	INTRON	0	FBgn0263996	CG43739	INTRON	0	SiteClass[FBgn0032901|sky|INTRON|0;FBgn0263996|CG43739|INTRON|0],TranscriptAnnot[INTRON(MODIFIER||||568|sky|protein_coding|CODING|FBtr0081440|5|1);INTRON(MODIFIER||||587|sky|protein_coding|CODING|FBtr0081441|5|1);INTRON(MODIFIER||||587|sky|protein_coding|CODING|FBtr0081442|4|1);INTRON(MODIFIER||||568|sky|protein_coding|CODING|FBtr0081443|4|1);INTRON(MODIFIER||||592|sky|protein_coding|CODING|FBtr0…	(TF_binding_site|mE1_TFBS_cnc|FBsf0000206294)
3L_12078311_SNP	C	T	0.1399	27	166	2.54459e-05	0.69543	0.00575032	0.000106028	T	INTERGENIC		INTERGENIC						SiteClass[|||],TranscriptAnnot[INTERGENIC(MODIFIER||||||||||1)]	(TF_binding_site|mE1_TFBS_kn|FBsf0000336492)
3L_10906520_SNP	T	C	0.25	49	147	4.72724e-05	0.698837	0.00746578	0.000185051	C	INTERGENIC		INTERGENIC						SiteClass[|||],TranscriptAnnot[INTERGENIC(MODIFIER||||||||||1)]	-
2R_11418492_SNP	C	T	0.4216	78	107	6.29129e-05	0.830735	0.0217848	2.06999e-05	T	FBgn0019968	Khc-73	INTRON	0					SiteClass[FBgn0019968|Khc-73|INTRON|0],TranscriptAnnot[INTRON(MODIFIER||||1921|Khc-73|protein_coding|CODING|FBtr0087357|2|1);INTRON(MODIFIER||||1899|Khc-73|protein_coding|CODING|FBtr0329955|2|1);INTRON(MODIFIER||||1957|Khc-73|protein_coding|CODING|FBtr0329957|2|1);INTRON(MODIFIER||||1913|Khc-73|protein_coding|CODING|FBtr0346265|2|1);INTRON(MODIFIER||||1908|Khc-73|protein_coding|CODING|FBtr0329956…	(TF_binding_site|BDTNP1_TFBS_dl|FBsf0000302353);(TF_binding_site|BDTNP1_TFBS_hb|FBsf0000290208);(TF_binding_site|BDTNP1_TFBS_twi|FBsf0000199471);(TF_binding_site|mE1_TFBS_cad|FBsf0000246732)
2L_6786346_SNP	T	G	0.1005	19	170	4.64169e-05	0.882545	0.0176234	2.00004e-05	G	FBgn0015776	nrv1	SYNONYMOUS_CODING	0					SiteClass[FBgn0015776|nrv1|SYNONYMOUS_CODING|0],TranscriptAnnot[SYNONYMOUS_CODING(LOW|SILENT|acC/acA|T23|309|nrv1|protein_coding|CODING|FBtr0079384|1|1);SYNONYMOUS_CODING(LOW|SILENT|acC/acA|T23|309|nrv1|protein_coding|CODING|FBtr0332370|1|1)]	(TF_binding_site|BDTNP1_TFBS_dl|FBsf0000297113);(TF_binding_site|mE1_TFBS_Trl|FBsf0000337294)

## Sheet: network
FBgn0010382	FBgn0010382	CycE	list	42
FBgn0002643	FBgn0002643	mam	list	18
FBgn0003371	FBgn0003371	sgg	list	18
FBgn0001085	FBgn0001085	fz	list	16
FBgn0010909	FBgn0010909	msn	list	11
FBgn0004647	FBgn0004647	N	missing	10
FBgn0000320	FBgn0000320	eya	list	9
FBgn0002576	FBgn0002576	lz	list	9
FBgn0003175	FBgn0003175	px	list	9
FBgn0026160	FBgn0026160	tna	list	8
FBgn0001169	FBgn0001169	H	missing	7
FBgn0022238	FBgn0022238	lolal	list	7
FBgn0003041	FBgn0003041	pbl	missing	7
FBgn0086680	FBgn0086680	vvl	list	7
FBgn0000635	FBgn0000635	Fas2	list	6
FBgn0003205	FBgn0003205	Ras85D	missing	6
FBgn0003731	FBgn0003731	Egfr	missing	5
FBgn0000928	FBgn0000928	fs(1)Yb	list	5
FBgn0016797	FBgn0016797	fz2	list	5
FBgn0013718	FBgn0013718	nuf	list	5
FBgn0014020	FBgn0014020	Rho1	missing	5
FBgn0033636	FBgn0033636	tou	list	5
FBgn0004009	FBgn0004009	wg	missing	5
FBgn0000117	FBgn0000117	arm	missing	4
FBgn0005592	FBgn0005592	btl	missing	4
FBgn0000463	FBgn0000463	Dl	missing	4
FBgn0000490	FBgn0000490	dpp	missing	4
FBgn0000499	FBgn0000499	dsh	missing	4
FBgn0000606	FBgn0000606	eve	list	4
FBgn0002783	FBgn0002783	mor	missing	4
FBgn0261885	FBgn0261885	osa	missing	4
FBgn0003042	FBgn0003042	Pc	missing	4
FBgn0003117	FBgn0003117	pnr	missing	4
FBgn0004635	FBgn0004635	rho	missing	4
FBgn0023172	FBgn0023172	RhoGEF2	list	4
FBgn0013733	FBgn0013733	shot	list	4
FBgn0260642	FBgn0260642	Antp	missing	3
FBgn0000097	FBgn0000097	aop	missing	3
FBgn0000212	FBgn0000212	brm	missing	3
FBgn0004198	FBgn0004198	ct	missing	3
FBgn0001075	FBgn0001075	ft	missing	3
FBgn0002121	FBgn0002121	l(2)gl	missing	3
FBgn0011648	FBgn0011648	Mad	missing	3
FBgn0004657	FBgn0004657	mys	missing	3
FBgn0011817	FBgn0011817	nmo	missing	3
FBgn0003053	FBgn0003053	peb	missing	3
FBgn0264895	FBgn0264895	RapGAP1	list	3
FBgn0035574	FBgn0035574	RhoGEF64C	list	3
FBgn0005631	FBgn0005631	robo	missing	3
FBgn0003716	FBgn0003716	tkv	missing	3
FBgn0036285	FBgn0036285	toe	list	3
FBgn0002069	FBgn0002069	Aats-asp	list	2
FBgn0026597	FBgn0026597	Axn	missing	2
FBgn0014459	FBgn0014459	BacA\p35	missing	2
FBgn0013433	FBgn0013433	beat-Ia	missing	2
FBgn0015907	FBgn0015907	bl	list	2
FBgn0000229	FBgn0000229	bsk	missing	2
FBgn0027053	FBgn0027053	CSN5	missing	2
FBgn0262029	FBgn0262029	d	list	2
FBgn0005677	FBgn0005677	dac	missing	2
FBgn0011763	FBgn0011763	Dp	missing	2
FBgn0000497	FBgn0000497	ds	missing	2
FBgn0260003	FBgn0260003	Dys	list	2
FBgn0011766	FBgn0011766	E2f	missing	2
FBgn0033483	FBgn0033483	egr	missing	2
FBgn0004875	FBgn0004875	enc	missing	2
FBgn0000625	FBgn0000625	eyg	missing	2
FBgn0011591	FBgn0011591	fng	missing	2
FBgn0004644	FBgn0004644	hh	missing	2
FBgn0001233	FBgn0001233	Hsp83	missing	2
FBgn0001291	FBgn0001291	Jra	missing	2
FBgn0001332	FBgn0001332	L	missing	2
FBgn0015509	FBgn0015509	lin19	list	2
FBgn0002781	FBgn0002781	mod(mdg4)	missing	2
FBgn0261617	FBgn0261617	nej	missing	2
FBgn0053554	FBgn0053554	Nipped-A	missing	2
FBgn0002945	FBgn0002945	nkd	missing	2
FBgn0003079	FBgn0003079	phl	missing	2
FBgn0004861	FBgn0004861	ph-p	missing	2
FBgn0030057	FBgn0030057	Ppt1	missing	2
FBgn0003892	FBgn0003892	ptc	missing	2
FBgn0010333	FBgn0010333	Rac1	missing	2
FBgn0011829	FBgn0011829	Ret	missing	2
FBgn0003256	FBgn0003256	rl	missing	2
FBgn0026181	FBgn0026181	rok	missing	2
FBgn0003276	FBgn0003276	RpII140	missing	2
FBgn0011706	FBgn0011706	rpr	missing	2
FBgn0003339	FBgn0003339	Scr	missing	2
FBgn0263289	FBgn0263289	scrib	missing	2
FBgn0010415	FBgn0010415	Sdc	list	2
FBgn0003391	FBgn0003391	shg	missing	2
FBgn0003415	FBgn0003415	skd	missing	2
FBgn0264089	FBgn0264089	sli	missing	2
FBgn0011715	FBgn0011715	Snr1	missing	2
FBgn0014388	FBgn0014388	sty	missing	2
FBgn0003567	FBgn0003567	su(Hw)	missing	2
FBgn0005561	FBgn0005561	sv	missing	2
FBgn0003751	FBgn0003751	trk	list	2
FBgn0013263	FBgn0013263	Trl	missing	2
FBgn0001402	FBgn0001402	trol	missing	2
FBgn0010473	FBgn0010473	tutl	list	2
FBgn0003997	FBgn0003997	W	missing	2
FBgn0265434	FBgn0265434	zip	missing	2
FBgn0005775	FBgn0005775	Con	list	1
FBgn0025641	FBgn0025641	DAAM	list	1
FBgn0261239	FBgn0261239	Hr39	list	1
FBgn0017590	FBgn0017590	klg	list	1
FBgn0259749	FBgn0259749	mmy	list	1
FBgn0015776	FBgn0015776	nrv1	list	1
FBgn0034789	FBgn0034789	PIP5K59B	list	1
FBgn0011260	FBgn0011260	Sema-2a	list	1
FBgn0250876	FBgn0250876	Sema-5c	list	1
FBgn0266521	FBgn0266521	stai	list	1
FBgn0266579	FBgn0266579	tau	list	1
FBgn0030941	FBgn0030941	wgn	list	1

## Sheet: GO Viability network
Annotation Cluster 1	Enrichment Score: 41.30144262478599
Category	Term	Count	%	PValue	Genes	List Total	Pop Hits	Pop Total	Fold Enrichment	Bonferroni	Benjamini	FDR
GOTERM_BP_4	GO:0009887~organ morphogenesis	79	71.1712	6.177e-55	FBGN0026597, FBGN0250876, FBGN0003716, FBGN0262029, FBGN0001075, FBGN0001233, FBGN0261239, FBGN0003339, FBGN0004009, FBGN0260003, FBGN0263289, FBGN0261617, FBGN0010382, FBGN0027053, FBGN0003371, FBGN0014020, FBGN0017590, FBGN0261885, FBGN0013718, FBGN0005592, FBGN0003175, FBGN0004657, FBGN0266579, FBGN0011766, FBGN0010333, FBGN0003997, FBGN0000625, FBGN0010473, FBGN0014388, FBGN0023172, FBGN00038…	111	996	10386	7.42152	6.62174e-52	6.62174e-52	9.84594e-52
GOTERM_BP_4	GO:0048513~animal organ development	88	79.2793	1.26174e-51	FBGN0026597, FBGN0250876, FBGN0003716, FBGN0262029, FBGN0025641, FBGN0001075, FBGN0001233, FBGN0261239, FBGN0003339, FBGN0004009, FBGN0260003, FBGN0263289, FBGN0261617, FBGN0010382, FBGN0053554, FBGN0027053, FBGN0003371, FBGN0014020, FBGN0017590, FBGN0261885, FBGN0013718, FBGN0005592, FBGN0003175, FBGN0004657, FBGN0266579, FBGN0011766, FBGN0010333, FBGN0003997, FBGN0011260, FBGN0000625, FBGN00104…	111	1548	10386	5.31909	1.35258e-48	6.76292e-49	2.01117e-48
GOTERM_BP_4	GO:0048729~tissue morphogenesis	68	61.2613	2.55793e-49	FBGN0026597, FBGN0003716, FBGN0262029, FBGN0001075, FBGN0004861, FBGN0004009, FBGN0260003, FBGN0263289, FBGN0261617, FBGN0010382, FBGN0027053, FBGN0014020, FBGN0261885, FBGN0013718, FBGN0005592, FBGN0003175, FBGN0004657, FBGN0011766, FBGN0010333, FBGN0003997, FBGN0011763, FBGN0014388, FBGN0259749, FBGN0023172, FBGN0003892, FBGN0001169, FBGN0265434, FBGN0003415, FBGN0002783, FBGN0000490, FBGN00001…	111	738	10386	8.6214	2.7421e-46	9.14032e-47	4.07725e-46
GOTERM_BP_4	GO:0035295~tube development	71	63.964	6.23121e-49	FBGN0026597, FBGN0003716, FBGN0262029, FBGN0001075, FBGN0003339, FBGN0004009, FBGN0260003, FBGN0263289, FBGN0010382, FBGN0053554, FBGN0003371, FBGN0014020, FBGN0013718, FBGN0261885, FBGN0005592, FBGN0003175, FBGN0004657, FBGN0011766, FBGN0010333, FBGN0003997, FBGN0000625, FBGN0260642, FBGN0014388, FBGN0259749, FBGN0023172, FBGN0003892, FBGN0001169, FBGN0265434, FBGN0003415, FBGN0002783, FBGN00004…	111	856	10386	7.76086	6.67985e-46	1.66996e-46	9.93235e-46
GOTERM_BP_4	GO:0002009~morphogenesis of an epithelium	67	60.3604	1.2014e-48	FBGN0026597, FBGN0003716, FBGN0262029, FBGN0001075, FBGN0004861, FBGN0004009, FBGN0260003, FBGN0263289, FBGN0261617, FBGN0010382, FBGN0027053, FBGN0014020, FBGN0261885, FBGN0013718, FBGN0005592, FBGN0003175, FBGN0004657, FBGN0011766, FBGN0010333, FBGN0003997, FBGN0011763, FBGN0014388, FBGN0259749, FBGN0023172, FBGN0003892, FBGN0001169, FBGN0265434, FBGN0003415, FBGN0002783, FBGN0000490, FBGN00001…	111	721	10386	8.69491	1.2879e-45	2.1465e-46	1.915e-45
GOTERM_BP_4	GO:0060562~epithelial tube morphogenesis	60	54.0541	6.97657e-45	FBGN0026597, FBGN0003716, FBGN0262029, FBGN0001075, FBGN0004009, FBGN0260003, FBGN0263289, FBGN0010382, FBGN0014020, FBGN0013718, FBGN0261885, FBGN0005592, FBGN0003175, FBGN0004657, FBGN0011766, FBGN0010333, FBGN0003997, FBGN0014388, FBGN0259749, FBGN0023172, FBGN0003892, FBGN0001169, FBGN0265434, FBGN0003415, FBGN0002783, FBGN0000490, FBGN0000117, FBGN0004647, FBGN0003041, FBGN0011817, FBGN00004…	111	587	10386	9.56398	7.47888e-42	1.06841e-42	1.11204e-41
GOTERM_BP_4	GO:0035239~tube morphogenesis	61	54.955	8.57371e-45	FBGN0026597, FBGN0003716, FBGN0262029, FBGN0001075, FBGN0004009, FBGN0260003, FBGN0263289, FBGN0010382, FBGN0014020, FBGN0013718, FBGN0261885, FBGN0005592, FBGN0003175, FBGN0004657, FBGN0011766, FBGN0010333, FBGN0003997, FBGN0014388, FBGN0259749, FBGN0023172, FBGN0003892, FBGN0001169, FBGN0265434, FBGN0003415, FBGN0002783, FBGN0000490, FBGN0000117, FBGN0004647, FBGN0003041, FBGN0011817, FBGN00004…	111	620	10386	9.20584	9.19102e-42	1.14888e-42	1.36662e-41
GOTERM_BP_4	GO:0060429~epithelium development	75	67.5676	1.97253e-44	FBGN0026597, FBGN0000928, FBGN0003716, FBGN0262029, FBGN0001075, FBGN0004861, FBGN0004009, FBGN0260003, FBGN0263289, FBGN0261617, FBGN0010382, FBGN0053554, FBGN0027053, FBGN0003371, FBGN0014020, FBGN0261885, FBGN0013718, FBGN0005592, FBGN0003175, FBGN0004657, FBGN0011766, FBGN0010333, FBGN0003997, FBGN0000625, FBGN0011763, FBGN0014388, FBGN0259749, FBGN0023172, FBGN0003892, FBGN0001169, FBGN02654…	111	1171	10386	5.9928	2.11455e-41	2.3495e-42	3.14415e-41
GOTERM_BP_4	GO:0048569~post-embryonic organ development	58	52.2523	3.56019e-42	FBGN0026597, FBGN0003716, FBGN0262029, FBGN0001075, FBGN0004009, FBGN0260003, FBGN0263289, FBGN0010382, FBGN0027053, FBGN0014020, FBGN0013718, FBGN0261885, FBGN0003175, FBGN0004657, FBGN0011766, FBGN0010333, FBGN0003997, FBGN0023172, FBGN0003892, FBGN0001169, FBGN0265434, FBGN0002783, FBGN0003415, FBGN0000490, FBGN0000117, FBGN0004647, FBGN0011817, FBGN0000497, FBGN0004644, FBGN0000499, FBGN00006…	111	589	10386	9.21378	3.81652e-39	3.18044e-40	5.67483e-39
GOTERM_BP_4	GO:0007560~imaginal disc morphogenesis	55	49.5495	4.26523e-42	FBGN0026597, FBGN0003716, FBGN0262029, FBGN0001075, FBGN0004009, FBGN0260003, FBGN0263289, FBGN0010382, FBGN0014020, FBGN0013718, FBGN0261885, FBGN0003175, FBGN0004657, FBGN0011766, FBGN0010333, FBGN0003997, FBGN0023172, FBGN0003892, FBGN0001169, FBGN0265434, FBGN0002783, FBGN0003415, FBGN0000490, FBGN0000117, FBGN0004647, FBGN0011817, FBGN0000497, FBGN0004644, FBGN0000499, FBGN0000635, FBGN00117…	111	502	10386	10.2514	4.57233e-39	3.51718e-40	6.79865e-39
GOTERM_BP_4	GO:0048563~post-embryonic organ morphogenesis	55	49.5495	4.26523e-42	FBGN0026597, FBGN0003716, FBGN0262029, FBGN0001075, FBGN0004009, FBGN0260003, FBGN0263289, FBGN0010382, FBGN0014020, FBGN0013718, FBGN0261885, FBGN0003175, FBGN0004657, FBGN0011766, FBGN0010333, FBGN0003997, FBGN0023172, FBGN0003892, FBGN0001169, FBGN0265434, FBGN0002783, FBGN0003415, FBGN0000490, FBGN0000117, FBGN0004647, FBGN0011817, FBGN0000497, FBGN0004644, FBGN0000499, FBGN0000635, FBGN00117…	111	502	10386	10.2514	4.57233e-39	3.51718e-40	6.79865e-39
GOTERM_BP_4	GO:0007444~imaginal disc development	61	54.955	1.38204e-41	FBGN0026597, FBGN0003716, FBGN0262029, FBGN0001075, FBGN0004009, FBGN0260003, FBGN0263289, FBGN0010382, FBGN0053554, FBGN0003371, FBGN0014020, FBGN0013718, FBGN0261885, FBGN0005592, FBGN0003175, FBGN0004657, FBGN0011766, FBGN0010333, FBGN0003997, FBGN0000625, FBGN0023172, FBGN0003892, FBGN0001169, FBGN0265434, FBGN0003415, FBGN0002783, FBGN0000490, FBGN0000117, FBGN0004647, FBGN0011817, FBGN00004…	111	702	10386	8.13052	1.48155e-38	9.87701e-40	2.20294e-38
GOTERM_BP_4	GO:0035114~imaginal disc-derived appendage morphogenesis	51	45.9459	1.36336e-39	FBGN0003415, FBGN0026597, FBGN0002783, FBGN0003716, FBGN0262029, FBGN0000490, FBGN0000117, FBGN0001075, FBGN0004647, FBGN0011817, FBGN0000497, FBGN0000499, FBGN0004644, FBGN0004009, FBGN0260003, FBGN0011715, FBGN0263289, FBGN0016797, FBGN0000463, FBGN0003079, FBGN0002576, FBGN0003731, FBGN0013263, FBGN0010382, FBGN0003256, FBGN0002643, FBGN0014020, FBGN0011648, FBGN0261885, FBGN0013718, FBGN00010…	111	444	10386	10.7476	1.46152e-36	9.13451e-38	2.17315e-36
GOTERM_BP_4	GO:0035107~appendage morphogenesis	51	45.9459	1.91268e-39	FBGN0003415, FBGN0026597, FBGN0002783, FBGN0003716, FBGN0262029, FBGN0000490, FBGN0000117, FBGN0001075, FBGN0004647, FBGN0011817, FBGN0000497, FBGN0000499, FBGN0004644, FBGN0004009, FBGN0260003, FBGN0011715, FBGN0263289, FBGN0016797, FBGN0000463, FBGN0003079, FBGN0002576, FBGN0003731, FBGN0013263, FBGN0010382, FBGN0003256, FBGN0002643, FBGN0014020, FBGN0011648, FBGN0261885, FBGN0013718, FBGN00010…	111	447	10386	10.6755	2.05039e-36	1.13911e-37	3.04875e-36
GOTERM_BP_4	GO:0048737~imaginal disc-derived appendage development	51	45.9459	2.3936e-39	FBGN0003415, FBGN0026597, FBGN0002783, FBGN0003716, FBGN0262029, FBGN0000490, FBGN0000117, FBGN0001075, FBGN0004647, FBGN0011817, FBGN0000497, FBGN0000499, FBGN0004644, FBGN0004009, FBGN0260003, FBGN0011715, FBGN0263289, FBGN0016797, FBGN0000463, FBGN0003079, FBGN0002576, FBGN0003731, FBGN0013263, FBGN0010382, FBGN0003256, FBGN0002643, FBGN0014020, FBGN0011648, FBGN0261885, FBGN0013718, FBGN00010…	111	449	10386	10.6279	2.56594e-36	1.35049e-37	3.81532e-36
GOTERM_BP_4	GO:0048736~appendage development	51	45.9459	4.17313e-39	FBGN0003415, FBGN0026597, FBGN0002783, FBGN0003716, FBGN0262029, FBGN0000490, FBGN0000117, FBGN0001075, FBGN0004647, FBGN0011817, FBGN0000497, FBGN0000499, FBGN0004644, FBGN0004009, FBGN0260003, FBGN0011715, FBGN0263289, FBGN0016797, FBGN0000463, FBGN0003079, FBGN0002576, FBGN0003731, FBGN0013263, FBGN0010382, FBGN0003256, FBGN0002643, FBGN0014020, FBGN0011648, FBGN0261885, FBGN0013718, FBGN00010…	111	454	10386	10.5109	4.4736e-36	2.2368e-37	6.65184e-36
GOTERM_BP_4	GO:0048707~instar larval or pupal morphogenesis	55	49.5495	6.66709e-38	FBGN0026597, FBGN0003716, FBGN0262029, FBGN0001075, FBGN0004009, FBGN0260003, FBGN0263289, FBGN0010382, FBGN0014020, FBGN0013718, FBGN0261885, FBGN0003175, FBGN0004657, FBGN0011766, FBGN0010333, FBGN0003997, FBGN0023172, FBGN0003892, FBGN0001169, FBGN0265434, FBGN0002783, FBGN0003415, FBGN0000490, FBGN0000117, FBGN0004647, FBGN0011817, FBGN0000497, FBGN0004644, FBGN0000499, FBGN0000635, FBGN00117…	111	601	10386	8.56276	7.14712e-35	3.10744e-36	1.06271e-34
GOTERM_BP_4	GO:0009886~post-embryonic morphogenesis	55	49.5495	1.90182e-37	FBGN0026597, FBGN0003716, FBGN0262029, FBGN0001075, FBGN0004009, FBGN0260003, FBGN0263289, FBGN0010382, FBGN0014020, FBGN0013718, FBGN0261885, FBGN0003175, FBGN0004657, FBGN0011766, FBGN0010333, FBGN0003997, FBGN0023172, FBGN0003892, FBGN0001169, FBGN0265434, FBGN0002783, FBGN0003415, FBGN0000490, FBGN0000117, FBGN0004647, FBGN0011817, FBGN0000497, FBGN0004644, FBGN0000499, FBGN0000635, FBGN00117…	111	613	10386	8.39513	2.03875e-34	8.49479e-36	3.03144e-34
GOTERM_BP_4	GO:0007552~metamorphosis	55	49.5495	5.77038e-37	FBGN0026597, FBGN0003716, FBGN0262029, FBGN0001075, FBGN0004009, FBGN0260003, FBGN0263289, FBGN0010382, FBGN0014020, FBGN0013718, FBGN0261885, FBGN0003175, FBGN0004657, FBGN0011766, FBGN0010333, FBGN0003997, FBGN0023172, FBGN0003892, FBGN0001169, FBGN0265434, FBGN0002783, FBGN0003415, FBGN0000490, FBGN0000117, FBGN0004647, FBGN0011817, FBGN0000497, FBGN0004644, FBGN0000499, FBGN0000635, FBGN00117…	111	626	10386	8.22079	6.18584e-34	2.47434e-35	9.1978e-34
GOTERM_BP_4	GO:0009791~post-embryonic development	59	53.1532	6.92067e-36	FBGN0026597, FBGN0003716, FBGN0262029, FBGN0001075, FBGN0004009, FBGN0260003, FBGN0263289, FBGN0010382, FBGN0027053, FBGN0003371, FBGN0014020, FBGN0013718, FBGN0261885, FBGN0003175, FBGN0004657, FBGN0011766, FBGN0010333, FBGN0003997, FBGN0023172, FBGN0003892, FBGN0001169, FBGN0265434, FBGN0002783, FBGN0003415, FBGN0000490, FBGN0000117, FBGN0004647, FBGN0011817, FBGN0000497, FBGN0004644, FBGN00004…	111	801	10386	6.89199	7.41896e-33	2.85344e-34	1.10313e-32
GOTERM_BP_4	GO:0035220~wing disc development	50	45.045	2.62796e-35	FBGN0003415, FBGN0026597, FBGN0002783, FBGN0003716, FBGN0262029, FBGN0000490, FBGN0000117, FBGN0001075, FBGN0004647, FBGN0011817, FBGN0000497, FBGN0000499, FBGN0004644, FBGN0004009, FBGN0260003, FBGN0011715, FBGN0263289, FBGN0016797, FBGN0000463, FBGN0003079, FBGN0003731, FBGN0013263, FBGN0010382, FBGN0053554, FBGN0003256, FBGN0002643, FBGN0003371, FBGN0014020, FBGN0011648, FBGN0003053, FBGN02618…	111	511	10386	9.15534	2.81717e-32	1.00613e-33	4.18888e-32
GOTERM_BP_4	GO:0002165~instar larval or pupal development	56	50.4505	3.17306e-35	FBGN0026597, FBGN0003716, FBGN0262029, FBGN0001075, FBGN0004009, FBGN0260003, FBGN0263289, FBGN0010382, FBGN0003371, FBGN0014020, FBGN0013718, FBGN0261885, FBGN0003175, FBGN0004657, FBGN0011766, FBGN0010333, FBGN0003997, FBGN0023172, FBGN0003892, FBGN0001169, FBGN0265434, FBGN0002783, FBGN0003415, FBGN0000490, FBGN0000117, FBGN0004647, FBGN0011817, FBGN0000497, FBGN0004644, FBGN0000499, FBGN00006…	111	711	10386	7.3696	3.40152e-32	1.17294e-33	5.05776e-32
GOTERM_BP_4	GO:0035120~post-embryonic appendage morphogenesis	47	42.3423	6.72807e-35	FBGN0003415, FBGN0002783, FBGN0026597, FBGN0003716, FBGN0262029, FBGN0000490, FBGN0000117, FBGN0001075, FBGN0004647, FBGN0011817, FBGN0000497, FBGN0000499, FBGN0004644, FBGN0260003, FBGN0004009, FBGN0263289, FBGN0011715, FBGN0016797, FBGN0000463, FBGN0003079, FBGN0003731, FBGN0013263, FBGN0010382, FBGN0003256, FBGN0002643, FBGN0014020, FBGN0011648, FBGN0013718, FBGN0261885, FBGN0001085, FBGN00031…	111	434	10386	10.1329	7.21249e-32	2.40416e-33	1.07243e-31
Annotation Cluster 2	Enrichment Score: 40.978650602506306
Category	Term	Count	%	PValue	Genes	List Total	Pop Hits	Pop Total	Fold Enrichment	Bonferroni	Benjamini	FDR
GOTERM_BP_4	GO:0048468~cell development	86	77.4775	2.86445e-44	FBGN0026597, FBGN0000928, FBGN0250876, FBGN0003716, FBGN0025641, FBGN0001075, FBGN0001233, FBGN0004861, FBGN0004009, FBGN0263289, FBGN0261617, FBGN0010382, FBGN0027053, FBGN0003371, FBGN0014020, FBGN0261885, FBGN0005592, FBGN0004657, FBGN0015509, FBGN0266579, FBGN0011766, FBGN0010333, FBGN0030057, FBGN0011829, FBGN0003997, FBGN0011260, FBGN0011763, FBGN0010473, FBGN0260642, FBGN0014388, FBGN02597…	111	1765	10386	4.5591	3.07069e-41	3.07069e-42	4.56585e-41
GOTERM_BP_4	GO:0007399~nervous system development	84	75.6757	8.32967e-42	FBGN0250876, FBGN0003716, FBGN0025641, FBGN0001075, FBGN0001233, FBGN0034789, FBGN0004861, FBGN0004009, FBGN0263289, FBGN0261617, FBGN0010382, FBGN0027053, FBGN0003371, FBGN0014020, FBGN0017590, FBGN0261885, FBGN0033483, FBGN0005592, FBGN0004657, FBGN0015509, FBGN0266579, FBGN0011766, FBGN0010333, FBGN0030057, FBGN0011829, FBGN0003997, FBGN0011260, FBGN0010473, FBGN0260642, FBGN0014388, FBGN02597…	111	1767	10386	4.44803	8.92941e-39	6.37815e-40	1.32772e-38
GOTERM_BP_4	GO:0030154~cell differentiation	93	83.7838	4.85712e-39	FBGN0026597, FBGN0000928, FBGN0250876, FBGN0003716, FBGN0025641, FBGN0001075, FBGN0001233, FBGN0004861, FBGN0004009, FBGN0263289, FBGN0261617, FBGN0010382, FBGN0027053, FBGN0003371, FBGN0014020, FBGN0017590, FBGN0261885, FBGN0013718, FBGN0033483, FBGN0005592, FBGN0004657, FBGN0015509, FBGN0266579, FBGN0011766, FBGN0010333, FBGN0030057, FBGN0011829, FBGN0003997, FBGN0011260, FBGN0011763, FBGN00104…	111	2562	10386	3.39648	5.20683e-36	2.47944e-37	7.74209e-36
Annotation Cluster 3	Enrichment Score: 33.97365207457648
Category	Term	Count	%	PValue	Genes	List Total	Pop Hits	Pop Total	Fold Enrichment	Bonferroni	Benjamini	FDR
GOTERM_BP_4	GO:0007423~sensory organ development	54	48.6486	5.39334e-38	FBGN0003716, FBGN0262029, FBGN0001075, FBGN0001233, FBGN0003339, FBGN0004009, FBGN0263289, FBGN0261617, FBGN0010382, FBGN0027053, FBGN0003371, FBGN0014020, FBGN0017590, FBGN0013718, FBGN0266579, FBGN0010333, FBGN0003997, FBGN0000625, FBGN0010473, FBGN0014388, FBGN0003892, FBGN0001169, FBGN0003415, FBGN0000490, FBGN0000117, FBGN0004647, FBGN0011817, FBGN0005561, FBGN0000497, FBGN0004644, FBGN00004…	111	567	10386	8.9112	5.78166e-35	2.62803e-36	8.59682e-35
GOTERM_BP_4	GO:0090596~sensory organ morphogenesis	43	38.7387	3.66903e-33	FBGN0003716, FBGN0262029, FBGN0000490, FBGN0000117, FBGN0001075, FBGN0004647, FBGN0011817, FBGN0001233, FBGN0005561, FBGN0000497, FBGN0000499, FBGN0004644, FBGN0004009, FBGN0003391, FBGN0000635, FBGN0263289, FBGN0001291, FBGN0000463, FBGN0261617, FBGN0002576, FBGN0003731, FBGN0010382, FBGN0003256, FBGN0027053, FBGN0013433, FBGN0000320, FBGN0014020, FBGN0003053, FBGN0011648, FBGN0017590, FBGN00010…	111	364	10386	11.0533	3.9332e-30	1.06303e-31	5.84832e-30
GOTERM_BP_4	GO:0001654~eye development	46	41.4414	6.06226e-33	FBGN0003415, FBGN0003716, FBGN0262029, FBGN0000490, FBGN0000117, FBGN0001075, FBGN0004647, FBGN0011817, FBGN0001233, FBGN0005561, FBGN0000497, FBGN0000499, FBGN0004644, FBGN0004009, FBGN0003391, FBGN0000635, FBGN0263289, FBGN0001291, FBGN0000463, FBGN0261617, FBGN0002576, FBGN0003731, FBGN0010382, FBGN0003256, FBGN0027053, FBGN0013433, FBGN0002643, FBGN0000320, FBGN0014020, FBGN0003053, FBGN00116…	111	450	10386	9.56468	6.49874e-30	1.7102e-31	9.66306e-30
Annotation Cluster 4	Enrichment Score: 29.863933568431587
Category	Term	Count	%	PValue	Genes	List Total	Pop Hits	Pop Total	Fold Enrichment	Bonferroni	Benjamini	FDR
GOTERM_BP_4	GO:0002009~morphogenesis of an epithelium	67	60.3604	1.2014e-48	FBGN0026597, FBGN0003716, FBGN0262029, FBGN0001075, FBGN0004861, FBGN0004009, FBGN0260003, FBGN0263289, FBGN0261617, FBGN0010382, FBGN0027053, FBGN0014020, FBGN0261885, FBGN0013718, FBGN0005592, FBGN0003175, FBGN0004657, FBGN0011766, FBGN0010333, FBGN0003997, FBGN0011763, FBGN0014388, FBGN0259749, FBGN0023172, FBGN0003892, FBGN0001169, FBGN0265434, FBGN0003415, FBGN0002783, FBGN0000490, FBGN00001…	111	721	10386	8.69491	1.2879e-45	2.1465e-46	1.915e-45
GOTERM_BP_4	GO:0060429~epithelium development	75	67.5676	1.97253e-44	FBGN0026597, FBGN0000928, FBGN0003716, FBGN0262029, FBGN0001075, FBGN0004861, FBGN0004009, FBGN0260003, FBGN0263289, FBGN0261617, FBGN0010382, FBGN0053554, FBGN0027053, FBGN0003371, FBGN0014020, FBGN0261885, FBGN0013718, FBGN0005592, FBGN0003175, FBGN0004657, FBGN0011766, FBGN0010333, FBGN0003997, FBGN0000625, FBGN0011763, FBGN0014388, FBGN0259749, FBGN0023172, FBGN0003892, FBGN0001169, FBGN02654…	111	1171	10386	5.9928	2.11455e-41	2.3495e-42	3.14415e-41
GOTERM_BP_4	GO:0009790~embryo development	54	48.6486	7.53925e-35	FBGN0250876, FBGN0003716, FBGN0001233, FBGN0004861, FBGN0003339, FBGN0004009, FBGN0263289, FBGN0027053, FBGN0003371, FBGN0014020, FBGN0003751, FBGN0004657, FBGN0010333, FBGN0003997, FBGN0260642, FBGN0014388, FBGN0259749, FBGN0023172, FBGN0003892, FBGN0265434, FBGN0003042, FBGN0000490, FBGN0000117, FBGN0003041, FBGN0004647, FBGN0004644, FBGN0000499, FBGN0003391, FBGN0001291, FBGN0000463, FBGN00030…	111	652	10386	7.74946	8.08208e-32	2.60712e-33	1.20173e-31
GOTERM_BP_4	GO:0048477~oogenesis	53	47.7477	2.49466e-29	FBGN0026597, FBGN0000928, FBGN0003716, FBGN0001233, FBGN0004861, FBGN0004009, FBGN0263289, FBGN0261617, FBGN0010382, FBGN0027053, FBGN0003371, FBGN0014020, FBGN0005592, FBGN0004657, FBGN0011766, FBGN0010333, FBGN0003997, FBGN0011763, FBGN0014388, FBGN0003892, FBGN0265434, FBGN0002781, FBGN0000490, FBGN0000117, FBGN0003041, FBGN0004647, FBGN0004644, FBGN0000499, FBGN0003391, FBGN0001291, FBGN00004…	111	798	10386	6.21439	2.67427e-26	6.36732e-28	3.97641e-26
GOTERM_BP_4	GO:0007292~female gamete generation	53	47.7477	4.06143e-29	FBGN0026597, FBGN0000928, FBGN0003716, FBGN0001233, FBGN0004861, FBGN0004009, FBGN0263289, FBGN0261617, FBGN0010382, FBGN0027053, FBGN0003371, FBGN0014020, FBGN0005592, FBGN0004657, FBGN0011766, FBGN0010333, FBGN0003997, FBGN0011763, FBGN0014388, FBGN0003892, FBGN0265434, FBGN0002781, FBGN0000490, FBGN0000117, FBGN0003041, FBGN0004647, FBGN0004644, FBGN0000499, FBGN0003391, FBGN0001291, FBGN00004…	111	806	10386	6.15271	4.35385e-26	1.01252e-27	6.4738e-26
GOTERM_BP_4	GO:0030707~ovarian follicle cell development	38	34.2342	3.38476e-27	FBGN0000928, FBGN0003716, FBGN0000490, FBGN0000117, FBGN0004647, FBGN0004861, FBGN0000499, FBGN0004644, FBGN0004009, FBGN0003391, FBGN0263289, FBGN0001291, FBGN0000463, FBGN0261617, FBGN0003079, FBGN0003731, FBGN0000229, FBGN0010382, FBGN0002643, FBGN0003371, FBGN0000320, FBGN0014020, FBGN0003053, FBGN0011648, FBGN0005592, FBGN0001085, FBGN0004657, FBGN0011766, FBGN0010333, FBGN0266521, FBGN00046…	111	359	10386	9.90409	3.62846e-24	7.40502e-26	5.3952e-24
GOTERM_BP_4	GO:0002064~epithelial cell development	39	35.1351	8.14448e-27	FBGN0000928, FBGN0003716, FBGN0000490, FBGN0000117, FBGN0004647, FBGN0004861, FBGN0000499, FBGN0004644, FBGN0004009, FBGN0003391, FBGN0263289, FBGN0001291, FBGN0000463, FBGN0261617, FBGN0003079, FBGN0003731, FBGN0000229, FBGN0010382, FBGN0002643, FBGN0003371, FBGN0000320, FBGN0014020, FBGN0003053, FBGN0011648, FBGN0005592, FBGN0001085, FBGN0004657, FBGN0011766, FBGN0010333, FBGN0266521, FBGN00046…	111	396	10386	9.21499	8.73089e-24	1.71194e-25	1.29821e-23
GOTERM_BP_4	GO:0007281~germ cell development	53	47.7477	3.31904e-26	FBGN0026597, FBGN0000928, FBGN0003716, FBGN0001233, FBGN0004861, FBGN0004009, FBGN0263289, FBGN0261617, FBGN0010382, FBGN0027053, FBGN0003371, FBGN0014020, FBGN0005592, FBGN0004657, FBGN0011766, FBGN0010333, FBGN0003997, FBGN0011763, FBGN0014388, FBGN0003892, FBGN0265434, FBGN0002781, FBGN0000490, FBGN0000117, FBGN0003041, FBGN0004647, FBGN0004644, FBGN0000499, FBGN0003391, FBGN0001291, FBGN00004…	111	926	10386	5.35538	3.55801e-23	6.71323e-25	5.29045e-23
GOTERM_BP_4	GO:0022412~cellular process involved in reproduction in multicellular organism	54	48.6486	1.11536e-25	FBGN0026597, FBGN0000928, FBGN0003716, FBGN0001233, FBGN0004861, FBGN0004009, FBGN0263289, FBGN0261617, FBGN0010382, FBGN0027053, FBGN0003371, FBGN0014020, FBGN0005592, FBGN0004657, FBGN0011766, FBGN0010333, FBGN0003997, FBGN0011763, FBGN0014388, FBGN0023172, FBGN0003892, FBGN0265434, FBGN0002781, FBGN0000490, FBGN0000117, FBGN0003041, FBGN0004647, FBGN0004644, FBGN0000499, FBGN0003391, FBGN00012…	111	995	10386	5.07804	1.19566e-22	2.21419e-24	1.77784e-22
GOTERM_BP_4	GO:0007276~gamete generation	54	48.6486	1.62825e-23	FBGN0026597, FBGN0000928, FBGN0003716, FBGN0001233, FBGN0004861, FBGN0004009, FBGN0263289, FBGN0261617, FBGN0010382, FBGN0027053, FBGN0003371, FBGN0014020, FBGN0005592, FBGN0004657, FBGN0011766, FBGN0010333, FBGN0003997, FBGN0011763, FBGN0014388, FBGN0023172, FBGN0003892, FBGN0265434, FBGN0002781, FBGN0000490, FBGN0000117, FBGN0003041, FBGN0004647, FBGN0004644, FBGN0000499, FBGN0003391, FBGN00012…	111	1104	10386	4.57667	1.74549e-20	3.06226e-22	2.59539e-20
GOTERM_BP_4	GO:0019953~sexual reproduction	55	49.5495	1.04343e-20	FBGN0026597, FBGN0000928, FBGN0003716, FBGN0001233, FBGN0004861, FBGN0261239, FBGN0004009, FBGN0263289, FBGN0261617, FBGN0010382, FBGN0027053, FBGN0003371, FBGN0014020, FBGN0005592, FBGN0004657, FBGN0011766, FBGN0010333, FBGN0003997, FBGN0011763, FBGN0014388, FBGN0023172, FBGN0003892, FBGN0265434, FBGN0002781, FBGN0000490, FBGN0000117, FBGN0003041, FBGN0004647, FBGN0004644, FBGN0000499, FBGN00033…	111	1321	10386	3.8957	1.11855e-17	1.69478e-19	1.66319e-17
Annotation Cluster 5	Enrichment Score: 27.945029557075397
Category	Term	Count	%	PValue	Genes	List Total	Pop Hits	Pop Total	Fold Enrichment	Bonferroni	Benjamini	FDR
GOTERM_BP_4	GO:0032989~cellular component morphogenesis	63	56.7568	1.29538e-35	FBGN0000928, FBGN0250876, FBGN0003716, FBGN0025641, FBGN0001075, FBGN0001233, FBGN0004861, FBGN0004009, FBGN0263289, FBGN0010382, FBGN0027053, FBGN0003371, FBGN0014020, FBGN0005592, FBGN0004657, FBGN0266579, FBGN0011766, FBGN0010333, FBGN0030057, FBGN0003997, FBGN0011260, FBGN0011763, FBGN0010473, FBGN0023172, FBGN0003892, FBGN0265434, FBGN0086680, FBGN0000490, FBGN0000117, FBGN0004647, FBGN00030…	111	972	10386	6.06456	1.38865e-32	5.14313e-34	2.06479e-32
GOTERM_BP_4	GO:0000904~cell morphogenesis involved in differentiation	51	45.9459	1.24814e-34	FBGN0000928, FBGN0250876, FBGN0025641, FBGN0001075, FBGN0004861, FBGN0027053, FBGN0003371, FBGN0014020, FBGN0005592, FBGN0004657, FBGN0266579, FBGN0011766, FBGN0010333, FBGN0003997, FBGN0030057, FBGN0011260, FBGN0010473, FBGN0023172, FBGN0003892, FBGN0086680, FBGN0003041, FBGN0004647, FBGN0005561, FBGN0000497, FBGN0004644, FBGN0000499, FBGN0003391, FBGN0000635, FBGN0011715, FBGN0000463, FBGN00167…	111	559	10386	8.53658	1.33801e-31	4.18127e-33	1.9895e-31
GOTERM_BP_4	GO:0000902~cell morphogenesis	59	53.1532	1.44677e-34	FBGN0000928, FBGN0250876, FBGN0003716, FBGN0025641, FBGN0001075, FBGN0001233, FBGN0004861, FBGN0004009, FBGN0263289, FBGN0010382, FBGN0027053, FBGN0003371, FBGN0014020, FBGN0005592, FBGN0004657, FBGN0266579, FBGN0011766, FBGN0010333, FBGN0003997, FBGN0030057, FBGN0011260, FBGN0010473, FBGN0023172, FBGN0003892, FBGN0086680, FBGN0000490, FBGN0000117, FBGN0004647, FBGN0003041, FBGN0005561, FBGN00004…	111	846	10386	6.5254	1.55094e-31	4.56159e-33	2.30611e-31
GOTERM_BP_4	GO:0048666~neuron development	55	49.5495	2.81842e-32	FBGN0250876, FBGN0025641, FBGN0004861, FBGN0027053, FBGN0014020, FBGN0005592, FBGN0004657, FBGN0015509, FBGN0266579, FBGN0011766, FBGN0010333, FBGN0003997, FBGN0030057, FBGN0011829, FBGN0011260, FBGN0010473, FBGN0014388, FBGN0259749, FBGN0023172, FBGN0003892, FBGN0086680, FBGN0003042, FBGN0003041, FBGN0004647, FBGN0005561, FBGN0004644, FBGN0000499, FBGN0003391, FBGN0000635, FBGN0011715, FBGN00167…	111	770	10386	6.6834	3.02134e-29	7.74704e-31	4.49247e-29
GOTERM_BP_4	GO:0031175~neuron projection development	48	43.2432	6.15232e-29	FBGN0086680, FBGN0250876, FBGN0025641, FBGN0004647, FBGN0003041, FBGN0005561, FBGN0000499, FBGN0004644, FBGN0000635, FBGN0003391, FBGN0011715, FBGN0016797, FBGN0000229, FBGN0027053, FBGN0013433, FBGN0000320, FBGN0014020, FBGN0003053, FBGN0264089, FBGN0000606, FBGN0005631, FBGN0005592, FBGN0001085, FBGN0004657, FBGN0266579, FBGN0011766, FBGN0010333, FBGN0013733, FBGN0003997, FBGN0011829, FBGN02665…	111	624	10386	7.19751	6.59528e-26	1.49893e-27	9.80661e-26
GOTERM_BP_4	GO:0006935~chemotaxis	36	32.4324	2.60591e-28	FBGN0086680, FBGN0250876, FBGN0000490, FBGN0025641, FBGN0004647, FBGN0004644, FBGN0000499, FBGN0003391, FBGN0000635, FBGN0011715, FBGN0016797, FBGN0000229, FBGN0013433, FBGN0000320, FBGN0014020, FBGN0003053, FBGN0011648, FBGN0000606, FBGN0264089, FBGN0005631, FBGN0001085, FBGN0004657, FBGN0010333, FBGN0013733, FBGN0030057, FBGN0011260, FBGN0005775, FBGN0010473, FBGN0004198, FBGN0035574, FBGN00109…	111	285	10386	11.8191	2.79354e-25	6.20786e-27	4.15374e-25
GOTERM_BP_4	GO:0097485~neuron projection guidance	31	27.9279	9.67451e-23	FBGN0086680, FBGN0250876, FBGN0025641, FBGN0004647, FBGN0000499, FBGN0003391, FBGN0000635, FBGN0011715, FBGN0016797, FBGN0000229, FBGN0013433, FBGN0000320, FBGN0014020, FBGN0003053, FBGN0000606, FBGN0264089, FBGN0005631, FBGN0001085, FBGN0004657, FBGN0010333, FBGN0013733, FBGN0011260, FBGN0010473, FBGN0004198, FBGN0035574, FBGN0010909, FBGN0003892, FBGN0030941, FBGN0000212, FBGN0005677, FBGN00104…	111	273	10386	10.6249	1.03711e-19	1.72851e-21	1.54209e-19
GOTERM_BP_4	GO:0048858~cell projection morphogenesis	41	36.9369	1.26348e-20	FBGN0086680, FBGN0250876, FBGN0025641, FBGN0004647, FBGN0005561, FBGN0000499, FBGN0004644, FBGN0003391, FBGN0000635, FBGN0011715, FBGN0016797, FBGN0000229, FBGN0027053, FBGN0013433, FBGN0000320, FBGN0014020, FBGN0003053, FBGN0264089, FBGN0000606, FBGN0005631, FBGN0005592, FBGN0001085, FBGN0004657, FBGN0266579, FBGN0011766, FBGN0010333, FBGN0013733, FBGN0003997, FBGN0030057, FBGN0004635, FBGN00112…	111	666	10386	5.76017	1.35445e-17	2.02157e-19	2.01395e-17
GOTERM_BP_4	GO:0032990~cell part morphogenesis	41	36.9369	2.41808e-20	FBGN0086680, FBGN0250876, FBGN0025641, FBGN0004647, FBGN0005561, FBGN0000499, FBGN0004644, FBGN0003391, FBGN0000635, FBGN0011715, FBGN0016797, FBGN0000229, FBGN0027053, FBGN0013433, FBGN0000320, FBGN0014020, FBGN0003053, FBGN0264089, FBGN0000606, FBGN0005631, FBGN0005592, FBGN0001085, FBGN0004657, FBGN0266579, FBGN0011766, FBGN0010333, FBGN0013733, FBGN0003997, FBGN0030057, FBGN0004635, FBGN00112…	111	678	10386	5.65822	2.59218e-17	3.70312e-19	3.85435e-17
Annotation Cluster 6	Enrichment Score: 25.97002771836153
Category	Term	Count	%	PValue	Genes	List Total	Pop Hits	Pop Total	Fold Enrichment	Bonferroni	Benjamini	FDR
GOTERM_BP_4	GO:0007166~cell surface receptor signaling pathway	55	49.5495	8.16072e-34	FBGN0026597, FBGN0250876, FBGN0003716, FBGN0001075, FBGN0001233, FBGN0004009, FBGN0263289, FBGN0261617, FBGN0053554, FBGN0003371, FBGN0014020, FBGN0003751, FBGN0261885, FBGN0033483, FBGN0005592, FBGN0004657, FBGN0015509, FBGN0010333, FBGN0011260, FBGN0014388, FBGN0003892, FBGN0001169, FBGN0003415, FBGN0000490, FBGN0000117, FBGN0004647, FBGN0003041, FBGN0011817, FBGN0004644, FBGN0000499, FBGN00006…	111	719	10386	7.15746	8.74829e-31	2.49951e-32	1.30079e-30
GOTERM_BP_4	GO:0007165~signal transduction	68	61.2613	6.41106e-28	FBGN0026597, FBGN0250876, FBGN0003716, FBGN0001075, FBGN0001233, FBGN0034789, FBGN0261239, FBGN0004009, FBGN0263289, FBGN0261617, FBGN0010382, FBGN0053554, FBGN0003371, FBGN0014020, FBGN0003751, FBGN0261885, FBGN0033483, FBGN0005592, FBGN0004657, FBGN0015509, FBGN0010333, FBGN0011829, FBGN0003997, FBGN0011260, FBGN0011763, FBGN0014388, FBGN0023172, FBGN0003892, FBGN0001169, FBGN0003415, FBGN00004…	111	1594	10386	3.99159	6.87266e-25	1.46227e-26	1.0219e-24
GOTERM_BP_4	GO:0009966~regulation of signal transduction	40	36.036	2.35103e-18	FBGN0003415, FBGN0026597, FBGN0000490, FBGN0001075, FBGN0004647, FBGN0003041, FBGN0011817, FBGN0000499, FBGN0004644, FBGN0000635, FBGN0263289, FBGN0003079, FBGN0003731, FBGN0002121, FBGN0000229, FBGN0053554, FBGN0003256, FBGN0003371, FBGN0000320, FBGN0014020, FBGN0003053, FBGN0261885, FBGN0264895, FBGN0005592, FBGN0001085, FBGN0015509, FBGN0011591, FBGN0004635, FBGN0004198, FBGN0014388, FBGN00261…	111	727	10386	5.14815	2.5203e-15	3.19026e-17	3.74747e-15
Annotation Cluster 7	Enrichment Score: 21.87127451483647
Category	Term	Count	%	PValue	Genes	List Total	Pop Hits	Pop Total	Fold Enrichment	Bonferroni	Benjamini	FDR
GOTERM_BP_4	GO:0060284~regulation of cell development	40	36.036	1.43926e-34	FBGN0002783, FBGN0086680, FBGN0250876, FBGN0025641, FBGN0004647, FBGN0003041, FBGN0005561, FBGN0000499, FBGN0004009, FBGN0000635, FBGN0000463, FBGN0003079, FBGN0002576, FBGN0003731, FBGN0002121, FBGN0000229, FBGN0003256, FBGN0014020, FBGN0003053, FBGN0004875, FBGN0264089, FBGN0261885, FBGN0000606, FBGN0005631, FBGN0005592, FBGN0001085, FBGN0011766, FBGN0010333, FBGN0013733, FBGN0003997, FBGN00300…	111	269	10386	13.9134	1.54289e-31	4.67542e-33	2.29414e-31
GOTERM_BP_4	GO:0051960~regulation of nervous system development	38	34.2342	2.20805e-29	FBGN0002783, FBGN0086680, FBGN0250876, FBGN0003716, FBGN0025641, FBGN0004647, FBGN0003041, FBGN0011817, FBGN0005561, FBGN0034789, FBGN0000499, FBGN0000635, FBGN0000463, FBGN0003079, FBGN0002121, FBGN0000229, FBGN0003256, FBGN0003371, FBGN0014020, FBGN0011648, FBGN0264089, FBGN0261885, FBGN0000606, FBGN0005592, FBGN0005631, FBGN0001085, FBGN0010333, FBGN0013733, FBGN0030057, FBGN0011260, FBGN00104…	111	313	10386	11.3596	2.36703e-26	5.77325e-28	3.51957e-26
GOTERM_BP_4	GO:0050767~regulation of neurogenesis	32	28.8288	3.02379e-27	FBGN0002783, FBGN0086680, FBGN0250876, FBGN0025641, FBGN0004647, FBGN0003041, FBGN0005561, FBGN0000499, FBGN0000635, FBGN0000463, FBGN0003079, FBGN0002121, FBGN0000229, FBGN0003256, FBGN0014020, FBGN0000606, FBGN0261885, FBGN0264089, FBGN0005592, FBGN0005631, FBGN0001085, FBGN0010333, FBGN0013733, FBGN0030057, FBGN0011260, FBGN0010473, FBGN0014388, FBGN0026181, FBGN0003205, FBGN0000097, FBGN00231…	111	214	10386	13.9914	3.24151e-24	6.75314e-26	4.81984e-24
GOTERM_BP_4	GO:0022604~regulation of cell morphogenesis	26	23.4234	8.00593e-20	FBGN0086680, FBGN0250876, FBGN0000490, FBGN0000117, FBGN0025641, FBGN0003041, FBGN0001233, FBGN0000499, FBGN0000635, FBGN0004009, FBGN0002121, FBGN0010382, FBGN0014020, FBGN0264089, FBGN0000606, FBGN0005592, FBGN0001085, FBGN0004657, FBGN0013733, FBGN0010333, FBGN0030057, FBGN0011260, FBGN0010473, FBGN0026181, FBGN0010909, FBGN0023172	111	210	10386	11.5846	8.58236e-17	1.20878e-18	1.27612e-16
GOTERM_BP_4	GO:0010769~regulation of cell morphogenesis involved in differentiation	17	15.3153	7.30201e-16	FBGN0086680, FBGN0250876, FBGN0000606, FBGN0264089, FBGN0005592, FBGN0001085, FBGN0025641, FBGN0013733, FBGN0010333, FBGN0030057, FBGN0003041, FBGN0011260, FBGN0000499, FBGN0010473, FBGN0026181, FBGN0023172, FBGN0014020	111	89	10386	17.8725	8.33111e-13	8.65974e-15	1.24345e-12
GOTERM_BP_4	GO:0060560~developmental growth involved in morphogenesis	17	15.3153	1.05795e-15	FBGN0250876, FBGN0264089, FBGN0003716, FBGN0005592, FBGN0001085, FBGN0004657, FBGN0025641, FBGN0000117, FBGN0013733, FBGN0010333, FBGN0011260, FBGN0000499, FBGN0004009, FBGN0016797, FBGN0023172, FBGN0000229, FBGN0014020	111	91	10386	17.4797	1.19016e-12	1.21014e-14	1.76525e-12
GOTERM_BP_4	GO:0031344~regulation of cell projection organization	19	17.1171	1.33985e-15	FBGN0086680, FBGN0250876, FBGN0000606, FBGN0264089, FBGN0005592, FBGN0005631, FBGN0001085, FBGN0025641, FBGN0010333, FBGN0013733, FBGN0030057, FBGN0003041, FBGN0004647, FBGN0011260, FBGN0000499, FBGN0010473, FBGN0026181, FBGN0023172, FBGN0014020	111	130	10386	13.6753	1.42819e-12	1.43219e-14	2.12053e-12
Annotation Cluster 8	Enrichment Score: 20.7373329574954
Category	Term	Count	%	PValue	Genes	List Total	Pop Hits	Pop Total	Fold Enrichment	Bonferroni	Benjamini	FDR
GOTERM_BP_4	GO:0030707~ovarian follicle cell development	38	34.2342	3.38476e-27	FBGN0000928, FBGN0003716, FBGN0000490, FBGN0000117, FBGN0004647, FBGN0004861, FBGN0000499, FBGN0004644, FBGN0004009, FBGN0003391, FBGN0263289, FBGN0001291, FBGN0000463, FBGN0261617, FBGN0003079, FBGN0003731, FBGN0000229, FBGN0010382, FBGN0002643, FBGN0003371, FBGN0000320, FBGN0014020, FBGN0003053, FBGN0011648, FBGN0005592, FBGN0001085, FBGN0004657, FBGN0011766, FBGN0010333, FBGN0266521, FBGN00046…	111	359	10386	9.90409	3.62846e-24	7.40502e-26	5.3952e-24
GOTERM_BP_4	GO:0002064~epithelial cell development	39	35.1351	8.14448e-27	FBGN0000928, FBGN0003716, FBGN0000490, FBGN0000117, FBGN0004647, FBGN0004861, FBGN0000499, FBGN0004644, FBGN0004009, FBGN0003391, FBGN0263289, FBGN0001291, FBGN0000463, FBGN0261617, FBGN0003079, FBGN0003731, FBGN0000229, FBGN0010382, FBGN0002643, FBGN0003371, FBGN0000320, FBGN0014020, FBGN0003053, FBGN0011648, FBGN0005592, FBGN0001085, FBGN0004657, FBGN0011766, FBGN0010333, FBGN0266521, FBGN00046…	111	396	10386	9.21499	8.73089e-24	1.71194e-25	1.29821e-23
GOTERM_BP_4	GO:0016477~cell migration	33	29.7297	2.20481e-23	FBGN0250876, FBGN0003716, FBGN0002781, FBGN0000490, FBGN0004647, FBGN0003041, FBGN0004644, FBGN0000499, FBGN0003391, FBGN0000463, FBGN0016797, FBGN0261617, FBGN0003079, FBGN0003731, FBGN0000229, FBGN0027053, FBGN0000320, FBGN0014020, FBGN0003053, FBGN0011648, FBGN0264089, FBGN0005592, FBGN0005631, FBGN0001085, FBGN0004657, FBGN0010333, FBGN0266521, FBGN0011260, FBGN0003205, FBGN0000097, FBGN00038…	111	311	10386	9.92839	2.36356e-20	4.00604e-22	3.51441e-20
GOTERM_BP_4	GO:0048870~cell motility	33	29.7297	3.22105e-22	FBGN0250876, FBGN0003716, FBGN0002781, FBGN0000490, FBGN0004647, FBGN0003041, FBGN0004644, FBGN0000499, FBGN0003391, FBGN0000463, FBGN0016797, FBGN0261617, FBGN0003079, FBGN0003731, FBGN0000229, FBGN0027053, FBGN0000320, FBGN0014020, FBGN0003053, FBGN0011648, FBGN0264089, FBGN0005592, FBGN0005631, FBGN0001085, FBGN0004657, FBGN0010333, FBGN0266521, FBGN0011260, FBGN0003205, FBGN0000097, FBGN00038…	111	339	10386	9.10835	3.45296e-19	5.5693e-21	5.13425e-19
GOTERM_BP_4	GO:0001667~ameboidal-type cell migration	26	23.4234	1.63061e-20	FBGN0003053, FBGN0250876, FBGN0264089, FBGN0005631, FBGN0005592, FBGN0001085, FBGN0000490, FBGN0004657, FBGN0010333, FBGN0004647, FBGN0266521, FBGN0003041, FBGN0011260, FBGN0000499, FBGN0004644, FBGN0003391, FBGN0000463, FBGN0003079, FBGN0003205, FBGN0003731, FBGN0000097, FBGN0000229, FBGN0003892, FBGN0014020, FBGN0010415, FBGN0265434	111	197	10386	12.349	1.74801e-17	2.57061e-19	2.59914e-17
GOTERM_BP_4	GO:0090132~epithelium migration	23	20.7207	9.44199e-18	FBGN0003053, FBGN0264089, FBGN0005592, FBGN0005631, FBGN0001085, FBGN0000490, FBGN0004657, FBGN0010333, FBGN0266521, FBGN0004647, FBGN0004644, FBGN0000499, FBGN0003391, FBGN0000463, FBGN0003079, FBGN0000097, FBGN0003205, FBGN0003731, FBGN0000229, FBGN0003892, FBGN0265434, FBGN0014020, FBGN0010415	111	180	10386	11.9559	1.01218e-14	1.24961e-16	1.50502e-14
GOTERM_BP_4	GO:0007297~ovarian follicle cell migration	17	15.3153	2.28821e-12	FBGN0003053, FBGN0005592, FBGN0001085, FBGN0004657, FBGN0010333, FBGN0266521, FBGN0004647, FBGN0000499, FBGN0003391, FBGN0000463, FBGN0003079, FBGN0000097, FBGN0003731, FBGN0003205, FBGN0000229, FBGN0014020, FBGN0265434	111	146	10386	10.8949	2.45292e-09	2.09651e-11	3.64727e-09
Annotation Cluster 9	Enrichment Score: 17.777643696568788
Category	Term	Count	%	PValue	Genes	List Total	Pop Hits	Pop Total	Fold Enrichment	Bonferroni	Benjamini	FDR
GOTERM_BP_4	GO:0010648~negative regulation of cell communication	29	26.1261	2.743e-19	FBGN0026597, FBGN0001075, FBGN0003041, FBGN0004647, FBGN0011817, FBGN0000499, FBGN0000635, FBGN0003079, FBGN0003731, FBGN0002121, FBGN0000229, FBGN0003371, FBGN0000320, FBGN0014020, FBGN0003053, FBGN0264895, FBGN0033483, FBGN0001085, FBGN0015509, FBGN0011591, FBGN0014388, FBGN0004198, FBGN0003205, FBGN0000097, FBGN0010909, FBGN0003892, FBGN0030941, FBGN0001169, FBGN0002945	111	300	10386	9.04486	2.9405e-16	3.92066e-18	4.37226e-16
GOTERM_BP_4	GO:0009966~regulation of signal transduction	40	36.036	2.35103e-18	FBGN0003415, FBGN0026597, FBGN0000490, FBGN0001075, FBGN0004647, FBGN0003041, FBGN0011817, FBGN0000499, FBGN0004644, FBGN0000635, FBGN0263289, FBGN0003079, FBGN0003731, FBGN0002121, FBGN0000229, FBGN0053554, FBGN0003256, FBGN0003371, FBGN0000320, FBGN0014020, FBGN0003053, FBGN0261885, FBGN0264895, FBGN0005592, FBGN0001085, FBGN0015509, FBGN0011591, FBGN0004635, FBGN0004198, FBGN0014388, FBGN00261…	111	727	10386	5.14815	2.5203e-15	3.19026e-17	3.74747e-15
GOTERM_BP_4	GO:0009968~negative regulation of signal transduction	27	24.3243	7.20419e-18	FBGN0026597, FBGN0001075, FBGN0003041, FBGN0004647, FBGN0011817, FBGN0000499, FBGN0000635, FBGN0003079, FBGN0003731, FBGN0002121, FBGN0000229, FBGN0003371, FBGN0000320, FBGN0014020, FBGN0003053, FBGN0264895, FBGN0001085, FBGN0015509, FBGN0011591, FBGN0014388, FBGN0004198, FBGN0000097, FBGN0003205, FBGN0010909, FBGN0003892, FBGN0001169, FBGN0002945	111	280	10386	9.02259	7.72289e-15	9.65361e-17	1.14833e-14
Annotation Cluster 10	Enrichment Score: 16.452566247784116
Category	Term	Count	%	PValue	Genes	List Total	Pop Hits	Pop Total	Fold Enrichment	Bonferroni	Benjamini	FDR
GOTERM_BP_4	GO:0007507~heart development	21	18.9189	8.41733e-20	FBGN0026597, FBGN0011648, FBGN0000606, FBGN0264089, FBGN0003716, FBGN0005631, FBGN0001085, FBGN0000490, FBGN0004657, FBGN0000117, FBGN0004647, FBGN0004644, FBGN0000499, FBGN0260642, FBGN0004009, FBGN0003391, FBGN0003205, FBGN0003256, FBGN0003117, FBGN0003371, FBGN0002643	111	109	10386	18.0268	9.02338e-17	1.25325e-18	1.3417e-16
GOTERM_BP_4	GO:0072359~circulatory system development	21	18.9189	1.01978e-19	FBGN0026597, FBGN0011648, FBGN0000606, FBGN0264089, FBGN0003716, FBGN0005631, FBGN0001085, FBGN0000490, FBGN0004657, FBGN0000117, FBGN0004647, FBGN0004644, FBGN0000499, FBGN0260642, FBGN0004009, FBGN0003391, FBGN0003205, FBGN0003256, FBGN0003117, FBGN0003371, FBGN0002643	111	110	10386	17.8629	1.0932e-16	1.4773e-18	1.62549e-16
GOTERM_BP_4	GO:0072358~cardiovascular system development	21	18.9189	1.01978e-19	FBGN0026597, FBGN0011648, FBGN0000606, FBGN0264089, FBGN0003716, FBGN0005631, FBGN0001085, FBGN0000490, FBGN0004657, FBGN0000117, FBGN0004647, FBGN0004644, FBGN0000499, FBGN0260642, FBGN0004009, FBGN0003391, FBGN0003205, FBGN0003256, FBGN0003117, FBGN0003371, FBGN0002643	111	110	10386	17.8629	1.0932e-16	1.4773e-18	1.62549e-16
GOTERM_BP_4	GO:0003007~heart morphogenesis	9	8.10811	1.76828e-09	FBGN0004644, FBGN0000499, FBGN0003391, FBGN0004009, FBGN0000606, FBGN0264089, FBGN0005631, FBGN0000117, FBGN0002643	111	34	10386	24.7679	1.89559e-06	1.25536e-08	2.81858e-06
Annotation Cluster 11	Enrichment Score: 16.39442057397337
Category	Term	Count	%	PValue	Genes	List Total	Pop Hits	Pop Total	Fold Enrichment	Bonferroni	Benjamini	FDR
GOTERM_BP_4	GO:0048732~gland development	31	27.9279	3.41354e-24	FBGN0003716, FBGN0000490, FBGN0004647, FBGN0003339, FBGN0000499, FBGN0004009, FBGN0003391, FBGN0016797, FBGN0003079, FBGN0002576, FBGN0003731, FBGN0002121, FBGN0027053, FBGN0022238, FBGN0000320, FBGN0014020, FBGN0011648, FBGN0264089, FBGN0005592, FBGN0005631, FBGN0001085, FBGN0004657, FBGN0011766, FBGN0010333, FBGN0003997, FBGN0004635, FBGN0000625, FBGN0260642, FBGN0011706, FBGN0003117, FBGN02654…	111	244	10386	11.8877	3.65931e-21	6.53448e-23	5.44107e-21
GOTERM_BP_4	GO:0007431~salivary gland development	23	20.7207	2.73004e-17	FBGN0011648, FBGN0264089, FBGN0003716, FBGN0005592, FBGN0005631, FBGN0001085, FBGN0000490, FBGN0004657, FBGN0010333, FBGN0003997, FBGN0004635, FBGN0000625, FBGN0000499, FBGN0003339, FBGN0003391, FBGN0011706, FBGN0016797, FBGN0003731, FBGN0002121, FBGN0022238, FBGN0000320, FBGN0265434, FBGN0014020	111	189	10386	11.3865	2.9266e-14	3.48405e-16	4.3516e-14
GOTERM_BP_4	GO:0035272~exocrine system development	23	20.7207	2.73004e-17	FBGN0011648, FBGN0264089, FBGN0003716, FBGN0005592, FBGN0005631, FBGN0001085, FBGN0000490, FBGN0004657, FBGN0010333, FBGN0003997, FBGN0004635, FBGN0000625, FBGN0000499, FBGN0003339, FBGN0003391, FBGN0011706, FBGN0016797, FBGN0003731, FBGN0002121, FBGN0022238, FBGN0000320, FBGN0265434, FBGN0014020	111	189	10386	11.3865	2.9266e-14	3.48405e-16	4.3516e-14
GOTERM_BP_4	GO:0022612~gland morphogenesis	15	13.5135	1.03938e-09	FBGN0005592, FBGN0001085, FBGN0010333, FBGN0003997, FBGN0004635, FBGN0000625, FBGN0000499, FBGN0003391, FBGN0011706, FBGN0016797, FBGN0002121, FBGN0022238, FBGN0014020, FBGN0265434, FBGN0000320	111	158	10386	8.883	1.11422e-06	7.52849e-09	1.65674e-06
Annotation Cluster 12	Enrichment Score: 14.356996751112492
Category	Term	Count	%	PValue	Genes	List Total	Pop Hits	Pop Total	Fold Enrichment	Bonferroni	Benjamini	FDR
GOTERM_BP_4	GO:0007548~sex differentiation	22	19.8198	8.88525e-22	FBGN0264089, FBGN0005631, FBGN0000490, FBGN0004657, FBGN0003997, FBGN0004647, FBGN0004644, FBGN0000499, FBGN0003339, FBGN0000635, FBGN0004009, FBGN0003391, FBGN0004198, FBGN0011706, FBGN0016797, FBGN0002576, FBGN0000097, FBGN0003731, FBGN0000229, FBGN0003892, FBGN0000320, FBGN0005677	111	103	10386	19.9853	9.52499e-19	1.5119e-20	1.41628e-18
GOTERM_BP_4	GO:0061458~reproductive system development	17	15.3153	2.26002e-16	FBGN0264089, FBGN0005631, FBGN0004657, FBGN0004647, FBGN0000499, FBGN0004644, FBGN0000635, FBGN0003391, FBGN0004198, FBGN0011706, FBGN0016797, FBGN0002576, FBGN0000097, FBGN0003731, FBGN0000229, FBGN0003892, FBGN0000320	111	83	10386	19.1644	2.38032e-13	2.55351e-15	3.55271e-13
GOTERM_BP_4	GO:0048608~reproductive structure development	17	15.3153	2.26002e-16	FBGN0264089, FBGN0005631, FBGN0004657, FBGN0004647, FBGN0000499, FBGN0004644, FBGN0000635, FBGN0003391, FBGN0004198, FBGN0011706, FBGN0016797, FBGN0002576, FBGN0000097, FBGN0003731, FBGN0000229, FBGN0003892, FBGN0000320	111	83	10386	19.1644	2.38032e-13	2.55351e-15	3.55271e-13
GOTERM_BP_4	GO:0045137~development of primary sexual characteristics	11	9.90991	1.90135e-10	FBGN0004644, FBGN0000499, FBGN0003391, FBGN0004198, FBGN0016797, FBGN0264089, FBGN0005631, FBGN0000097, FBGN0003731, FBGN0003892, FBGN0000320	111	54	10386	19.0601	2.03824e-07	1.48777e-09	3.03069e-07
GOTERM_BP_4	GO:0008406~gonad development	11	9.90991	1.90135e-10	FBGN0004644, FBGN0000499, FBGN0003391, FBGN0004198, FBGN0016797, FBGN0264089, FBGN0005631, FBGN0000097, FBGN0003731, FBGN0003892, FBGN0000320	111	54	10386	19.0601	2.03824e-07	1.48777e-09	3.03069e-07
Annotation Cluster 13	Enrichment Score: 13.812033756133573
Category	Term	Count	%	PValue	Genes	List Total	Pop Hits	Pop Total	Fold Enrichment	Bonferroni	Benjamini	FDR
GOTERM_BP_4	GO:0048645~organ formation	15	13.5135	2.82504e-16	FBGN0011648, FBGN0013718, FBGN0264089, FBGN0003716, FBGN0005631, FBGN0001085, FBGN0000490, FBGN0000117, FBGN0004635, FBGN0000499, FBGN0003339, FBGN0004644, FBGN0004009, FBGN0002576, FBGN0001169	111	55	10386	25.5184	3.57048e-13	3.77476e-15	5.32907e-13
GOTERM_BP_4	GO:0048859~formation of anatomical boundary	15	13.5135	3.73172e-16	FBGN0011648, FBGN0013718, FBGN0264089, FBGN0003716, FBGN0005631, FBGN0001085, FBGN0000490, FBGN0001075, FBGN0004647, FBGN0004635, FBGN0000497, FBGN0003339, FBGN0004198, FBGN0002576, FBGN0001169	111	56	10386	25.0627	3.57048e-13	3.77476e-15	5.32907e-13
GOTERM_BP_4	GO:0010160~formation of organ boundary	11	9.90991	3.47509e-11	FBGN0003339, FBGN0011648, FBGN0003716, FBGN0264089, FBGN0013718, FBGN0005631, FBGN0001085, FBGN0002576, FBGN0000490, FBGN0004635, FBGN0001169	111	46	10386	22.3749	3.72529e-08	2.84374e-10	5.53918e-08
Annotation Cluster 14	Enrichment Score: 12.266287249576903
Category	Term	Count	%	PValue	Genes	List Total	Pop Hits	Pop Total	Fold Enrichment	Bonferroni	Benjamini	FDR
GOTERM_BP_4	GO:0001736~establishment of planar polarity	23	20.7207	3.24692e-24	FBGN0003053, FBGN0262029, FBGN0001085, FBGN0010333, FBGN0001075, FBGN0004647, FBGN0011817, FBGN0000497, FBGN0000499, FBGN0014388, FBGN0004009, FBGN0003391, FBGN0263289, FBGN0000463, FBGN0001291, FBGN0026181, FBGN0261617, FBGN0000097, FBGN0003731, FBGN0010909, FBGN0000229, FBGN0265434, FBGN0014020	111	94	10386	22.8942	3.48069e-21	6.32853e-23	5.17548e-21
GOTERM_BP_4	GO:0007164~establishment of tissue polarity	23	20.7207	3.24692e-24	FBGN0003053, FBGN0262029, FBGN0001085, FBGN0010333, FBGN0001075, FBGN0004647, FBGN0011817, FBGN0000497, FBGN0000499, FBGN0014388, FBGN0004009, FBGN0003391, FBGN0263289, FBGN0000463, FBGN0001291, FBGN0026181, FBGN0261617, FBGN0000097, FBGN0003731, FBGN0010909, FBGN0000229, FBGN0265434, FBGN0014020	111	94	10386	22.8942	3.48069e-21	6.32853e-23	5.17548e-21
GOTERM_BP_4	GO:0042067~establishment of ommatidial planar polarity	20	18.018	1.70314e-23	FBGN0003053, FBGN0262029, FBGN0001085, FBGN0001075, FBGN0010333, FBGN0004647, FBGN0011817, FBGN0000497, FBGN0000499, FBGN0014388, FBGN0004009, FBGN0003391, FBGN0263289, FBGN0000463, FBGN0001291, FBGN0026181, FBGN0261617, FBGN0000097, FBGN0003731, FBGN0014020	111	62	10386	30.1831	1.82576e-20	3.14786e-22	2.71475e-20
GOTERM_BP_4	GO:0016318~ommatidial rotation	13	11.7117	4.75262e-17	FBGN0000499, FBGN0014388, FBGN0003391, FBGN0004009, FBGN0003053, FBGN0000463, FBGN0026181, FBGN0001085, FBGN0003731, FBGN0001075, FBGN0011817, FBGN0000497, FBGN0014020	111	29	10386	41.9441	5.0948e-14	5.92419e-16	7.57552e-14
GOTERM_BP_4	GO:0008544~epidermis development	14	12.6126	1.97305e-13	FBGN0001085, FBGN0001075, FBGN0010333, FBGN0004647, FBGN0000497, FBGN0004644, FBGN0000499, FBGN0004009, FBGN0011715, FBGN0263289, FBGN0026181, FBGN0002121, FBGN0014020, FBGN0265434	111	68	10386	19.2639	2.11491e-10	1.90536e-12	3.14471e-10
GOTERM_BP_4	GO:0001737~establishment of imaginal disc-derived wing hair orientation	9	8.10811	3.19061e-10	FBGN0000499, FBGN0263289, FBGN0026181, FBGN0001085, FBGN0010333, FBGN0001075, FBGN0004647, FBGN0000497, FBGN0014020	111	28	10386	30.0753	3.42033e-07	2.39184e-09	5.08573e-07
GOTERM_BP_4	GO:0035316~non-sensory hair organization	10	9.00901	2.5281e-09	FBGN0000499, FBGN0263289, FBGN0026181, FBGN0001085, FBGN0010333, FBGN0001075, FBGN0004647, FBGN0000497, FBGN0014020, FBGN0265434	111	51	10386	18.3466	2.71012e-06	1.75982e-08	4.02972e-06
GOTERM_BP_4	GO:0061245~establishment or maintenance of bipolar cell polarity	9	8.10811	7.10609e-09	FBGN0000499, FBGN0263289, FBGN0001085, FBGN0003731, FBGN0003205, FBGN0002121, FBGN0001075, FBGN0000497, FBGN0014020	111	40	10386	21.0527	7.6177e-06	4.67345e-08	1.13269e-05
GOTERM_BP_4	GO:0030010~establishment of cell polarity	10	9.00901	9.73228e-09	FBGN0000499, FBGN0260003, FBGN0263289, FBGN0001085, FBGN0002121, FBGN0010333, FBGN0001075, FBGN0003371, FBGN0000497, FBGN0265434	111	59	10386	15.8589	1.0433e-05	6.28494e-08	1.5513e-05
GOTERM_BP_4	GO:0035151~regulation of tube size, open tracheal system	9	8.10811	5.34292e-08	FBGN0000499, FBGN0000635, FBGN0259749, FBGN0001085, FBGN0000490, FBGN0001075, FBGN0000497, FBGN0014020, FBGN0265434	111	51	10386	16.5119	5.72745e-05	3.19978e-07	8.51645e-05
GOTERM_BP_4	GO:0035150~regulation of tube size	9	8.10811	9.86436e-08	FBGN0000499, FBGN0000635, FBGN0259749, FBGN0001085, FBGN0000490, FBGN0001075, FBGN0000497, FBGN0014020, FBGN0265434	111	55	10386	15.3111	0.00010574	5.62478e-07	0.000157235
GOTERM_BP_4	GO:0061339~establishment or maintenance of monopolar cell polarity	6	5.40541	4.84158e-07	FBGN0000499, FBGN0263289, FBGN0001085, FBGN0010333, FBGN0001075, FBGN0000497	111	16	10386	35.0878	0.000518883	2.56939e-06	0.000771731
GOTERM_BP_4	GO:0016335~morphogenesis of larval imaginal disc epithelium	5	4.5045	1.44097e-06	FBGN0004644, FBGN0263289, FBGN0002121, FBGN0010333, FBGN0001075	111	9	10386	51.982	0.00154353	7.18472e-06	0.00229684
Annotation Cluster 15	Enrichment Score: 11.912902335308614
Category	Term	Count	%	PValue	Genes	List Total	Pop Hits	Pop Total	Fold Enrichment	Bonferroni	Benjamini	FDR
GOTERM_BP_4	GO:0045597~positive regulation of cell differentiation	18	16.2162	9.25588e-17	FBGN0003053, FBGN0001085, FBGN0025641, FBGN0011766, FBGN0013733, FBGN0010333, FBGN0003041, FBGN0004647, FBGN0011763, FBGN0000499, FBGN0004009, FBGN0001291, FBGN0003079, FBGN0002576, FBGN0000097, FBGN0003205, FBGN0000229, FBGN0003256	111	95	10386	17.7286	1.19016e-13	1.33227e-15	1.77636e-13
GOTERM_BP_4	GO:0010720~positive regulation of cell development	16	14.4144	1.77336e-14	FBGN0003053, FBGN0001085, FBGN0025641, FBGN0011766, FBGN0013733, FBGN0010333, FBGN0003041, FBGN0011763, FBGN0000499, FBGN0004009, FBGN0003079, FBGN0003205, FBGN0000097, FBGN0002576, FBGN0000229, FBGN0003256	111	89	10386	16.8211	1.90425e-11	1.8141e-13	2.83107e-11
GOTERM_BP_4	GO:0051962~positive regulation of nervous system development	14	12.6126	3.38047e-11	FBGN0011648, FBGN0003716, FBGN0001085, FBGN0013733, FBGN0010333, FBGN0003041, FBGN0011817, FBGN0000499, FBGN0003079, FBGN0003205, FBGN0000097, FBGN0000229, FBGN0003256, FBGN0010415	111	100	10386	13.0995	3.62386e-08	2.78758e-10	5.38835e-08
GOTERM_BP_4	GO:0050769~positive regulation of neurogenesis	10	9.00901	4.01975e-08	FBGN0000499, FBGN0003079, FBGN0001085, FBGN0000097, FBGN0003205, FBGN0000229, FBGN0010333, FBGN0013733, FBGN0003256, FBGN0003041	111	69	10386	13.5605	4.30908e-05	2.4484e-07	6.40736e-05
Annotation Cluster 16	Enrichment Score: 11.12695709643204
Category	Term	Count	%	PValue	Genes	List Total	Pop Hits	Pop Total	Fold Enrichment	Bonferroni	Benjamini	FDR
GOTERM_BP_4	GO:0016331~morphogenesis of embryonic epithelium	24	21.6216	2.20923e-22	FBGN0011648, FBGN0003053, FBGN0003716, FBGN0000490, FBGN0004657, FBGN0000117, FBGN0010333, FBGN0004647, FBGN0000499, FBGN0004009, FBGN0263289, FBGN0001291, FBGN0259749, FBGN0026181, FBGN0000097, FBGN0003205, FBGN0003731, FBGN0010909, FBGN0002121, FBGN0023172, FBGN0000229, FBGN0003117, FBGN0265434, FBGN0014020	111	129	10386	17.4079	2.36829e-19	3.88245e-21	3.52144e-19
GOTERM_BP_4	GO:0055123~digestive system development	19	17.1171	9.44412e-17	FBGN0011648, FBGN0264089, FBGN0000490, FBGN0004657, FBGN0010333, FBGN0003041, FBGN0004647, FBGN0004635, FBGN0004644, FBGN0260642, FBGN0003339, FBGN0004009, FBGN0003391, FBGN0004198, FBGN0003731, FBGN0000229, FBGN0003117, FBGN0265434, FBGN0014020	111	113	10386	15.7326	1.19016e-13	1.33227e-15	1.77636e-13
GOTERM_BP_4	GO:0048565~digestive tract development	19	17.1171	9.44412e-17	FBGN0011648, FBGN0264089, FBGN0000490, FBGN0004657, FBGN0010333, FBGN0003041, FBGN0004647, FBGN0004635, FBGN0004644, FBGN0260642, FBGN0003339, FBGN0004009, FBGN0003391, FBGN0004198, FBGN0003731, FBGN0000229, FBGN0003117, FBGN0265434, FBGN0014020	111	113	10386	15.7326	1.19016e-13	1.33227e-15	1.77636e-13
GOTERM_BP_4	GO:0001655~urogenital system development	14	12.6126	1.50788e-12	FBGN0011648, FBGN0003716, FBGN0000490, FBGN0003041, FBGN0004647, FBGN0004635, FBGN0004198, FBGN0004009, FBGN0263289, FBGN0003731, FBGN0003205, FBGN0003117, FBGN0014020, FBGN0265434	111	79	10386	16.5816	1.61647e-09	1.39351e-11	2.40356e-09
GOTERM_BP_4	GO:0072001~renal system development	14	12.6126	1.50788e-12	FBGN0011648, FBGN0003716, FBGN0000490, FBGN0003041, FBGN0004647, FBGN0004635, FBGN0004198, FBGN0004009, FBGN0263289, FBGN0003731, FBGN0003205, FBGN0003117, FBGN0014020, FBGN0265434	111	79	10386	16.5816	1.61647e-09	1.39351e-11	2.40356e-09
GOTERM_BP_4	GO:0061326~renal tubule development	13	11.7117	6.88638e-12	FBGN0011648, FBGN0003716, FBGN0000490, FBGN0003041, FBGN0004647, FBGN0004635, FBGN0004198, FBGN0004009, FBGN0263289, FBGN0003731, FBGN0003205, FBGN0014020, FBGN0265434	111	70	10386	17.3768	7.3822e-09	5.95338e-11	1.09767e-08
GOTERM_BP_4	GO:0072002~Malpighian tubule development	13	11.7117	6.88638e-12	FBGN0011648, FBGN0003716, FBGN0000490, FBGN0003041, FBGN0004647, FBGN0004635, FBGN0004198, FBGN0004009, FBGN0263289, FBGN0003731, FBGN0003205, FBGN0014020, FBGN0265434	111	70	10386	17.3768	7.3822e-09	5.95338e-11	1.09767e-08
GOTERM_BP_4	GO:0048546~digestive tract morphogenesis	13	11.7117	9.77128e-12	FBGN0011648, FBGN0000490, FBGN0010333, FBGN0004647, FBGN0003041, FBGN0004635, FBGN0004644, FBGN0004198, FBGN0004009, FBGN0003731, FBGN0000229, FBGN0265434, FBGN0014020	111	72	10386	16.8941	1.04748e-08	8.31336e-11	1.55751e-08
GOTERM_BP_4	GO:0061525~hindgut development	11	9.90991	6.73649e-10	FBGN0004644, FBGN0011648, FBGN0004009, FBGN0004198, FBGN0000490, FBGN0003731, FBGN0004647, FBGN0003041, FBGN0004635, FBGN0014020, FBGN0265434	111	61	10386	16.8728	7.22152e-07	4.98036e-09	1.07378e-06
GOTERM_BP_4	GO:0007442~hindgut morphogenesis	11	9.90991	6.73649e-10	FBGN0004644, FBGN0011648, FBGN0004009, FBGN0004198, FBGN0000490, FBGN0003731, FBGN0004647, FBGN0003041, FBGN0004635, FBGN0014020, FBGN0265434	111	61	10386	16.8728	7.22152e-07	4.98036e-09	1.07378e-06
GOTERM_BP_4	GO:0007443~Malpighian tubule morphogenesis	10	9.00901	1.73751e-09	FBGN0011648, FBGN0004009, FBGN0004198, FBGN0000490, FBGN0003731, FBGN0004647, FBGN0003041, FBGN0004635, FBGN0014020, FBGN0265434	111	49	10386	19.0954	1.86261e-06	1.24174e-08	2.76954e-06
GOTERM_BP_4	GO:0035277~spiracle morphogenesis, open tracheal system	8	7.20721	2.62883e-09	FBGN0004644, FBGN0004009, FBGN0004198, FBGN0035574, FBGN0003731, FBGN0023172, FBGN0014020, FBGN0265434	111	23	10386	32.5452	2.8181e-06	1.81813e-08	4.19028e-06
GOTERM_BP_4	GO:0007422~peripheral nervous system development	12	10.8108	3.7531e-09	FBGN0004198, FBGN0086680, FBGN0000463, FBGN0003731, FBGN0003205, FBGN0003892, FBGN0010382, FBGN0010333, FBGN0004647, FBGN0003041, FBGN0004635, FBGN0014020	111	94	10386	11.9448	4.02332e-06	2.54641e-08	5.98233e-06
GOTERM_BP_4	GO:0048619~embryonic hindgut morphogenesis	10	9.00901	4.30401e-09	FBGN0011648, FBGN0004009, FBGN0004198, FBGN0000490, FBGN0003731, FBGN0004647, FBGN0003041, FBGN0004635, FBGN0014020, FBGN0265434	111	54	10386	17.3273	4.61388e-06	2.90182e-08	6.86045e-06
GOTERM_BP_4	GO:2001013~epithelial cell proliferation involved in renal tubule morphogenesis	4	3.6036	0.000179305	FBGN0004009, FBGN0003731, FBGN0004647, FBGN0004635	111	11	10386	34.0246	0.174885	0.000647036	0.285424
Annotation Cluster 17	Enrichment Score: 10.759085526477454
Category	Term	Count	%	PValue	Genes	List Total	Pop Hits	Pop Total	Fold Enrichment	Bonferroni	Benjamini	FDR
GOTERM_BP_4	GO:0045596~negative regulation of cell differentiation	20	18.018	1.63025e-17	FBGN0002783, FBGN0250876, FBGN0000606, FBGN0261885, FBGN0005592, FBGN0000117, FBGN0004647, FBGN0011260, FBGN0000499, FBGN0000635, FBGN0014388, FBGN0004009, FBGN0000463, FBGN0000097, FBGN0003731, FBGN0003205, FBGN0002121, FBGN0027053, FBGN0000212, FBGN0000320	111	121	10386	15.4657	1.74763e-14	2.13126e-16	2.59857e-14
GOTERM_BP_4	GO:0010721~negative regulation of cell development	13	11.7117	4.82648e-11	FBGN0002783, FBGN0000635, FBGN0250876, FBGN0000463, FBGN0261885, FBGN0005592, FBGN0000097, FBGN0003731, FBGN0003205, FBGN0002121, FBGN0004647, FBGN0011260, FBGN0000212	111	82	10386	14.8339	5.17399e-08	3.91969e-10	7.69327e-08
GOTERM_BP_4	GO:0050768~negative regulation of neurogenesis	11	9.90991	3.63586e-09	FBGN0002783, FBGN0000635, FBGN0250876, FBGN0000463, FBGN0261885, FBGN0005592, FBGN0000097, FBGN0002121, FBGN0004647, FBGN0011260, FBGN0000212	111	72	10386	14.295	3.89763e-06	2.48257e-08	5.79544e-06
GOTERM_BP_4	GO:0051961~negative regulation of nervous system development	12	10.8108	3.21489e-08	FBGN0002783, FBGN0000635, FBGN0250876, FBGN0000463, FBGN0261885, FBGN0005592, FBGN0000097, FBGN0002121, FBGN0004647, FBGN0011260, FBGN0000212, FBGN0003371	111	115	10386	9.76357	3.4463e-05	1.99212e-07	5.12443e-05
Annotation Cluster 18	Enrichment Score: 10.331823459346072
Category	Term	Count	%	PValue	Genes	List Total	Pop Hits	Pop Total	Fold Enrichment	Bonferroni	Benjamini	FDR
GOTERM_BP_4	GO:0010604~positive regulation of macromolecule metabolic process	38	34.2342	9.30415e-19	FBGN0026160, FBGN0002783, FBGN0086680, FBGN0000490, FBGN0000117, FBGN0004647, FBGN0005561, FBGN0261239, FBGN0003339, FBGN0011715, FBGN0001291, FBGN0261617, FBGN0003079, FBGN0002576, FBGN0013263, FBGN0033636, FBGN0003256, FBGN0027053, FBGN0022238, FBGN0002643, FBGN0003371, FBGN0000320, FBGN0014020, FBGN0003567, FBGN0011648, FBGN0261885, FBGN0000606, FBGN0005592, FBGN0011766, FBGN0010333, FBGN00039…	111	626	10386	5.67982	9.97405e-16	1.31238e-17	1.48305e-15
GOTERM_BP_4	GO:0031325~positive regulation of cellular metabolic process	38	34.2342	2.1577e-18	FBGN0026160, FBGN0002783, FBGN0086680, FBGN0000490, FBGN0000117, FBGN0004647, FBGN0005561, FBGN0034789, FBGN0261239, FBGN0003339, FBGN0011715, FBGN0001291, FBGN0261617, FBGN0003079, FBGN0002576, FBGN0013263, FBGN0033636, FBGN0003256, FBGN0027053, FBGN0022238, FBGN0002643, FBGN0003371, FBGN0000320, FBGN0014020, FBGN0003567, FBGN0011648, FBGN0261885, FBGN0000606, FBGN0005592, FBGN0011766, FBGN00103…	111	642	10386	5.53827	2.31305e-15	2.96545e-17	3.43931e-15
GOTERM_BP_4	GO:0031326~regulation of cellular biosynthetic process	51	45.9459	9.49443e-17	FBGN0003716, FBGN0001233, FBGN0004861, FBGN0034789, FBGN0261239, FBGN0003339, FBGN0004009, FBGN0263289, FBGN0261617, FBGN0053554, FBGN0010382, FBGN0003751, FBGN0003567, FBGN0261885, FBGN0011766, FBGN0011763, FBGN0000625, FBGN0260642, FBGN0014388, FBGN0002783, FBGN0026160, FBGN0003415, FBGN0086680, FBGN0003042, FBGN0002781, FBGN0000490, FBGN0000117, FBGN0004647, FBGN0005561, FBGN0004644, FBGN00117…	111	1376	10386	3.46798	1.19016e-13	1.33227e-15	1.77636e-13
GOTERM_BP_4	GO:0010556~regulation of macromolecule biosynthetic process	50	45.045	9.95229e-17	FBGN0003716, FBGN0001233, FBGN0004861, FBGN0261239, FBGN0003339, FBGN0004009, FBGN0263289, FBGN0261617, FBGN0053554, FBGN0010382, FBGN0003751, FBGN0003567, FBGN0261885, FBGN0011766, FBGN0000625, FBGN0011763, FBGN0260642, FBGN0014388, FBGN0026160, FBGN0002783, FBGN0003415, FBGN0086680, FBGN0003042, FBGN0002781, FBGN0000490, FBGN0000117, FBGN0004647, FBGN0005561, FBGN0004644, FBGN0011715, FBGN00012…	111	1321	10386	3.54154	1.19016e-13	1.33227e-15	1.77636e-13
GOTERM_BP_4	GO:0051252~regulation of RNA metabolic process	48	43.2432	1.97078e-16	FBGN0003415, FBGN0002783, FBGN0026160, FBGN0086680, FBGN0003042, FBGN0003716, FBGN0002781, FBGN0000490, FBGN0000117, FBGN0004647, FBGN0001233, FBGN0004861, FBGN0005561, FBGN0261239, FBGN0003339, FBGN0004644, FBGN0004009, FBGN0263289, FBGN0011715, FBGN0001291, FBGN0261617, FBGN0003079, FBGN0002576, FBGN0013263, FBGN0033636, FBGN0053554, FBGN0003256, FBGN0022238, FBGN0002643, FBGN0000320, FBGN00035…	111	1232	10386	3.64549	2.38032e-13	2.66454e-15	3.55271e-13
GOTERM_BP_4	GO:0019219~regulation of nucleobase-containing compound metabolic process	49	44.1441	2.22275e-16	FBGN0003716, FBGN0001233, FBGN0004861, FBGN0003339, FBGN0261239, FBGN0004009, FBGN0263289, FBGN0261617, FBGN0053554, FBGN0010382, FBGN0003751, FBGN0003567, FBGN0261885, FBGN0011766, FBGN0000625, FBGN0011763, FBGN0260642, FBGN0014388, FBGN0026160, FBGN0002783, FBGN0003415, FBGN0086680, FBGN0003042, FBGN0002781, FBGN0000490, FBGN0000117, FBGN0004647, FBGN0005561, FBGN0004644, FBGN0011715, FBGN00012…	111	1291	10386	3.55136	2.38032e-13	2.55351e-15	3.55271e-13
UP_KEYWORDS	Nucleus	40	36.036	5.94434e-16	FBGN0003415, FBGN0002783, FBGN0086680, FBGN0262955, FBGN0003042, FBGN0002781, FBGN0004647, FBGN0004861, FBGN0005561, FBGN0261239, FBGN0000499, FBGN0003339, FBGN0004644, FBGN0001291, FBGN0002576, FBGN0013263, FBGN0010382, FBGN0053554, FBGN0003256, FBGN0022238, FBGN0027053, FBGN0002643, FBGN0003371, FBGN0000320, FBGN0003567, FBGN0003053, FBGN0011648, FBGN0261885, FBGN0000606, FBGN0036285, FBGN00117…	111	1134	13921	4.42379	6.93889e-14	2.30926e-14	6.43929e-13
GOTERM_BP_4	GO:0034654~nucleobase-containing compound biosynthetic process	51	45.9459	7.72812e-16	FBGN0262955, FBGN0003716, FBGN0001233, FBGN0004861, FBGN0261239, FBGN0003339, FBGN0004009, FBGN0263289, FBGN0261617, FBGN0053554, FBGN0010382, FBGN0003751, FBGN0003567, FBGN0261885, FBGN0011766, FBGN0011763, FBGN0000625, FBGN0260642, FBGN0014388, FBGN0259749, FBGN0002783, FBGN0026160, FBGN0003415, FBGN0086680, FBGN0003042, FBGN0002781, FBGN0000490, FBGN0000117, FBGN0004647, FBGN0005561, FBGN00046…	111	1442	10386	3.30926	8.33111e-13	8.54872e-15	1.24345e-12
GOTERM_BP_4	GO:0010468~regulation of gene expression	51	45.9459	1.29327e-15	FBGN0003716, FBGN0001075, FBGN0001233, FBGN0004861, FBGN0261239, FBGN0003339, FBGN0004009, FBGN0263289, FBGN0261617, FBGN0053554, FBGN0003751, FBGN0003567, FBGN0261885, FBGN0011766, FBGN0011763, FBGN0000625, FBGN0260642, FBGN0014388, FBGN0002783, FBGN0026160, FBGN0003415, FBGN0086680, FBGN0003042, FBGN0002781, FBGN0000490, FBGN0000117, FBGN0004647, FBGN0005561, FBGN0004644, FBGN0011715, FBGN00012…	111	1459	10386	3.2707	1.42819e-12	1.44329e-14	2.12053e-12
GOTERM_BP_4	GO:0018130~heterocycle biosynthetic process	51	45.9459	4.69247e-15	FBGN0262955, FBGN0003716, FBGN0001233, FBGN0004861, FBGN0261239, FBGN0003339, FBGN0004009, FBGN0263289, FBGN0261617, FBGN0053554, FBGN0010382, FBGN0003751, FBGN0003567, FBGN0261885, FBGN0011766, FBGN0011763, FBGN0000625, FBGN0260642, FBGN0014388, FBGN0259749, FBGN0002783, FBGN0026160, FBGN0003415, FBGN0086680, FBGN0003042, FBGN0002781, FBGN0000490, FBGN0000117, FBGN0004647, FBGN0005561, FBGN00046…	111	1505	10386	3.17073	4.99867e-12	4.85167e-14	7.42739e-12
GOTERM_BP_4	GO:0019438~aromatic compound biosynthetic process	51	45.9459	5.95621e-15	FBGN0262955, FBGN0003716, FBGN0001233, FBGN0004861, FBGN0261239, FBGN0003339, FBGN0004009, FBGN0263289, FBGN0261617, FBGN0053554, FBGN0010382, FBGN0003751, FBGN0003567, FBGN0261885, FBGN0011766, FBGN0011763, FBGN0000625, FBGN0260642, FBGN0014388, FBGN0259749, FBGN0002783, FBGN0026160, FBGN0003415, FBGN0086680, FBGN0003042, FBGN0002781, FBGN0000490, FBGN0000117, FBGN0004647, FBGN0005561, FBGN00046…	111	1514	10386	3.15188	6.42686e-12	6.18394e-14	9.55902e-12
GOTERM_BP_4	GO:1901362~organic cyclic compound biosynthetic process	51	45.9459	1.82922e-14	FBGN0262955, FBGN0003716, FBGN0001233, FBGN0004861, FBGN0261239, FBGN0003339, FBGN0004009, FBGN0263289, FBGN0261617, FBGN0053554, FBGN0010382, FBGN0003751, FBGN0003567, FBGN0261885, FBGN0011766, FBGN0011763, FBGN0000625, FBGN0260642, FBGN0014388, FBGN0259749, FBGN0002783, FBGN0026160, FBGN0003415, FBGN0086680, FBGN0003042, FBGN0002781, FBGN0000490, FBGN0000117, FBGN0004647, FBGN0005561, FBGN00046…	111	1556	10386	3.0668	1.96376e-11	1.85296e-13	2.91989e-11
UP_KEYWORDS	Transcription	25	22.5225	5.05462e-14	FBGN0003415, FBGN0086680, FBGN0003567, FBGN0011648, FBGN0262955, FBGN0261885, FBGN0000606, FBGN0002781, FBGN0036285, FBGN0011766, FBGN0004647, FBGN0005561, FBGN0011763, FBGN0000625, FBGN0261239, FBGN0004198, FBGN0001291, FBGN0002576, FBGN0000097, FBGN0013263, FBGN0053554, FBGN0022238, FBGN0003117, FBGN0000212, FBGN0000320	111	442	13921	7.09358	6.31439e-12	1.57863e-12	5.84199e-11
UP_KEYWORDS	Transcription regulation	24	21.6216	1.25664e-13	FBGN0003415, FBGN0011648, FBGN0003567, FBGN0086680, FBGN0000606, FBGN0261885, FBGN0002781, FBGN0036285, FBGN0011766, FBGN0004647, FBGN0005561, FBGN0011763, FBGN0000625, FBGN0261239, FBGN0004198, FBGN0001291, FBGN0002576, FBGN0000097, FBGN0013263, FBGN0053554, FBGN0022238, FBGN0003117, FBGN0000212, FBGN0000320	111	416	13921	7.23545	1.57097e-11	3.14193e-12	1.45339e-10
GOTERM_BP_4	GO:0051254~positive regulation of RNA metabolic process	25	22.5225	5.03703e-13	FBGN0026160, FBGN0002783, FBGN0086680, FBGN0000117, FBGN0004647, FBGN0005561, FBGN0261239, FBGN0003339, FBGN0011715, FBGN0001291, FBGN0261617, FBGN0002576, FBGN0013263, FBGN0033636, FBGN0022238, FBGN0002643, FBGN0000320, FBGN0011648, FBGN0003567, FBGN0000606, FBGN0261885, FBGN0011766, FBGN0260642, FBGN0003117, FBGN0000212	111	369	10386	6.33927	5.39975e-10	4.82125e-12	8.02891e-10
GOTERM_BP_4	GO:0010628~positive regulation of gene expression	26	23.4234	7.63858e-13	FBGN0026160, FBGN0002783, FBGN0086680, FBGN0000117, FBGN0004647, FBGN0005561, FBGN0261239, FBGN0003339, FBGN0011715, FBGN0001291, FBGN0261617, FBGN0002576, FBGN0013263, FBGN0033636, FBGN0022238, FBGN0002643, FBGN0000320, FBGN0011648, FBGN0003567, FBGN0000606, FBGN0261885, FBGN0011766, FBGN0011763, FBGN0260642, FBGN0003117, FBGN0000212	111	413	10386	5.89045	8.18829e-10	7.24631e-12	1.21753e-09
GOTERM_BP_4	GO:0045935~positive regulation of nucleobase-containing compound metabolic process	25	22.5225	2.58103e-12	FBGN0026160, FBGN0002783, FBGN0086680, FBGN0000117, FBGN0004647, FBGN0005561, FBGN0261239, FBGN0003339, FBGN0011715, FBGN0001291, FBGN0261617, FBGN0002576, FBGN0013263, FBGN0033636, FBGN0022238, FBGN0002643, FBGN0000320, FBGN0011648, FBGN0003567, FBGN0000606, FBGN0261885, FBGN0011766, FBGN0260642, FBGN0003117, FBGN0000212	111	398	10386	5.87736	2.76688e-09	2.34481e-11	4.11411e-09
GOTERM_BP_4	GO:0010557~positive regulation of macromolecule biosynthetic process	25	22.5225	2.58103e-12	FBGN0026160, FBGN0002783, FBGN0086680, FBGN0000117, FBGN0004647, FBGN0005561, FBGN0261239, FBGN0003339, FBGN0011715, FBGN0001291, FBGN0261617, FBGN0002576, FBGN0013263, FBGN0033636, FBGN0022238, FBGN0002643, FBGN0000320, FBGN0011648, FBGN0003567, FBGN0000606, FBGN0261885, FBGN0011766, FBGN0260642, FBGN0003117, FBGN0000212	111	398	10386	5.87736	2.76688e-09	2.34481e-11	4.11411e-09
GOTERM_BP_4	GO:0009891~positive regulation of biosynthetic process	26	23.4234	3.81592e-12	FBGN0026160, FBGN0002783, FBGN0086680, FBGN0000117, FBGN0004647, FBGN0005561, FBGN0034789, FBGN0261239, FBGN0003339, FBGN0011715, FBGN0001291, FBGN0261617, FBGN0002576, FBGN0013263, FBGN0033636, FBGN0022238, FBGN0002643, FBGN0000320, FBGN0011648, FBGN0003567, FBGN0000606, FBGN0261885, FBGN0011766, FBGN0260642, FBGN0003117, FBGN0000212	111	444	10386	5.47918	4.0907e-09	3.43756e-11	6.0825e-09
GOTERM_BP_4	GO:0031328~positive regulation of cellular biosynthetic process	26	23.4234	3.81592e-12	FBGN0026160, FBGN0002783, FBGN0086680, FBGN0000117, FBGN0004647, FBGN0005561, FBGN0034789, FBGN0261239, FBGN0003339, FBGN0011715, FBGN0001291, FBGN0261617, FBGN0002576, FBGN0013263, FBGN0033636, FBGN0022238, FBGN0002643, FBGN0000320, FBGN0011648, FBGN0003567, FBGN0000606, FBGN0261885, FBGN0011766, FBGN0260642, FBGN0003117, FBGN0000212	111	444	10386	5.47918	4.0907e-09	3.43756e-11	6.0825e-09
UP_KEYWORDS	Activator	14	12.6126	8.82096e-12	FBGN0003415, FBGN0086680, FBGN0261885, FBGN0011766, FBGN0004647, FBGN0011763, FBGN0261239, FBGN0001291, FBGN0013263, FBGN0053554, FBGN0022238, FBGN0003117, FBGN0000212, FBGN0000320	111	119	13921	14.7546	1.10262e-09	1.57517e-10	1.02006e-08
GOTERM_BP_4	GO:0051173~positive regulation of nitrogen compound metabolic process	25	22.5225	3.32037e-11	FBGN0026160, FBGN0002783, FBGN0086680, FBGN0000117, FBGN0004647, FBGN0005561, FBGN0261239, FBGN0003339, FBGN0011715, FBGN0001291, FBGN0261617, FBGN0002576, FBGN0013263, FBGN0033636, FBGN0022238, FBGN0002643, FBGN0000320, FBGN0011648, FBGN0003567, FBGN0000606, FBGN0261885, FBGN0011766, FBGN0260642, FBGN0003117, FBGN0000212	111	449	10386	5.20978	3.55943e-08	2.78081e-10	5.29256e-08
GOTERM_BP_4	GO:0010605~negative regulation of macromolecule metabolic process	31	27.9279	3.34262e-11	FBGN0003042, FBGN0003716, FBGN0000490, FBGN0001075, FBGN0004647, FBGN0004861, FBGN0004644, FBGN0004009, FBGN0263289, FBGN0001291, FBGN0002576, FBGN0013263, FBGN0002121, FBGN0000229, FBGN0010382, FBGN0027053, FBGN0022238, FBGN0003371, FBGN0003567, FBGN0003053, FBGN0011648, FBGN0000606, FBGN0036285, FBGN0011766, FBGN0004635, FBGN0000625, FBGN0004198, FBGN0000097, FBGN0003117, FBGN0005677, FBGN00104…	111	716	10386	4.05111	3.58328e-08	2.77774e-10	5.32803e-08
GOTERM_BP_4	GO:0016070~RNA metabolic process	50	45.045	2.14361e-10	FBGN0262955, FBGN0003716, FBGN0001233, FBGN0004861, FBGN0261239, FBGN0003339, FBGN0004009, FBGN0263289, FBGN0261617, FBGN0053554, FBGN0003751, FBGN0003567, FBGN0261885, FBGN0011766, FBGN0011763, FBGN0000625, FBGN0260642, FBGN0014388, FBGN0002783, FBGN0026160, FBGN0003415, FBGN0086680, FBGN0003042, FBGN0002781, FBGN0000490, FBGN0000117, FBGN0004647, FBGN0005561, FBGN0004644, FBGN0002069, FBGN00117…	111	1912	10386	2.44685	2.29795e-07	1.64139e-09	3.41684e-07
UP_KEYWORDS	DNA-binding	22	19.8198	9.97751e-10	FBGN0011648, FBGN0003567, FBGN0086680, FBGN0000606, FBGN0261885, FBGN0036285, FBGN0011766, FBGN0005561, FBGN0004861, FBGN0011763, FBGN0000625, FBGN0261239, FBGN0260642, FBGN0003339, FBGN0004198, FBGN0001291, FBGN0002576, FBGN0000097, FBGN0013263, FBGN0022238, FBGN0003117, FBGN0001169	111	535	13921	5.15723	1.24719e-07	1.38577e-08	1.15381e-06
GOTERM_BP_4	GO:0090304~nucleic acid metabolic process	51	45.9459	2.7687e-09	FBGN0262955, FBGN0003716, FBGN0001233, FBGN0004861, FBGN0261239, FBGN0003339, FBGN0004009, FBGN0263289, FBGN0261617, FBGN0053554, FBGN0010382, FBGN0003751, FBGN0003567, FBGN0261885, FBGN0011766, FBGN0011763, FBGN0000625, FBGN0260642, FBGN0014388, FBGN0002783, FBGN0026160, FBGN0003415, FBGN0086680, FBGN0003042, FBGN0002781, FBGN0000490, FBGN0000117, FBGN0004647, FBGN0005561, FBGN0004644, FBGN00020…	111	2126	10386	2.24457	2.96804e-06	1.90259e-08	4.41322e-06
GOTERM_BP_4	GO:0009059~macromolecule biosynthetic process	54	48.6486	5.03861e-09	FBGN0262955, FBGN0003716, FBGN0001233, FBGN0004861, FBGN0261239, FBGN0003339, FBGN0004009, FBGN0263289, FBGN0261617, FBGN0010382, FBGN0053554, FBGN0003567, FBGN0003751, FBGN0261885, FBGN0011766, FBGN0011763, FBGN0000625, FBGN0260642, FBGN0014388, FBGN0259749, FBGN0002783, FBGN0026160, FBGN0003415, FBGN0086680, FBGN0003042, FBGN0002781, FBGN0000490, FBGN0000117, FBGN0004647, FBGN0005561, FBGN00046…	111	2384	10386	2.1194	5.40138e-06	3.3549e-08	8.03139e-06
GOTERM_BP_4	GO:0044271~cellular nitrogen compound biosynthetic process	53	47.7477	8.53588e-09	FBGN0262955, FBGN0003716, FBGN0001233, FBGN0004861, FBGN0261239, FBGN0003339, FBGN0004009, FBGN0263289, FBGN0261617, FBGN0010382, FBGN0053554, FBGN0003751, FBGN0003567, FBGN0261885, FBGN0011766, FBGN0011763, FBGN0000625, FBGN0260642, FBGN0014388, FBGN0259749, FBGN0002783, FBGN0026160, FBGN0003415, FBGN0086680, FBGN0003042, FBGN0002781, FBGN0000490, FBGN0000117, FBGN0004647, FBGN0005561, FBGN00046…	111	2343	10386	2.11655	9.15042e-06	5.57955e-08	1.36059e-05
GOTERM_BP_4	GO:0034645~cellular macromolecule biosynthetic process	53	47.7477	1.37106e-08	FBGN0262955, FBGN0003716, FBGN0001233, FBGN0004861, FBGN0261239, FBGN0003339, FBGN0004009, FBGN0263289, FBGN0261617, FBGN0010382, FBGN0053554, FBGN0003751, FBGN0003567, FBGN0261885, FBGN0011766, FBGN0011763, FBGN0000625, FBGN0260642, FBGN0014388, FBGN0002783, FBGN0026160, FBGN0003415, FBGN0086680, FBGN0003042, FBGN0002781, FBGN0000490, FBGN0000117, FBGN0004647, FBGN0005561, FBGN0004644, FBGN00020…	111	2374	10386	2.08891	1.46977e-05	8.69692e-08	2.18543e-05
GOTERM_BP_4	GO:0010629~negative regulation of gene expression	24	21.6216	3.32926e-08	FBGN0011648, FBGN0003567, FBGN0003042, FBGN0000606, FBGN0003716, FBGN0036285, FBGN0000490, FBGN0011766, FBGN0001075, FBGN0004647, FBGN0004635, FBGN0004861, FBGN0000625, FBGN0004009, FBGN0004198, FBGN0263289, FBGN0001291, FBGN0002576, FBGN0000097, FBGN0013263, FBGN0003117, FBGN0022238, FBGN0005677, FBGN0010415	111	584	10386	3.84524	3.56891e-05	2.03941e-07	5.30674e-05
GOTERM_MF_4	GO:0001067~regulatory region nucleic acid binding	15	13.5135	3.94043e-08	FBGN0003053, FBGN0086680, FBGN0011648, FBGN0003042, FBGN0000606, FBGN0011766, FBGN0005561, FBGN0004861, FBGN0000625, FBGN0261239, FBGN0003339, FBGN0004198, FBGN0001291, FBGN0002576, FBGN0003117	102	179	8080	6.63819	3.90102e-06	3.90102e-06	4.36534e-05
GOTERM_BP_4	GO:0031324~negative regulation of cellular metabolic process	25	22.5225	5.11838e-08	FBGN0003042, FBGN0004647, FBGN0004861, FBGN0004644, FBGN0004009, FBGN0263289, FBGN0001291, FBGN0002576, FBGN0013263, FBGN0002121, FBGN0000229, FBGN0010382, FBGN0027053, FBGN0022238, FBGN0003371, FBGN0003053, FBGN0003567, FBGN0000606, FBGN0036285, FBGN0011766, FBGN0000625, FBGN0004198, FBGN0000097, FBGN0003117, FBGN0010415	111	648	10386	3.60986	5.48675e-05	3.09994e-07	8.15853e-05
GOTERM_BP_4	GO:0044260~cellular macromolecule metabolic process	72	64.8649	7.48735e-08	FBGN0262955, FBGN0003716, FBGN0001075, FBGN0001233, FBGN0004861, FBGN0261239, FBGN0003339, FBGN0004009, FBGN0263289, FBGN0261617, FBGN0010382, FBGN0053554, FBGN0027053, FBGN0003371, FBGN0014020, FBGN0003567, FBGN0003751, FBGN0261885, FBGN0033483, FBGN0005592, FBGN0015509, FBGN0011766, FBGN0010333, FBGN0030057, FBGN0011829, FBGN0003997, FBGN0000625, FBGN0011763, FBGN0260642, FBGN0014388, FBGN00034…	111	4092	10386	1.64635	8.02611e-05	4.41013e-07	0.000119346
GOTERM_BP_4	GO:0006139~nucleobase-containing compound metabolic process	52	46.8468	1.89441e-07	FBGN0262955, FBGN0003716, FBGN0001233, FBGN0004861, FBGN0261239, FBGN0003339, FBGN0004009, FBGN0263289, FBGN0261617, FBGN0053554, FBGN0010382, FBGN0003751, FBGN0003567, FBGN0261885, FBGN0011766, FBGN0011763, FBGN0000625, FBGN0260642, FBGN0014388, FBGN0259749, FBGN0002783, FBGN0026160, FBGN0003415, FBGN0086680, FBGN0003042, FBGN0002781, FBGN0000490, FBGN0000117, FBGN0004647, FBGN0005561, FBGN00046…	111	2481	10386	1.96111	0.000203061	1.05223e-06	0.000301963
GOTERM_BP_4	GO:0010467~gene expression	53	47.7477	8.78382e-07	FBGN0262955, FBGN0003716, FBGN0001075, FBGN0001233, FBGN0004861, FBGN0261239, FBGN0003339, FBGN0004009, FBGN0263289, FBGN0261617, FBGN0053554, FBGN0003567, FBGN0003751, FBGN0261885, FBGN0011766, FBGN0011763, FBGN0000625, FBGN0260642, FBGN0014388, FBGN0002783, FBGN0026160, FBGN0003415, FBGN0086680, FBGN0003042, FBGN0002781, FBGN0000490, FBGN0000117, FBGN0004647, FBGN0005561, FBGN0004644, FBGN00020…	111	2678	10386	1.85179	0.000941183	4.46267e-06	0.0014001
GOTERM_BP_4	GO:0051253~negative regulation of RNA metabolic process	17	15.3153	7.91428e-06	FBGN0003567, FBGN0003042, FBGN0000606, FBGN0036285, FBGN0011766, FBGN0004647, FBGN0004861, FBGN0000625, FBGN0004198, FBGN0004009, FBGN0263289, FBGN0001291, FBGN0002576, FBGN0000097, FBGN0013263, FBGN0022238, FBGN0003117	111	419	10386	3.7963	0.00844825	3.5647e-05	0.0126144
GOTERM_BP_4	GO:0010558~negative regulation of macromolecule biosynthetic process	18	16.2162	1.41693e-05	FBGN0003567, FBGN0003042, FBGN0000606, FBGN0036285, FBGN0011766, FBGN0004647, FBGN0004861, FBGN0000625, FBGN0004198, FBGN0004009, FBGN0263289, FBGN0001291, FBGN0002576, FBGN0000097, FBGN0013263, FBGN0022238, FBGN0003117, FBGN0010415	111	490	10386	3.43718	0.0150748	6.05146e-05	0.0225831
GOTERM_BP_4	GO:0045934~negative regulation of nucleobase-containing compound metabolic process	17	15.3153	1.4195e-05	FBGN0003567, FBGN0003042, FBGN0000606, FBGN0036285, FBGN0011766, FBGN0004647, FBGN0004861, FBGN0000625, FBGN0004198, FBGN0004009, FBGN0263289, FBGN0001291, FBGN0002576, FBGN0000097, FBGN0013263, FBGN0022238, FBGN0003117	111	439	10386	3.62335	0.0151019	6.03835e-05	0.0226239
GOTERM_MF_4	GO:0003677~DNA binding	28	25.2252	1.55956e-05	FBGN0002783, FBGN0086680, FBGN0262955, FBGN0003042, FBGN0002781, FBGN0005561, FBGN0004861, FBGN0261239, FBGN0003339, FBGN0001291, FBGN0002576, FBGN0013263, FBGN0033636, FBGN0022238, FBGN0003053, FBGN0011648, FBGN0003567, FBGN0261885, FBGN0000606, FBGN0036285, FBGN0011766, FBGN0000625, FBGN0011763, FBGN0260642, FBGN0004198, FBGN0000097, FBGN0003117, FBGN0001169	102	923	8080	2.40308	0.00154278	0.000771689	0.0172759
GOTERM_BP_4	GO:0031327~negative regulation of cellular biosynthetic process	18	16.2162	1.9883e-05	FBGN0003567, FBGN0003042, FBGN0000606, FBGN0036285, FBGN0011766, FBGN0004647, FBGN0004861, FBGN0000625, FBGN0004198, FBGN0004009, FBGN0263289, FBGN0001291, FBGN0002576, FBGN0000097, FBGN0013263, FBGN0022238, FBGN0003117, FBGN0010415	111	503	10386	3.34834	0.0210893	8.26122e-05	0.0316883
GOTERM_BP_4	GO:0009890~negative regulation of biosynthetic process	18	16.2162	1.9883e-05	FBGN0003567, FBGN0003042, FBGN0000606, FBGN0036285, FBGN0011766, FBGN0004647, FBGN0004861, FBGN0000625, FBGN0004198, FBGN0004009, FBGN0263289, FBGN0001291, FBGN0002576, FBGN0000097, FBGN0013263, FBGN0022238, FBGN0003117, FBGN0010415	111	503	10386	3.34834	0.0210893	8.26122e-05	0.0316883
GOTERM_BP_4	GO:0051172~negative regulation of nitrogen compound metabolic process	18	16.2162	2.82625e-05	FBGN0003567, FBGN0003042, FBGN0000606, FBGN0036285, FBGN0011766, FBGN0004647, FBGN0004861, FBGN0000625, FBGN0004198, FBGN0004009, FBGN0263289, FBGN0001291, FBGN0002576, FBGN0000097, FBGN0013263, FBGN0022238, FBGN0003117, FBGN0010415	111	517	10386	3.25767	0.0298434	0.000115194	0.04504
GOTERM_BP_4	GO:0006325~chromatin organization	13	11.7117	0.0113554	FBGN0026160, FBGN0002783, FBGN0003567, FBGN0011715, FBGN0261885, FBGN0261617, FBGN0002781, FBGN0013263, FBGN0033636, FBGN0053554, FBGN0022238, FBGN0000212, FBGN0000320	111	538	10386	2.26093	0.999995	0.0315406	16.6429
Annotation Cluster 19	Enrichment Score: 10.185741512929834
Category	Term	Count	%	PValue	Genes	List Total	Pop Hits	Pop Total	Fold Enrichment	Bonferroni	Benjamini	FDR
GOTERM_BP_4	GO:0002164~larval development	20	18.018	2.65178e-14	FBGN0003415, FBGN0000490, FBGN0004657, FBGN0000117, FBGN0011766, FBGN0001075, FBGN0010333, FBGN0004647, FBGN0004635, FBGN0004644, FBGN0004009, FBGN0263289, FBGN0003079, FBGN0002576, FBGN0003205, FBGN0002121, FBGN0022238, FBGN0027053, FBGN0003371, FBGN0000320	111	178	10386	10.5132	2.84448e-11	2.65787e-13	4.22995e-11
GOTERM_BP_4	GO:0048534~hematopoietic or lymphoid organ development	16	14.4144	1.2449e-13	FBGN0000490, FBGN0004657, FBGN0011766, FBGN0010333, FBGN0004647, FBGN0260642, FBGN0003391, FBGN0004009, FBGN0003079, FBGN0261617, FBGN0002576, FBGN0003205, FBGN0022238, FBGN0027053, FBGN0003117, FBGN0014020	111	101	10386	14.8226	1.33417e-10	1.21292e-12	1.98375e-10
GOTERM_BP_4	GO:0002520~immune system development	16	14.4144	1.2449e-13	FBGN0000490, FBGN0004657, FBGN0011766, FBGN0010333, FBGN0004647, FBGN0260642, FBGN0003391, FBGN0004009, FBGN0003079, FBGN0261617, FBGN0002576, FBGN0003205, FBGN0022238, FBGN0027053, FBGN0003117, FBGN0014020	111	101	10386	14.8226	1.33417e-10	1.21292e-12	1.98375e-10
GOTERM_BP_4	GO:0030097~hemopoiesis	14	12.6126	4.67721e-12	FBGN0000490, FBGN0004657, FBGN0011766, FBGN0010333, FBGN0004647, FBGN0003391, FBGN0004009, FBGN0003079, FBGN0261617, FBGN0002576, FBGN0003205, FBGN0022238, FBGN0027053, FBGN0014020	111	86	10386	15.2319	5.01402e-09	4.10986e-11	7.4554e-09
GOTERM_BP_4	GO:0048568~embryonic organ development	11	9.90991	1.56295e-10	FBGN0003391, FBGN0264089, FBGN0005631, FBGN0002576, FBGN0003205, FBGN0004657, FBGN0000229, FBGN0010333, FBGN0004647, FBGN0003117, FBGN0014020	111	53	10386	19.4197	1.67548e-07	1.23197e-09	2.49129e-07
GOTERM_BP_4	GO:0048542~lymph gland development	10	9.00901	1.13495e-08	FBGN0260642, FBGN0004009, FBGN0003079, FBGN0002576, FBGN0000490, FBGN0011766, FBGN0004647, FBGN0003117, FBGN0027053, FBGN0022238	111	60	10386	15.5946	1.21666e-05	7.24205e-08	1.80907e-05
GOTERM_BP_4	GO:0035162~embryonic hemopoiesis	7	6.30631	2.38438e-07	FBGN0003391, FBGN0002576, FBGN0003205, FBGN0004657, FBGN0010333, FBGN0004647, FBGN0014020	111	26	10386	25.1913	0.000255573	1.29749e-06	0.000380062
GOTERM_BP_4	GO:0035166~post-embryonic hemopoiesis	8	7.20721	4.01771e-07	FBGN0004009, FBGN0003079, FBGN0002576, FBGN0000490, FBGN0011766, FBGN0004647, FBGN0027053, FBGN0022238	111	45	10386	16.6342	0.000430605	2.14277e-06	0.000640408
Annotation Cluster 20	Enrichment Score: 9.677852216303593
Category	Term	Count	%	PValue	Genes	List Total	Pop Hits	Pop Total	Fold Enrichment	Bonferroni	Benjamini	FDR
GOTERM_BP_4	GO:0198738~cell-cell signaling by wnt	18	16.2162	4.87559e-14	FBGN0003415, FBGN0026597, FBGN0261885, FBGN0001085, FBGN0000117, FBGN0001075, FBGN0003041, FBGN0011817, FBGN0000499, FBGN0004009, FBGN0016797, FBGN0026181, FBGN0261617, FBGN0000097, FBGN0000229, FBGN0003371, FBGN0014020, FBGN0002945	111	136	10386	12.3839	5.2248e-11	4.83724e-13	7.76934e-11
GOTERM_BP_4	GO:1905114~cell surface receptor signaling pathway involved in cell-cell signaling	18	16.2162	6.24207e-14	FBGN0003415, FBGN0026597, FBGN0261885, FBGN0001085, FBGN0000117, FBGN0001075, FBGN0003041, FBGN0011817, FBGN0000499, FBGN0004009, FBGN0016797, FBGN0026181, FBGN0261617, FBGN0000097, FBGN0000229, FBGN0003371, FBGN0014020, FBGN0002945	111	138	10386	12.2045	6.68869e-11	6.1362e-13	9.94538e-11
GOTERM_BP_4	GO:0007267~cell-cell signaling	32	28.8288	1.4631e-12	FBGN0003415, FBGN0026597, FBGN0003716, FBGN0000117, FBGN0001075, FBGN0004647, FBGN0003041, FBGN0011817, FBGN0000499, FBGN0004644, FBGN0004009, FBGN0260003, FBGN0000635, FBGN0000463, FBGN0016797, FBGN0261617, FBGN0002121, FBGN0000229, FBGN0003371, FBGN0014020, FBGN0261885, FBGN0264089, FBGN0033483, FBGN0001085, FBGN0266579, FBGN0013733, FBGN0010473, FBGN0026181, FBGN0000097, FBGN0030941, FBGN00011…	111	678	10386	4.41617	1.56839e-09	1.37578e-11	2.33206e-09
KEGG_PATHWAY	dme04310:Wnt signaling pathway	15	13.5135	6.97364e-11	FBGN0026597, FBGN0001085, FBGN0015509, FBGN0025641, FBGN0000117, FBGN0010333, FBGN0011817, FBGN0000499, FBGN0004009, FBGN0016797, FBGN0261617, FBGN0000229, FBGN0003371, FBGN0014020, FBGN0002945	48	89	2752	9.66292	2.09209e-09	2.09209e-09	5.94046e-08
GOTERM_BP_4	GO:0030178~negative regulation of Wnt signaling pathway	8	7.20721	1.18753e-07	FBGN0026597, FBGN0000097, FBGN0001075, FBGN0003041, FBGN0011817, FBGN0003371, FBGN0002945, FBGN0014020	111	38	10386	19.6984	0.000127296	6.66511e-07	0.000189289
GOTERM_BP_4	GO:0030111~regulation of Wnt signaling pathway	10	9.00901	5.52424e-07	FBGN0003415, FBGN0026597, FBGN0026181, FBGN0000097, FBGN0001075, FBGN0003041, FBGN0011817, FBGN0003371, FBGN0002945, FBGN0014020	111	93	10386	10.061	0.000592023	2.90293e-06	0.000880543
UP_KEYWORDS	Wnt signaling pathway	7	6.30631	8.83134e-07	FBGN0000499, FBGN0026597, FBGN0004009, FBGN0016797, FBGN0001085, FBGN0000117, FBGN0002945	111	42	13921	20.9024	0.000110386	7.35943e-06	0.00102126
Annotation Cluster 21	Enrichment Score: 7.213134527431392
Category	Term	Count	%	PValue	Genes	List Total	Pop Hits	Pop Total	Fold Enrichment	Bonferroni	Benjamini	FDR
GOTERM_BP_4	GO:0001763~morphogenesis of a branching structure	12	10.8108	5.60575e-10	FBGN0014388, FBGN0003391, FBGN0004009, FBGN0003716, FBGN0003079, FBGN0005592, FBGN0000490, FBGN0003205, FBGN0000117, FBGN0013733, FBGN0004635, FBGN0014020	111	79	10386	14.2128	6.00937e-07	4.17317e-09	8.9354e-07
GOTERM_BP_4	GO:0061138~morphogenesis of a branching epithelium	10	9.00901	9.50182e-08	FBGN0014388, FBGN0003391, FBGN0004009, FBGN0003079, FBGN0005592, FBGN0000490, FBGN0003205, FBGN0000117, FBGN0013733, FBGN0014020	111	76	10386	12.3115	0.000101854	5.47632e-07	0.000151456
GOTERM_BP_4	GO:0048754~branching morphogenesis of an epithelial tube	10	9.00901	9.50182e-08	FBGN0014388, FBGN0003391, FBGN0004009, FBGN0003079, FBGN0005592, FBGN0000490, FBGN0003205, FBGN0000117, FBGN0013733, FBGN0014020	111	76	10386	12.3115	0.000101854	5.47632e-07	0.000151456
GOTERM_BP_4	GO:0035146~tube fusion	6	5.40541	2.77469e-06	FBGN0003391, FBGN0004009, FBGN0000490, FBGN0000117, FBGN0013733, FBGN0014020	111	22	10386	25.5184	0.00297005	1.33984e-05	0.00442267
Annotation Cluster 22	Enrichment Score: 6.823215155157459
Category	Term	Count	%	PValue	Genes	List Total	Pop Hits	Pop Total	Fold Enrichment	Bonferroni	Benjamini	FDR
GOTERM_BP_4	GO:0009798~axis specification	23	20.7207	3.07682e-15	FBGN0003053, FBGN0003751, FBGN0004875, FBGN0000606, FBGN0000490, FBGN0004647, FBGN0001233, FBGN0011763, FBGN0004644, FBGN0260642, FBGN0014388, FBGN0004009, FBGN0003391, FBGN0263289, FBGN0000463, FBGN0026181, FBGN0003079, FBGN0003731, FBGN0003205, FBGN0002121, FBGN0003256, FBGN0027053, FBGN0265434	111	235	10386	9.15768	3.33245e-12	3.26406e-14	4.95159e-12
GOTERM_BP_4	GO:0048469~cell maturation	16	14.4144	5.40642e-09	FBGN0004875, FBGN0003042, FBGN0000490, FBGN0015509, FBGN0004647, FBGN0001233, FBGN0000635, FBGN0003391, FBGN0263289, FBGN0000463, FBGN0026181, FBGN0003731, FBGN0003205, FBGN0002121, FBGN0000229, FBGN0027053	111	211	10386	7.09517	5.79567e-06	3.57758e-08	8.61767e-06
GOTERM_BP_4	GO:0007309~oocyte axis specification	12	10.8108	3.76222e-07	FBGN0003391, FBGN0263289, FBGN0004875, FBGN0000463, FBGN0026181, FBGN0000490, FBGN0003731, FBGN0003205, FBGN0002121, FBGN0004647, FBGN0027053, FBGN0001233	111	146	10386	7.69049	0.000403228	2.01655e-06	0.000599684
GOTERM_BP_4	GO:0007308~oocyte construction	12	10.8108	4.9413e-07	FBGN0003391, FBGN0263289, FBGN0004875, FBGN0000463, FBGN0026181, FBGN0000490, FBGN0003731, FBGN0003205, FBGN0002121, FBGN0004647, FBGN0027053, FBGN0001233	111	150	10386	7.48541	0.000529568	2.60939e-06	0.000787626
GOTERM_BP_4	GO:0008356~asymmetric cell division	10	9.00901	1.43253e-06	FBGN0003391, FBGN0004875, FBGN0000463, FBGN0001085, FBGN0002121, FBGN0010382, FBGN0004647, FBGN0027053, FBGN0002643, FBGN0265434	111	104	10386	8.99688	0.0015345	7.17604e-06	0.00228339
GOTERM_BP_4	GO:0048599~oocyte development	12	10.8108	2.03922e-06	FBGN0003391, FBGN0263289, FBGN0004875, FBGN0000463, FBGN0026181, FBGN0000490, FBGN0003731, FBGN0003205, FBGN0002121, FBGN0004647, FBGN0027053, FBGN0001233	111	173	10386	6.49024	0.00218366	1.00277e-05	0.0032504
GOTERM_BP_4	GO:0009994~oocyte differentiation	12	10.8108	6.50609e-06	FBGN0003391, FBGN0263289, FBGN0004875, FBGN0000463, FBGN0026181, FBGN0000490, FBGN0003731, FBGN0003205, FBGN0002121, FBGN0004647, FBGN0027053, FBGN0001233	111	195	10386	5.758	0.00695028	2.99332e-05	0.01037
GOTERM_BP_4	GO:0007293~germarium-derived egg chamber formation	10	9.00901	7.54921e-06	FBGN0003391, FBGN0004875, FBGN0000463, FBGN0002121, FBGN0000117, FBGN0011591, FBGN0004647, FBGN0003041, FBGN0027053, FBGN0004861	111	127	10386	7.36753	0.00806012	3.44368e-05	0.0120325
GOTERM_BP_4	GO:0007314~oocyte anterior/posterior axis specification	8	7.20721	8.78974e-05	FBGN0003391, FBGN0263289, FBGN0000463, FBGN0003731, FBGN0002121, FBGN0004647, FBGN0027053, FBGN0001233	111	100	10386	7.48541	0.0899267	0.000332913	0.140014
Annotation Cluster 23	Enrichment Score: 6.670290111390105
Category	Term	Count	%	PValue	Genes	List Total	Pop Hits	Pop Total	Fold Enrichment	Bonferroni	Benjamini	FDR
GOTERM_BP_4	GO:0030334~regulation of cell migration	10	9.00901	1.95703e-10	FBGN0004644, FBGN0003053, FBGN0250876, FBGN0264089, FBGN0005631, FBGN0004657, FBGN0000229, FBGN0003892, FBGN0011260, FBGN0014020	111	39	10386	23.9917	2.09794e-07	1.52025e-09	3.11945e-07
GOTERM_BP_4	GO:2000145~regulation of cell motility	10	9.00901	2.50309e-10	FBGN0004644, FBGN0003053, FBGN0250876, FBGN0264089, FBGN0005631, FBGN0004657, FBGN0000229, FBGN0003892, FBGN0011260, FBGN0014020	111	40	10386	23.3919	2.68331e-07	1.90306e-09	3.98985e-07
GOTERM_BP_4	GO:0030335~positive regulation of cell migration	4	3.6036	0.000179305	FBGN0003053, FBGN0250876, FBGN0000229, FBGN0011260	111	11	10386	34.0246	0.174885	0.000647036	0.285424
GOTERM_BP_4	GO:2000147~positive regulation of cell motility	4	3.6036	0.000237232	FBGN0003053, FBGN0250876, FBGN0000229, FBGN0011260	111	12	10386	31.1892	0.224574	0.000844636	0.377471
Annotation Cluster 24	Enrichment Score: 5.944916419988256
Category	Term	Count	%	PValue	Genes	List Total	Pop Hits	Pop Total	Fold Enrichment	Bonferroni	Benjamini	FDR
GOTERM_BP_4	GO:0035215~genital disc development	15	13.5135	3.34108e-17	FBGN0003716, FBGN0005592, FBGN0000490, FBGN0004657, FBGN0004647, FBGN0004635, FBGN0004644, FBGN0000635, FBGN0004009, FBGN0011706, FBGN0002576, FBGN0003731, FBGN0000229, FBGN0003892, FBGN0005677	111	48	10386	29.2399	3.58164e-14	4.2137e-16	5.32558e-14
GOTERM_BP_4	GO:0007484~imaginal disc-derived genitalia development	6	5.40541	8.15472e-06	FBGN0000635, FBGN0011706, FBGN0002576, FBGN0004657, FBGN0000229, FBGN0004647	111	27	10386	20.7928	0.0087038	3.65763e-05	0.0129976
GOTERM_BP_4	GO:0046661~male sex differentiation	6	5.40541	1.40353e-05	FBGN0000635, FBGN0011706, FBGN0004657, FBGN0000229, FBGN0004647, FBGN0000320	111	30	10386	18.7135	0.0149333	6.04236e-05	0.0223695
GOTERM_BP_4	GO:0048806~genitalia development	6	5.40541	1.95018e-05	FBGN0000635, FBGN0011706, FBGN0002576, FBGN0004657, FBGN0000229, FBGN0004647	111	32	10386	17.5439	0.0206891	8.16613e-05	0.0310808
GOTERM_BP_4	GO:0035126~post-embryonic genitalia morphogenesis	5	4.5045	2.54936e-05	FBGN0000635, FBGN0011706, FBGN0004657, FBGN0000229, FBGN0004647	111	17	10386	27.5199	0.0269594	0.000104306	0.0406283
GOTERM_BP_4	GO:0090598~male anatomical structure morphogenesis	5	4.5045	2.54936e-05	FBGN0000635, FBGN0011706, FBGN0004657, FBGN0000229, FBGN0004647	111	17	10386	27.5199	0.0269594	0.000104306	0.0406283
GOTERM_BP_4	GO:0048808~male genitalia morphogenesis	5	4.5045	2.54936e-05	FBGN0000635, FBGN0011706, FBGN0004657, FBGN0000229, FBGN0004647	111	17	10386	27.5199	0.0269594	0.000104306	0.0406283
GOTERM_BP_4	GO:0035112~genitalia morphogenesis	5	4.5045	4.08451e-05	FBGN0000635, FBGN0011706, FBGN0004657, FBGN0000229, FBGN0004647	111	19	10386	24.623	0.042842	0.000160378	0.065086
GOTERM_BP_4	GO:0030539~male genitalia development	5	4.5045	6.20478e-05	FBGN0000635, FBGN0011706, FBGN0004657, FBGN0000229, FBGN0004647	111	21	10386	22.278	0.0643533	0.000236688	0.0988565
Annotation Cluster 25	Enrichment Score: 5.828584194815556
Category	Term	Count	%	PValue	Genes	List Total	Pop Hits	Pop Total	Fold Enrichment	Bonferroni	Benjamini	FDR
GOTERM_BP_4	GO:0010160~formation of organ boundary	11	9.90991	3.47509e-11	FBGN0003339, FBGN0011648, FBGN0003716, FBGN0264089, FBGN0013718, FBGN0005631, FBGN0001085, FBGN0002576, FBGN0000490, FBGN0004635, FBGN0001169	111	46	10386	22.3749	3.72529e-08	2.84374e-10	5.53918e-08
GOTERM_BP_4	GO:0060581~cell fate commitment involved in pattern specification	8	7.20721	5.24149e-08	FBGN0004009, FBGN0263289, FBGN0013718, FBGN0001085, FBGN0002576, FBGN0003731, FBGN0004635, FBGN0001169	111	34	10386	22.0159	5.61872e-05	3.15668e-07	8.35478e-05
GOTERM_BP_4	GO:0060582~cell fate determination involved in pattern specification	4	3.6036	0.00133799	FBGN0013718, FBGN0001085, FBGN0002576, FBGN0001169	111	21	10386	17.8224	0.761952	0.00435307	2.11153
GOTERM_BP_4	GO:0008052~sensory organ boundary specification	4	3.6036	0.00198971	FBGN0013718, FBGN0001085, FBGN0002576, FBGN0001169	111	24	10386	15.5946	0.881766	0.00627842	3.12483
Annotation Cluster 26	Enrichment Score: 5.591778056576886
Category	Term	Count	%	PValue	Genes	List Total	Pop Hits	Pop Total	Fold Enrichment	Bonferroni	Benjamini	FDR
GOTERM_BP_4	GO:0030036~actin cytoskeleton organization	18	16.2162	2.14657e-09	FBGN0013718, FBGN0001085, FBGN0025641, FBGN0004657, FBGN0013733, FBGN0010333, FBGN0003041, FBGN0011829, FBGN0004647, FBGN0001233, FBGN0000499, FBGN0004009, FBGN0000463, FBGN0026181, FBGN0002121, FBGN0023172, FBGN0265434, FBGN0014020	111	264	10386	6.37961	2.30112e-06	1.504e-08	3.42157e-06
GOTERM_BP_4	GO:0007010~cytoskeleton organization	24	21.6216	2.2762e-07	FBGN0013718, FBGN0001085, FBGN0004657, FBGN0025641, FBGN0000117, FBGN0266579, FBGN0010333, FBGN0013733, FBGN0001075, FBGN0004647, FBGN0266521, FBGN0003041, FBGN0011829, FBGN0001233, FBGN0000497, FBGN0000499, FBGN0004009, FBGN0000463, FBGN0026181, FBGN0002121, FBGN0023172, FBGN0003371, FBGN0265434, FBGN0014020	111	649	10386	3.46013	0.000243979	1.25778e-06	0.000362819
GOTERM_BP_4	GO:1902589~single-organism organelle organization	25	22.5225	1.2452e-05	FBGN0013718, FBGN0001085, FBGN0004657, FBGN0025641, FBGN0000117, FBGN0266579, FBGN0010333, FBGN0013733, FBGN0001075, FBGN0004647, FBGN0011829, FBGN0266521, FBGN0003041, FBGN0001233, FBGN0004861, FBGN0000497, FBGN0000499, FBGN0004009, FBGN0000463, FBGN0026181, FBGN0002121, FBGN0023172, FBGN0003371, FBGN0265434, FBGN0014020	111	880	10386	2.65817	0.01326	5.40417e-05	0.0198463
GOTERM_BP_4	GO:0000226~microtubule cytoskeleton organization	11	9.90991	0.00705816	FBGN0000499, FBGN0026181, FBGN0002121, FBGN0266579, FBGN0013733, FBGN0001075, FBGN0003041, FBGN0266521, FBGN0001233, FBGN0003371, FBGN0000497	111	381	10386	2.70143	0.999496	0.0204222	10.6763
Annotation Cluster 27	Enrichment Score: 5.586025284567644
Category	Term	Count	%	PValue	Genes	List Total	Pop Hits	Pop Total	Fold Enrichment	Bonferroni	Benjamini	FDR
GOTERM_BP_4	GO:0010769~regulation of cell morphogenesis involved in differentiation	17	15.3153	7.30201e-16	FBGN0086680, FBGN0250876, FBGN0000606, FBGN0264089, FBGN0005592, FBGN0001085, FBGN0025641, FBGN0013733, FBGN0010333, FBGN0030057, FBGN0003041, FBGN0011260, FBGN0000499, FBGN0010473, FBGN0026181, FBGN0023172, FBGN0014020	111	89	10386	17.8725	8.33111e-13	8.65974e-15	1.24345e-12
GOTERM_BP_4	GO:0060560~developmental growth involved in morphogenesis	17	15.3153	1.05795e-15	FBGN0250876, FBGN0264089, FBGN0003716, FBGN0005592, FBGN0001085, FBGN0004657, FBGN0025641, FBGN0000117, FBGN0013733, FBGN0010333, FBGN0011260, FBGN0000499, FBGN0004009, FBGN0016797, FBGN0023172, FBGN0000229, FBGN0014020	111	91	10386	17.4797	1.19016e-12	1.21014e-14	1.76525e-12
GOTERM_BP_4	GO:0031344~regulation of cell projection organization	19	17.1171	1.33985e-15	FBGN0086680, FBGN0250876, FBGN0000606, FBGN0264089, FBGN0005592, FBGN0005631, FBGN0001085, FBGN0025641, FBGN0010333, FBGN0013733, FBGN0030057, FBGN0003041, FBGN0004647, FBGN0011260, FBGN0000499, FBGN0010473, FBGN0026181, FBGN0023172, FBGN0014020	111	130	10386	13.6753	1.42819e-12	1.43219e-14	2.12053e-12
GOTERM_BP_4	GO:1990138~neuron projection extension	11	9.90991	1.90135e-10	FBGN0000499, FBGN0250876, FBGN0016797, FBGN0264089, FBGN0005592, FBGN0001085, FBGN0025641, FBGN0000229, FBGN0010333, FBGN0013733, FBGN0011260	111	54	10386	19.0601	2.03824e-07	1.48777e-09	3.03069e-07
GOTERM_BP_4	GO:0048588~developmental cell growth	11	9.90991	4.78621e-09	FBGN0000499, FBGN0250876, FBGN0016797, FBGN0264089, FBGN0005592, FBGN0001085, FBGN0025641, FBGN0000229, FBGN0010333, FBGN0013733, FBGN0011260	111	74	10386	13.9087	5.1308e-06	3.20676e-08	7.62907e-06
GOTERM_BP_4	GO:0050769~positive regulation of neurogenesis	10	9.00901	4.01975e-08	FBGN0000499, FBGN0003079, FBGN0001085, FBGN0000097, FBGN0003205, FBGN0000229, FBGN0010333, FBGN0013733, FBGN0003256, FBGN0003041	111	69	10386	13.5605	4.30908e-05	2.4484e-07	6.40736e-05
GOTERM_BP_4	GO:0051272~positive regulation of cellular component movement	7	6.30631	7.99807e-08	FBGN0000499, FBGN0003053, FBGN0250876, FBGN0001085, FBGN0000229, FBGN0010333, FBGN0011260	111	22	10386	29.7715	8.57356e-05	4.65974e-07	0.000127487
GOTERM_BP_4	GO:0061387~regulation of extent of cell growth	7	6.30631	1.41815e-07	FBGN0000499, FBGN0250876, FBGN0005592, FBGN0001085, FBGN0010333, FBGN0013733, FBGN0011260	111	24	10386	27.2905	0.000152015	7.91803e-07	0.000226049
GOTERM_BP_4	GO:0030516~regulation of axon extension	7	6.30631	1.41815e-07	FBGN0000499, FBGN0250876, FBGN0005592, FBGN0001085, FBGN0010333, FBGN0013733, FBGN0011260	111	24	10386	27.2905	0.000152015	7.91803e-07	0.000226049
GOTERM_BP_4	GO:0050920~regulation of chemotaxis	7	6.30631	3.03936e-07	FBGN0000499, FBGN0250876, FBGN0264089, FBGN0001085, FBGN0010333, FBGN0030057, FBGN0011260	111	27	10386	24.2583	0.000325766	1.63728e-06	0.000484463
GOTERM_BP_4	GO:0061339~establishment or maintenance of monopolar cell polarity	6	5.40541	4.84158e-07	FBGN0000499, FBGN0263289, FBGN0001085, FBGN0010333, FBGN0001075, FBGN0000497	111	16	10386	35.0878	0.000518883	2.56939e-06	0.000771731
GOTERM_BP_4	GO:1902667~regulation of axon guidance	6	5.40541	4.40348e-06	FBGN0000499, FBGN0250876, FBGN0001085, FBGN0010333, FBGN0030057, FBGN0011260	111	24	10386	23.3919	0.00470941	2.10736e-05	0.00701878
GOTERM_BP_4	GO:0008361~regulation of cell size	9	8.10811	9.43534e-06	FBGN0000499, FBGN0250876, FBGN0005592, FBGN0001085, FBGN0003205, FBGN0010333, FBGN0013733, FBGN0003041, FBGN0011260	111	99	10386	8.50614	0.0100637	4.19689e-05	0.0150386
GOTERM_BP_4	GO:0001558~regulation of cell growth	8	7.20721	1.35386e-05	FBGN0000499, FBGN0250876, FBGN0005592, FBGN0001085, FBGN0003205, FBGN0010333, FBGN0013733, FBGN0011260	111	75	10386	9.98054	0.0144087	5.85205e-05	0.021578
GOTERM_BP_4	GO:0032535~regulation of cellular component size	10	9.00901	4.13844e-05	FBGN0000499, FBGN0250876, FBGN0005592, FBGN0001085, FBGN0003205, FBGN0025641, FBGN0010333, FBGN0013733, FBGN0003041, FBGN0011260	111	157	10386	5.95972	0.0433953	0.000161903	0.0659451
GOTERM_BP_4	GO:0050921~positive regulation of chemotaxis	4	3.6036	0.000131416	FBGN0000499, FBGN0264089, FBGN0001085, FBGN0010333	111	10	10386	37.427	0.131413	0.00048738	0.209268
GOTERM_BP_4	GO:0045773~positive regulation of axon extension	4	3.6036	0.000131416	FBGN0000499, FBGN0001085, FBGN0010333, FBGN0013733	111	10	10386	37.427	0.131413	0.00048738	0.209268
GOTERM_BP_4	GO:0050919~negative chemotaxis	4	3.6036	0.000705495	FBGN0000499, FBGN0016797, FBGN0264089, FBGN0011260	111	17	10386	22.0159	0.530721	0.00237629	1.11863
GOTERM_BP_4	GO:0030307~positive regulation of cell growth	5	4.5045	0.000811647	FBGN0000499, FBGN0001085, FBGN0003205, FBGN0010333, FBGN0013733	111	40	10386	11.6959	0.581232	0.00271642	1.28593
GOTERM_BP_4	GO:0032103~positive regulation of response to external stimulus	5	4.5045	0.0013804	FBGN0000499, FBGN0086680, FBGN0264089, FBGN0001085, FBGN0010333	111	46	10386	10.1704	0.772548	0.00447727	2.17778
GOTERM_BP_4	GO:0048640~negative regulation of developmental growth	6	5.40541	0.0017372	FBGN0263289, FBGN0250876, FBGN0005592, FBGN0001075, FBGN0011260, FBGN0003371	111	82	10386	6.84641	0.844934	0.00554844	2.73341
GOTERM_BP_4	GO:0031346~positive regulation of cell projection organization	5	4.5045	0.00188602	FBGN0000499, FBGN0001085, FBGN0025641, FBGN0010333, FBGN0013733	111	50	10386	9.35676	0.867837	0.00596945	2.96427
GOTERM_BP_4	GO:0051129~negative regulation of cellular component organization	8	7.20721	0.00230165	FBGN0003053, FBGN0003567, FBGN0250876, FBGN0005592, FBGN0010333, FBGN0013733, FBGN0011260, FBGN0003371	111	172	10386	4.35198	0.915434	0.00713448	3.60636
GOTERM_BP_4	GO:0030517~negative regulation of axon extension	3	2.7027	0.00298558	FBGN0250876, FBGN0005592, FBGN0011260	111	8	10386	35.0878	0.959454	0.00909041	4.65424
GOTERM_BP_4	GO:0031345~negative regulation of cell projection organization	4	3.6036	0.00312308	FBGN0250876, FBGN0005592, FBGN0010333, FBGN0011260	111	28	10386	13.3668	0.965027	0.00945411	4.86362
GOTERM_BP_4	GO:0010770~positive regulation of cell morphogenesis involved in differentiation	4	3.6036	0.00381157	FBGN0000499, FBGN0001085, FBGN0010333, FBGN0013733	111	30	10386	12.4757	0.983324	0.0114978	5.90557
GOTERM_BP_4	GO:1902669~positive regulation of axon guidance	3	2.7027	0.00381211	FBGN0000499, FBGN0001085, FBGN0010333	111	9	10386	31.1892	0.983334	0.0114672	5.90639
GOTERM_BP_4	GO:0010771~negative regulation of cell morphogenesis involved in differentiation	3	2.7027	0.018651	FBGN0250876, FBGN0005592, FBGN0011260	111	20	10386	14.0351	1	0.0500589	25.9254
GOTERM_BP_4	GO:0030308~negative regulation of cell growth	3	2.7027	0.018651	FBGN0250876, FBGN0005592, FBGN0011260	111	20	10386	14.0351	1	0.0500589	25.9254
Annotation Cluster 28	Enrichment Score: 5.343039154377742
Category	Term	Count	%	PValue	Genes	List Total	Pop Hits	Pop Total	Fold Enrichment	Bonferroni	Benjamini	FDR
GOTERM_BP_4	GO:0035556~intracellular signal transduction	31	27.9279	1.47616e-12	FBGN0000490, FBGN0001075, FBGN0003041, FBGN0004647, FBGN0004644, FBGN0000499, FBGN0263289, FBGN0001291, FBGN0003079, FBGN0000229, FBGN0010382, FBGN0003256, FBGN0003371, FBGN0014020, FBGN0003053, FBGN0264895, FBGN0033483, FBGN0005592, FBGN0015509, FBGN0010333, FBGN0003997, FBGN0011763, FBGN0014388, FBGN0011706, FBGN0026181, FBGN0035574, FBGN0000097, FBGN0003205, FBGN0010909, FBGN0023172, FBGN00002…	111	633	10386	4.5823	1.58244e-09	1.37603e-11	2.35294e-09
GOTERM_BP_4	GO:0000165~MAPK cascade	14	12.6126	2.01102e-09	FBGN0003053, FBGN0033483, FBGN0005592, FBGN0010333, FBGN0004647, FBGN0001291, FBGN0003079, FBGN0003205, FBGN0000097, FBGN0010909, FBGN0000229, FBGN0003256, FBGN0003371, FBGN0014020	111	138	10386	9.49236	2.15581e-06	1.4183e-08	3.2055e-06
GOTERM_BP_4	GO:0023014~signal transduction by protein phosphorylation	14	12.6126	2.01102e-09	FBGN0003053, FBGN0033483, FBGN0005592, FBGN0010333, FBGN0004647, FBGN0001291, FBGN0003079, FBGN0003205, FBGN0000097, FBGN0010909, FBGN0000229, FBGN0003256, FBGN0003371, FBGN0014020	111	138	10386	9.49236	2.15581e-06	1.4183e-08	3.2055e-06
GOTERM_BP_4	GO:0051174~regulation of phosphorus metabolic process	18	16.2162	1.03612e-08	FBGN0003053, FBGN0005592, FBGN0000490, FBGN0010333, FBGN0004647, FBGN0034789, FBGN0026181, FBGN0003079, FBGN0003205, FBGN0010909, FBGN0013263, FBGN0002121, FBGN0000229, FBGN0010382, FBGN0003256, FBGN0027053, FBGN0003371, FBGN0014020	111	293	10386	5.74818	1.11072e-05	6.65105e-08	1.65155e-05
GOTERM_BP_4	GO:0043412~macromolecule modification	39	35.1351	5.81852e-08	FBGN0003716, FBGN0002781, FBGN0000490, FBGN0001075, FBGN0004647, FBGN0011817, FBGN0000497, FBGN0004644, FBGN0001291, FBGN0261617, FBGN0003079, FBGN0003731, FBGN0002121, FBGN0013263, FBGN0000229, FBGN0010382, FBGN0053554, FBGN0003256, FBGN0027053, FBGN0022238, FBGN0003371, FBGN0000320, FBGN0014020, FBGN0003567, FBGN0003053, FBGN0261885, FBGN0033483, FBGN0005592, FBGN0015509, FBGN0010333, FBGN00115…	111	1475	10386	2.47399	6.23726e-05	3.46525e-07	9.27453e-05
GOTERM_BP_4	GO:0036211~protein modification process	35	31.5315	9.00403e-07	FBGN0003716, FBGN0000490, FBGN0001075, FBGN0004647, FBGN0011817, FBGN0000497, FBGN0004644, FBGN0001291, FBGN0261617, FBGN0003079, FBGN0003731, FBGN0002121, FBGN0013263, FBGN0000229, FBGN0010382, FBGN0053554, FBGN0003256, FBGN0027053, FBGN0003371, FBGN0000320, FBGN0014020, FBGN0003053, FBGN0033483, FBGN0005592, FBGN0015509, FBGN0010333, FBGN0011591, FBGN0011829, FBGN0030057, FBGN0011706, FBGN00261…	111	1367	10386	2.39566	0.000964767	4.55297e-06	0.00143521
GOTERM_BP_4	GO:0032268~regulation of cellular protein metabolic process	21	18.9189	2.02208e-06	FBGN0003053, FBGN0005592, FBGN0000490, FBGN0010333, FBGN0003997, FBGN0004647, FBGN0004644, FBGN0011706, FBGN0026181, FBGN0003079, FBGN0003205, FBGN0010909, FBGN0013263, FBGN0002121, FBGN0000229, FBGN0010382, FBGN0003256, FBGN0027053, FBGN0003371, FBGN0014020, FBGN0010415	111	573	10386	3.42918	0.00216532	9.98922e-06	0.00322309
GOTERM_BP_4	GO:0051246~regulation of protein metabolic process	21	18.9189	5.24196e-06	FBGN0003053, FBGN0005592, FBGN0000490, FBGN0010333, FBGN0003997, FBGN0004647, FBGN0004644, FBGN0011706, FBGN0026181, FBGN0003079, FBGN0003205, FBGN0010909, FBGN0013263, FBGN0002121, FBGN0000229, FBGN0010382, FBGN0003256, FBGN0027053, FBGN0003371, FBGN0014020, FBGN0010415	111	610	10386	3.22118	0.00560363	2.48643e-05	0.00835519
GOTERM_BP_4	GO:0032270~positive regulation of cellular protein metabolic process	13	11.7117	6.46036e-06	FBGN0005592, FBGN0000490, FBGN0010333, FBGN0003997, FBGN0011706, FBGN0003079, FBGN0003205, FBGN0013263, FBGN0010909, FBGN0003256, FBGN0027053, FBGN0003371, FBGN0014020	111	234	10386	5.1982	0.0069016	2.9851e-05	0.0102971
GOTERM_BP_4	GO:0051247~positive regulation of protein metabolic process	13	11.7117	1.03094e-05	FBGN0005592, FBGN0000490, FBGN0010333, FBGN0003997, FBGN0011706, FBGN0003079, FBGN0003205, FBGN0013263, FBGN0010909, FBGN0003256, FBGN0027053, FBGN0003371, FBGN0014020	111	245	10386	4.96481	0.0109908	4.54792e-05	0.0164315
GOTERM_BP_4	GO:0051338~regulation of transferase activity	9	8.10811	1.45807e-05	FBGN0005592, FBGN0010909, FBGN0002121, FBGN0000229, FBGN0010382, FBGN0010333, FBGN0027053, FBGN0003371, FBGN0014020	111	105	10386	8.02008	0.0155091	6.17793e-05	0.0232387
GOTERM_BP_4	GO:0010562~positive regulation of phosphorus metabolic process	10	9.00901	1.86471e-05	FBGN0003079, FBGN0005592, FBGN0000490, FBGN0003205, FBGN0010909, FBGN0013263, FBGN0010333, FBGN0003256, FBGN0034789, FBGN0014020	111	142	10386	6.58927	0.0197914	7.83886e-05	0.0297188
GOTERM_BP_4	GO:0006796~phosphate-containing compound metabolic process	27	24.3243	3.10159e-05	FBGN0003716, FBGN0000490, FBGN0004647, FBGN0011817, FBGN0034789, FBGN0001291, FBGN0003079, FBGN0003731, FBGN0013263, FBGN0002121, FBGN0000229, FBGN0010382, FBGN0003256, FBGN0027053, FBGN0003371, FBGN0000320, FBGN0014020, FBGN0003053, FBGN0033483, FBGN0005592, FBGN0010333, FBGN0011829, FBGN0026181, FBGN0000097, FBGN0003205, FBGN0010909, FBGN0003892	111	1057	10386	2.39009	0.0327029	0.000125937	0.049427
GOTERM_BP_4	GO:0032269~negative regulation of cellular protein metabolic process	9	8.10811	0.00263872	FBGN0004644, FBGN0003053, FBGN0002121, FBGN0000229, FBGN0010382, FBGN0004647, FBGN0027053, FBGN0003371, FBGN0010415	111	225	10386	3.7427	0.941132	0.00810619	4.12415
GOTERM_BP_4	GO:0051248~negative regulation of protein metabolic process	9	8.10811	0.00271191	FBGN0004644, FBGN0003053, FBGN0002121, FBGN0000229, FBGN0010382, FBGN0004647, FBGN0027053, FBGN0003371, FBGN0010415	111	226	10386	3.72614	0.945585	0.0083066	4.23622
GOTERM_BP_4	GO:0044267~cellular protein metabolic process	38	34.2342	0.00918338	FBGN0003716, FBGN0000490, FBGN0001075, FBGN0004647, FBGN0011817, FBGN0000497, FBGN0004644, FBGN0002069, FBGN0001291, FBGN0261617, FBGN0003079, FBGN0003731, FBGN0002121, FBGN0013263, FBGN0000229, FBGN0010382, FBGN0053554, FBGN0003256, FBGN0027053, FBGN0003371, FBGN0000320, FBGN0014020, FBGN0003053, FBGN0033483, FBGN0005592, FBGN0015509, FBGN0010333, FBGN0011591, FBGN0003997, FBGN0011829, FBGN00300…	111	2430	10386	1.4632	0.999949	0.0262359	13.6755
GOTERM_BP_4	GO:0043085~positive regulation of catalytic activity	7	6.30631	0.0103537	FBGN0011706, FBGN0005592, FBGN0010909, FBGN0010333, FBGN0003997, FBGN0003041, FBGN0014020	111	174	10386	3.76421	0.999986	0.0290847	15.2865
GOTERM_BP_4	GO:0019538~protein metabolic process	40	36.036	0.0509501	FBGN0003716, FBGN0000490, FBGN0001075, FBGN0004647, FBGN0011817, FBGN0000497, FBGN0004644, FBGN0002069, FBGN0001291, FBGN0261617, FBGN0003079, FBGN0003731, FBGN0002121, FBGN0013263, FBGN0000229, FBGN0010382, FBGN0053554, FBGN0003256, FBGN0027053, FBGN0003371, FBGN0000320, FBGN0014020, FBGN0003053, FBGN0033483, FBGN0005592, FBGN0015509, FBGN0010333, FBGN0011591, FBGN0003997, FBGN0011829, FBGN00300…	111	2902	10386	1.2897	1	0.12495	56.5495
Annotation Cluster 29	Enrichment Score: 5.26895916342078
Category	Term	Count	%	PValue	Genes	List Total	Pop Hits	Pop Total	Fold Enrichment	Bonferroni	Benjamini	FDR
GOTERM_BP_4	GO:0010927~cellular component assembly involved in morphogenesis	14	12.6126	7.13417e-07	FBGN0000490, FBGN0025641, FBGN0004657, FBGN0011766, FBGN0010333, FBGN0004647, FBGN0011763, FBGN0004644, FBGN0001291, FBGN0003731, FBGN0000229, FBGN0010382, FBGN0265434, FBGN0014020	111	226	10386	5.79622	0.000764491	3.67684e-06	0.00113716
GOTERM_BP_4	GO:0007304~chorion-containing eggshell formation	11	9.90991	2.00199e-06	FBGN0001291, FBGN0003716, FBGN0000490, FBGN0003731, FBGN0003205, FBGN0000229, FBGN0011766, FBGN0010382, FBGN0010333, FBGN0004647, FBGN0011763	111	139	10386	7.40463	0.00214383	9.93576e-06	0.00319106
GOTERM_BP_4	GO:0030703~eggshell formation	11	9.90991	2.28005e-06	FBGN0001291, FBGN0003716, FBGN0000490, FBGN0003731, FBGN0003205, FBGN0000229, FBGN0011766, FBGN0010382, FBGN0010333, FBGN0004647, FBGN0011763	111	141	10386	7.2996	0.00244123	1.10597e-05	0.00363426
GOTERM_BP_4	GO:0007306~eggshell chorion assembly	9	8.10811	5.45397e-06	FBGN0001291, FBGN0000490, FBGN0003731, FBGN0000229, FBGN0011766, FBGN0010382, FBGN0010333, FBGN0004647, FBGN0011763	111	92	10386	9.15335	0.00582961	2.57559e-05	0.0086931
GOTERM_BP_4	GO:0046843~dorsal appendage formation	6	5.40541	0.000254532	FBGN0001291, FBGN0000490, FBGN0003731, FBGN0000229, FBGN0010333, FBGN0004647	111	54	10386	10.3964	0.238826	0.000903212	0.404946
Annotation Cluster 30	Enrichment Score: 5.0602705379347395
Category	Term	Count	%	PValue	Genes	List Total	Pop Hits	Pop Total	Fold Enrichment	Bonferroni	Benjamini	FDR
GOTERM_BP_4	GO:0012501~programmed cell death	22	19.8198	2.76558e-10	FBGN0033483, FBGN0002781, FBGN0000490, FBGN0000117, FBGN0015509, FBGN0011766, FBGN0003997, FBGN0004647, FBGN0011763, FBGN0004009, FBGN0011706, FBGN0000463, FBGN0003079, FBGN0002576, FBGN0003731, FBGN0003205, FBGN0002121, FBGN0030941, FBGN0003892, FBGN0010382, FBGN0003256, FBGN0000320	111	374	10386	5.50397	2.9647e-07	2.08782e-09	4.40825e-07
GOTERM_BP_4	GO:0043067~regulation of programmed cell death	16	14.4144	8.98089e-09	FBGN0000490, FBGN0015509, FBGN0011766, FBGN0003997, FBGN0011763, FBGN0004009, FBGN0011706, FBGN0003079, FBGN0002576, FBGN0003731, FBGN0003205, FBGN0002121, FBGN0010382, FBGN0003892, FBGN0003256, FBGN0000320	111	219	10386	6.83599	9.62746e-06	5.83485e-08	1.43153e-05
GOTERM_BP_4	GO:0010623~programmed cell death involved in cell development	13	11.7117	9.83557e-08	FBGN0004009, FBGN0011706, FBGN0000463, FBGN0002576, FBGN0000490, FBGN0003731, FBGN0003205, FBGN0002121, FBGN0000117, FBGN0011766, FBGN0004647, FBGN0003997, FBGN0011763	111	158	10386	7.6986	0.000105432	5.63836e-07	0.000156776
GOTERM_BP_4	GO:0043068~positive regulation of programmed cell death	8	7.20721	2.25143e-05	FBGN0004009, FBGN0011706, FBGN0002576, FBGN0002121, FBGN0011766, FBGN0010382, FBGN0003997, FBGN0011763	111	81	10386	9.24124	0.0238467	9.2825e-05	0.0358811
GOTERM_BP_4	GO:0010942~positive regulation of cell death	8	7.20721	4.1621e-05	FBGN0004009, FBGN0011706, FBGN0002576, FBGN0002121, FBGN0011766, FBGN0010382, FBGN0003997, FBGN0011763	111	89	10386	8.41057	0.0436379	0.000162237	0.0663221
GOTERM_BP_4	GO:0045476~nurse cell apoptotic process	5	4.5045	5.0641e-05	FBGN0011706, FBGN0000490, FBGN0011766, FBGN0003997, FBGN0011763	111	20	10386	23.3919	0.0528412	0.000195968	0.0806897
GOTERM_BP_4	GO:0007307~eggshell chorion gene amplification	3	2.7027	0.0204734	FBGN0011766, FBGN0010382, FBGN0011763	111	21	10386	13.3668	1	0.0545931	28.0879
GOTERM_BP_4	GO:0006259~DNA metabolic process	7	6.30631	0.138825	FBGN0004009, FBGN0011715, FBGN0011766, FBGN0053554, FBGN0010382, FBGN0011763, FBGN0000320	111	331	10386	1.97877	1	0.303485	90.7662
Annotation Cluster 31	Enrichment Score: 4.9867308155940195
Category	Term	Count	%	PValue	Genes	List Total	Pop Hits	Pop Total	Fold Enrichment	Bonferroni	Benjamini	FDR
GOTERM_BP_4	GO:0010454~negative regulation of cell fate commitment	9	8.10811	7.81952e-11	FBGN0000499, FBGN0014388, FBGN0004009, FBGN0000463, FBGN0000606, FBGN0000097, FBGN0000117, FBGN0004647, FBGN0000320	111	24	10386	35.0878	8.38253e-08	6.25562e-10	1.24641e-07
GOTERM_BP_4	GO:0010453~regulation of cell fate commitment	10	9.00901	1.16926e-10	FBGN0000499, FBGN0014388, FBGN0004009, FBGN0000463, FBGN0000606, FBGN0000097, FBGN0000117, FBGN0004647, FBGN0005561, FBGN0000320	111	37	10386	25.2885	1.25345e-07	9.28479e-10	1.86377e-07
GOTERM_BP_4	GO:0003007~heart morphogenesis	9	8.10811	1.76828e-09	FBGN0004644, FBGN0000499, FBGN0003391, FBGN0004009, FBGN0000606, FBGN0264089, FBGN0005631, FBGN0000117, FBGN0002643	111	34	10386	24.7679	1.89559e-06	1.25536e-08	2.81858e-06
UP_KEYWORDS	Segmentation polarity protein	6	5.40541	5.17185e-07	FBGN0004644, FBGN0000499, FBGN0004009, FBGN0000117, FBGN0003892, FBGN0003371	111	21	13921	35.8327	6.4646e-05	4.61771e-06	0.000598077
GOTERM_BP_4	GO:0035051~cardiocyte differentiation	7	6.30631	5.94134e-07	FBGN0000499, FBGN0004009, FBGN0000606, FBGN0000490, FBGN0000117, FBGN0004647, FBGN0003117	111	30	10386	21.8324	0.000636709	3.10688e-06	0.000947028
UP_KEYWORDS	Wnt signaling pathway	7	6.30631	8.83134e-07	FBGN0000499, FBGN0026597, FBGN0004009, FBGN0016797, FBGN0001085, FBGN0000117, FBGN0002945	111	42	13921	20.9024	0.000110386	7.35943e-06	0.00102126
GOTERM_BP_4	GO:1905207~regulation of cardiocyte differentiation	5	4.5045	1.44097e-06	FBGN0000499, FBGN0004009, FBGN0000606, FBGN0000117, FBGN0004647	111	9	10386	51.982	0.00154353	7.18472e-06	0.00229684
GOTERM_BP_4	GO:0060914~heart formation	4	3.6036	2.25917e-05	FBGN0004644, FBGN0000499, FBGN0004009, FBGN0000117	111	6	10386	62.3784	0.0239277	9.27872e-05	0.0360044
GOTERM_BP_4	GO:0035155~negative regulation of terminal cell fate specification, open tracheal system	4	3.6036	2.25917e-05	FBGN0014388, FBGN0000463, FBGN0000097, FBGN0004647	111	6	10386	62.3784	0.0239277	9.27872e-05	0.0360044
GOTERM_BP_4	GO:1905208~negative regulation of cardiocyte differentiation	4	3.6036	3.92303e-05	FBGN0000499, FBGN0004009, FBGN0000606, FBGN0000117	111	7	10386	53.4672	0.0411836	0.000154605	0.0625136
GOTERM_BP_4	GO:2000044~negative regulation of cardiac cell fate specification	4	3.6036	3.92303e-05	FBGN0000499, FBGN0004009, FBGN0000606, FBGN0000117	111	7	10386	53.4672	0.0411836	0.000154605	0.0625136
GOTERM_BP_4	GO:0051892~negative regulation of cardioblast differentiation	4	3.6036	3.92303e-05	FBGN0000499, FBGN0004009, FBGN0000606, FBGN0000117	111	7	10386	53.4672	0.0411836	0.000154605	0.0625136
GOTERM_BP_4	GO:2000736~regulation of stem cell differentiation	5	4.5045	0.000264009	FBGN0000499, FBGN0004009, FBGN0000606, FBGN0000117, FBGN0004647	111	30	10386	15.5946	0.246521	0.000933737	0.419993
GOTERM_BP_4	GO:0003129~heart induction	3	2.7027	0.00033118	FBGN0000499, FBGN0004009, FBGN0000117	111	3	10386	93.5676	0.298885	0.00115973	0.526587
GOTERM_BP_4	GO:0003306~Wnt signaling pathway involved in heart development	3	2.7027	0.00033118	FBGN0000499, FBGN0004009, FBGN0000117	111	3	10386	93.5676	0.298885	0.00115973	0.526587
GOTERM_BP_4	GO:0061311~cell surface receptor signaling pathway involved in heart development	3	2.7027	0.00033118	FBGN0000499, FBGN0004009, FBGN0000117	111	3	10386	93.5676	0.298885	0.00115973	0.526587
GOTERM_BP_4	GO:0061316~canonical Wnt signaling pathway involved in heart development	3	2.7027	0.00033118	FBGN0000499, FBGN0004009, FBGN0000117	111	3	10386	93.5676	0.298885	0.00115973	0.526587
GOTERM_BP_4	GO:0003136~negative regulation of heart induction by canonical Wnt signaling pathway	3	2.7027	0.00033118	FBGN0000499, FBGN0004009, FBGN0000117	111	3	10386	93.5676	0.298885	0.00115973	0.526587
GOTERM_BP_4	GO:0001759~organ induction	3	2.7027	0.00033118	FBGN0000499, FBGN0004009, FBGN0000117	111	3	10386	93.5676	0.298885	0.00115973	0.526587
GOTERM_BP_4	GO:1901320~negative regulation of heart induction	3	2.7027	0.00033118	FBGN0000499, FBGN0004009, FBGN0000117	111	3	10386	93.5676	0.298885	0.00115973	0.526587
GOTERM_BP_4	GO:2000737~negative regulation of stem cell differentiation	4	3.6036	0.000386493	FBGN0000499, FBGN0004009, FBGN0000606, FBGN0000117	111	14	10386	26.7336	0.339263	0.00134455	0.614282
GOTERM_BP_4	GO:0010092~specification of organ identity	3	2.7027	0.00225475	FBGN0000499, FBGN0004009, FBGN0000117	111	7	10386	40.1004	0.911063	0.00705054	3.53411
Annotation Cluster 32	Enrichment Score: 4.715554540878097
Category	Term	Count	%	PValue	Genes	List Total	Pop Hits	Pop Total	Fold Enrichment	Bonferroni	Benjamini	FDR
GOTERM_BP_4	GO:0007398~ectoderm development	8	7.20721	1.58839e-08	FBGN0004644, FBGN0004009, FBGN0003053, FBGN0000463, FBGN0000490, FBGN0004647, FBGN0003117, FBGN0002643	111	29	10386	25.8117	1.70274e-05	9.95764e-08	2.53185e-05
GOTERM_BP_4	GO:0007446~imaginal disc growth	7	6.30631	4.73433e-06	FBGN0004644, FBGN0004009, FBGN0263289, FBGN0262029, FBGN0000490, FBGN0001075, FBGN0004647	111	42	10386	15.5946	0.00506236	2.25563e-05	0.00754612
GOTERM_BP_4	GO:0035265~organ growth	8	7.20721	7.75293e-06	FBGN0004644, FBGN0004009, FBGN0263289, FBGN0003716, FBGN0262029, FBGN0000490, FBGN0001075, FBGN0004647	111	69	10386	10.8484	0.00827673	3.52162e-05	0.0123572
GOTERM_BP_4	GO:0046620~regulation of organ growth	7	6.30631	3.51423e-05	FBGN0004644, FBGN0263289, FBGN0003716, FBGN0262029, FBGN0000490, FBGN0001075, FBGN0003997	111	59	10386	11.1012	0.0369724	0.000141088	0.056001
GOTERM_BP_4	GO:0045570~regulation of imaginal disc growth	5	4.5045	0.000432455	FBGN0263289, FBGN0003716, FBGN0262029, FBGN0000490, FBGN0001075	111	34	10386	13.7599	0.371043	0.0014995	0.687098
GOTERM_BP_4	GO:0007440~foregut morphogenesis	3	2.7027	0.00574406	FBGN0004644, FBGN0000490, FBGN0004647	111	11	10386	25.5184	0.99792	0.0168682	8.77329
Annotation Cluster 33	Enrichment Score: 4.653657772244686
Category	Term	Count	%	PValue	Genes	List Total	Pop Hits	Pop Total	Fold Enrichment	Bonferroni	Benjamini	FDR
KEGG_PATHWAY	dme04330:Notch signaling pathway	7	6.30631	1.08642e-06	FBGN0000499, FBGN0000463, FBGN0261617, FBGN0011591, FBGN0004647, FBGN0002643, FBGN0001169	48	22	2752	18.2424	3.25922e-05	1.08642e-05	0.000925461
GOTERM_BP_4	GO:0008407~chaeta morphogenesis	7	6.30631	1.05187e-05	FBGN0000499, FBGN0000463, FBGN0016797, FBGN0004647, FBGN0003117, FBGN0002643, FBGN0003371	111	48	10386	13.6453	0.0112127	4.62124e-05	0.0167651
GOTERM_BP_4	GO:0022416~chaeta development	8	7.20721	0.000106003	FBGN0000499, FBGN0003415, FBGN0000463, FBGN0016797, FBGN0004647, FBGN0003117, FBGN0002643, FBGN0003371	111	103	10386	7.26738	0.107422	0.000395886	0.168833
GOTERM_BP_4	GO:0035285~appendage segmentation	5	4.5045	0.000200488	FBGN0000499, FBGN0003415, FBGN0000463, FBGN0011591, FBGN0004647	111	28	10386	16.7085	0.193414	0.000716225	0.319093
Annotation Cluster 34	Enrichment Score: 4.328260880656505
Category	Term	Count	%	PValue	Genes	List Total	Pop Hits	Pop Total	Fold Enrichment	Bonferroni	Benjamini	FDR
GOTERM_BP_4	GO:0007392~initiation of dorsal closure	7	6.30631	1.38502e-08	FBGN0000499, FBGN0004009, FBGN0003053, FBGN0000490, FBGN0010333, FBGN0014020, FBGN0265434	111	17	10386	38.5278	1.48473e-05	8.73377e-08	2.20768e-05
GOTERM_BP_4	GO:0009826~unidimensional cell growth	6	5.40541	6.8012e-07	FBGN0000499, FBGN0004009, FBGN0003716, FBGN0023172, FBGN0010333, FBGN0014020	111	17	10386	33.0238	0.000728823	3.52216e-06	0.00108408
GOTERM_BP_4	GO:0016476~regulation of embryonic cell shape	6	5.40541	1.95018e-05	FBGN0000499, FBGN0004009, FBGN0010909, FBGN0023172, FBGN0010333, FBGN0014020	111	32	10386	17.5439	0.0206891	8.16613e-05	0.0310808
GOTERM_BP_4	GO:0045995~regulation of embryonic development	7	6.30631	0.00035057	FBGN0000499, FBGN0004009, FBGN0004875, FBGN0010909, FBGN0023172, FBGN0010333, FBGN0014020	111	89	10386	7.35925	0.313313	0.0012236	0.557336
GOTERM_BP_4	GO:0007394~dorsal closure, elongation of leading edge cells	3	2.7027	0.00684542	FBGN0000499, FBGN0004009, FBGN0010333	111	12	10386	23.3919	0.999366	0.0198642	10.3708
GOTERM_BP_4	GO:0097581~lamellipodium organization	3	2.7027	0.0243301	FBGN0000499, FBGN0004009, FBGN0010333	111	23	10386	12.2045	1	0.0643462	32.4708
Annotation Cluster 35	Enrichment Score: 4.027253140977643
Category	Term	Count	%	PValue	Genes	List Total	Pop Hits	Pop Total	Fold Enrichment	Bonferroni	Benjamini	FDR
GOTERM_BP_4	GO:0030031~cell projection assembly	12	10.8108	2.28476e-07	FBGN0004644, FBGN0000499, FBGN0003391, FBGN0004009, FBGN0005592, FBGN0003731, FBGN0004657, FBGN0025641, FBGN0010333, FBGN0013733, FBGN0004647, FBGN0014020	111	139	10386	8.07778	0.000244896	1.25603e-06	0.000364183
GOTERM_BP_4	GO:0051017~actin filament bundle assembly	6	5.40541	9.84412e-06	FBGN0004009, FBGN0026181, FBGN0004657, FBGN0025641, FBGN0010333, FBGN0014020	111	28	10386	20.0502	0.0104975	4.36063e-05	0.0156901
GOTERM_BP_4	GO:0061572~actin filament bundle organization	6	5.40541	1.95018e-05	FBGN0004009, FBGN0026181, FBGN0004657, FBGN0025641, FBGN0010333, FBGN0014020	111	32	10386	17.5439	0.0206891	8.16613e-05	0.0310808
GOTERM_BP_4	GO:0051489~regulation of filopodium assembly	5	4.5045	0.000148794	FBGN0025641, FBGN0010333, FBGN0013733, FBGN0004647, FBGN0014020	111	26	10386	17.9938	0.147446	0.000546149	0.23691
GOTERM_BP_4	GO:0060491~regulation of cell projection assembly	5	4.5045	0.000432455	FBGN0025641, FBGN0010333, FBGN0013733, FBGN0004647, FBGN0014020	111	34	10386	13.7599	0.371043	0.0014995	0.687098
GOTERM_BP_4	GO:0031346~positive regulation of cell projection organization	5	4.5045	0.00188602	FBGN0000499, FBGN0001085, FBGN0025641, FBGN0010333, FBGN0013733	111	50	10386	9.35676	0.867837	0.00596945	2.96427
GOTERM_BP_4	GO:0051491~positive regulation of filopodium assembly	3	2.7027	0.0121077	FBGN0025641, FBGN0010333, FBGN0013733	111	16	10386	17.5439	0.999998	0.03335	17.6483
Annotation Cluster 36	Enrichment Score: 3.783530537749516
Category	Term	Count	%	PValue	Genes	List Total	Pop Hits	Pop Total	Fold Enrichment	Bonferroni	Benjamini	FDR
GOTERM_BP_4	GO:0035160~maintenance of epithelial integrity, open tracheal system	5	4.5045	5.52358e-06	FBGN0003391, FBGN0003053, FBGN0003731, FBGN0004657, FBGN0004635	111	12	10386	38.9865	0.0059038	2.58569e-05	0.00880406
GOTERM_BP_4	GO:0060249~anatomical structure homeostasis	10	9.00901	3.74127e-05	FBGN0003391, FBGN0003053, FBGN0260003, FBGN0033483, FBGN0005631, FBGN0003731, FBGN0004657, FBGN0030941, FBGN0004647, FBGN0004635	111	155	10386	6.03662	0.0393135	0.000147986	0.059618
GOTERM_BP_4	GO:0048871~multicellular organismal homeostasis	6	5.40541	0.000908764	FBGN0003391, FBGN0003053, FBGN0003731, FBGN0004657, FBGN0004635, FBGN0010415	111	71	10386	7.90712	0.622671	0.00301291	1.43875
GOTERM_BP_4	GO:0001894~tissue homeostasis	5	4.5045	0.00391009	FBGN0003391, FBGN0003053, FBGN0003731, FBGN0004657, FBGN0004635	111	61	10386	7.66947	0.985002	0.011728	6.05379
Annotation Cluster 37	Enrichment Score: 3.7775768442565476
Category	Term	Count	%	PValue	Genes	List Total	Pop Hits	Pop Total	Fold Enrichment	Bonferroni	Benjamini	FDR
KEGG_PATHWAY	dme04350:TGF-beta signaling pathway	8	7.20721	1.53635e-06	FBGN0011648, FBGN0003716, FBGN0026181, FBGN0261617, FBGN0000490, FBGN0015509, FBGN0003256, FBGN0014020	48	36	2752	12.7407	4.60895e-05	1.15226e-05	0.00130872
GOTERM_BP_4	GO:0042078~germ-line stem cell division	7	6.30631	6.26226e-06	FBGN0004644, FBGN0000928, FBGN0011648, FBGN0003391, FBGN0003716, FBGN0000490, FBGN0003892	111	44	10386	14.8857	0.00669068	2.90609e-05	0.00998139
GOTERM_BP_4	GO:0017145~stem cell division	9	8.10811	7.50235e-06	FBGN0004644, FBGN0000928, FBGN0011648, FBGN0003391, FBGN0003716, FBGN0000490, FBGN0002121, FBGN0003892, FBGN0265434	111	96	10386	8.77196	0.0080103	3.43693e-05	0.0119579
GOTERM_BP_4	GO:0070848~response to growth factor	8	7.20721	2.25143e-05	FBGN0004644, FBGN0014388, FBGN0011648, FBGN0003716, FBGN0005592, FBGN0000490, FBGN0002121, FBGN0003117	111	81	10386	9.24124	0.0238467	9.2825e-05	0.0358811
GOTERM_BP_4	GO:0001704~formation of primary germ layer	6	5.40541	3.52992e-05	FBGN0011648, FBGN0003716, FBGN0264089, FBGN0000490, FBGN0003041, FBGN0002643	111	36	10386	15.5946	0.0371344	0.00014119	0.0562511
GOTERM_BP_4	GO:0071560~cellular response to transforming growth factor beta stimulus	5	4.5045	0.000173253	FBGN0011648, FBGN0003716, FBGN0000490, FBGN0002121, FBGN0003117	111	27	10386	17.3273	0.169513	0.000627315	0.275803
GOTERM_BP_4	GO:0071310~cellular response to organic substance	11	9.90991	0.000476891	FBGN0261239, FBGN0004644, FBGN0014388, FBGN0011648, FBGN0001291, FBGN0003716, FBGN0005592, FBGN0000490, FBGN0015509, FBGN0002121, FBGN0003117	111	264	10386	3.89865	0.400314	0.00164815	0.757448
GOTERM_BP_4	GO:0060795~cell fate commitment involved in formation of primary germ layer	4	3.6036	0.00115571	FBGN0011648, FBGN0003716, FBGN0000490, FBGN0002643	111	20	10386	18.7135	0.710511	0.00377226	1.82635
GOTERM_BP_4	GO:0045705~negative regulation of salivary gland boundary specification	3	2.7027	0.00298558	FBGN0011648, FBGN0003716, FBGN0000490	111	8	10386	35.0878	0.959454	0.00909041	4.65424
GOTERM_BP_4	GO:0060326~cell chemotaxis	3	2.7027	0.00381211	FBGN0004644, FBGN0011648, FBGN0000490	111	9	10386	31.1892	0.983334	0.0114672	5.90639
GOTERM_BP_4	GO:0071773~cellular response to BMP stimulus	3	2.7027	0.0448608	FBGN0011648, FBGN0003716, FBGN0000490	111	32	10386	8.77196	1	0.111549	51.8863
Annotation Cluster 38	Enrichment Score: 3.7661313110719785
Category	Term	Count	%	PValue	Genes	List Total	Pop Hits	Pop Total	Fold Enrichment	Bonferroni	Benjamini	FDR
GOTERM_BP_4	GO:0097190~apoptotic signaling pathway	8	7.20721	2.90307e-07	FBGN0011706, FBGN0033483, FBGN0003079, FBGN0003731, FBGN0003205, FBGN0003997, FBGN0011763, FBGN0000320	111	43	10386	17.4079	0.000311161	1.57176e-06	0.000462739
GOTERM_BP_4	GO:0060548~negative regulation of cell death	9	8.10811	3.62865e-05	FBGN0004009, FBGN0011706, FBGN0003079, FBGN0003731, FBGN0003205, FBGN0015509, FBGN0266579, FBGN0003256, FBGN0000320	111	119	10386	7.07654	0.038153	0.000144599	0.057824
GOTERM_BP_4	GO:2001234~negative regulation of apoptotic signaling pathway	4	3.6036	9.27058e-05	FBGN0003079, FBGN0003731, FBGN0003205, FBGN0000320	111	9	10386	41.5856	0.0946062	0.000349887	0.147668
GOTERM_BP_4	GO:0043069~negative regulation of programmed cell death	8	7.20721	9.36279e-05	FBGN0004009, FBGN0011706, FBGN0003079, FBGN0003731, FBGN0003205, FBGN0015509, FBGN0003256, FBGN0000320	111	101	10386	7.41129	0.0955007	0.000352127	0.149136
GOTERM_BP_4	GO:2001233~regulation of apoptotic signaling pathway	4	3.6036	0.00115571	FBGN0003079, FBGN0003731, FBGN0003205, FBGN0000320	111	20	10386	18.7135	0.710511	0.00377226	1.82635
GOTERM_BP_4	GO:0048232~male gamete generation	6	5.40541	0.239468	FBGN0003079, FBGN0003731, FBGN0013263, FBGN0027053, FBGN0001233, FBGN0000320	111	314	10386	1.78792	1	0.476796	98.7264
Annotation Cluster 39	Enrichment Score: 3.6841278037429666
Category	Term	Count	%	PValue	Genes	List Total	Pop Hits	Pop Total	Fold Enrichment	Bonferroni	Benjamini	FDR
GOTERM_BP_4	GO:0009967~positive regulation of signal transduction	14	12.6126	2.13213e-05	FBGN0003415, FBGN0005592, FBGN0000490, FBGN0004647, FBGN0004635, FBGN0004644, FBGN0003079, FBGN0035574, FBGN0003205, FBGN0010909, FBGN0023172, FBGN0053554, FBGN0003256, FBGN0000212	111	308	10386	4.25307	0.0225974	8.82458e-05	0.0339801
GOTERM_BP_4	GO:0010647~positive regulation of cell communication	14	12.6126	5.607e-05	FBGN0003415, FBGN0005592, FBGN0000490, FBGN0004647, FBGN0004635, FBGN0004644, FBGN0003079, FBGN0035574, FBGN0003205, FBGN0010909, FBGN0023172, FBGN0053554, FBGN0003256, FBGN0000212	111	338	10386	3.87558	0.0583379	0.00021542	0.0893365
GOTERM_BP_4	GO:1902533~positive regulation of intracellular signal transduction	7	6.30631	0.00741434	FBGN0003079, FBGN0035574, FBGN0005592, FBGN0003205, FBGN0010909, FBGN0023172, FBGN0003256	111	162	10386	4.04304	0.999657	0.021388	11.1857
Annotation Cluster 40	Enrichment Score: 3.6353120732337825
Category	Term	Count	%	PValue	Genes	List Total	Pop Hits	Pop Total	Fold Enrichment	Bonferroni	Benjamini	FDR
GOTERM_BP_4	GO:0044843~cell cycle G1/S phase transition	8	7.20721	5.24149e-08	FBGN0002783, FBGN0011648, FBGN0003731, FBGN0003205, FBGN0011766, FBGN0010382, FBGN0004647, FBGN0000212	111	34	10386	22.0159	5.61872e-05	3.15668e-07	8.35478e-05
GOTERM_BP_4	GO:0007346~regulation of mitotic cell cycle	14	12.6126	6.78318e-07	FBGN0002783, FBGN0011648, FBGN0015509, FBGN0004647, FBGN0004644, FBGN0004009, FBGN0000463, FBGN0261617, FBGN0003731, FBGN0010382, FBGN0003892, FBGN0027053, FBGN0003371, FBGN0000212	111	225	10386	5.82198	0.000726893	3.52988e-06	0.00108121
GOTERM_BP_4	GO:0044772~mitotic cell cycle phase transition	11	9.90991	8.84106e-06	FBGN0002783, FBGN0011648, FBGN0003731, FBGN0003205, FBGN0015509, FBGN0011766, FBGN0010382, FBGN0004647, FBGN0027053, FBGN0000212, FBGN0003371	111	164	10386	6.27587	0.00943288	3.94895e-05	0.0140914
GOTERM_BP_4	GO:0010564~regulation of cell cycle process	11	9.90991	6.07438e-05	FBGN0002783, FBGN0011648, FBGN0004009, FBGN0261617, FBGN0003731, FBGN0015509, FBGN0010382, FBGN0004647, FBGN0027053, FBGN0000212, FBGN0003371	111	205	10386	5.0207	0.0630443	0.000232542	0.0967798
GOTERM_BP_4	GO:1901987~regulation of cell cycle phase transition	9	8.10811	0.000153963	FBGN0002783, FBGN0011648, FBGN0003731, FBGN0015509, FBGN0010382, FBGN0004647, FBGN0027053, FBGN0000212, FBGN0003371	111	146	10386	5.76786	0.152158	0.000561275	0.245131
GOTERM_BP_4	GO:0010948~negative regulation of cell cycle process	7	6.30631	0.00184048	FBGN0002783, FBGN0011648, FBGN0004009, FBGN0003731, FBGN0015509, FBGN0027053, FBGN0000212	111	122	10386	5.36863	0.861212	0.00584283	2.89367
GOTERM_BP_4	GO:1901988~negative regulation of cell cycle phase transition	6	5.40541	0.00549665	FBGN0002783, FBGN0011648, FBGN0003731, FBGN0015509, FBGN0027053, FBGN0000212	111	107	10386	5.24678	0.997284	0.0161898	8.41078
GOTERM_BP_4	GO:0045786~negative regulation of cell cycle	7	6.30631	0.00582586	FBGN0002783, FBGN0011648, FBGN0004009, FBGN0003731, FBGN0015509, FBGN0027053, FBGN0000212	111	154	10386	4.25307	0.998096	0.0170605	8.89286
GOTERM_BP_4	GO:0045930~negative regulation of mitotic cell cycle	6	5.40541	0.00946468	FBGN0002783, FBGN0011648, FBGN0003731, FBGN0015509, FBGN0027053, FBGN0000212	111	122	10386	4.60168	0.999963	0.0267487	14.0653
GOTERM_BP_4	GO:0044839~cell cycle G2/M phase transition	3	2.7027	0.270442	FBGN0003731, FBGN0015509, FBGN0027053	111	96	10386	2.92399	1	0.523491	99.3435
Annotation Cluster 41	Enrichment Score: 3.596364580916604
Category	Term	Count	%	PValue	Genes	List Total	Pop Hits	Pop Total	Fold Enrichment	Bonferroni	Benjamini	FDR
GOTERM_BP_4	GO:0022407~regulation of cell-cell adhesion	7	6.30631	3.03936e-07	FBGN0003053, FBGN0003716, FBGN0264089, FBGN0005631, FBGN0000097, FBGN0000117, FBGN0004647	111	27	10386	24.2583	0.000325766	1.63728e-06	0.000484463
GOTERM_BP_4	GO:0022408~negative regulation of cell-cell adhesion	3	2.7027	0.00574406	FBGN0000097, FBGN0000117, FBGN0004647	111	11	10386	25.5184	0.99792	0.0168682	8.77329
GOTERM_BP_4	GO:0007162~negative regulation of cell adhesion	3	2.7027	0.00930906	FBGN0000097, FBGN0000117, FBGN0004647	111	14	10386	20.0502	0.999956	0.0264515	13.8499
Annotation Cluster 42	Enrichment Score: 3.5761697280246127
Category	Term	Count	%	PValue	Genes	List Total	Pop Hits	Pop Total	Fold Enrichment	Bonferroni	Benjamini	FDR
GOTERM_BP_4	GO:0048639~positive regulation of developmental growth	10	9.00901	2.12736e-06	FBGN0000499, FBGN0011648, FBGN0003716, FBGN0262029, FBGN0005592, FBGN0001085, FBGN0010333, FBGN0013733, FBGN0011817, FBGN0010415	111	109	10386	8.58418	0.00227794	1.04134e-05	0.0033909
GOTERM_BP_4	GO:0051130~positive regulation of cellular component organization	13	11.7117	1.16583e-05	FBGN0000499, FBGN0011648, FBGN0003716, FBGN0026181, FBGN0001085, FBGN0013263, FBGN0025641, FBGN0010333, FBGN0013733, FBGN0030057, FBGN0011817, FBGN0003371, FBGN0010415	111	248	10386	4.90475	0.01242	5.10098e-05	0.0185813
GOTERM_BP_4	GO:0007416~synapse assembly	11	9.90991	3.64166e-05	FBGN0000635, FBGN0011648, FBGN0004009, FBGN0001291, FBGN0003716, FBGN0261617, FBGN0266521, FBGN0011817, FBGN0034789, FBGN0003371, FBGN0010415	111	193	10386	5.33287	0.0382871	0.00014458	0.0580311
GOTERM_BP_4	GO:0007528~neuromuscular junction development	10	9.00901	9.61757e-05	FBGN0000635, FBGN0011648, FBGN0004009, FBGN0001291, FBGN0003716, FBGN0266521, FBGN0011817, FBGN0034789, FBGN0003371, FBGN0010415	111	175	10386	5.34672	0.097968	0.000360443	0.153191
GOTERM_BP_4	GO:0044089~positive regulation of cellular component biogenesis	8	7.20721	0.00015134	FBGN0011648, FBGN0003716, FBGN0026181, FBGN0025641, FBGN0010333, FBGN0013733, FBGN0011817, FBGN0010415	111	109	10386	6.86734	0.14977	0.000553596	0.240958
GOTERM_BP_4	GO:0051963~regulation of synapse assembly	8	7.20721	0.000160231	FBGN0000635, FBGN0011648, FBGN0003716, FBGN0010333, FBGN0011817, FBGN0034789, FBGN0003371, FBGN0010415	111	110	10386	6.80491	0.157837	0.000582141	0.255098
GOTERM_BP_4	GO:0051124~synaptic growth at neuromuscular junction	8	7.20721	0.000189477	FBGN0011648, FBGN0004009, FBGN0001291, FBGN0003716, FBGN0266521, FBGN0011817, FBGN0003371, FBGN0010415	111	113	10386	6.62425	0.183835	0.000681439	0.301593
GOTERM_BP_4	GO:0050807~regulation of synapse organization	8	7.20721	0.000697622	FBGN0000635, FBGN0011648, FBGN0003716, FBGN0010333, FBGN0011817, FBGN0034789, FBGN0003371, FBGN0010415	111	140	10386	5.34672	0.526741	0.00235719	1.10621
GOTERM_BP_4	GO:0008582~regulation of synaptic growth at neuromuscular junction	7	6.30631	0.000846937	FBGN0000635, FBGN0011648, FBGN0003716, FBGN0011817, FBGN0034789, FBGN0003371, FBGN0010415	111	105	10386	6.23784	0.596791	0.0028256	1.34148
GOTERM_BP_4	GO:0031346~positive regulation of cell projection organization	5	4.5045	0.00188602	FBGN0000499, FBGN0001085, FBGN0025641, FBGN0010333, FBGN0013733	111	50	10386	9.35676	0.867837	0.00596945	2.96427
GOTERM_BP_4	GO:1904398~positive regulation of neuromuscular junction development	4	3.6036	0.00381157	FBGN0011648, FBGN0003716, FBGN0011817, FBGN0010415	111	30	10386	12.4757	0.983324	0.0114978	5.90557
GOTERM_BP_4	GO:0045887~positive regulation of synaptic growth at neuromuscular junction	4	3.6036	0.00381157	FBGN0011648, FBGN0003716, FBGN0011817, FBGN0010415	111	30	10386	12.4757	0.983324	0.0114978	5.90557
GOTERM_BP_4	GO:0051965~positive regulation of synapse assembly	4	3.6036	0.00500579	FBGN0011648, FBGN0003716, FBGN0011817, FBGN0010415	111	33	10386	11.3415	0.995391	0.0148325	7.68755
Annotation Cluster 43	Enrichment Score: 3.523003417331506
Category	Term	Count	%	PValue	Genes	List Total	Pop Hits	Pop Total	Fold Enrichment	Bonferroni	Benjamini	FDR
UP_KEYWORDS	Zinc	17	15.3153	1.79903e-05	FBGN0011648, FBGN0003053, FBGN0003567, FBGN0262955, FBGN0002781, FBGN0004861, FBGN0261239, FBGN0260003, FBGN0026181, FBGN0003079, FBGN0261617, FBGN0013263, FBGN0033636, FBGN0023172, FBGN0027053, FBGN0003117, FBGN0002945	111	598	13921	3.56529	0.00224629	0.000112434	0.0208023
UP_KEYWORDS	Zinc-finger	13	11.7117	5.03749e-05	FBGN0003053, FBGN0003567, FBGN0262955, FBGN0002781, FBGN0004861, FBGN0261239, FBGN0260003, FBGN0026181, FBGN0003079, FBGN0261617, FBGN0013263, FBGN0033636, FBGN0003117	111	384	13921	4.2458	0.00627724	0.000286187	0.0582386
UP_KEYWORDS	Metal-binding	21	18.9189	0.000109534	FBGN0011648, FBGN0003053, FBGN0003567, FBGN0262955, FBGN0002781, FBGN0011591, FBGN0004861, FBGN0261239, FBGN0004644, FBGN0260003, FBGN0003391, FBGN0026181, FBGN0003079, FBGN0261617, FBGN0013263, FBGN0033636, FBGN0023172, FBGN0027053, FBGN0003117, FBGN0000320, FBGN0002945	111	1008	13921	2.6128	0.0135991	0.000570357	0.126593
GOTERM_MF_4	GO:0046872~metal ion binding	29	26.1261	0.0815051	FBGN0026160, FBGN0262955, FBGN0002781, FBGN0001075, FBGN0004647, FBGN0004861, FBGN0000497, FBGN0261239, FBGN0004644, FBGN0003391, FBGN0260003, FBGN0000463, FBGN0261617, FBGN0003079, FBGN0013263, FBGN0033636, FBGN0027053, FBGN0000320, FBGN0003567, FBGN0003053, FBGN0011648, FBGN0264089, FBGN0013733, FBGN0011591, FBGN0011829, FBGN0026181, FBGN0023172, FBGN0003117, FBGN0002945	102	1736	8080	1.3233	0.999779	0.295807	61.0101
Annotation Cluster 44	Enrichment Score: 3.48494258798757
Category	Term	Count	%	PValue	Genes	List Total	Pop Hits	Pop Total	Fold Enrichment	Bonferroni	Benjamini	FDR
GOTERM_BP_4	GO:0042060~wound healing	11	9.90991	3.31033e-08	FBGN0003391, FBGN0003042, FBGN0001291, FBGN0026181, FBGN0002576, FBGN0003731, FBGN0000229, FBGN0010333, FBGN0003256, FBGN0014020, FBGN0265434	111	90	10386	11.436	3.54861e-05	2.03947e-07	5.27656e-05
GOTERM_BP_4	GO:0042692~muscle cell differentiation	12	10.8108	7.05876e-08	FBGN0260642, FBGN0014388, FBGN0000606, FBGN0026181, FBGN0000097, FBGN0003731, FBGN0004657, FBGN0025641, FBGN0010333, FBGN0004647, FBGN0014020, FBGN0265434	111	124	10386	9.05493	7.56671e-05	4.18066e-07	0.000112514
GOTERM_BP_4	GO:0090303~positive regulation of wound healing	5	4.5045	5.52358e-06	FBGN0026181, FBGN0003731, FBGN0010333, FBGN0003256, FBGN0014020	111	12	10386	38.9865	0.0059038	2.58569e-05	0.00880406
GOTERM_BP_4	GO:0051153~regulation of striated muscle cell differentiation	5	4.5045	7.91348e-06	FBGN0000606, FBGN0026181, FBGN0025641, FBGN0014020, FBGN0265434	111	13	10386	35.9875	0.0084474	3.57938e-05	0.0126131
GOTERM_BP_4	GO:0051147~regulation of muscle cell differentiation	5	4.5045	7.91348e-06	FBGN0000606, FBGN0026181, FBGN0025641, FBGN0014020, FBGN0265434	111	13	10386	35.9875	0.0084474	3.57938e-05	0.0126131
GOTERM_BP_4	GO:0051017~actin filament bundle assembly	6	5.40541	9.84412e-06	FBGN0004009, FBGN0026181, FBGN0004657, FBGN0025641, FBGN0010333, FBGN0014020	111	28	10386	20.0502	0.0104975	4.36063e-05	0.0156901
GOTERM_BP_4	GO:0061572~actin filament bundle organization	6	5.40541	1.95018e-05	FBGN0004009, FBGN0026181, FBGN0004657, FBGN0025641, FBGN0010333, FBGN0014020	111	32	10386	17.5439	0.0206891	8.16613e-05	0.0310808
GOTERM_BP_4	GO:1903036~positive regulation of response to wounding	5	4.5045	1.96551e-05	FBGN0026181, FBGN0003731, FBGN0010333, FBGN0003256, FBGN0014020	111	16	10386	29.2399	0.0208501	8.1983e-05	0.0313251
GOTERM_BP_4	GO:0055001~muscle cell development	7	6.30631	3.18404e-05	FBGN0014388, FBGN0000097, FBGN0004657, FBGN0025641, FBGN0010333, FBGN0014020, FBGN0265434	111	58	10386	11.2926	0.0335575	0.000128797	0.0507406
GOTERM_BP_4	GO:1903034~regulation of response to wounding	5	4.5045	7.52196e-05	FBGN0026181, FBGN0003731, FBGN0010333, FBGN0003256, FBGN0014020	111	22	10386	21.2654	0.0774728	0.000285911	0.11983
GOTERM_BP_4	GO:0060142~regulation of syncytium formation by plasma membrane fusion	4	3.6036	0.000131416	FBGN0000606, FBGN0026181, FBGN0014020, FBGN0265434	111	10	10386	37.427	0.131413	0.00048738	0.209268
GOTERM_BP_4	GO:0000281~mitotic cytokinesis	6	5.40541	0.000606219	FBGN0026181, FBGN0053554, FBGN0003041, FBGN0004635, FBGN0014020, FBGN0265434	111	65	10386	8.63701	0.477988	0.00206813	0.961931
GOTERM_BP_4	GO:0061640~cytoskeleton-dependent cytokinesis	7	6.30631	0.00102997	FBGN0026181, FBGN0013718, FBGN0053554, FBGN0003041, FBGN0004635, FBGN0014020, FBGN0265434	111	109	10386	6.00893	0.668688	0.00339329	1.62916
GOTERM_BP_4	GO:0000910~cytokinesis	7	6.30631	0.00113218	FBGN0026181, FBGN0013718, FBGN0053554, FBGN0003041, FBGN0004635, FBGN0014020, FBGN0265434	111	111	10386	5.90066	0.703107	0.00370682	1.78948
GOTERM_BP_4	GO:0000768~syncytium formation by plasma membrane fusion	5	4.5045	0.00234054	FBGN0000606, FBGN0026181, FBGN0010333, FBGN0014020, FBGN0265434	111	53	10386	8.82713	0.918894	0.00723382	3.66623
GOTERM_BP_4	GO:0006949~syncytium formation	5	4.5045	0.00234054	FBGN0000606, FBGN0026181, FBGN0010333, FBGN0014020, FBGN0265434	111	53	10386	8.82713	0.918894	0.00723382	3.66623
GOTERM_BP_4	GO:0032507~maintenance of protein location in cell	4	3.6036	0.00544838	FBGN0026181, FBGN0000117, FBGN0003041, FBGN0265434	111	34	10386	11.0079	0.997139	0.0160925	8.33989
GOTERM_MF_4	GO:0019900~kinase binding	5	4.5045	0.0061854	FBGN0026597, FBGN0000117, FBGN0010333, FBGN0003256, FBGN0014020	102	59	8080	6.71319	0.458957	0.054311	6.64276
GOTERM_BP_4	GO:0045185~maintenance of protein location	4	3.6036	0.00800907	FBGN0026181, FBGN0000117, FBGN0003041, FBGN0265434	111	39	10386	9.59667	0.99982	0.0230288	12.0302
GOTERM_BP_4	GO:0034331~cell junction maintenance	3	2.7027	0.00803441	FBGN0010333, FBGN0003256, FBGN0014020	111	13	10386	21.5925	0.999824	0.0230395	12.066
GOTERM_BP_4	GO:0051651~maintenance of location in cell	4	3.6036	0.00983309	FBGN0026181, FBGN0000117, FBGN0003041, FBGN0265434	111	42	10386	8.9112	0.999975	0.0277077	14.5734
GOTERM_BP_4	GO:0030239~myofibril assembly	4	3.6036	0.0104903	FBGN0004657, FBGN0025641, FBGN0014020, FBGN0265434	111	43	10386	8.70396	0.999988	0.0293882	15.4727
GOTERM_BP_4	GO:0000912~assembly of actomyosin apparatus involved in cytokinesis	3	2.7027	0.026361	FBGN0013718, FBGN0003041, FBGN0014020	111	24	10386	11.6959	1	0.0690925	34.6769
GOTERM_BP_4	GO:0032506~cytokinetic process	3	2.7027	0.0727838	FBGN0013718, FBGN0003041, FBGN0014020	111	42	10386	6.6834	1	0.172441	70.017
GOTERM_BP_4	GO:0070925~organelle assembly	5	4.5045	0.471571	FBGN0004657, FBGN0025641, FBGN0003041, FBGN0014020, FBGN0265434	111	333	10386	1.40492	1	0.768007	99.9962
Annotation Cluster 45	Enrichment Score: 3.3392626099197673
Category	Term	Count	%	PValue	Genes	List Total	Pop Hits	Pop Total	Fold Enrichment	Bonferroni	Benjamini	FDR
GOTERM_BP_4	GO:0007445~determination of imaginal disc primordium	4	3.6036	0.000179305	FBGN0004009, FBGN0003731, FBGN0003892, FBGN0004635	111	11	10386	34.0246	0.174885	0.000647036	0.285424
GOTERM_BP_4	GO:2001013~epithelial cell proliferation involved in renal tubule morphogenesis	4	3.6036	0.000179305	FBGN0004009, FBGN0003731, FBGN0004647, FBGN0004635	111	11	10386	34.0246	0.174885	0.000647036	0.285424
GOTERM_BP_4	GO:0060573~cell fate specification involved in pattern specification	3	2.7027	0.00298558	FBGN0004009, FBGN0003731, FBGN0004635	111	8	10386	35.0878	0.959454	0.00909041	4.65424
Annotation Cluster 46	Enrichment Score: 3.2953709854589235
Category	Term	Count	%	PValue	Genes	List Total	Pop Hits	Pop Total	Fold Enrichment	Bonferroni	Benjamini	FDR
GOTERM_BP_4	GO:0048138~germ-line cyst encapsulation	5	4.5045	6.20478e-05	FBGN0003391, FBGN0003731, FBGN0004647, FBGN0027053, FBGN0004861	111	21	10386	22.278	0.0643533	0.000236688	0.0988565
GOTERM_BP_4	GO:0048139~female germ-line cyst encapsulation	4	3.6036	0.000306027	FBGN0003391, FBGN0003731, FBGN0004647, FBGN0004861	111	13	10386	28.79	0.279717	0.00107873	0.486685
GOTERM_BP_4	GO:0030708~germarium-derived female germ-line cyst encapsulation	3	2.7027	0.00684542	FBGN0003391, FBGN0004647, FBGN0004861	111	12	10386	23.3919	0.999366	0.0198642	10.3708
Annotation Cluster 47	Enrichment Score: 3.2706970302303797
Category	Term	Count	%	PValue	Genes	List Total	Pop Hits	Pop Total	Fold Enrichment	Bonferroni	Benjamini	FDR
GOTERM_BP_4	GO:0031098~stress-activated protein kinase signaling cascade	10	9.00901	1.06652e-07	FBGN0003053, FBGN0001291, FBGN0033483, FBGN0000097, FBGN0010909, FBGN0000229, FBGN0010333, FBGN0004647, FBGN0003371, FBGN0014020	111	77	10386	12.1516	0.000114325	6.04926e-07	0.00017
GOTERM_BP_4	GO:1902532~negative regulation of intracellular signal transduction	9	8.10811	5.91529e-06	FBGN0014388, FBGN0003053, FBGN0264895, FBGN0000097, FBGN0010909, FBGN0015509, FBGN0000229, FBGN0004647, FBGN0003371	111	93	10386	9.05493	0.00632115	2.75701e-05	0.00942838
GOTERM_BP_4	GO:0051338~regulation of transferase activity	9	8.10811	1.45807e-05	FBGN0005592, FBGN0010909, FBGN0002121, FBGN0000229, FBGN0010382, FBGN0010333, FBGN0027053, FBGN0003371, FBGN0014020	111	105	10386	8.02008	0.0155091	6.17793e-05	0.0232387
GOTERM_BP_4	GO:0010563~negative regulation of phosphorus metabolic process	6	5.40541	0.00225641	FBGN0003053, FBGN0002121, FBGN0000229, FBGN0004647, FBGN0027053, FBGN0003371	111	87	10386	6.45294	0.911221	0.00701482	3.53666
GOTERM_BP_4	GO:0045787~positive regulation of cell cycle	5	4.5045	0.00234054	FBGN0000463, FBGN0010382, FBGN0004647, FBGN0027053, FBGN0003371	111	53	10386	8.82713	0.918894	0.00723382	3.66623
GOTERM_BP_4	GO:0032269~negative regulation of cellular protein metabolic process	9	8.10811	0.00263872	FBGN0004644, FBGN0003053, FBGN0002121, FBGN0000229, FBGN0010382, FBGN0004647, FBGN0027053, FBGN0003371, FBGN0010415	111	225	10386	3.7427	0.941132	0.00810619	4.12415
GOTERM_BP_4	GO:0051248~negative regulation of protein metabolic process	9	8.10811	0.00271191	FBGN0004644, FBGN0003053, FBGN0002121, FBGN0000229, FBGN0010382, FBGN0004647, FBGN0027053, FBGN0003371, FBGN0010415	111	226	10386	3.72614	0.945585	0.0083066	4.23622
GOTERM_BP_4	GO:0043086~negative regulation of catalytic activity	5	4.5045	0.00932115	FBGN0002121, FBGN0000229, FBGN0010382, FBGN0027053, FBGN0003371	111	78	10386	5.99792	0.999956	0.0264159	13.8666
GOTERM_BP_4	GO:0070302~regulation of stress-activated protein kinase signaling cascade	4	3.6036	0.0213487	FBGN0003053, FBGN0000229, FBGN0004647, FBGN0003371	111	56	10386	6.6834	1	0.0567447	29.1055
GOTERM_BP_4	GO:0080135~regulation of cellular response to stress	5	4.5045	0.0283832	FBGN0003053, FBGN0000229, FBGN0004647, FBGN0003371, FBGN0000320	111	109	10386	4.29209	1	0.0739096	36.8062
Annotation Cluster 48	Enrichment Score: 3.249767296529998
Category	Term	Count	%	PValue	Genes	List Total	Pop Hits	Pop Total	Fold Enrichment	Bonferroni	Benjamini	FDR
GOTERM_BP_4	GO:0008285~negative regulation of cell proliferation	10	9.00901	2.28849e-07	FBGN0002783, FBGN0263289, FBGN0011715, FBGN0261885, FBGN0000490, FBGN0002121, FBGN0001075, FBGN0027053, FBGN0001233, FBGN0000212	111	84	10386	11.139	0.000245296	1.25166e-06	0.000364778
GOTERM_BP_4	GO:0072091~regulation of stem cell proliferation	5	4.5045	0.000978055	FBGN0002783, FBGN0004009, FBGN0261885, FBGN0002121, FBGN0000212	111	42	10386	11.139	0.649708	0.00323238	1.54765
GOTERM_BP_4	GO:0007405~neuroblast proliferation	6	5.40541	0.00203678	FBGN0002783, FBGN0261885, FBGN0002121, FBGN0000212, FBGN0014020, FBGN0265434	111	85	10386	6.60477	0.887595	0.00640777	3.19763
GOTERM_BP_4	GO:2000178~negative regulation of neural precursor cell proliferation	4	3.6036	0.00280994	FBGN0002783, FBGN0261885, FBGN0002121, FBGN0000212	111	27	10386	13.8619	0.951028	0.00858153	4.38616
GOTERM_BP_4	GO:2000647~negative regulation of stem cell proliferation	4	3.6036	0.00418774	FBGN0002783, FBGN0261885, FBGN0002121, FBGN0000212	111	31	10386	12.0732	0.988876	0.0124875	6.47033
GOTERM_BP_4	GO:2000177~regulation of neural precursor cell proliferation	4	3.6036	0.00591376	FBGN0002783, FBGN0261885, FBGN0002121, FBGN0000212	111	35	10386	10.6934	0.998268	0.0172226	9.02117
Annotation Cluster 49	Enrichment Score: 3.2138967651945105
Category	Term	Count	%	PValue	Genes	List Total	Pop Hits	Pop Total	Fold Enrichment	Bonferroni	Benjamini	FDR
GOTERM_BP_4	GO:0050890~cognition	11	9.90991	1.41432e-05	FBGN0000635, FBGN0004009, FBGN0263289, FBGN0017590, FBGN0003731, FBGN0000117, FBGN0000229, FBGN0010333, FBGN0004647, FBGN0004635, FBGN0003371	111	173	10386	5.94938	0.0150472	6.06444e-05	0.0225414
GOTERM_BP_4	GO:0097305~response to alcohol	9	8.10811	5.16407e-05	FBGN0000635, FBGN0011706, FBGN0017590, FBGN0003731, FBGN0002121, FBGN0003256, FBGN0003997, FBGN0004635, FBGN0004861	111	125	10386	6.73686	0.0538558	0.000199118	0.082282
GOTERM_BP_4	GO:0042048~olfactory behavior	7	6.30631	0.00225577	FBGN0000635, FBGN0263289, FBGN0250876, FBGN0017590, FBGN0003731, FBGN0004635, FBGN0003371	111	127	10386	5.15727	0.91116	0.00703321	3.53567
GOTERM_BP_4	GO:0048149~behavioral response to ethanol	5	4.5045	0.00305683	FBGN0000635, FBGN0017590, FBGN0003731, FBGN0003256, FBGN0004635	111	57	10386	8.20768	0.962445	0.00928037	4.7628
GOTERM_BP_4	GO:0007612~learning	5	4.5045	0.0169204	FBGN0000635, FBGN0017590, FBGN0003731, FBGN0004635, FBGN0003371	111	93	10386	5.03051	1	0.0457098	23.8157
Annotation Cluster 50	Enrichment Score: 3.1417599561903695
Category	Term	Count	%	PValue	Genes	List Total	Pop Hits	Pop Total	Fold Enrichment	Bonferroni	Benjamini	FDR
KEGG_PATHWAY	dme04320:Dorso-ventral axis formation	6	5.40541	5.88233e-05	FBGN0004875, FBGN0000097, FBGN0003731, FBGN0003205, FBGN0003256, FBGN0004647	48	26	2752	13.2308	0.00176319	0.000352888	0.0500972
GOTERM_BP_4	GO:0010259~multicellular organism aging	8	7.20721	0.00237815	FBGN0001291, FBGN0000097, FBGN0003731, FBGN0003205, FBGN0004657, FBGN0003256, FBGN0004647, FBGN0030057	111	173	10386	4.32682	0.922106	0.00732867	3.7241
KEGG_PATHWAY	dme04013:MAPK signaling pathway - fly	4	3.6036	0.00268492	FBGN0000097, FBGN0003731, FBGN0003205, FBGN0003256	48	17	2752	13.4902	0.077489	0.0114562	2.26419
Annotation Cluster 51	Enrichment Score: 2.9827518244535844
Category	Term	Count	%	PValue	Genes	List Total	Pop Hits	Pop Total	Fold Enrichment	Bonferroni	Benjamini	FDR
INTERPRO	IPR009057:Homeodomain-like	9	8.10811	8.72412e-05	FBGN0003339, FBGN0260642, FBGN0002783, FBGN0004198, FBGN0086680, FBGN0000606, FBGN0036285, FBGN0005561, FBGN0000625	106	149	10984	6.25909	0.0260039	0.00656535	0.116636
GOTERM_BP_4	GO:0035287~head segmentation	5	4.5045	0.000107498	FBGN0003339, FBGN0260642, FBGN0004644, FBGN0004009, FBGN0000606	111	24	10386	19.4932	0.108851	0.000400071	0.17121
UP_KEYWORDS	Homeobox	7	6.30631	0.000171858	FBGN0003339, FBGN0260642, FBGN0004198, FBGN0086680, FBGN0000606, FBGN0036285, FBGN0000625	111	104	13921	8.44135	0.0212549	0.000825968	0.198558
INTERPRO	IPR017970:Homeobox, conserved site	7	6.30631	0.000242352	FBGN0003339, FBGN0260642, FBGN0004198, FBGN0086680, FBGN0000606, FBGN0036285, FBGN0000625	106	92	10984	7.88433	0.0705844	0.0121258	0.323698
INTERPRO	IPR001356:Homeodomain	7	6.30631	0.000423772	FBGN0003339, FBGN0260642, FBGN0004198, FBGN0086680, FBGN0000606, FBGN0036285, FBGN0000625	106	102	10984	7.11136	0.120152	0.0181204	0.565378
SMART	SM00389:HOX	7	6.30631	0.00449703	FBGN0003339, FBGN0260642, FBGN0004198, FBGN0086680, FBGN0000606, FBGN0036285, FBGN0000625	81	102	5218	4.42096	0.379829	0.379829	4.93174
UP_SEQ_FEATURE	DNA-binding region:Homeobox	5	4.5045	0.033072	FBGN0003339, FBGN0260642, FBGN0004198, FBGN0086680, FBGN0000606	76	51	3113	4.01574	1	0.479077	37.9058
INTERPRO	IPR020479:Homeodomain, metazoa	3	2.7027	0.0558124	FBGN0003339, FBGN0260642, FBGN0000606	106	40	10984	7.7717	1	0.408785	53.6163
Annotation Cluster 52	Enrichment Score: 2.870384141184466
Category	Term	Count	%	PValue	Genes	List Total	Pop Hits	Pop Total	Fold Enrichment	Bonferroni	Benjamini	FDR
UP_KEYWORDS	Chromatin regulator	7	6.30631	3.69285e-05	FBGN0003567, FBGN0261885, FBGN0002781, FBGN0013263, FBGN0053554, FBGN0022238, FBGN0000212	111	79	13921	11.1127	0.00460551	0.000219792	0.0426962
GOTERM_BP_4	GO:0051276~chromosome organization	17	15.3153	0.00583827	FBGN0026160, FBGN0002783, FBGN0003567, FBGN0004875, FBGN0261885, FBGN0002781, FBGN0004861, FBGN0011715, FBGN0026181, FBGN0261617, FBGN0013263, FBGN0033636, FBGN0053554, FBGN0022238, FBGN0003371, FBGN0000212, FBGN0000320	111	756	10386	2.10403	0.998121	0.0170501	8.91099
GOTERM_BP_4	GO:0006325~chromatin organization	13	11.7117	0.0113554	FBGN0026160, FBGN0002783, FBGN0003567, FBGN0011715, FBGN0261885, FBGN0261617, FBGN0002781, FBGN0013263, FBGN0033636, FBGN0053554, FBGN0022238, FBGN0000212, FBGN0000320	111	538	10386	2.26093	0.999995	0.0315406	16.6429
Annotation Cluster 53	Enrichment Score: 2.849800883590093
Category	Term	Count	%	PValue	Genes	List Total	Pop Hits	Pop Total	Fold Enrichment	Bonferroni	Benjamini	FDR
GOTERM_BP_4	GO:0010675~regulation of cellular carbohydrate metabolic process	9	8.10811	0.000759284	FBGN0261239, FBGN0016797, FBGN0261617, FBGN0003731, FBGN0010909, FBGN0015509, FBGN0011766, FBGN0004647, FBGN0003117	111	185	10386	4.55194	0.557034	0.00254929	1.20344
GOTERM_BP_4	GO:0006109~regulation of carbohydrate metabolic process	9	8.10811	0.000903502	FBGN0261239, FBGN0016797, FBGN0261617, FBGN0003731, FBGN0010909, FBGN0015509, FBGN0011766, FBGN0004647, FBGN0003117	111	190	10386	4.43215	0.620534	0.00300477	1.43047
GOTERM_BP_4	GO:0044262~cellular carbohydrate metabolic process	9	8.10811	0.004114	FBGN0261239, FBGN0016797, FBGN0261617, FBGN0003731, FBGN0010909, FBGN0015509, FBGN0011766, FBGN0004647, FBGN0003117	111	242	10386	3.47979	0.987957	0.0123027	6.35987
Annotation Cluster 54	Enrichment Score: 2.7173283710894065
Category	Term	Count	%	PValue	Genes	List Total	Pop Hits	Pop Total	Fold Enrichment	Bonferroni	Benjamini	FDR
GOTERM_BP_4	GO:0001704~formation of primary germ layer	6	5.40541	3.52992e-05	FBGN0011648, FBGN0003716, FBGN0264089, FBGN0000490, FBGN0003041, FBGN0002643	111	36	10386	15.5946	0.0371344	0.00014119	0.0562511
GOTERM_BP_4	GO:0048332~mesoderm morphogenesis	4	3.6036	0.00500579	FBGN0004009, FBGN0264089, FBGN0003041, FBGN0002643	111	33	10386	11.3415	0.995391	0.0148325	7.68755
GOTERM_BP_4	GO:0001707~mesoderm formation	3	2.7027	0.039882	FBGN0264089, FBGN0003041, FBGN0002643	111	30	10386	9.35676	1	0.100252	47.7291
Annotation Cluster 55	Enrichment Score: 2.657334833735208
Category	Term	Count	%	PValue	Genes	List Total	Pop Hits	Pop Total	Fold Enrichment	Bonferroni	Benjamini	FDR
GOTERM_BP_4	GO:0098742~cell-cell adhesion via plasma-membrane adhesion molecules	11	9.90991	9.38077e-10	FBGN0005775, FBGN0000635, FBGN0003391, FBGN0003053, FBGN0017590, FBGN0001085, FBGN0004657, FBGN0001075, FBGN0004647, FBGN0013433, FBGN0000497	111	63	10386	16.3372	1.00562e-06	6.84095e-09	1.49527e-06
UP_KEYWORDS	Cell adhesion	7	6.30631	2.86202e-06	FBGN0005775, FBGN0000635, FBGN0003391, FBGN0004657, FBGN0000117, FBGN0001075, FBGN0000497	111	51	13921	17.2137	0.000357689	2.23593e-05	0.00330962
GOTERM_BP_4	GO:0044331~cell-cell adhesion mediated by cadherin	4	3.6036	0.0004794	FBGN0003391, FBGN0001075, FBGN0004647, FBGN0000497	111	15	10386	24.9514	0.401926	0.0016515	0.761419
UP_KEYWORDS	Calcium	6	5.40541	0.00233587	FBGN0004644, FBGN0003391, FBGN0260003, FBGN0001075, FBGN0002945, FBGN0000497	111	117	13921	6.43151	0.253474	0.00808726	2.66814
INTERPRO	IPR020894:Cadherin conserved site	3	2.7027	0.00764231	FBGN0003391, FBGN0001075, FBGN0000497	106	14	10984	22.2049	0.901416	0.109384	9.75306
INTERPRO	IPR002126:Cadherin	3	2.7027	0.00995327	FBGN0003391, FBGN0001075, FBGN0000497	106	16	10984	19.4292	0.951245	0.133986	12.5242
INTERPRO	IPR015919:Cadherin-like	3	2.7027	0.0125339	FBGN0003391, FBGN0001075, FBGN0000497	106	18	10984	17.2704	0.977833	0.158983	15.5254
UP_SEQ_FEATURE	domain:Cadherin 7	3	2.7027	0.0184799	FBGN0003391, FBGN0001075, FBGN0000497	76	9	3113	13.6535	0.999756	0.386982	23.2248
UP_SEQ_FEATURE	domain:Cadherin 6	3	2.7027	0.0184799	FBGN0003391, FBGN0001075, FBGN0000497	76	9	3113	13.6535	0.999756	0.386982	23.2248
UP_SEQ_FEATURE	domain:Cadherin 5	3	2.7027	0.0184799	FBGN0003391, FBGN0001075, FBGN0000497	76	9	3113	13.6535	0.999756	0.386982	23.2248
UP_SEQ_FEATURE	domain:Cadherin 4	3	2.7027	0.0184799	FBGN0003391, FBGN0001075, FBGN0000497	76	9	3113	13.6535	0.999756	0.386982	23.2248
UP_SEQ_FEATURE	domain:Cadherin 3	3	2.7027	0.022743	FBGN0003391, FBGN0001075, FBGN0000497	76	10	3113	12.2882	0.999965	0.43449	27.8168
SMART	SM00112:CA	3	2.7027	0.0242384	FBGN0003391, FBGN0001075, FBGN0000497	81	16	5218	12.0787	0.925795	0.405589	24.0678
UP_SEQ_FEATURE	domain:Cadherin 1	3	2.7027	0.0273683	FBGN0003391, FBGN0001075, FBGN0000497	76	11	3113	11.1711	0.999996	0.445314	32.5095
UP_SEQ_FEATURE	domain:Cadherin 2	3	2.7027	0.0273683	FBGN0003391, FBGN0001075, FBGN0000497	76	11	3113	11.1711	0.999996	0.445314	32.5095
