# Supplementary material
Source: publisher figshare collection journal article supplement (https://gsajournals.figshare.com/articles/dataset/_/6213629)

ETOH supplemented food

Regular food

A

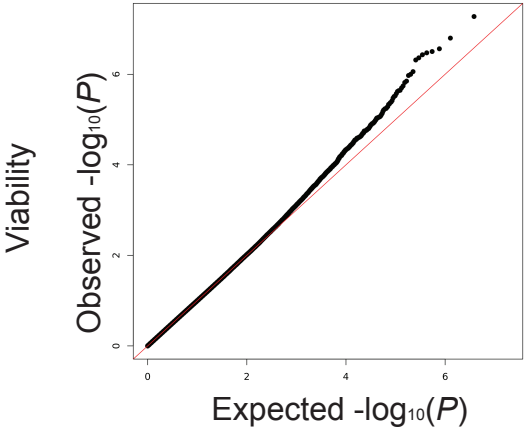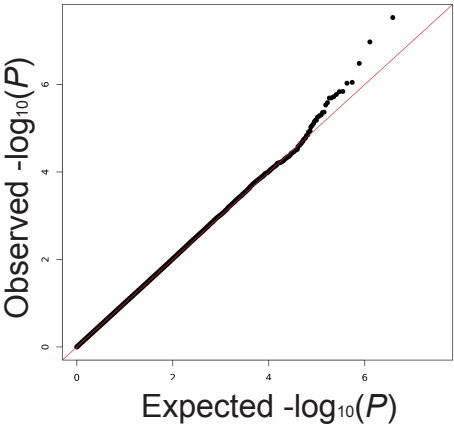

B

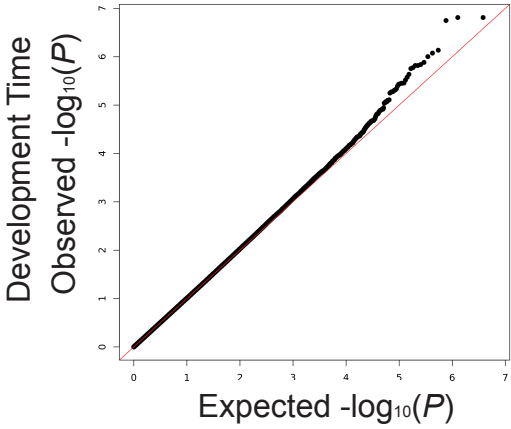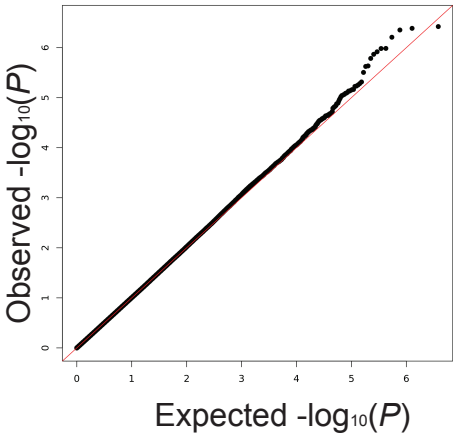

Supplement: Supplementary file 1 [file 1]

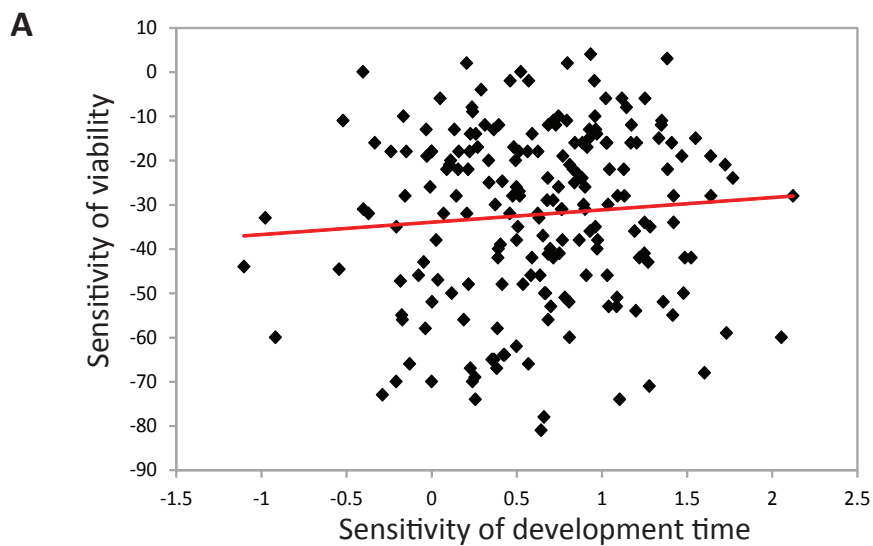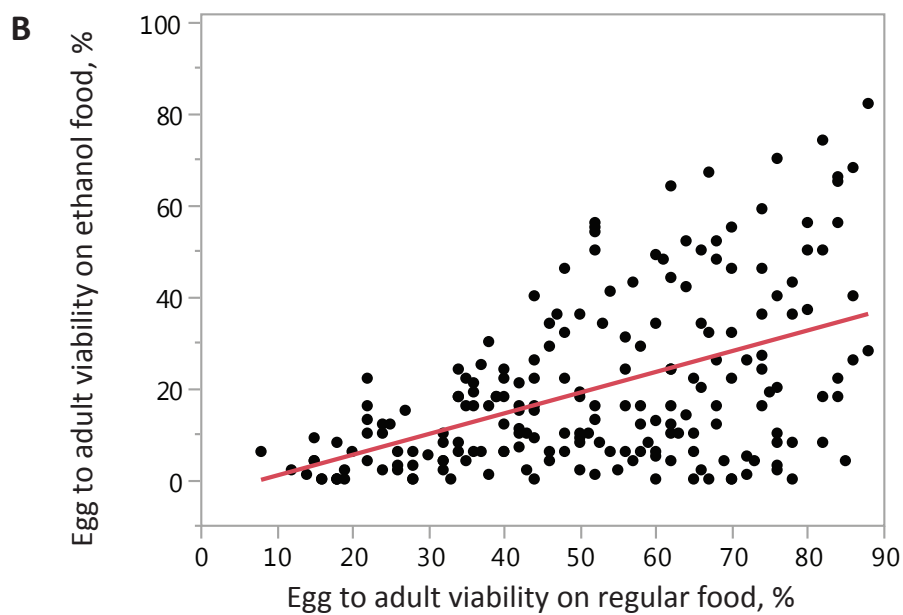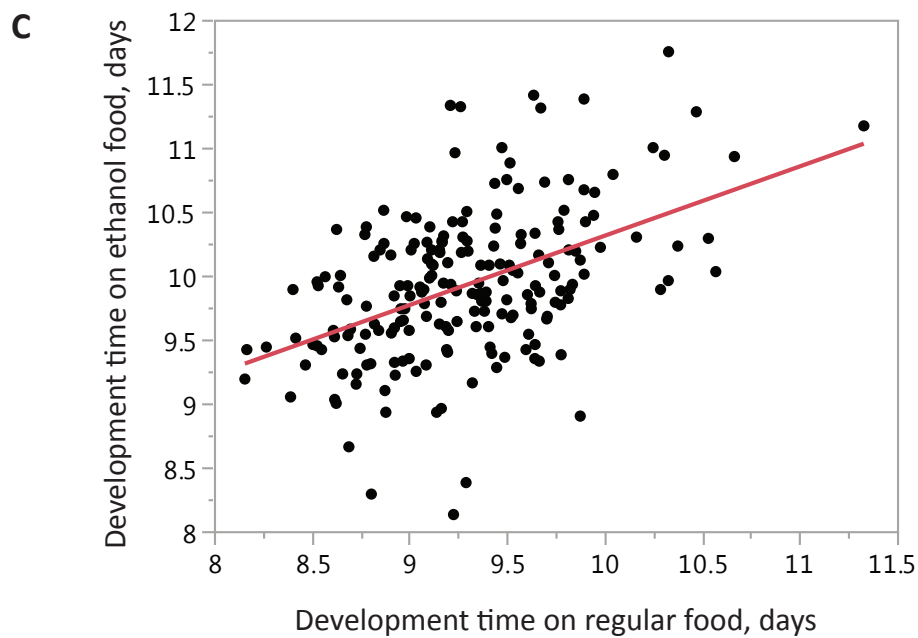

Supplement: Supplementary file 3 [file 1]
